# Supplementary material for: Botulinum toxin intoxication requires retrograde transport and membrane translocation at the ER in RenVM neurons
Source: eLife journal article supplement (doi:10.7554/elife.92806), 2023-12-21

**Figure 1B**

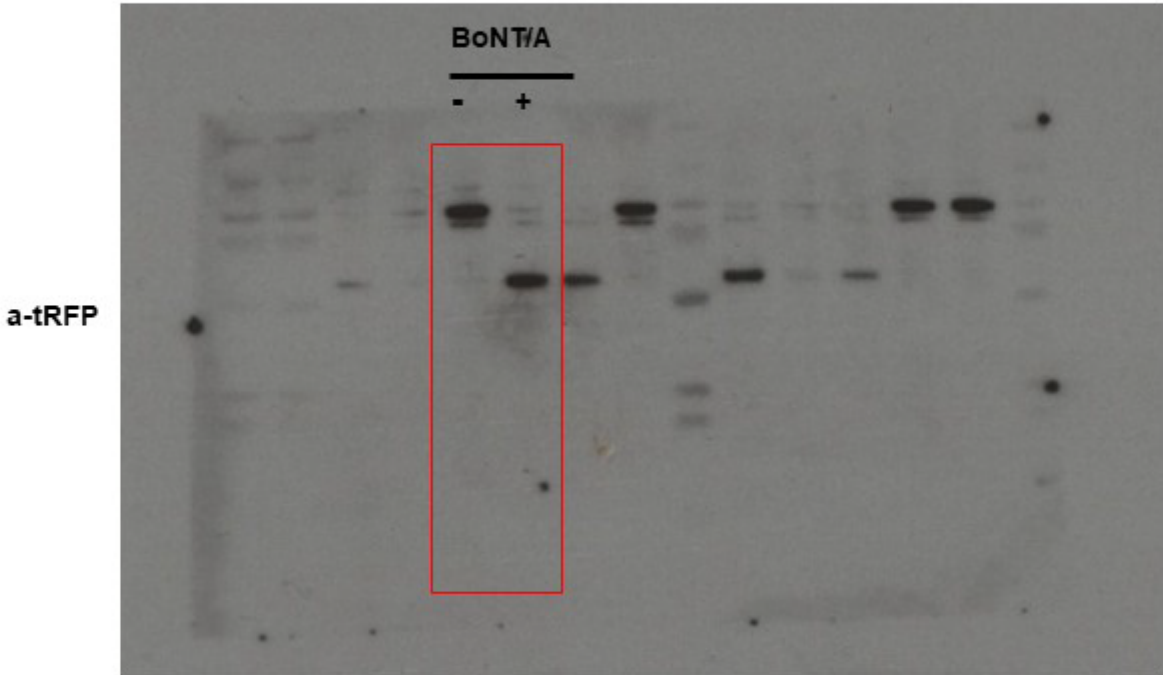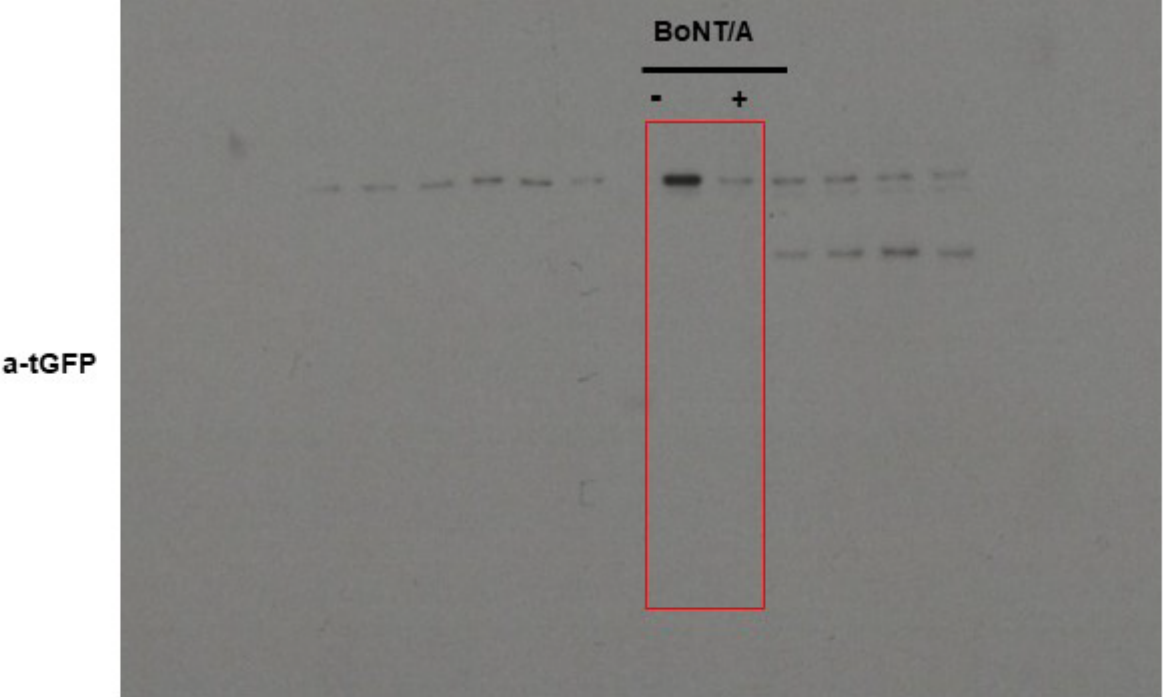

Supplement: fig1-data2 [file elife-92806-fig1-data2-v1.pdf]
