# Supplementary material for: Botulinum toxin intoxication requires retrograde transport and membrane translocation at the ER in RenVM neurons
Source: eLife. 2024 Aug 28;12:RP92806. doi: 10.7554/eLife.92806 (PMC11357346; doi:10.7554/eLife.92806)
Supplement: Figure 3—source data 1. — Column ‘Zscore_Log10_CtrlNorm’ was used to define the hits further studied. [file elife-92806-fig3-data1.xlsx]

## Sheet: Genome Raw Data
Plate	Well	WellType	GeneSymbol	Entrez_Gene_ID	Reagent_ID	Replicate 1 (GFP/RFP)	Replicate 2 (GFP/RFP)	Avg (Replicates)	Log10_Avg	Zscore_Log10_CtrlNorm	Zst_Avg	Zpl_Replicate 1	Zpl_Replicate 2	Avg_Zpl_Replicates	SE_Avg_Zpl_Replicates	CtrlNorm_Replicate 1	CtrlNorm_Replicate 2	Avg_CtrlNorm_Replicates
34*		S	GPRIN2	9721		0.159307	0.206783	0.183045	-0.737442	-5.41247	-2.26564	-2.27567	-1.94937	-2.11252	0.163149	-0.62961	-0.418281	-0.523946
15*		S	HADHA	3030		0.226598	0.14024	0.183419	-0.736556	-5.40615	-2.26472	-2.08036	-2.00844	-2.0444	0.0359586	-0.537165	-0.515872	-0.526519
57*		S	TMEM92	162461		0.215171	0.153808	0.18449	-0.734028	-5.38813	-2.26211	-2.38148	-1.92755	-2.15451	0.226967	-0.694783	-0.563444	-0.629114
28*		S	RPRM	56475		0.203841	0.219465	0.211653	-0.674376	-4.96267	-2.1957	-1.8647	-1.98103	-1.92286	0.0581612	-0.484457	-0.422598	-0.453528
57*		S	KIAA1987	170951		0.228874	0.218664	0.223769	-0.6502	-4.79024	-2.16608	-2.36887	-1.8775	-2.12319	0.245688	-0.685939	-0.517221	-0.60158
41*		S	IL17D	53342		0.205599	0.247504	0.226551	-0.644833	-4.75196	-2.15928	-2.03104	-1.97815	-2.0046	0.0264462	-0.619812	-0.36277	-0.491291
43*		S	CNO	55330		0.229508	0.234294	0.231901	-0.634697	-4.67967	-2.1462	-1.95106	-2.15017	-2.05062	0.099555	-0.346385	-0.634111	-0.490248
22*		S	TNFSF18	8995		0.228431	0.239268	0.233849	-0.631064	-4.65375	-2.14144	-1.88901	-2.28662	-2.08782	0.198807	-0.428766	-0.594814	-0.51179
15*		S	TRRAP	8295		0.347158	0.132926	0.240042	-0.619713	-4.5728	-2.1263	-1.96938	-2.01408	-1.99173	0.0223498	-0.451675	-0.520412	-0.486043
15*		S	INPP5B	3633		0.276114	0.20505	0.240582	-0.618737	-4.56584	-2.12498	-2.03478	-1.95846	-1.99662	0.0381605	-0.502053	-0.475647	-0.48885
40*		S	IER5	51278		0.230224	0.26597	0.248097	-0.605378	-4.47056	-2.1066	-1.85344	-2.07954	-1.96649	0.113052	-0.490173	-0.533559	-0.511866
69*		S	LOC401701	401701		0.239466	0.281894	0.26068	-0.583892	-4.31732	-2.07584	-2.02243	-2.30627	-2.16435	0.141916	-0.623916	-0.6525	-0.638208
13*		S	PITX3	5309		0.195187	0.332932	0.26406	-0.578298	-4.27742	-2.06758	-2.17106	-1.92815	-2.04961	0.121456	-0.597212	-0.496328	-0.54677
25*		S	KIAA1217	56243		0.281619	0.251159	0.266389	-0.574484	-4.25021	-2.06189	-2.09404	-1.97092	-2.03248	0.0615617	-0.616786	-0.584954	-0.60087
65*		S	LOC338829	338829		0.307643	0.228181	0.267912	-0.572008	-4.23256	-2.05816	-1.91033	-1.93514	-1.92274	0.0124052	-0.594571	-0.323421	-0.458996
64*		S	RP11-35F15.2	347487		0.31557	0.227663	0.271616	-0.566044	-4.19002	-2.04911	-2.16915	-1.91714	-2.04314	0.126004	-0.549641	-0.37408	-0.46186
34*		S	SLC13A2	9058		0.231894	0.313583	0.272738	-0.564254	-4.17725	-2.04636	-2.21483	-1.86545	-2.04014	0.174689	-0.585584	-0.355857	-0.470721
71*		S	ZNF676	163223		0.309161	0.248628	0.278894	-0.55456	-4.10811	-2.03131	-1.93524	-1.85653	-1.89588	0.0393573	-0.609784	-0.406501	-0.508143
55*		S	C20orf135	140701		0.289736	0.277465	0.2836	-0.547293	-4.05628	-2.01981	-2.08433	-1.92442	-2.00437	0.0799519	-0.470456	-0.351798	-0.411127
18*		S	RAB7A	7879		0.3398	0.245507	0.292654	-0.533646	-3.95895	-1.99768	-2.21554	-2.49589	-2.35571	0.140176	-0.370797	-0.566118	-0.468458
15*		S	SOAT2	8435		0.474304	0.124635	0.299469	-0.523647	-3.88764	-1.98101	-1.85234	-2.02047	-1.93641	0.0840661	-0.361514	-0.525557	-0.443536
35*		S	ARHGAP11A	9824		0.30449	0.307274	0.305882	-0.514446	-3.82201	-1.96534	-1.84604	-2.09892	-1.97248	0.126444	-0.353885	-0.802125	-0.578005
57*		S	LDHD	197257		0.313317	0.305146	0.309231	-0.509716	-3.78828	-1.95715	-2.29118	-1.81076	-2.05097	0.240209	-0.631434	-0.455586	-0.54351
22*		S	NR4A1	3164		0.360043	0.277515	0.318779	-0.49651	-3.69409	-1.93381	-1.78649	-2.25026	-2.01838	0.231886	-0.345543	-0.569916	-0.45773
71*		S	OR13G1	441933		0.314516	0.325679	0.320097	-0.494718	-3.6813	-1.93058	-1.93025	-1.79335	-1.8618	0.0684509	-0.604984	-0.354731	-0.479857
25*		S	CAV2	858		0.297469	0.345689	0.321579	-0.492712	-3.667	-1.92696	-2.08037	-1.89187	-1.98612	0.0942487	-0.605423	-0.514018	-0.559721
38*		S	SLITRK5	26050		0.28817	0.357014	0.322592	-0.491346	-3.65726	-1.92449	-2.15225	-1.86201	-2.00713	0.145121	-0.547481	-0.365984	-0.456732
23*		S	MAP7	9053		0.304343	0.341813	0.323078	-0.490693	-3.65259	-1.9233	-1.5805	-1.91809	-1.74929	0.168797	-0.333876	-0.550263	-0.442069
43*		S	POLR3B	55703		0.363059	0.283458	0.323259	-0.49045	-3.65086	-1.92286	-1.84123	-2.10911	-1.97517	0.133941	-0.272916	-0.600971	-0.436944
26*		S	LAMP2	3920		0.292019	0.354545	0.323282	-0.490418	-3.65064	-1.9228	-1.98078	-2.11725	-2.04901	0.0682334	-0.410754	-0.52892	-0.469837
31*		S	MT1F	4494		0.346143	0.310367	0.328255	-0.483789	-3.60335	-1.91064	-2.22407	-1.77447	-1.99927	0.224802	-0.512442	-0.376496	-0.444469
38*		S	TMEM59L	25789		0.299977	0.367835	0.333906	-0.476376	-3.55048	-1.89683	-2.14205	-1.85292	-1.99749	0.144568	-0.540038	-0.359018	-0.449528
43*		S	ARHGAP15	55843		0.209754	0.45905	0.334402	-0.475731	-3.54589	-1.89561	-1.96731	-1.96246	-1.96488	0.00242507	-0.357252	-0.482609	-0.41993
23*		S	EPC1	80314		0.342071	0.331449	0.33676	-0.472679	-3.52412	-1.88985	-1.55309	-1.9269	-1.74	0.186907	-0.304606	-0.558347	-0.431476
8*		S	CXCL2	2920		0.35108	0.3239	0.33749	-0.471739	-3.51741	-1.88806	-1.83805	-1.94189	-1.88997	0.0519181	-0.395457	-0.447802	-0.421629
35*		S	LPPR4	9890		0.331938	0.353008	0.342473	-0.465374	-3.47201	-1.87588	-1.82509	-2.05593	-1.94051	0.115417	-0.337831	-0.759547	-0.548689
42*		S	BCOR	54880		0.312616	0.375103	0.343859	-0.463619	-3.4595	-1.87249	-1.77982	-1.81288	-1.79635	0.0165304	-0.307313	-0.446487	-0.3769
21*		S	IFNA5	3442		0.340866	0.34953	0.345198	-0.461932	-3.44747	-1.86922	-1.8517	-1.83541	-1.84355	0.00814419	-0.440367	-0.334459	-0.387413
19*		S	CDC14C	168448		0.294938	0.397346	0.346142	-0.460746	-3.43901	-1.86691	-1.99287	-1.76571	-1.87929	0.113577	-0.431827	-0.323347	-0.377587
38*		S	LRIT1	26103		0.309133	0.388545	0.348839	-0.457375	-3.41497	-1.86032	-2.13415	-1.83552	-1.98483	0.149314	-0.534266	-0.345686	-0.439976
41*		S	SPIN2A	54466		0.298692	0.402368	0.35053	-0.455275	-3.39999	-1.85618	-1.95507	-1.85095	-1.90301	0.0520624	-0.552688	-0.277947	-0.415317
37*		S	ZBTB43	23099		0.369155	0.333043	0.351099	-0.45457	-3.39496	-1.85479	-1.79288	-1.94977	-1.87133	0.0784424	-0.443817	-0.426941	-0.435379
29*		S	CSH2	0		0.4054	0.302856	0.354128	-0.45084	-3.36835	-1.84739	-1.71982	-2.07205	-1.89594	0.176117	-0.215024	-0.647052	-0.431038
10*		S	GSN	2934		0.178581	0.531662	0.355121	-0.449623	-3.35968	-1.84496	-1.97407	-1.90065	-1.93736	0.0367086	-0.4705	-0.419202	-0.444851
71*		S	CLDN20	49861		0.340695	0.371196	0.355946	-0.448616	-3.3525	-1.84295	-1.90586	-1.75603	-1.83094	0.0749165	-0.581514	-0.324149	-0.452831
51*		S	GFM1	85476		0.39701	0.318545	0.357778	-0.446387	-3.3366	-1.83847	-1.94779	-2.32878	-2.13828	0.190494	-0.369323	-0.614449	-0.491886
70*		S	LOC388270	388270		0.377139	0.339038	0.358088	-0.44601	-3.3339	-1.83771	-1.72284	-1.91818	-1.82051	0.0976714	-0.253235	-0.469651	-0.361443
34*		S	PSMF1	9491		0.314246	0.403934	0.35909	-0.444797	-3.32525	-1.83526	-2.14581	-1.79446	-1.97013	0.175675	-0.535635	-0.303047	-0.419341
18*		S	RNH1	6050		0.336892	0.385346	0.361119	-0.44235	-3.3078	-1.8303	-2.21898	-2.34191	-2.28045	0.0614651	-0.372578	-0.479924	-0.426251
15*		S	PDE4C	5143		0.41335	0.31283	0.36309	-0.439986	-3.29094	-1.82548	-1.90845	-1.87533	-1.89189	0.0165591	-0.404737	-0.408751	-0.406744
61*		S	EYS	346007		0.406241	0.322425	0.364333	-0.438501	-3.28035	-1.82244	-1.70959	-2.12158	-1.91559	0.205998	-0.470585	-0.63462	-0.552603
57*		S	CALML6	163688		0.322124	0.407939	0.365032	-0.43767	-3.27442	-1.82073	-2.28308	-1.73144	-2.00726	0.27582	-0.625749	-0.382325	-0.504037
15*		S	PDIA5	10954		0.277727	0.455767	0.366747	-0.435633	-3.2599	-1.81654	-2.03329	-1.76509	-1.89919	0.134099	-0.500909	-0.320035	-0.410472
31*		S	ALDH8A1	64577		0.305691	0.429687	0.367689	-0.434519	-3.25195	-1.81424	-2.26183	-1.68777	-1.9748	0.287028	-0.537111	-0.301392	-0.419251
71*		S	ZNF429	353088		0.358557	0.38128	0.369918	-0.431894	-3.23323	-1.80878	-1.88922	-1.74776	-1.81849	0.0707301	-0.5655	-0.317374	-0.441437
38*		S	RPS27L	51065		0.376921	0.36314	0.37003	-0.431762	-3.23229	-1.80851	-2.07559	-1.85686	-1.96622	0.10936	-0.491531	-0.36204	-0.426786
50*		S	PLA2G12B	84647		0.395714	0.358101	0.376908	-0.423765	-3.17525	-1.7917	-1.64438	-1.95194	-1.79816	0.153781	-0.290025	-0.453881	-0.371953
37*		S	PLXND1	23129		0.444336	0.311142	0.377739	-0.422808	-3.16843	-1.78967	-1.7303	-1.96652	-1.84841	0.118113	-0.385911	-0.439673	-0.412792
34*		S	CLDN6	9074		0.413451	0.34434	0.378895	-0.421481	-3.15896	-1.78684	-2.06266	-1.84129	-1.95197	0.110688	-0.475464	-0.33788	-0.406672
55*		S	LOC146795	146795		0.352328	0.407734	0.380031	-0.420181	-3.14969	-1.78406	-2.03097	-1.8074	-1.91919	0.111787	-0.433004	-0.271048	-0.352026
57*		S	ZNF579	163033		0.331765	0.434426	0.383095	-0.416693	-3.12481	-1.77657	-2.27421	-1.711	-1.9926	0.281605	-0.619526	-0.363448	-0.491487
45*		S	GRHL3	57822		0.450356	0.316774	0.383565	-0.416161	-3.12102	-1.77542	-1.77348	-1.8893	-1.83139	0.0579126	-0.47453	-0.280279	-0.377404
69*		S	LOC400164	400164		0.427346	0.340076	0.383711	-0.415996	-3.11984	-1.77507	-1.87019	-2.25417	-2.06218	0.19199	-0.488872	-0.614846	-0.551859
34*		S	CKAP5	9793		0.322574	0.445652	0.384113	-0.415541	-3.11659	-1.77408	-2.13883	-1.76168	-1.95025	0.188575	-0.530584	-0.278663	-0.404623
57*		S	FLJ39061	165057		0.394155	0.382621	0.388388	-0.410734	-3.08231	-1.76363	-2.2168	-1.75097	-1.98389	0.232914	-0.579256	-0.400369	-0.489813
59*		S	KANK3	256949		0.455155	0.32257	0.388862	-0.410204	-3.07853	-1.76247	-1.67017	-1.97398	-1.82207	0.151903	-0.346731	-0.521743	-0.434237
10*		S	HNRNPUL1	11100		0.362876	0.421648	0.392262	-0.406424	-3.05157	-1.75416	-1.83184	-2.00305	-1.91744	0.0856043	-0.358672	-0.500445	-0.429558
11*		S	MAFF	23764		0.197562	0.588548	0.393055	-0.405547	-3.04531	-1.75222	-1.95042	-1.79557	-1.87299	0.077426	-0.456539	-0.368953	-0.412746
68*		S	LOC390009	390009		0.417443	0.369221	0.393332	-0.405241	-3.04313	-1.75155	-1.58808	-1.89239	-1.74024	0.152155	-0.295884	-0.31688	-0.306382
50*		S	SPINK7	84651		0.417996	0.369117	0.393556	-0.404993	-3.04136	-1.751	-1.62685	-1.94233	-1.78459	0.157741	-0.274305	-0.446314	-0.36031
69*		S	LOC390569	390569		0.201081	0.587169	0.394125	-0.404366	-3.03689	-1.74961	-2.05354	-2.03294	-2.04324	0.0102962	-0.651507	-0.454935	-0.553221
63*		S	C1orf224	343531		0.451375	0.339514	0.395444	-0.402914	-3.02654	-1.74638	-1.88345	-2.04749	-1.96547	0.082018	-0.411949	-0.519061	-0.465505
18*		S	PPP1R12B	4660		0.446006	0.346302	0.396154	-0.402136	-3.02099	-1.74465	-2.08971	-2.3849	-2.23731	0.147598	-0.305753	-0.50399	-0.404872
41*		S	ETAA1	54465		0.423509	0.369527	0.396518	-0.401737	-3.01814	-1.74376	-1.85321	-1.87792	-1.86557	0.0123554	-0.462689	-0.295934	-0.379312
31*		S	NEFM	4741		0.416937	0.37714	0.397039	-0.401167	-3.01408	-1.74248	-2.15799	-1.72595	-1.94197	0.216021	-0.46927	-0.334467	-0.401868
30*		S	LAMP1	3916		0.406076	0.389261	0.397668	-0.400479	-3.00917	-1.74094	-1.92257	-1.89919	-1.91088	0.0116915	-0.514829	-0.311432	-0.413131
71*		S	RP3-377H14.5	285830		0.423589	0.371867	0.397728	-0.400414	-3.0087	-1.7408	-1.82863	-1.75548	-1.79206	0.036578	-0.507198	-0.323698	-0.415448
8*		S	GPR34	2857		0.414257	0.387939	0.401098	-0.39675	-2.98257	-1.73256	-1.78386	-1.8844	-1.83413	0.0502707	-0.35076	-0.407389	-0.379075
31*		S	AIG1	51390		0.357332	0.448595	0.402963	-0.394734	-2.9682	-1.728	-2.21363	-1.67404	-1.94383	0.269796	-0.505619	-0.28949	-0.397554
40*		S	CALHM2	51063		0.443526	0.363592	0.403559	-0.394093	-2.96362	-1.72654	-1.68562	-1.99467	-1.84014	0.154525	-0.337415	-0.468905	-0.40316
26*		S	JRKL	8690		0.428295	0.387748	0.408021	-0.389317	-2.92956	-1.71563	-1.85905	-2.08894	-1.974	0.114943	-0.32335	-0.50806	-0.415705
56*		S	UPP2	151531		0.450618	0.365875	0.408247	-0.389078	-2.92785	-1.71508	-1.75378	-1.74871	-1.75124	0.00253207	-0.363685	-0.243849	-0.303767
13*		S	GATAD2B	57459		0.318267	0.498338	0.408303	-0.389018	-2.92743	-1.71495	-2.06315	-1.78867	-1.92591	0.137239	-0.515075	-0.378054	-0.446564
31*		S	NHLH2	4808		0.37407	0.445644	0.409857	-0.387368	-2.91566	-1.71115	-2.198	-1.67618	-1.93709	0.260913	-0.495411	-0.291348	-0.393379
12*		S	PPP2R3A	5523		0.529634	0.290183	0.409909	-0.387313	-2.91527	-1.71102	-1.73999	-1.78469	-1.76234	0.0223506	-0.556722	-0.285132	-0.420927
58*		S	FLJ23834	222256		0.453202	0.367322	0.410262	-0.386939	-2.9126	-1.71016	-1.73222	-2.07585	-1.90404	0.171818	-0.297789	-0.44509	-0.37144
18*		S	HDAC10	83933		0.458665	0.362382	0.410523	-0.386662	-2.91062	-1.70952	-2.07471	-2.3672	-2.22095	0.146244	-0.298	-0.494079	-0.39604
31*		S	NPTX2	4885		0.375319	0.446406	0.410863	-0.386303	-2.90807	-1.70869	-2.19684	-1.67563	-1.93623	0.260607	-0.49465	-0.290868	-0.392759
71*		S	OR6C74	254783		0.417144	0.405632	0.411388	-0.385748	-2.90411	-1.7074	-1.83464	-1.72779	-1.78122	0.0534226	-0.512976	-0.301012	-0.406994
34*		S	KIAA0586	9786		0.439193	0.385005	0.412099	-0.384998	-2.89876	-1.70567	-2.04109	-1.80933	-1.92521	0.115877	-0.459851	-0.314111	-0.386981
13*		S	TP53BP1	7158		0.272778	0.557234	0.415006	-0.381946	-2.87698	-1.69856	-2.10303	-1.73901	-1.92102	0.182013	-0.545432	-0.33594	-0.440686
43*		S	PCDHB7	56129		0.349774	0.481198	0.415486	-0.381444	-2.8734	-1.69739	-1.85215	-1.94396	-1.89806	0.045903	-0.280225	-0.467679	-0.373952
26*		S	FOXE1	2304		0.394681	0.44259	0.418635	-0.378164	-2.85001	-1.68969	-1.88908	-2.04219	-1.96563	0.0765534	-0.344909	-0.473607	-0.409258
13*		S	SIX6	4990		0.342366	0.497372	0.419869	-0.376886	-2.8409	-1.68667	-2.04202	-1.78949	-1.91576	0.126267	-0.498992	-0.378744	-0.438868
52*		S	CCDC102A	92922		0.457244	0.384202	0.420723	-0.376004	-2.83461	-1.68458	-1.69848	-1.81045	-1.75447	0.0559848	-0.304395	-0.260539	-0.282467
23*		S	SLC10A1	6554		0.362828	0.481969	0.422399	-0.374278	-2.82229	-1.68049	-1.53801	-1.79888	-1.66844	0.130435	-0.288502	-0.440935	-0.364719
38*		S	KLK13	26085		0.350713	0.495232	0.422972	-0.373688	-2.81809	-1.67908	-2.09823	-1.74588	-1.92205	0.176175	-0.508053	-0.277009	-0.392531
11*		S	PRDM5	11107		0.308138	0.538194	0.423166	-0.373489	-2.81667	-1.67861	-1.85281	-1.83852	-1.84567	0.00714625	-0.379283	-0.404842	-0.392062
52*		S	L3MBTL4	91133		0.368314	0.480304	0.424309	-0.372318	-2.80832	-1.67582	-1.76615	-1.73813	-1.75214	0.0140098	-0.361768	-0.211332	-0.28655
31*		S	ACCN3	9311		0.383082	0.465993	0.424538	-0.372084	-2.80665	-1.67526	-2.18959	-1.66139	-1.92549	0.264099	-0.489916	-0.278539	-0.384227
22*		S	TNFSF12	8742		0.495961	0.355374	0.425667	-0.37093	-2.79841	-1.67249	-1.68062	-2.17624	-1.92843	0.247813	-0.259598	-0.519233	-0.389415
18*		S	RAP1GAP	5909		0.395366	0.455974	0.42567	-0.370927	-2.7984	-1.67249	-2.1497	-2.26414	-2.20692	0.0572198	-0.336767	-0.436391	-0.386579
31*		S	AASDHPPT	60496		0.37068	0.480886	0.425783	-0.370812	-2.79757	-1.67221	-2.20117	-1.65057	-1.92587	0.275298	-0.497479	-0.269165	-0.383322
14*		S	ALDH3B1	221		0.487299	0.36585	0.426575	-0.370005	-2.79182	-1.67028	-1.97533	-1.84483	-1.91008	0.0652509	-0.613893	-0.34508	-0.479487
71*		S	LOC402436	402436		0.401032	0.452829	0.42693	-0.369643	-2.78924	-1.66941	-1.84965	-1.6891	-1.76937	0.0802769	-0.527421	-0.269301	-0.398361
38*		S	GPSM1	26086		0.43439	0.422531	0.428461	-0.368089	-2.77816	-1.66567	-2.02594	-1.80696	-1.91645	0.109489	-0.455302	-0.323809	-0.389556
39*		S	SLCO4A1	28231		0.404373	0.452711	0.428542	-0.368007	-2.77757	-1.66547	-2.15093	-1.78853	-1.96973	0.181201	-0.511062	-0.432664	-0.471863
25*		S	TMPRSS11E	28983		0.482918	0.377765	0.430341	-0.366187	-2.76459	-1.66107	-1.92042	-1.86505	-1.89273	0.0276825	-0.472477	-0.489948	-0.481213
70*		S	LOC400551	400551		0.430583	0.430764	0.430673	-0.365852	-2.7622	-1.66026	-1.68356	-1.83942	-1.76149	0.0779306	-0.223498	-0.404206	-0.313852
54*		S	LOC144766	144766		0.461493	0.400608	0.431051	-0.365472	-2.75949	-1.65933	-1.72202	-1.74935	-1.73568	0.0136666	-0.262583	-0.36089	-0.311737
23*		S	KRT10	3858		0.389398	0.475399	0.432399	-0.364116	-2.74982	-1.65604	-1.51871	-1.80447	-1.66159	0.142879	-0.267889	-0.44606	-0.356974
59*		S	ST6GALNAC3	256435		0.440261	0.425182	0.432721	-0.363792	-2.74751	-1.65525	-1.68213	-1.89099	-1.78656	0.104429	-0.358136	-0.453582	-0.405859
50*		S	DGAT2	84649		0.417736	0.448235	0.432986	-0.363527	-2.74562	-1.6546	-1.62705	-1.87328	-1.75017	0.123115	-0.274489	-0.391965	-0.333227
18*		S	RASAL2	9462		0.503866	0.364828	0.434347	-0.362163	-2.73589	-1.65128	-2.02116	-2.36451	-2.19283	0.171673	-0.270318	-0.492571	-0.381444
70*		S	LOC400602	400602		0.478136	0.392122	0.435129	-0.361382	-2.73032	-1.64936	-1.64861	-1.8726	-1.7606	0.111996	-0.197039	-0.431776	-0.314408
42*		S	CXorf48	54967		0.376258	0.500534	0.438396	-0.358133	-2.70715	-1.64138	-1.73416	-1.70685	-1.7205	0.0136565	-0.272034	-0.350138	-0.311086
37*		S	TBC1D30	23329		0.461009	0.417839	0.439424	-0.357116	-2.6999	-1.63886	-1.71642	-1.8849	-1.80066	0.0842409	-0.373069	-0.377646	-0.375357
22*		S	NR5A1	2516		0.4042	0.478223	0.441211	-0.355353	-2.68732	-1.63449	-1.75209	-2.05945	-1.90577	0.153679	-0.317621	-0.439263	-0.378442
31*		S	MIF4GD	57409		0.372307	0.510146	0.441227	-0.355338	-2.68722	-1.63446	-2.19965	-1.62931	-1.91448	0.285168	-0.496486	-0.250747	-0.373617
68*		S	LOC389687	389687		0.429167	0.461346	0.445256	-0.35139	-2.65905	-1.6246	-1.57996	-1.81435	-1.69715	0.117194	-0.287821	-0.263826	-0.275824
61*		S	PRAMEF9	343070		0.462184	0.428489	0.445337	-0.351312	-2.6585	-1.62441	-1.66603	-2.02708	-1.84655	0.180525	-0.425481	-0.556283	-0.490882
32*		S	RPL8	6132		0.371472	0.51971	0.445591	-0.351064	-2.65673	-1.62379	-1.90178	-1.9026	-1.90219	0.000410356	-0.481121	-0.382355	-0.431738
43*		S	VEZT	55591		0.496545	0.395511	0.446028	-0.350638	-2.65369	-1.62272	-1.73145	-2.01552	-1.87348	0.142039	-0.199483	-0.525439	-0.362461
71*		S	OR10AG1	282770		0.436659	0.455992	0.446325	-0.350348	-2.65162	-1.62199	-1.81646	-1.6865	-1.75148	0.0649779	-0.495481	-0.267175	-0.381328
63*		S	LOC440566	440566		0.389742	0.503091	0.446416	-0.35026	-2.65099	-1.62177	-1.93883	-1.91579	-1.92731	0.0115195	-0.456185	-0.416644	-0.436414
22*		S	DAP3	7818		0.397514	0.496057	0.446786	-0.349901	-2.64843	-1.62087	-1.7573	-2.0425	-1.8999	0.142598	-0.321849	-0.427653	-0.374751
9*		S	ROM1	6094		0.306779	0.586902	0.44684	-0.349847	-2.64805	-1.62073	-1.85102	-1.82911	-1.84007	0.0109574	-0.388935	-0.360044	-0.374489
41*		S	TMCO1	54499		0.421239	0.472719	0.446979	-0.349713	-2.64709	-1.62039	-1.85506	-1.79316	-1.82411	0.0309513	-0.464326	-0.239414	-0.35187
70*		S	LOC401895	401895		0.421125	0.473487	0.447306	-0.349395	-2.64483	-1.61959	-1.69051	-1.80273	-1.74662	0.0561127	-0.228761	-0.373724	-0.301243
64*		S	LOC284387	284387		0.501493	0.39568	0.448586	-0.348154	-2.63597	-1.61646	-1.98566	-1.79232	-1.88899	0.0966736	-0.417429	-0.283186	-0.350308
43*		S	VAC14	55697		0.421843	0.47673	0.449286	-0.347477	-2.63114	-1.61475	-1.79288	-1.94769	-1.87029	0.077404	-0.240578	-0.470691	-0.355635
37*		S	CEP68	23177		0.487487	0.411368	0.449427	-0.34734	-2.63017	-1.61441	-1.69437	-1.88985	-1.79211	0.0977374	-0.352675	-0.381408	-0.367041
21*		S	MIA	8190		0.487187	0.4118	0.449493	-0.347277	-2.62972	-1.61425	-1.73162	-1.78452	-1.75807	0.0264504	-0.336682	-0.296439	-0.31656
11*		S	SNAI1	6615		0.479967	0.419777	0.449872	-0.346911	-2.62711	-1.61332	-1.70114	-1.93954	-1.82034	0.119198	-0.259231	-0.489241	-0.374236
38*		S	BRI3	25798		0.493325	0.408394	0.45086	-0.345959	-2.62032	-1.61091	-1.97503	-1.81884	-1.89693	0.0780939	-0.418149	-0.332909	-0.375529
38*		S	FGFR1OP2	26127		0.436626	0.46541	0.451018	-0.345806	-2.61923	-1.61052	-2.02401	-1.77093	-1.89747	0.126538	-0.453893	-0.296206	-0.37505
41*		S	H2BFS	54145		0.485374	0.419414	0.452394	-0.344483	-2.60979	-1.60716	-1.80273	-1.83695	-1.81984	0.0171104	-0.418081	-0.26861	-0.343346
63*		S	FLJ45337	400754		0.492233	0.413622	0.452927	-0.343971	-2.60614	-1.60585	-1.84674	-1.98782	-1.91728	0.0705411	-0.382623	-0.472661	-0.427642
20*		S	TIRAP	114609		0.466976	0.438982	0.452979	-0.343922	-2.60579	-1.60573	-1.73119	-1.52602	-1.62861	0.102585	-0.242547	-0.199791	-0.221169
25*		S	CLIP3	25999		0.478161	0.428334	0.453248	-0.343665	-2.60395	-1.60507	-1.92452	-1.82277	-1.87364	0.0508767	-0.475887	-0.452001	-0.463944
32*		S	RPL17	6139		0.446887	0.460492	0.45369	-0.343241	-2.60094	-1.60399	-1.84157	-1.95186	-1.89671	0.0551439	-0.429326	-0.419184	-0.424255
43*		S	NECAP2	55707		0.39948	0.508917	0.454199	-0.342754	-2.59746	-1.60274	-1.81127	-1.92081	-1.86604	0.0547671	-0.25288	-0.448995	-0.350938
26*		S	FGF2	2247		0.529933	0.380729	0.455331	-0.341673	-2.58975	-1.59998	-1.76827	-2.09492	-1.9316	0.163328	-0.258161	-0.51247	-0.385316
42*		S	LGI2	55203		0.380827	0.530275	0.455551	-0.341463	-2.58825	-1.59944	-1.73088	-1.6817	-1.70629	0.0245887	-0.269501	-0.327293	-0.298397
23*		S	TRPM3	80036		0.49365	0.417509	0.45558	-0.341436	-2.58806	-1.59937	-1.44298	-1.85371	-1.64834	0.205364	-0.187007	-0.491217	-0.339112
21*		S	IL18R1	8809		0.496703	0.414603	0.455653	-0.341366	-2.58756	-1.59919	-1.72381	-1.78223	-1.75302	0.0292097	-0.329939	-0.294727	-0.312333
8*		S	ADRA1B	147		0.438438	0.472882	0.45566	-0.341359	-2.58751	-1.59917	-1.76312	-1.80816	-1.78564	0.0225174	-0.333653	-0.353785	-0.343719
27*		S	PAFAH1B1	5048		0.520655	0.394111	0.457383	-0.33972	-2.57582	-1.59496	-1.63176	-1.9743	-1.80303	0.171271	-0.18733	-0.383955	-0.285643
49*		S	DKFZp547F072	84234		0.444259	0.471791	0.458025	-0.339111	-2.57148	-1.59339	-1.83536	-1.65845	-1.7469	0.0884545	-0.251755	-0.345056	-0.298405
22*		S	NR2E3	10002		0.403388	0.512795	0.458091	-0.339048	-2.57103	-1.59323	-1.75273	-2.02658	-1.88966	0.13693	-0.318135	-0.416758	-0.367446
10*		S	DRG2	1819		0.245591	0.671806	0.458699	-0.338473	-2.56692	-1.59174	-1.92235	-1.77021	-1.84628	0.0760703	-0.429839	-0.315709	-0.372774
36*		S	POU6F2	11281		0.511826	0.406044	0.458935	-0.338249	-2.56533	-1.59116	-1.79212	-1.93047	-1.86129	0.0691725	-0.2872	-0.307448	-0.297324
9*		S	P2RY6	4160		0.321337	0.596926	0.459132	-0.338063	-2.564	-1.59068	-1.83955	-1.82015	-1.82985	0.00969978	-0.379707	-0.35296	-0.366333
11*		S	MCM3AP	8888		0.40145	0.519922	0.460686	-0.336595	-2.55353	-1.58688	-1.77045	-1.85411	-1.81228	0.0418303	-0.314088	-0.417865	-0.365977
64*		S	LRRC30	339291		0.505636	0.416394	0.461015	-0.336285	-2.55132	-1.58608	-1.98157	-1.77693	-1.87925	0.102324	-0.414483	-0.27198	-0.343232
68*		S	FLJ39051	399972		0.398045	0.525936	0.461991	-0.335367	-2.54477	-1.58369	-1.60152	-1.75963	-1.68058	0.0790514	-0.309225	-0.22663	-0.267927
37*		S	COTL1	23406		0.513137	0.411629	0.462383	-0.334998	-2.54214	-1.58273	-1.67302	-1.88965	-1.78133	0.108314	-0.332918	-0.381256	-0.357087
29*		S	ACCN1	160		0.516548	0.409201	0.462875	-0.334537	-2.53885	-1.58153	-1.634	-1.97281	-1.8034	0.169404	-0.154825	-0.560553	-0.357689
8*		S	GPR54	84634		0.45619	0.47049	0.46334	-0.3341	-2.53574	-1.5804	-1.74789	-1.8103	-1.7791	0.0312041	-0.321093	-0.355294	-0.338194
34*		S	HOMER2	9455		0.511828	0.415466	0.463647	-0.333813	-2.53369	-1.57964	-1.98021	-1.7854	-1.8828	0.0974048	-0.415796	-0.296307	-0.356051
39*		S	NFU1	27247		0.534065	0.395865	0.464965	-0.33258	-2.52489	-1.57642	-2.02907	-1.83405	-1.93156	0.0975125	-0.42608	-0.474568	-0.450324
44*		S	WRNIP1	56897		0.479149	0.451967	0.465558	-0.332026	-2.52095	-1.57497	-2.23455	-1.87638	-2.05547	0.179084	-0.649177	-0.319943	-0.48456
23*		S	NPHP1	4867		0.42197	0.509976	0.465973	-0.331639	-2.51819	-1.57396	-1.49505	-1.77506	-1.63505	0.140005	-0.242618	-0.419089	-0.330854
37*		S	TNRC6B	23112		0.449727	0.482442	0.466085	-0.331535	-2.51745	-1.57369	-1.72581	-1.83548	-1.78064	0.0548336	-0.381758	-0.340089	-0.360924
58*		S	SLC35F1	222553		0.539979	0.39224	0.46611	-0.331512	-2.51728	-1.57362	-1.65613	-2.05484	-1.85549	0.199355	-0.236105	-0.430711	-0.333408
37*		S	GARNL4	23108		0.544723	0.387955	0.466339	-0.331298	-2.51576	-1.57306	-1.64673	-1.90776	-1.77724	0.130517	-0.30859	-0.395019	-0.351804
31*		S	AARS2	57505		0.424612	0.509134	0.466873	-0.330801	-2.51221	-1.57176	-2.15083	-1.63005	-1.89044	0.26039	-0.464589	-0.251384	-0.357987
11*		S	PCDHA4	56144		0.246784	0.68718	0.466982	-0.3307	-2.51149	-1.57149	-1.90697	-1.71143	-1.8092	0.0977708	-0.422149	-0.298655	-0.360402
30*		S	FADS1	3992		0.506693	0.428947	0.46782	-0.329921	-2.50593	-1.56944	-1.83701	-1.86542	-1.85122	0.0142041	-0.440288	-0.288944	-0.364616
37*		S	GLT25D2	23127		0.482921	0.453503	0.468212	-0.329557	-2.50334	-1.56848	-1.69817	-1.85761	-1.77789	0.0797198	-0.356192	-0.356913	-0.356552
43*		S	C14orf106	55320		0.448846	0.488056	0.468451	-0.329336	-2.50176	-1.5679	-1.77067	-1.93823	-1.85445	0.0837781	-0.225723	-0.463057	-0.34439
43*		S	AGPAT5	55326		0.538105	0.399008	0.468556	-0.329238	-2.50106	-1.56764	-1.69727	-2.0126	-1.85493	0.157668	-0.17662	-0.523082	-0.349851
39*		S	DNTTIP2	30836		0.419513	0.519812	0.469662	-0.328214	-2.49376	-1.56494	-2.13671	-1.7348	-1.93575	0.200955	-0.501141	-0.3832	-0.44217
70*		S	LOC400577	400577		0.496967	0.4425	0.469734	-0.328148	-2.49329	-1.56476	-1.63477	-1.82934	-1.73205	0.0972873	-0.186562	-0.395833	-0.291197
23*		S	NEB	4703		0.402605	0.537283	0.469944	-0.327954	-2.4919	-1.56425	-1.50912	-1.75183	-1.63047	0.121358	-0.257642	-0.397788	-0.327715
49*		S	FBXW9	84261		0.45467	0.488538	0.471604	-0.326423	-2.48098	-1.56019	-1.82652	-1.64551	-1.73602	0.0905072	-0.246067	-0.332542	-0.289304
14*		S	ABHD6	57406		0.450741	0.493104	0.471923	-0.326129	-2.47889	-1.55941	-2.0061	-1.75024	-1.87817	0.127929	-0.642374	-0.274274	-0.458324
34*		S	CYTIP	9595		0.475597	0.468443	0.47202	-0.32604	-2.47825	-1.55918	-2.01057	-1.74377	-1.87717	0.133402	-0.437771	-0.265342	-0.351556
31*		S	ALLC	55821		0.411847	0.532651	0.472249	-0.325829	-2.47675	-1.55862	-2.16274	-1.61296	-1.88785	0.274891	-0.472374	-0.236582	-0.354478
59*		S	LOC283585	283585		0.543813	0.402399	0.473106	-0.325042	-2.47113	-1.55652	-1.59897	-1.90941	-1.75419	0.155224	-0.278843	-0.468716	-0.37378
21*		S	KLRA1	10748		0.442631	0.505323	0.473977	-0.324243	-2.46543	-1.55439	-1.76818	-1.70809	-1.73814	0.0300486	-0.368255	-0.239336	-0.303796
22*		S	NPPA	4878		0.537165	0.412689	0.474927	-0.323373	-2.45923	-1.55207	-1.64852	-2.12175	-1.88514	0.236617	-0.233543	-0.481923	-0.357733
26*		S	C12orf47	51275		0.486736	0.463448	0.475092	-0.323222	-2.45816	-1.55166	-1.80685	-2.0244	-1.91563	0.108776	-0.285867	-0.460504	-0.373185
63*		S	LOC130839	130839		0.433342	0.517599	0.475471	-0.322876	-2.45569	-1.55074	-1.89965	-1.90411	-1.90188	0.0022277	-0.424891	-0.40756	-0.416226
68*		S	LOC399707	399707		0.556408	0.396609	0.476509	-0.321929	-2.44893	-1.5482	-1.49179	-1.86919	-1.68049	0.188701	-0.20031	-0.301107	-0.250709
59*		S	CTAGE1	64693		0.50891	0.444138	0.476524	-0.321915	-2.44883	-1.54816	-1.627	-1.87566	-1.75133	0.124331	-0.305569	-0.440991	-0.37328
42*		S	RNF121	55298		0.402921	0.550244	0.476583	-0.321862	-2.44845	-1.54802	-1.71503	-1.66482	-1.68992	0.025103	-0.257254	-0.311954	-0.284604
34*		S	SEC14L5	9717		0.511487	0.441719	0.476603	-0.321843	-2.44832	-1.54797	-1.98049	-1.76477	-1.87263	0.107862	-0.416003	-0.280962	-0.348482
25*		S	E2F5	1875		0.555309	0.398394	0.476851	-0.321617	-2.4467	-1.54736	-1.85798	-1.8478	-1.85289	0.00508799	-0.420581	-0.474468	-0.447525
37*		S	KIAA1045	23349		0.543708	0.410177	0.476942	-0.321534	-2.44611	-1.54714	-1.64757	-1.89076	-1.76916	0.121595	-0.309372	-0.3821	-0.345736
70*		S	DKFZp686L21136	400677		0.495932	0.458231	0.477081	-0.321407	-2.44521	-1.5468	-1.63553	-1.81583	-1.72568	0.0901531	-0.187138	-0.384609	-0.285873
36*		S	DDX19B	11269		0.536353	0.417924	0.477139	-0.321356	-2.44484	-1.54666	-1.77218	-1.92042	-1.8463	0.0741205	-0.272566	-0.301087	-0.286826
33*		S	ELL	8178		0.440829	0.514697	0.477763	-0.320787	-2.44079	-1.54514	-1.94212	-1.87304	-1.90758	0.0345375	-0.468943	-0.239201	-0.354072
31*		S	NCKIPSD	51517		0.48495	0.47179	0.47837	-0.320236	-2.43686	-1.54365	-2.09451	-1.65718	-1.87585	0.218664	-0.427793	-0.27489	-0.351342
42*		S	PLEKHJ1	55111		0.487811	0.469967	0.478889	-0.319765	-2.4335	-1.54238	-1.65412	-1.73269	-1.6934	0.0392853	-0.210196	-0.373618	-0.291907
21*		S	CSHL1	1444		0.514598	0.443761	0.479179	-0.319502	-2.43162	-1.54167	-1.70912	-1.7584	-1.73376	0.0246377	-0.317258	-0.276924	-0.297091
22*		S	LDLR	3949		0.522716	0.43795	0.480333	-0.318458	-2.42417	-1.53885	-1.65977	-2.09774	-1.87876	0.218982	-0.242679	-0.465479	-0.354079
19*		S	USP33	23032		0.436174	0.524837	0.480505	-0.318302	-2.42306	-1.53843	-1.87183	-1.6717	-1.77177	0.100068	-0.343571	-0.247358	-0.295464
34*		S	SYNGR3	9143		0.411831	0.549674	0.480753	-0.318078	-2.42147	-1.53783	-2.06402	-1.67994	-1.87198	0.192038	-0.476447	-0.217862	-0.347155
31*		S	NMT1	4836		0.518746	0.442985	0.480866	-0.317976	-2.42074	-1.53755	-2.06297	-1.67811	-1.87054	0.192428	-0.407183	-0.293021	-0.350102
57*		S	ZFC3H1	196441		0.52731	0.434762	0.481036	-0.317822	-2.41964	-1.53713	-2.09429	-1.71074	-1.90251	0.191776	-0.49331	-0.363208	-0.428259
47*		S	MORN1	79906		0.431537	0.531094	0.481316	-0.31757	-2.41784	-1.53645	-1.89016	-1.55334	-1.72175	0.168409	-0.306387	-0.205489	-0.255938
49*		S	RILP	83547		0.478724	0.484202	0.481463	-0.317437	-2.41689	-1.53609	-1.80611	-1.64886	-1.72749	0.078626	-0.232924	-0.335782	-0.284353
61*		S	SMTNL2	342527		0.482742	0.480444	0.481593	-0.31732	-2.41606	-1.53577	-1.65002	-1.98078	-1.8154	0.165382	-0.408906	-0.51791	-0.463408
18*		S	RGL4	266747		0.502634	0.460707	0.481671	-0.31725	-2.41556	-1.53558	-2.02262	-2.25893	-2.14078	0.118158	-0.271072	-0.433473	-0.352273
41*		S	CRLS1	54675		0.434132	0.530599	0.482366	-0.316624	-2.41109	-1.53388	-1.84454	-1.74562	-1.79508	0.0494614	-0.455029	-0.207711	-0.33137
9*		S	TACR1	5739		0.47395	0.492457	0.483204	-0.31587	-2.40572	-1.53183	-1.71928	-1.9135	-1.81639	0.0971089	-0.282971	-0.426792	-0.354882
31*		S	MT1B	4490		0.480965	0.486358	0.483662	-0.315458	-2.40278	-1.53071	-2.09823	-1.6466	-1.87241	0.225816	-0.430223	-0.26572	-0.347972
35*		S	POM121	9883		0.539627	0.428278	0.483953	-0.315197	-2.40092	-1.53	-1.66662	-1.98516	-1.82589	0.159272	-0.216361	-0.689472	-0.452917
30*		S	GNA12	2768		0.525547	0.44241	0.483978	-0.315174	-2.40075	-1.52994	-1.82098	-1.85397	-1.83748	0.0164929	-0.426321	-0.281316	-0.353818
71*		S	LOC389901	389901		0.513377	0.454698	0.484038	-0.315121	-2.40037	-1.5298	-1.74498	-1.68756	-1.71627	0.0287107	-0.426702	-0.268045	-0.347373
21*		S	ITGA3	3675		0.510766	0.458402	0.484584	-0.314631	-2.39688	-1.52846	-1.71227	-1.74643	-1.72935	0.0170826	-0.319974	-0.267985	-0.293979
32*		S	SLC4A2	6522		0.419113	0.551145	0.485129	-0.314143	-2.3934	-1.52713	-1.86374	-1.87645	-1.8701	0.00635299	-0.448401	-0.362805	-0.405603
59*		S	C14orf178	283579		0.495369	0.482648	0.489009	-0.310684	-2.36873	-1.51764	-1.63787	-1.84451	-1.74119	0.103321	-0.315938	-0.415411	-0.365674
9*		S	MC1R	4882		0.37348	0.605116	0.489298	-0.310427	-2.36689	-1.51694	-1.79846	-1.81283	-1.80565	0.00718667	-0.346655	-0.347171	-0.346913
49*		S	DCUN1D5	84259		0.445974	0.533335	0.489654	-0.31011	-2.36464	-1.51606	-1.8339	-1.6109	-1.7224	0.111504	-0.250818	-0.299067	-0.274943
30*		S	GPM6A	2823		0.45039	0.528953	0.489671	-0.310095	-2.36453	-1.51602	-1.88489	-1.78034	-1.83261	0.0522742	-0.482	-0.232276	-0.357138
29*		S	DOM3Z	1797		0.438464	0.542028	0.490246	-0.309586	-2.3609	-1.51462	-1.69429	-1.84884	-1.77157	0.0772751	-0.197116	-0.452514	-0.324815
59*		S	C14orf48	256369		0.523439	0.457408	0.490424	-0.309429	-2.35978	-1.51418	-1.61533	-1.86493	-1.74013	0.124799	-0.294444	-0.432176	-0.36331
41*		S	MED15	51586		0.410316	0.570782	0.490549	-0.309318	-2.35898	-1.51388	-1.86398	-1.71261	-1.7883	0.0756822	-0.472202	-0.185702	-0.328952
68*		S	LOC387716	387716		0.543865	0.437277	0.490571	-0.309298	-2.35884	-1.51382	-1.50048	-1.83474	-1.66761	0.167129	-0.208937	-0.277687	-0.243312
63*		S	TRIM14	9830		0.559168	0.422114	0.490641	-0.309236	-2.3584	-1.51365	-1.7866	-1.98099	-1.88379	0.0971934	-0.334582	-0.467344	-0.400963
28*		S	SERTAD1	29950		0.557064	0.424344	0.490704	-0.30918	-2.35801	-1.5135	-1.60364	-1.8193	-1.71147	0.107833	-0.249379	-0.306507	-0.277943
51*		S	KRTAP4-2	85291		0.573808	0.408042	0.490925	-0.308985	-2.35661	-1.51296	-1.77756	-2.23545	-2.00651	0.228948	-0.250494	-0.55169	-0.401092
47*		S	FAM57A	79850		0.579557	0.403063	0.49131	-0.308644	-2.35418	-1.51202	-1.76636	-1.64672	-1.70654	0.0598216	-0.224674	-0.28793	-0.256302
23*		S	DMD	1756		0.486001	0.497223	0.491612	-0.308378	-2.35228	-1.51128	-1.44853	-1.78591	-1.61722	0.168685	-0.192942	-0.429037	-0.310989
61*		S	LIN9	286826		0.519561	0.463873	0.491717	-0.308285	-2.35162	-1.51102	-1.62135	-1.99555	-1.80845	0.1871	-0.37922	-0.530149	-0.454685
29*		S	CAD	744		0.42876	0.55479	0.491775	-0.308234	-2.35125	-1.51088	-1.70178	-1.83693	-1.76936	0.0675733	-0.202372	-0.442134	-0.322253
13*		S	SUB1	10923		0.442322	0.542048	0.492185	-0.307872	-2.34867	-1.50988	-1.95438	-1.75182	-1.8531	0.101284	-0.432287	-0.346799	-0.389543
38*		S	KIAA1279	26128		0.413766	0.570888	0.492327	-0.307746	-2.34778	-1.50953	-2.04376	-1.68231	-1.86303	0.180725	-0.468304	-0.228307	-0.348305
40*		S	FAM135B	51059		0.566656	0.418206	0.492431	-0.307655	-2.34712	-1.50928	-1.58874	-1.94718	-1.76796	0.179222	-0.249234	-0.432734	-0.340984
13*		S	TP73	7161		0.45587	0.52931	0.49259	-0.307514	-2.34612	-1.50889	-1.9425	-1.76256	-1.85253	0.0899738	-0.423245	-0.355907	-0.389576
47*		S	ISOC2	79763		0.508248	0.476964	0.492606	-0.3075	-2.34602	-1.50885	-1.826	-1.59282	-1.70941	0.116591	-0.264039	-0.240344	-0.252192
68*		S	LOC402587	402587		0.52797	0.458128	0.493049	-0.30711	-2.34324	-1.50776	-1.51149	-1.81707	-1.66428	0.15279	-0.219869	-0.265679	-0.242774
36*		S	AP4B1	10717		0.518924	0.468117	0.49352	-0.306695	-2.34028	-1.50661	-1.78635	-1.87798	-1.83216	0.0458143	-0.282965	-0.27421	-0.278588
61*		S	MOGAT3	346606		0.506059	0.481608	0.493833	-0.306419	-2.33831	-1.50585	-1.63186	-1.97974	-1.8058	0.173942	-0.390106	-0.51705	-0.453578
37*		S	SMC5	23137		0.548231	0.439445	0.493838	-0.306415	-2.33829	-1.50584	-1.6438	-1.86837	-1.75609	0.112282	-0.305888	-0.365085	-0.335487
71*		S	LOC286467	286467		0.501928	0.486917	0.494422	-0.305902	-2.33462	-1.50441	-1.75565	-1.66115	-1.7084	0.0472525	-0.436966	-0.246397	-0.341682
8*		S	CCR5	1234		0.514915	0.476945	0.49593	-0.30458	-2.32519	-1.50072	-1.69752	-1.80451	-1.75102	0.053492	-0.279546	-0.351221	-0.315383
31*		S	ABCG4	64137		0.505345	0.486904	0.496125	-0.304409	-2.32398	-1.50025	-2.07547	-1.6462	-1.86084	0.214637	-0.415356	-0.265377	-0.340366
33*		S	LST1	7940		0.560105	0.433304	0.496704	-0.303902	-2.32036	-1.49883	-1.83865	-1.94483	-1.89174	0.0530907	-0.385094	-0.28184	-0.333467
18*		S	REXO4	57109		0.549028	0.444886	0.496957	-0.303681	-2.31878	-1.49821	-1.96765	-2.27635	-2.122	0.154351	-0.242659	-0.443225	-0.342942
22*		S	MED26	9441		0.443773	0.55047	0.497121	-0.303537	-2.31776	-1.49781	-1.72127	-1.99077	-1.85602	0.13475	-0.292598	-0.392233	-0.342415
40*		S	PRLH	51052		0.57418	0.420319	0.49725	-0.303426	-2.31696	-1.4975	-1.58282	-1.94534	-1.76408	0.181263	-0.243846	-0.431335	-0.33759
21*		S	GDF1	2657		0.531699	0.464448	0.498074	-0.302707	-2.31183	-1.49548	-1.69509	-1.74149	-1.71829	0.0232015	-0.30514	-0.264293	-0.284717
59*		S	C11orf36	283303		0.555714	0.440631	0.498173	-0.30262	-2.31122	-1.49524	-1.58941	-1.87849	-1.73395	0.144543	-0.269731	-0.44332	-0.356525
70*		S	LOC388791	388791		0.482526	0.513896	0.498211	-0.302587	-2.31098	-1.49515	-1.64538	-1.76803	-1.70671	0.061328	-0.194597	-0.344893	-0.269745
45*		S	KIAA1546	57667		0.471034	0.525444	0.498239	-0.302562	-2.3108	-1.49508	-1.7573	-1.70629	-1.73179	0.025506	-0.458542	-0.163665	-0.311104
44*		S	ANKS1B	56899		0.585116	0.412397	0.498756	-0.302111	-2.30759	-1.49381	-2.12188	-1.90819	-2.01503	0.106845	-0.563018	-0.3421	-0.452559
22*		S	PLRG1	5356		0.553852	0.443726	0.498789	-0.302083	-2.30739	-1.49373	-1.63552	-2.09225	-1.86388	0.228363	-0.222991	-0.461719	-0.342355
56*		S	TTC39B	158219		0.526995	0.471586	0.499291	-0.301647	-2.30427	-1.49251	-1.69163	-1.66425	-1.67794	0.0136894	-0.309409	-0.18502	-0.247214
40*		S	KLK14	43847		0.555688	0.442967	0.499327	-0.301615	-2.30404	-1.49242	-1.59737	-1.92565	-1.76151	0.164143	-0.257089	-0.416335	-0.336712
58*		S	ATP6V0D2	245972		0.565997	0.433925	0.499961	-0.301064	-2.30012	-1.49087	-1.63332	-2.01969	-1.8265	0.193186	-0.217611	-0.406655	-0.312133
50*		S	PPAPDC3	84814		0.513647	0.487072	0.500359	-0.300718	-2.29765	-1.48989	-1.55158	-1.83939	-1.69548	0.143903	-0.206826	-0.365286	-0.286056
45*		S	SELK	58515		0.61627	0.385017	0.500644	-0.300471	-2.29589	-1.4892	-1.64368	-1.82945	-1.73657	0.0928831	-0.34625	-0.242142	-0.294196
37*		S	PUM2	23369		0.577788	0.424417	0.501103	-0.300073	-2.29305	-1.48808	-1.6192	-1.87987	-1.74953	0.130333	-0.283123	-0.373822	-0.328472
59*		S	NUDT14	256281		0.557961	0.44456	0.50126	-0.299937	-2.29208	-1.48769	-1.5876	-1.87532	-1.73146	0.143857	-0.26801	-0.440711	-0.35436
15*		S	PDE3B	5140		0.385083	0.617737	0.50141	-0.299807	-2.29115	-1.48732	-1.93447	-1.64018	-1.78732	0.147146	-0.424782	-0.219506	-0.322144
51*		S	SAAL1	113174		0.563477	0.439475	0.501476	-0.29975	-2.29074	-1.48716	-1.78751	-2.20268	-1.99509	0.207586	-0.257437	-0.529648	-0.393543
49*		S	MGC3207	84245		0.507076	0.49646	0.501768	-0.299497	-2.28894	-1.48645	-1.78205	-1.63939	-1.71072	0.071332	-0.217433	-0.326622	-0.272027
61*		S	C2orf55	343990		0.524568	0.479494	0.502031	-0.299269	-2.28732	-1.48581	-1.61745	-1.98163	-1.79954	0.18209	-0.375183	-0.518612	-0.446897
14*		S	GAPDH	2597		0.536215	0.468018	0.502116	-0.299196	-2.28679	-1.4856	-1.93417	-1.76888	-1.85152	0.0826409	-0.575785	-0.288232	-0.432009
68*		S	LOC387654	387654		0.411493	0.592973	0.502233	-0.299095	-2.28607	-1.48531	-1.59221	-1.70284	-1.64752	0.055315	-0.299976	-0.188024	-0.244
71*		S	OR2T6	254879		0.549899	0.456503	0.503201	-0.298259	-2.28011	-1.48295	-1.71096	-1.68608	-1.69852	0.0124381	-0.393959	-0.266832	-0.330396
36*		S	LASS1	10715		0.530335	0.476141	0.503238	-0.298227	-2.27988	-1.48286	-1.77707	-1.87119	-1.82413	0.0470607	-0.276156	-0.269914	-0.273035
40*		S	EIF3EIP	51386		0.583376	0.423126	0.503251	-0.298215	-2.2798	-1.48282	-1.57558	-1.9429	-1.75924	0.183661	-0.23726	-0.429476	-0.333368
27*		S	C18orf8	29919		0.59193	0.415324	0.503627	-0.297891	-2.27749	-1.4819	-1.57408	-1.95233	-1.7632	0.189126	-0.143294	-0.36874	-0.256017
58*		S	RFX6	222546		0.57205	0.435456	0.503753	-0.297782	-2.27671	-1.4816	-1.62801	-2.0184	-1.82321	0.195194	-0.213309	-0.405772	-0.30954
69*		S	LOC387898	387898		0.619434	0.388401	0.503918	-0.297641	-2.2757	-1.48119	-1.71454	-2.21091	-1.96273	0.248181	-0.350803	-0.583571	-0.467187
34*		S	DEPDC5	9681		0.510767	0.497105	0.503936	-0.297625	-2.27559	-1.48115	-1.9811	-1.72125	-1.85117	0.129924	-0.416439	-0.248589	-0.332514
32*		S	SULT1A3	6818		0.458998	0.549185	0.504092	-0.297491	-2.27463	-1.48077	-1.8319	-1.87808	-1.85499	0.0230892	-0.421008	-0.364024	-0.392516
31*		S	ALG12	79087		0.479307	0.529547	0.504427	-0.297202	-2.27257	-1.47995	-2.09978	-1.61522	-1.8575	0.24228	-0.431234	-0.238536	-0.334885
15*		S	GPHN	10243		0.423327	0.58573	0.504529	-0.297114	-2.27195	-1.4797	-1.89927	-1.66486	-1.78206	0.117202	-0.397662	-0.239372	-0.318517
43*		S	KBTBD4	55709		0.588295	0.422668	0.505482	-0.296295	-2.2661	-1.47737	-1.65599	-1.99284	-1.82442	0.168426	-0.14901	-0.507133	-0.328072
41*		S	ESF1	51575		0.49451	0.517486	0.505998	-0.295851	-2.26294	-1.47611	-1.79527	-1.75639	-1.77583	0.0194394	-0.411494	-0.214894	-0.313194
52*		S	LOC93432	93432		0.497287	0.515914	0.506601	-0.295334	-2.25925	-1.47464	-1.66801	-1.71134	-1.68967	0.0216603	-0.278561	-0.193098	-0.23583
28*		S	RPS16	6217		0.592448	0.422241	0.507344	-0.294697	-2.25471	-1.47282	-1.57748	-1.82096	-1.69922	0.121739	-0.22583	-0.307698	-0.266764
25*		S	CPNE5	57699		0.49158	0.52418	0.50788	-0.294239	-2.25144	-1.47151	-1.91294	-1.74262	-1.82778	0.0851622	-0.466268	-0.380077	-0.423172
65*		S	OR13C5	138799		0.594536	0.421409	0.507973	-0.29416	-2.25087	-1.47128	-1.66764	-1.77326	-1.72045	0.052808	-0.358306	-0.218128	-0.288217
46*		S	GDAP1L1	78997		0.436519	0.579601	0.50806	-0.294085	-2.25034	-1.47107	-1.7099	-1.61295	-1.66142	0.0484749	-0.206079	-0.240766	-0.223422
38*		S	PTPN20B	26095		0.523081	0.493401	0.508241	-0.29393	-2.24924	-1.47062	-1.94932	-1.74741	-1.84837	0.100954	-0.399391	-0.278188	-0.338789
30*		S	FGL1	2267		0.460872	0.556349	0.50861	-0.293615	-2.24699	-1.46972	-1.87598	-1.75703	-1.8165	0.0594716	-0.474234	-0.216753	-0.345493
15*		S	GSTO1	9446		0.424906	0.592341	0.508624	-0.293604	-2.24691	-1.46969	-1.89781	-1.65976	-1.77879	0.119024	-0.396543	-0.235269	-0.315906
28*		S	RBMS3	27303		0.552012	0.465739	0.508876	-0.293388	-2.24537	-1.46907	-1.60737	-1.78662	-1.697	0.089628	-0.252741	-0.283051	-0.267896
15*		S	SAT1	6303		0.545124	0.47321	0.509167	-0.29314	-2.2436	-1.46836	-1.78715	-1.75164	-1.7694	0.017755	-0.311295	-0.309209	-0.310252
52*		S	HNRPLL	92906		0.500772	0.51763	0.509201	-0.293111	-2.24339	-1.46828	-1.66536	-1.71004	-1.6877	0.0223406	-0.276312	-0.19222	-0.234266
42*		S	KIRREL	55243		0.529442	0.489046	0.509244	-0.293074	-2.24313	-1.46817	-1.62424	-1.71656	-1.6704	0.0461563	-0.187118	-0.358963	-0.27304
46*		S	CUEDC2	79004		0.41833	0.600614	0.509472	-0.29288	-2.24174	-1.46762	-1.72379	-1.59666	-1.66022	0.0635633	-0.215833	-0.226569	-0.221201
53*		S	HIGD2BP	123346		0.599105	0.420035	0.50957	-0.292796	-2.24115	-1.46738	-1.63839	-2.05265	-1.84552	0.207131	-0.294362	-0.468297	-0.38133
62*		S	IQCF2	389123		0.527897	0.491351	0.509624	-0.29275	-2.24082	-1.46724	-1.62246	-1.76296	-1.69271	0.0702517	-0.275022	-0.405468	-0.340245
65*		S	LOC340501	340501		0.577565	0.441817	0.509691	-0.292693	-2.24041	-1.46708	-1.682	-1.75616	-1.71908	0.0370811	-0.372282	-0.207007	-0.289645
55*		S	SYT6	148281		0.591345	0.429612	0.510478	-0.292023	-2.23563	-1.46515	-1.82724	-1.78775	-1.80749	0.0197451	-0.289987	-0.257486	-0.273737
31*		S	HEATR6	63897		0.579476	0.443738	0.511607	-0.291064	-2.22879	-1.4624	-2.00628	-1.67756	-1.84192	0.164359	-0.370148	-0.292547	-0.331348
20*		S	SFRP4	6424		0.422527	0.600984	0.511756	-0.290937	-2.22789	-1.46203	-1.76711	-1.41295	-1.59003	0.177084	-0.268873	-0.094069	-0.181471
42*		S	WDR41	55255		0.474397	0.549947	0.512172	-0.290584	-2.22537	-1.46101	-1.66374	-1.66507	-1.66441	0.00066554	-0.217632	-0.312182	-0.264907
31*		S	OGN	4969		0.549977	0.475409	0.512693	-0.290143	-2.22222	-1.45974	-2.03382	-1.65455	-1.84418	0.189631	-0.388138	-0.272612	-0.330375
50*		S	ST6GAL2	84620		0.453517	0.57315	0.513333	-0.2896	-2.21836	-1.45817	-1.5989	-1.76427	-1.68158	0.0826851	-0.249246	-0.306156	-0.277701
43*		S	LYAR	55646		0.403102	0.623826	0.513464	-0.28949	-2.21757	-1.45786	-1.80829	-1.82484	-1.81657	0.00827096	-0.250888	-0.371538	-0.311213
25*		S	CTNNBL1	56259		0.563891	0.463466	0.513679	-0.289309	-2.21627	-1.45733	-1.85057	-1.79339	-1.82198	0.0285931	-0.414429	-0.425638	-0.420033
68*		S	FAM90A3	389611		0.558895	0.468955	0.513925	-0.2891	-2.21479	-1.45673	-1.49006	-1.8079	-1.64898	0.158918	-0.1986	-0.259444	-0.229022
31*		S	AFTPH	54812		0.509664	0.520672	0.515168	-0.288051	-2.20731	-1.45369	-2.07144	-1.62167	-1.84655	0.224888	-0.412722	-0.244122	-0.328422
66*		S	LOC389173	389173		0.527543	0.50296	0.515251	-0.287981	-2.2068	-1.45349	-1.70511	-1.75031	-1.72771	0.0225983	-0.386411	-0.364925	-0.375668
40*		S	POMP	51371		0.576196	0.455354	0.515775	-0.28754	-2.20366	-1.45221	-1.58123	-1.91488	-1.74806	0.166826	-0.242402	-0.408132	-0.325267
28*		S	RBBP8	5932		0.57915	0.454098	0.516624	-0.286825	-2.19856	-1.45013	-1.58731	-1.79581	-1.69156	0.104251	-0.234681	-0.289647	-0.262164
20*		S	SEMA3A	10371		0.476856	0.559785	0.51832	-0.285402	-2.18841	-1.44598	-1.72321	-1.4417	-1.58245	0.140752	-0.236696	-0.120955	-0.178825
32*		S	RPL9	6133		0.524148	0.513255	0.518702	-0.285082	-2.18613	-1.44505	-1.77989	-1.90797	-1.84393	0.0640393	-0.376262	-0.386369	-0.381316
38*		S	CCDC69	26112		0.586938	0.450905	0.518922	-0.284898	-2.18482	-1.44451	-1.89416	-1.78312	-1.83864	0.055519	-0.359135	-0.305544	-0.332339
59*		S	NPB	256933		0.587233	0.452242	0.519737	-0.284216	-2.17995	-1.44252	-1.56409	-1.8691	-1.7166	0.152505	-0.245596	-0.435608	-0.340602
44*		S	CHST7	56548		0.603844	0.436676	0.52026	-0.28378	-2.17684	-1.44124	-2.10196	-1.88867	-1.99532	0.106646	-0.54779	-0.328505	-0.438148
45*		S	RRAGC	64121		0.550165	0.490448	0.520307	-0.283741	-2.17656	-1.44113	-1.6954	-1.73698	-1.71619	0.0207924	-0.397361	-0.183222	-0.290291
59*		S	UNQ2963	283314		0.605103	0.435697	0.5204	-0.283663	-2.17601	-1.4409	-1.54974	-1.88249	-1.71611	0.166371	-0.231912	-0.446598	-0.339255
21*		S	GFRA3	2676		0.611737	0.429732	0.520734	-0.283384	-2.17402	-1.44008	-1.62941	-1.76986	-1.69963	0.0702295	-0.248425	-0.28549	-0.266957
15*		S	TPMT	7172		0.451432	0.590485	0.520958	-0.283197	-2.17268	-1.43953	-1.8734	-1.6612	-1.7673	0.1061	-0.377733	-0.236421	-0.307077
17*		S	PCM1	5108		0.592254	0.449663	0.520958	-0.283197	-2.17268	-1.43953	-1.87037	-1.83781	-1.85409	0.0162789	-0.405703	-0.360406	-0.383055
50*		S	ZNF577	84765		0.571084	0.470921	0.521003	-0.28316	-2.17242	-1.43943	-1.50639	-1.85348	-1.67993	0.173548	-0.166306	-0.376381	-0.271344
9*		S	TAS1R1	10267		0.327137	0.715228	0.521182	-0.28301	-2.17135	-1.43899	-1.83498	-1.71444	-1.77471	0.0602702	-0.376031	-0.26935	-0.32269
63*		S	ARR3	407		0.582415	0.461016	0.521715	-0.282566	-2.16819	-1.43768	-1.76571	-1.94967	-1.85769	0.091977	-0.317897	-0.442987	-0.380442
43*		S	TSR1	55720		0.605527	0.438205	0.521866	-0.282441	-2.16729	-1.43732	-1.64182	-1.97987	-1.81084	0.169024	-0.139531	-0.49666	-0.318095
37*		S	PDZD2	23037		0.530875	0.514193	0.522534	-0.281885	-2.16333	-1.43568	-1.65825	-1.81119	-1.73472	0.0764659	-0.319256	-0.321631	-0.320443
71*		S	LOC401628	401628		0.519836	0.525538	0.522687	-0.281758	-2.16242	-1.43531	-1.73897	-1.62948	-1.68422	0.0547438	-0.420911	-0.220448	-0.32068
21*		S	FGF20	26281		0.530095	0.515291	0.522693	-0.281753	-2.16239	-1.43529	-1.69641	-1.69994	-1.69817	0.00176733	-0.306277	-0.23325	-0.269764
54*		S	HEATR7B2	133558		0.474048	0.571947	0.522998	-0.2815	-2.16058	-1.43455	-1.7117	-1.62486	-1.66828	0.0434193	-0.254614	-0.252054	-0.253334
51*		S	MST150	85027		0.509062	0.537217	0.523139	-0.281382	-2.15974	-1.4342	-1.8399	-2.10076	-1.97033	0.13043	-0.294011	-0.461108	-0.377559
44*		S	XPO5	57510		0.590037	0.458173	0.524105	-0.280582	-2.15403	-1.43184	-2.11665	-1.8714	-1.99402	0.122625	-0.559017	-0.316468	-0.437742
43*		S	C10orf59	55328		0.571403	0.477426	0.524415	-0.280325	-2.1522	-1.43109	-1.66988	-1.94711	-1.8085	0.138613	-0.158303	-0.470222	-0.314262
71*		S	XKRY2	353515		0.536132	0.513016	0.524574	-0.280193	-2.15126	-1.4307	-1.72378	-1.63975	-1.68177	0.0420192	-0.406302	-0.228862	-0.317582
15*		S	GNG10	2790		0.479732	0.569821	0.524776	-0.280026	-2.15007	-1.4302	-1.84735	-1.67713	-1.76224	0.0851066	-0.357665	-0.249246	-0.303456
36*		S	CYP4F8	11283		0.505027	0.54518	0.525103	-0.279755	-2.14814	-1.4294	-1.79765	-1.81282	-1.80523	0.0075838	-0.291257	-0.232946	-0.262101
44*		S	DPYSL5	56896		0.447932	0.602978	0.525455	-0.279464	-2.14606	-1.42854	-2.26774	-1.75501	-2.01138	0.256365	-0.674558	-0.235384	-0.454971
70*		S	LOC388809	388809		0.581018	0.470126	0.525572	-0.279368	-2.14537	-1.42826	-1.57299	-1.80562	-1.6893	0.116314	-0.139795	-0.376122	-0.257959
58*		S	FAM13C1	220965		0.603137	0.44936	0.526249	-0.278809	-2.14139	-1.4266	-1.60075	-2.00668	-1.80371	0.20296	-0.191211	-0.397748	-0.29448
9*		S	FAM62A	4881		0.563383	0.489312	0.526347	-0.278727	-2.14081	-1.42636	-1.64881	-1.91631	-1.78256	0.133753	-0.226282	-0.429015	-0.327649
54*		S	BBS5	129880		0.605686	0.447017	0.526351	-0.278724	-2.14078	-1.42635	-1.60351	-1.71563	-1.65957	0.0560616	-0.171055	-0.331411	-0.251233
28*		S	RARRES2	5919		0.588058	0.464742	0.5264	-0.278684	-2.1405	-1.42623	-1.58073	-1.78741	-1.68407	0.103342	-0.228752	-0.283616	-0.256184
22*		S	GABRR2	2570		0.604789	0.44845	0.52662	-0.278503	-2.13921	-1.42569	-1.59584	-2.08776	-1.8418	0.245957	-0.190782	-0.458644	-0.324713
43*		S	PCDHGA3	56112		0.477407	0.576394	0.5269	-0.278271	-2.13755	-1.42501	-1.74719	-1.86445	-1.80582	0.058633	-0.210011	-0.40351	-0.306761
18*		S	SPINK1	6690		0.564416	0.490015	0.527215	-0.278012	-2.1357	-1.42424	-1.94942	-2.22666	-2.08804	0.13862	-0.233235	-0.415409	-0.324322
11*		S	TERF2IP	54386		0.500131	0.554771	0.527451	-0.277818	-2.13432	-1.42366	-1.68334	-1.82438	-1.75386	0.0705191	-0.245143	-0.393027	-0.319085
68*		S	LOC387690	387690		0.554822	0.50014	0.527481	-0.277793	-2.13414	-1.42359	-1.49288	-1.78148	-1.63718	0.144298	-0.201401	-0.241485	-0.221443
70*		S	LOC400852	400852		0.503784	0.55144	0.527612	-0.277685	-2.13337	-1.42327	-1.62975	-1.7358	-1.68278	0.0530213	-0.182769	-0.318107	-0.250438
55*		S	LOC144920	144920		0.617903	0.437511	0.527707	-0.277607	-2.13282	-1.42304	-1.8046	-1.78065	-1.79262	0.011974	-0.274096	-0.25259	-0.263343
18*		S	RASA1	5921		0.615114	0.440422	0.527768	-0.277557	-2.13246	-1.42289	-1.88936	-2.28127	-2.08531	0.195956	-0.202185	-0.445977	-0.324081
38*		S	OSBP2	23762		0.585159	0.470409	0.527784	-0.277544	-2.13236	-1.42285	-1.8957	-1.76673	-1.83121	0.0644815	-0.360256	-0.292988	-0.326622
34*		S	HOMER3	9454		0.513899	0.541788	0.527844	-0.277495	-2.13202	-1.4227	-1.97847	-1.68614	-1.83231	0.146166	-0.41454	-0.222472	-0.318506
66*		S	LOC389071	389071		0.58846	0.468463	0.528462	-0.276987	-2.12839	-1.42119	-1.65397	-1.7761	-1.71503	0.0610651	-0.337186	-0.387554	-0.36237
39*		S	TSP50	29122		0.562213	0.49538	0.528797	-0.276711	-2.12643	-1.42037	-2.00263	-1.75436	-1.87849	0.124133	-0.407636	-0.40121	-0.404423
54*		S	FBXL14	144699		0.58053	0.477192	0.528861	-0.276658	-2.12605	-1.42021	-1.62418	-1.69371	-1.65895	0.0347618	-0.187023	-0.312243	-0.249633
51*		S	PPP1R3F	89801		0.447016	0.611342	0.529179	-0.276397	-2.12419	-1.41944	-1.89964	-2.02347	-1.96155	0.0619135	-0.335713	-0.409128	-0.372421
64*		S	LOC150207	150207		0.618449	0.440146	0.529297	-0.2763	-2.1235	-1.41915	-1.87024	-1.75928	-1.81476	0.0554796	-0.334261	-0.259131	-0.296696
64*		S	LOC284409	284409		0.469061	0.589952	0.529506	-0.276129	-2.12227	-1.41864	-2.01767	-1.64798	-1.83283	0.184842	-0.440492	-0.178088	-0.30929
13*		S	HSBP1	3281		0.478639	0.581321	0.52998	-0.275741	-2.1195	-1.41748	-1.92254	-1.7187	-1.82062	0.101921	-0.40805	-0.318716	-0.363383
56*		S	KIAA2026	158358		0.623101	0.43743	0.530265	-0.275507	-2.11784	-1.41678	-1.61342	-1.69154	-1.65248	0.0390581	-0.241111	-0.204028	-0.22257
31*		S	ADAMTSL3	57188		0.552516	0.508479	0.530497	-0.275317	-2.11648	-1.41621	-2.03145	-1.63053	-1.83099	0.20046	-0.386589	-0.251797	-0.319193
12*		S	VWF	7450		0.488848	0.572245	0.530547	-0.275277	-2.11619	-1.41609	-1.77501	-1.55551	-1.66526	0.109751	-0.596425	-0.11586	-0.356142
30*		S	GOLGA2	2801		0.444766	0.617856	0.531311	-0.274651	-2.11173	-1.41422	-1.88967	-1.7047	-1.79719	0.0924832	-0.486166	-0.1819	-0.334033
38*		S	ZNF473	25888		0.468419	0.594309	0.531364	-0.274608	-2.11143	-1.4141	-1.99654	-1.66263	-1.82958	0.166958	-0.43385	-0.21323	-0.32354
52*		S	RAB39B	116442		0.602868	0.460265	0.531567	-0.274442	-2.11025	-1.4136	-1.58768	-1.75321	-1.67044	0.0827687	-0.210445	-0.221592	-0.216019
18*		S	TSG101	7251		0.537194	0.526068	0.531631	-0.27439	-2.10987	-1.41344	-1.98167	-2.18696	-2.08432	0.102646	-0.249906	-0.393186	-0.321546
58*		S	LOC254028	254028		0.620291	0.443594	0.531942	-0.274135	-2.10805	-1.41268	-1.58571	-2.01154	-1.79863	0.212912	-0.179018	-0.401076	-0.290047
14*		S	CASP7	840		0.654449	0.410373	0.532411	-0.273753	-2.10533	-1.41154	-1.83467	-1.81173	-1.8232	0.0114672	-0.483675	-0.320307	-0.401991
43*		S	IPO9	55705		0.505368	0.560182	0.532775	-0.273456	-2.10321	-1.41065	-1.72419	-1.87799	-1.80109	0.0769008	-0.19463	-0.414438	-0.304534
14*		S	GAD1	2571		0.578485	0.48715	0.532818	-0.273422	-2.10296	-1.41054	-1.89859	-1.75466	-1.82663	0.0719657	-0.542855	-0.277587	-0.410221
61*		S	ZNF713	349075		0.553846	0.511823	0.532834	-0.273408	-2.10287	-1.4105	-1.59465	-1.95282	-1.77374	0.179086	-0.351578	-0.494734	-0.423156
60*		S	ILDR1	286676		0.452534	0.614004	0.533269	-0.273054	-2.10034	-1.40944	-1.74671	-1.60611	-1.67641	0.0703021	-0.170489	-0.213407	-0.191948
17*		S	PDE1A	5136		0.611142	0.455918	0.53353	-0.272841	-2.09882	-1.4088	-1.85338	-1.83288	-1.84313	0.0102533	-0.392067	-0.356544	-0.374306
8*		S	GPSM2	29899		0.537882	0.529182	0.533532	-0.27284	-2.09881	-1.4088	-1.67782	-1.75762	-1.71772	0.039897	-0.263297	-0.318256	-0.290777
46*		S	ELOVL1	64834		0.44653	0.621168	0.533849	-0.272582	-2.09697	-1.40802	-1.70225	-1.58073	-1.64149	0.060762	-0.200711	-0.212683	-0.206697
44*		S	CSRP2BP	57325		0.515059	0.552774	0.533917	-0.272527	-2.09658	-1.40786	-2.19637	-1.79536	-1.99587	0.200503	-0.619979	-0.263496	-0.441738
69*		S	LOC400558	400558		0.45244	0.615997	0.534219	-0.272281	-2.09483	-1.40712	-1.84986	-2.00713	-1.9285	0.0786368	-0.470835	-0.436278	-0.453556
39*		S	GLS2	27165		0.592635	0.475894	0.534265	-0.272244	-2.09456	-1.407	-1.97404	-1.76997	-1.872	0.102039	-0.387702	-0.415574	-0.401638
65*		S	LOC158345	158345		0.547693	0.521632	0.534663	-0.27192	-2.09226	-1.40603	-1.70727	-1.68929	-1.69828	0.00898741	-0.396882	-0.163515	-0.280199
71*		S	KATNAL2	83473		0.540734	0.528735	0.534735	-0.271862	-2.09184	-1.40586	-1.7195	-1.62686	-1.67318	0.0463197	-0.402176	-0.2183	-0.310238
30*		S	MAL	4118		0.603669	0.467172	0.53542	-0.271305	-2.08787	-1.40418	-1.75456	-1.8329	-1.79373	0.0391732	-0.368445	-0.267284	-0.317865
55*		S	SPTY2D1	144108		0.610425	0.460687	0.535556	-0.271195	-2.08708	-1.40385	-1.81097	-1.75983	-1.7854	0.0255708	-0.278571	-0.238223	-0.258397
44*		S	CCBL2	56267		0.584912	0.486389	0.535651	-0.271118	-2.08654	-1.40362	-2.12209	-1.84872	-1.98541	0.136688	-0.563184	-0.300668	-0.431926
17*		S	MMP11	4320		0.550352	0.52111	0.535731	-0.271053	-2.08607	-1.40342	-1.90804	-1.78147	-1.84476	0.0632846	-0.435954	-0.316294	-0.376124
49*		S	C10orf11	83938		0.498019	0.573582	0.535801	-0.270997	-2.08567	-1.40325	-1.78974	-1.5798	-1.68477	0.10497	-0.222381	-0.268993	-0.245687
62*		S	KRTAP12-1	353332		0.615303	0.456611	0.535957	-0.27087	-2.08477	-1.40287	-1.55101	-1.78867	-1.66984	0.118829	-0.209766	-0.429038	-0.319402
21*		S	BMP4	652		0.622637	0.449579	0.536108	-0.270748	-2.08389	-1.4025	-1.62046	-1.75364	-1.68705	0.066592	-0.240701	-0.273372	-0.257036
25*		S	SMAD1	4086		0.451172	0.621451	0.536312	-0.270583	-2.08272	-1.402	-1.9478	-1.66128	-1.80454	0.143257	-0.495236	-0.307085	-0.40116
15*		S	MMP27	64066		0.529943	0.544085	0.537014	-0.270014	-2.07866	-1.40028	-1.80113	-1.69698	-1.74905	0.0520726	-0.32206	-0.265219	-0.29364
52*		S	TJAP1	93643		0.469733	0.604647	0.53719	-0.269872	-2.07765	-1.39985	-1.68898	-1.64456	-1.66677	0.0222104	-0.296337	-0.147664	-0.222001
18*		S	ARHGEF7	8874		0.580869	0.494631	0.53775	-0.26942	-2.07442	-1.39848	-1.92993	-2.22158	-2.07575	0.145826	-0.223158	-0.412563	-0.317861
55*		S	NBPF4	148545		0.612829	0.463127	0.537978	-0.269235	-2.07311	-1.39793	-1.80892	-1.75764	-1.78328	0.0256421	-0.277132	-0.236711	-0.256922
43*		S	DMAP1	55929		0.5649	0.512607	0.538753	-0.26861	-2.06865	-1.39603	-1.67523	-1.91773	-1.79648	0.121248	-0.16188	-0.446507	-0.304194
40*		S	TXNDC14	51075		0.50488	0.572718	0.538799	-0.268573	-2.06838	-1.39592	-1.63734	-1.81284	-1.72509	0.087748	-0.293476	-0.330402	-0.311939
24*		S	BANP	54971		0.504506	0.573236	0.538871	-0.268515	-2.06797	-1.39574	-1.76789	-1.5792	-1.67355	0.0943463	-0.36624	-0.147044	-0.256642
48*		S	CCDC130	81576		0.587082	0.490833	0.538957	-0.268445	-2.06747	-1.39553	-1.69931	-1.94143	-1.82037	0.121062	-0.295507	-0.60321	-0.449359
47*		S	NSUN7	79730		0.670927	0.408248	0.539587	-0.267938	-2.06385	-1.39399	-1.68995	-1.64294	-1.66644	0.0235041	-0.174234	-0.284591	-0.229413
27*		S	NGFRAP1	27018		0.584515	0.494915	0.539715	-0.267836	-2.06312	-1.39368	-1.58008	-1.8699	-1.72499	0.144911	-0.147875	-0.311651	-0.229763
69*		S	LOC387912	387912		0.5378	0.54288	0.54034	-0.267333	-2.05954	-1.39215	-1.78069	-2.0726	-1.92664	0.145952	-0.40948	-0.483597	-0.446538
18*		S	MCF2	4168		0.629298	0.451492	0.540395	-0.267289	-2.05922	-1.39202	-1.87255	-2.26908	-2.07082	0.198264	-0.193499	-0.439153	-0.316326
28*		S	SCGB1D1	10648		0.604493	0.476867	0.54068	-0.26706	-2.05759	-1.39132	-1.56858	-1.77784	-1.67321	0.10463	-0.217814	-0.276745	-0.24728
42*		S	FLJ10246	55104		0.542317	0.539881	0.541099	-0.266723	-2.05519	-1.3903	-1.61501	-1.67358	-1.64429	0.0292876	-0.179981	-0.319914	-0.249948
23*		S	KRT6B	3854		0.590976	0.492006	0.541491	-0.266409	-2.05295	-1.38934	-1.37228	-1.79034	-1.58131	0.209032	-0.111499	-0.433106	-0.272303
54*		S	PLEKHH2	130271		0.626558	0.456581	0.54157	-0.266346	-2.0525	-1.38915	-1.58635	-1.70868	-1.64752	0.0611642	-0.157806	-0.325336	-0.241571
52*		S	PEX11G	92960		0.608214	0.474931	0.541573	-0.266343	-2.05248	-1.38914	-1.58361	-1.74218	-1.66289	0.0792843	-0.206996	-0.214083	-0.21054
71*		S	FIGLA	344018		0.523145	0.56052	0.541833	-0.266135	-2.05099	-1.3885	-1.73588	-1.6008	-1.66834	0.0675437	-0.417945	-0.196944	-0.307444
38*		S	POLDIP2	26073		0.468082	0.615785	0.541933	-0.266054	-2.05042	-1.38826	-1.99683	-1.64458	-1.82071	0.176126	-0.434063	-0.199405	-0.316734
54*		S	ZNF513	130557		0.534466	0.549732	0.542099	-0.265921	-2.04947	-1.38785	-1.66204	-1.641	-1.65152	0.0105207	-0.216263	-0.266165	-0.241214
44*		S	ISY1	57461		0.633871	0.45176	0.542816	-0.265348	-2.04538	-1.3861	-2.07004	-1.87655	-1.97329	0.0967434	-0.523376	-0.320059	-0.421717
61*		S	C17orf67	339210		0.580695	0.504988	0.542841	-0.265327	-2.04523	-1.38604	-1.57374	-1.95891	-1.76633	0.192584	-0.329931	-0.499782	-0.414856
21*		S	HAMP	57817		0.577805	0.508094	0.542949	-0.265241	-2.04462	-1.38577	-1.65725	-1.70582	-1.68154	0.0242851	-0.272469	-0.237645	-0.255057
40*		S	ZNF691	51058		0.554588	0.532884	0.543736	-0.264612	-2.04013	-1.38385	-1.59823	-1.84747	-1.72285	0.12462	-0.257877	-0.356784	-0.30733
60*		S	OR2V2	285659		0.598489	0.489058	0.543774	-0.264582	-2.03992	-1.38376	-1.62916	-1.70152	-1.66534	0.0361816	-0.0993259	-0.29332	-0.196323
18*		S	SPINK5	11005		0.599846	0.487863	0.543855	-0.264517	-2.03946	-1.38356	-1.90744	-2.22903	-2.06824	0.160793	-0.211536	-0.416735	-0.314135
43*		S	DNAH3	55567		0.634482	0.453449	0.543965	-0.264429	-2.03882	-1.38329	-1.61801	-1.96713	-1.79257	0.174564	-0.123602	-0.486384	-0.304993
59*		S	OR7E156P	283491		0.494821	0.593136	0.543979	-0.264418	-2.03875	-1.38326	-1.63831	-1.75516	-1.69674	0.058423	-0.316358	-0.342019	-0.329188
30*		S	GOLGA1	2800		0.518624	0.570252	0.544438	-0.264052	-2.03614	-1.38213	-1.82687	-1.7452	-1.78604	0.0408324	-0.431449	-0.208874	-0.320162
32*		S	RPL12	6136		0.608291	0.480778	0.544535	-0.263975	-2.03559	-1.3819	-1.71271	-1.93498	-1.82385	0.111135	-0.318472	-0.406567	-0.36252
41*		S	C9orf11	54586		0.64102	0.448298	0.544659	-0.263875	-2.03488	-1.38159	-1.67571	-1.81322	-1.74446	0.0687575	-0.305853	-0.25279	-0.279321
16*		S	UBL4A	8266		0.463392	0.625939	0.544666	-0.26387	-2.03484	-1.38158	-2.04482	-1.58037	-1.81259	0.232225	-0.534353	-0.236273	-0.385313
31*		S	MYBPH	4608		0.603814	0.485609	0.544712	-0.263833	-2.03458	-1.38146	-1.98357	-1.64714	-1.81535	0.168212	-0.355306	-0.266192	-0.310749
52*		S	LRRC4B	94030		0.628674	0.460899	0.544786	-0.263774	-2.03415	-1.38128	-1.56804	-1.75274	-1.66039	0.0923483	-0.193796	-0.221268	-0.207532
47*		S	ZNF671	79891		0.541256	0.548565	0.54491	-0.263675	-2.03345	-1.38098	-1.7984	-1.5406	-1.6695	0.128899	-0.245818	-0.19424	-0.220029
22*		S	NR4A2	4929		0.591342	0.499055	0.545199	-0.263445	-2.03181	-1.38027	-1.60632	-2.03965	-1.82298	0.216665	-0.199285	-0.425702	-0.312493
31*		S	AD026	57413		0.466808	0.623678	0.545243	-0.26341	-2.03156	-1.38017	-2.11144	-1.54683	-1.82914	0.282309	-0.438857	-0.179286	-0.309071
33*		S	TMSB4X	7114		0.49102	0.599752	0.545386	-0.263296	-2.03075	-1.37982	-1.89858	-1.79803	-1.8483	0.0502748	-0.433659	-0.194644	-0.314152
44*		S	KIAA1161	57462		0.639503	0.453095	0.546299	-0.26257	-2.02557	-1.37758	-2.06405	-1.87548	-1.96976	0.0942856	-0.518797	-0.319311	-0.419054
71*		S	OR5B17	219965		0.551372	0.541806	0.546589	-0.262339	-2.02392	-1.37687	-1.70959	-1.61614	-1.66286	0.046723	-0.392639	-0.209518	-0.301078
39*		S	RBM15B	29890		0.559591	0.53366	0.546625	-0.26231	-2.02371	-1.37679	-2.00509	-1.72371	-1.8644	0.140691	-0.409354	-0.372992	-0.391173
63*		S	LOC123855	123855		0.619741	0.473674	0.546708	-0.262245	-2.02325	-1.37658	-1.73217	-1.93947	-1.83582	0.10365	-0.291106	-0.435062	-0.363084
15*		S	MTRR	4552		0.468992	0.624641	0.546817	-0.262158	-2.02263	-1.37632	-1.85723	-1.63485	-1.74604	0.111189	-0.365281	-0.215221	-0.290251
59*		S	LOC283403	283403		0.511362	0.582503	0.546933	-0.262066	-2.02198	-1.37603	-1.62503	-1.76376	-1.69439	0.0693648	-0.303692	-0.349082	-0.326387
21*		S	IL2RB	3560		0.639986	0.454295	0.547141	-0.261901	-2.0208	-1.37553	-1.60622	-1.74979	-1.67801	0.0717837	-0.228407	-0.270492	-0.24945
39*		S	YPEL1	29799		0.596268	0.498336	0.547302	-0.261773	-2.01988	-1.37513	-1.97063	-1.75199	-1.86131	0.109318	-0.385322	-0.399031	-0.392176
38*		S	WIPI2	26100		0.549608	0.546221	0.547914	-0.261287	-2.01642	-1.37363	-1.92641	-1.70303	-1.81472	0.111687	-0.382668	-0.244186	-0.313427
68*		S	LOC392395	392395		0.433546	0.662473	0.54801	-0.261212	-2.01588	-1.3734	-1.57692	-1.64396	-1.61044	0.0335166	-0.284809	-0.148	-0.216405
67*		S	FEZF1	389549		0.555505	0.540879	0.548192	-0.261067	-2.01485	-1.37296	-1.70038	-1.98855	-1.84447	0.144084	-0.175657	-0.44741	-0.311534
43*		S	SMPD4	55627		0.50499	0.591744	0.548367	-0.260929	-2.01386	-1.37253	-1.7245	-1.85163	-1.78807	0.0635652	-0.194838	-0.393163	-0.294
51*		S	FAM86B1	85002		0.558249	0.539027	0.548638	-0.260714	-2.01233	-1.37187	-1.79254	-2.09887	-1.9457	0.153166	-0.260951	-0.459838	-0.360395
56*		S	RG9MTD3	158234		0.620113	0.477198	0.548655	-0.2607	-2.01223	-1.37182	-1.61585	-1.65976	-1.63781	0.0219548	-0.243235	-0.181897	-0.212566
8*		S	CELSR1	9620		0.59873	0.499219	0.548975	-0.260448	-2.01043	-1.37104	-1.62563	-1.78451	-1.70507	0.0794403	-0.220248	-0.337164	-0.278706
28*		S	PTTG1IP	754		0.61103	0.486978	0.549004	-0.260424	-2.01027	-1.37097	-1.56375	-1.76986	-1.6668	0.103055	-0.213464	-0.271016	-0.24224
44*		S	C12orf4	57102		0.645824	0.452505	0.549165	-0.260298	-2.00936	-1.37058	-2.05733	-1.87595	-1.96664	0.090688	-0.513658	-0.319641	-0.41665
71*		S	FLJ41170	440200		0.605934	0.492629	0.549281	-0.260205	-2.0087	-1.37029	-1.65875	-1.65646	-1.65761	0.0011462	-0.343723	-0.242559	-0.293141
10*		S	KIFAP3	22920		0.470575	0.628973	0.549774	-0.259816	-2.00592	-1.36909	-1.74872	-1.81008	-1.7794	0.0306794	-0.293322	-0.34734	-0.320331
63*		S	MGC39545	403312		0.58427	0.515781	0.550025	-0.259617	-2.00451	-1.36847	-1.76404	-1.90557	-1.83481	0.0707645	-0.316565	-0.408698	-0.362632
30*		S	LY9	4063		0.522887	0.577228	0.550057	-0.259592	-2.00433	-1.36839	-1.82324	-1.73927	-1.78126	0.0419875	-0.428291	-0.204922	-0.316606
63*		S	LOC126987	126987		0.535515	0.564681	0.550098	-0.25956	-2.0041	-1.3683	-1.80785	-1.8662	-1.83703	0.0291762	-0.351558	-0.378082	-0.36482
26*		S	FGD6	55785		0.530849	0.569605	0.550227	-0.259458	-2.00337	-1.36798	-1.76745	-1.9339	-1.85068	0.0832263	-0.257574	-0.393813	-0.325693
21*		S	DGCR2	9993		0.624344	0.476114	0.550229	-0.259457	-2.00336	-1.36798	-1.61906	-1.73196	-1.67551	0.0564495	-0.239491	-0.257171	-0.248331
38*		S	CCDC9	26093		0.535482	0.56558	0.550531	-0.259218	-2.00166	-1.36724	-1.93861	-1.68677	-1.81269	0.125922	-0.391573	-0.231724	-0.311649
69*		S	LOC390595	390595		0.619746	0.481549	0.550647	-0.259126	-2.00101	-1.36695	-1.71429	-2.12751	-1.9209	0.206609	-0.350579	-0.523289	-0.436934
22*		S	DSP	1832		0.577771	0.524104	0.550937	-0.258898	-1.99938	-1.36624	-1.61689	-2.01583	-1.81636	0.199472	-0.207866	-0.409396	-0.308631
49*		S	SYT3	84258		0.488612	0.613462	0.551037	-0.258819	-1.99882	-1.366	-1.79772	-1.54898	-1.67335	0.124368	-0.227521	-0.239193	-0.233357
37*		S	CRTC1	23373		0.624034	0.479273	0.551654	-0.258334	-1.99535	-1.36449	-1.5807	-1.8379	-1.7093	0.1286	-0.247503	-0.341931	-0.294717
30*		S	GUCY1B2	2974		0.483736	0.619783	0.551759	-0.25825	-1.99476	-1.36423	-1.85653	-1.70307	-1.7798	0.0767348	-0.457296	-0.180808	-0.319052
62*		S	NSUN4	387338		0.535385	0.568785	0.552085	-0.257994	-1.99293	-1.36344	-1.61634	-1.70566	-1.661	0.0446627	-0.269431	-0.352932	-0.311182
59*		S	SSX8	280659		0.630705	0.473481	0.552093	-0.257988	-1.99289	-1.36342	-1.52918	-1.85193	-1.69055	0.161373	-0.212308	-0.4215	-0.316904
46*		S	SLC26A6	65010		0.465835	0.638382	0.552109	-0.257976	-1.9928	-1.36338	-1.68751	-1.56738	-1.62745	0.0600624	-0.190358	-0.201053	-0.195706
52*		S	COQ10A	93058		0.603076	0.501449	0.552262	-0.257854	-1.99194	-1.363	-1.58752	-1.72222	-1.65487	0.0673516	-0.210311	-0.200505	-0.205408
8*		S	GNB3	2784		0.502567	0.602764	0.552666	-0.257538	-1.98968	-1.36202	-1.70812	-1.69157	-1.69984	0.00827295	-0.288282	-0.271821	-0.280052
21*		S	NGF	4803		0.500687	0.604923	0.552805	-0.257428	-1.98889	-1.36168	-1.72054	-1.62669	-1.67361	0.046926	-0.327116	-0.178524	-0.25282
54*		S	TMEM207	131920		0.627948	0.478989	0.553469	-0.256907	-1.98518	-1.36006	-1.58521	-1.6924	-1.63881	0.0535949	-0.156924	-0.311102	-0.234013
70*		S	LOC400831	400831		0.543351	0.563787	0.553569	-0.256828	-1.98462	-1.35981	-1.60067	-1.7252	-1.66293	0.0622607	-0.160753	-0.309297	-0.235025
54*		S	C1orf102	127700		0.644011	0.463164	0.553588	-0.256814	-1.98451	-1.35977	-1.57201	-1.7039	-1.63795	0.0659449	-0.146728	-0.321154	-0.233941
40*		S	MRPL4	51073		0.59643	0.511212	0.553821	-0.256631	-1.98321	-1.35919	-1.56531	-1.86632	-1.71581	0.150502	-0.227911	-0.371137	-0.299524
31*		S	MACC1	346389		0.537702	0.570297	0.553999	-0.256491	-1.98221	-1.35876	-2.04527	-1.58561	-1.81544	0.229831	-0.395623	-0.212886	-0.304255
59*		S	GPR137C	283554		0.629197	0.478829	0.554013	-0.25648	-1.98213	-1.35872	-1.53039	-1.8476	-1.689	0.158605	-0.213463	-0.417947	-0.315705
18*		S	PBX3	5090		0.469419	0.63938	0.5544	-0.256177	-1.97997	-1.35778	-2.06197	-2.0622	-2.06208	0.000113386	-0.291414	-0.323343	-0.307379
65*		S	LOC346887	346887		0.619253	0.489555	0.554404	-0.256174	-1.97995	-1.35777	-1.64673	-1.71617	-1.68145	0.0347165	-0.337951	-0.180994	-0.259472
32*		S	PSMD13	5719		0.568453	0.54039	0.554422	-0.25616	-1.97985	-1.35773	-1.74452	-1.88539	-1.81496	0.0704388	-0.345833	-0.369494	-0.357663
33*		S	SPOP	8405		0.469495	0.639765	0.55463	-0.255997	-1.97869	-1.35722	-1.91725	-1.76274	-1.84	0.0772561	-0.448791	-0.173683	-0.311237
70*		S	LOC388481	388481		0.539839	0.569583	0.554711	-0.255933	-1.97823	-1.35702	-1.60326	-1.72022	-1.66174	0.0584817	-0.162707	-0.305162	-0.233935
17*		S	XRCC3	7517		0.563172	0.54633	0.554751	-0.255902	-1.97801	-1.35692	-1.89652	-1.76159	-1.82905	0.0674637	-0.426699	-0.300722	-0.363711
22*		S	NR5A2	2494		0.649126	0.46059	0.554858	-0.255818	-1.97741	-1.35666	-1.56131	-2.07622	-1.81876	0.257454	-0.162746	-0.450741	-0.306744
70*		S	LOC388915	388915		0.589081	0.520775	0.554928	-0.255763	-1.97702	-1.35649	-1.56706	-1.76213	-1.6646	0.0975322	-0.135308	-0.339985	-0.237647
32*		S	RPL13	6137		0.554134	0.556405	0.555269	-0.255496	-1.97512	-1.35565	-1.75595	-1.87207	-1.81401	0.0580621	-0.355668	-0.359534	-0.357601
32*		S	PSMA3	5684		0.491487	0.619375	0.555431	-0.25537	-1.97422	-1.35526	-1.80596	-1.81969	-1.81283	0.00686466	-0.398694	-0.320372	-0.359533
55*		S	CBLN2	147381		0.648352	0.46413	0.556241	-0.254737	-1.9697	-1.35328	-1.77864	-1.75674	-1.76769	0.0109529	-0.255877	-0.236089	-0.245983
69*		S	dJ612B15.1	388132		0.619302	0.493293	0.556298	-0.254693	-1.96939	-1.35314	-1.71465	-2.11699	-1.91582	0.201171	-0.350898	-0.515688	-0.433293
67*		S	LOC402202	402202		0.640819	0.472791	0.556805	-0.254297	-1.96656	-1.3519	-1.63452	-2.05143	-1.84297	0.208455	-0.132353	-0.49417	-0.313262
59*		S	C11orf85	283129		0.63606	0.477901	0.55698	-0.25416	-1.96559	-1.35147	-1.52488	-1.84835	-1.68662	0.161736	-0.208208	-0.418564	-0.313386
18*		S	TIMP3	7078		0.59258	0.521537	0.557059	-0.254099	-1.96515	-1.35128	-1.91605	-2.19195	-2.054	0.13795	-0.215986	-0.395979	-0.305983
70*		S	LOC400526	400526		0.616544	0.497651	0.557098	-0.254069	-1.96494	-1.35118	-1.54688	-1.78198	-1.66443	0.117552	-0.120028	-0.356484	-0.238256
44*		S	LXN	56925		0.54986	0.564825	0.557342	-0.253878	-1.96357	-1.35059	-2.15936	-1.78568	-1.97252	0.186844	-0.591683	-0.256748	-0.424216
22*		S	AMELX	265		0.616175	0.498525	0.55735	-0.253872	-1.96353	-1.35057	-1.58697	-2.04015	-1.81356	0.226588	-0.183582	-0.426047	-0.304815
39*		S	DDX25	29118		0.531276	0.583924	0.5576	-0.253677	-1.96214	-1.34996	-2.0317	-1.68346	-1.85758	0.174118	-0.427908	-0.335939	-0.381923
44*		S	STARD7	56910		0.620625	0.495873	0.558249	-0.253172	-1.95854	-1.34837	-2.08412	-1.8411	-1.96261	0.121513	-0.534146	-0.295358	-0.414752
28*		S	SELL	6402		0.506214	0.610374	0.558294	-0.253137	-1.95829	-1.34826	-1.64122	-1.67246	-1.65684	0.0156184	-0.283221	-0.201095	-0.242158
69*		S	LOC387789	387789		0.602766	0.514183	0.558474	-0.252997	-1.95729	-1.34782	-1.72805	-2.09829	-1.91317	0.18512	-0.362783	-0.502169	-0.432476
42*		S	C19orf60	55049		0.518888	0.598077	0.558482	-0.25299	-1.95724	-1.3478	-1.63182	-1.62438	-1.6281	0.00371709	-0.192969	-0.275212	-0.23409
40*		S	TXNDC12	51060		0.638872	0.478502	0.558687	-0.252831	-1.95611	-1.3473	-1.53192	-1.89476	-1.71334	0.181419	-0.197516	-0.392801	-0.295158
43*		S	DDX28	55794		0.623668	0.493885	0.558777	-0.252762	-1.95561	-1.34708	-1.6269	-1.93336	-1.78013	0.153232	-0.129551	-0.459128	-0.294339
40*		S	THAP4	51078		0.557688	0.560292	0.55899	-0.252596	-1.95443	-1.34656	-1.59579	-1.82364	-1.70972	0.113925	-0.255657	-0.338632	-0.297144
66*		S	LOC388955	388955		0.579536	0.538508	0.559022	-0.252571	-1.95425	-1.34648	-1.66146	-1.72373	-1.69259	0.0311329	-0.344397	-0.341606	-0.343002
31*		S	TBC1D25	4943		0.503416	0.615252	0.559334	-0.252329	-1.95253	-1.34572	-2.07728	-1.55295	-1.81511	0.262164	-0.416532	-0.184589	-0.300561
20*		S	HLA-DOB	3112		0.494413	0.624641	0.559527	-0.252179	-1.95146	-1.34524	-1.70902	-1.39643	-1.55273	0.156291	-0.226297	-0.0786306	-0.152464
71*		S	NCCRP1	342897		0.582347	0.53698	0.559663	-0.252073	-1.9507	-1.34491	-1.68073	-1.6201	-1.65041	0.0303157	-0.364869	-0.21276	-0.288815
56*		S	FREM1	158326		0.541143	0.578207	0.559675	-0.252064	-1.95064	-1.34488	-1.68011	-1.57906	-1.62958	0.0505289	-0.299354	-0.125685	-0.21252
40*		S	SHISA5	51246		0.65845	0.461883	0.560167	-0.251683	-1.94792	-1.34368	-1.51651	-1.90921	-1.71286	0.196346	-0.183495	-0.403807	-0.293651
42*		S	RCBTB1	55213		0.629765	0.491092	0.560428	-0.25148	-1.94647	-1.34304	-1.55226	-1.71483	-1.63354	0.0812838	-0.131505	-0.357391	-0.244448
69*		S	LOC399986	399986		0.616127	0.505046	0.560586	-0.251357	-1.9456	-1.34265	-1.71722	-2.10647	-1.91185	0.194624	-0.35318	-0.508082	-0.430631
34*		S	SPTLC2	9517		0.638902	0.482498	0.5607	-0.251269	-1.94497	-1.34238	-1.8737	-1.73273	-1.80321	0.0704872	-0.338722	-0.257126	-0.297924
29*		S	COX6B1	1431		0.570494	0.551534	0.561014	-0.251026	-1.94324	-1.34161	-1.59234	-1.83997	-1.71616	0.123814	-0.125608	-0.444782	-0.285195
46*		S	ATAD4	79170		0.444389	0.678008	0.561199	-0.250883	-1.94222	-1.34116	-1.70389	-1.53667	-1.62028	0.083608	-0.201859	-0.174281	-0.18807
18*		S	ACTR1B	10120		0.657839	0.464611	0.561225	-0.250863	-1.94207	-1.34109	-1.83874	-2.25463	-2.04669	0.207949	-0.176019	-0.431067	-0.303543
70*		S	LOC388340	388340		0.592466	0.530157	0.561311	-0.250796	-1.94159	-1.34088	-1.56458	-1.75407	-1.65932	0.0947481	-0.133425	-0.333291	-0.233358
64*		S	LOC150051	150051		0.472447	0.650782	0.561615	-0.250562	-1.93992	-1.34014	-2.01433	-1.60279	-1.80856	0.205768	-0.438084	-0.14518	-0.291632
36*		S	TRAFD1	10906		0.635256	0.488155	0.561705	-0.250491	-1.93942	-1.33992	-1.69177	-1.86103	-1.7764	0.0846338	-0.213552	-0.263481	-0.238517
43*		S	THUMPD1	55623		0.668578	0.455215	0.561897	-0.250344	-1.93837	-1.33945	-1.58996	-1.96566	-1.77781	0.187847	-0.104845	-0.485194	-0.29502
50*		S	DISP1	84976		0.554963	0.569073	0.562018	-0.25025	-1.9377	-1.33915	-1.51907	-1.76782	-1.64345	0.124377	-0.177679	-0.308957	-0.243318
38*		S	DNPEP	23549		0.463591	0.660632	0.562111	-0.250178	-1.93718	-1.33893	-2.00071	-1.6069	-1.80381	0.196907	-0.436894	-0.170536	-0.303715
17*		S	PTPN2	5771		0.442366	0.682592	0.562479	-0.249894	-1.93516	-1.33803	-2.00514	-1.65415	-1.82964	0.175496	-0.513915	-0.216592	-0.365254
55*		S	C19orf55	148137		0.637838	0.487197	0.562518	-0.249864	-1.93495	-1.33793	-1.78761	-1.73602	-1.76181	0.0257946	-0.262168	-0.221791	-0.241979
37*		S	RTF1	23168		0.62327	0.501854	0.562562	-0.24983	-1.9347	-1.33782	-1.58134	-1.82062	-1.70098	0.119645	-0.248091	-0.328804	-0.288448
42*		S	SPTLC3	55304		0.540999	0.584199	0.562599	-0.249801	-1.9345	-1.33773	-1.61595	-1.63612	-1.62603	0.0100817	-0.180712	-0.285872	-0.233292
12*		S	TNFAIP6	7130		0.539472	0.586149	0.56281	-0.249638	-1.93333	-1.33722	-1.73154	-1.54421	-1.63788	0.0936646	-0.547145	-0.107516	-0.32733
24*		S	CACNA1D	776		0.513804	0.612203	0.563003	-0.249489	-1.93227	-1.33675	-1.76005	-1.54759	-1.65382	0.106226	-0.35948	-0.123359	-0.24142
52*		S	ZFP62	92379		0.5136	0.61244	0.56302	-0.249476	-1.93218	-1.33671	-1.6556	-1.6387	-1.64715	0.008453	-0.268036	-0.143674	-0.205855
57*		S	SPRR4	163778		0.612289	0.513908	0.563098	-0.249416	-1.93175	-1.33651	-2.0161	-1.64966	-1.83288	0.18322	-0.438459	-0.306801	-0.37263
38*		S	PRPF6	24148		0.576385	0.550356	0.56337	-0.249206	-1.93025	-1.33585	-1.90328	-1.69956	-1.80142	0.101859	-0.365788	-0.241524	-0.303656
37*		S	KIAA0892	23383		0.521368	0.605476	0.563422	-0.249166	-1.92997	-1.33572	-1.66617	-1.74135	-1.70376	0.0375922	-0.326579	-0.268564	-0.297571
21*		S	GDF5	8200		0.629158	0.498189	0.563674	-0.248972	-1.92859	-1.33511	-1.61511	-1.71392	-1.66451	0.0494043	-0.23608	-0.243692	-0.239886
22*		S	NR2F2	7026		0.590378	0.537542	0.56396	-0.248752	-1.92701	-1.33441	-1.60707	-2.00306	-1.80506	0.197995	-0.199895	-0.400648	-0.300271
66*		S	LOC389264	389264		0.587003	0.540985	0.563994	-0.248726	-1.92683	-1.33432	-1.65519	-1.72188	-1.68853	0.0333412	-0.338364	-0.339981	-0.339172
43*		S	MNS1	55329		0.66994	0.459091	0.564515	-0.248324	-1.92396	-1.33305	-1.58884	-1.96242	-1.77563	0.186789	-0.104096	-0.482581	-0.293339
61*		S	LOC348174	348174		0.512536	0.616574	0.564555	-0.248294	-1.92375	-1.33295	-1.62682	-1.85948	-1.74315	0.116333	-0.384884	-0.417366	-0.401125
57*		S	APLF	200558		0.530218	0.599303	0.56476	-0.248136	-1.92262	-1.33245	-2.09161	-1.58376	-1.83769	0.253925	-0.491433	-0.24594	-0.368687
51*		S	SYTL4	94121		0.583835	0.545812	0.564824	-0.248087	-1.92227	-1.3323	-1.7679	-2.0918	-1.92985	0.161946	-0.243754	-0.45508	-0.349417
10*		S	CDY1	9085		0.486142	0.64377	0.564956	-0.247985	-1.92155	-1.33197	-1.73671	-1.79631	-1.76651	0.0298002	-0.283876	-0.336413	-0.310144
36*		S	LECT1	11061		0.600292	0.529904	0.565098	-0.247876	-1.92077	-1.33163	-1.72019	-1.82573	-1.77296	0.0527693	-0.234415	-0.241125	-0.23777
17*		S	PIN1	5300		0.64377	0.487555	0.565662	-0.247443	-1.91768	-1.33025	-1.82404	-1.80793	-1.81599	0.00805705	-0.368511	-0.337011	-0.352761
38*		S	FLRT2	23768		0.607758	0.523602	0.56568	-0.247429	-1.91758	-1.3302	-1.87617	-1.72204	-1.79911	0.0770677	-0.34601	-0.258746	-0.302378
36*		S	ATE1	11101		0.594677	0.536686	0.565681	-0.247428	-1.91757	-1.3302	-1.72476	-1.82	-1.77238	0.0476194	-0.237765	-0.237494	-0.237629
22*		S	SLIT2	9353		0.549653	0.581996	0.565824	-0.247318	-1.91679	-1.32985	-1.63879	-1.9608	-1.79979	0.161002	-0.225646	-0.37171	-0.298678
67*		S	LOC389398	389398		0.637407	0.494676	0.566041	-0.247152	-1.9156	-1.32932	-1.63715	-2.03122	-1.83419	0.197033	-0.134085	-0.479141	-0.306613
21*		S	IKBKG	8517		0.557331	0.575791	0.566561	-0.246753	-1.91276	-1.32805	-1.67405	-1.6505	-1.66228	0.011779	-0.286977	-0.196311	-0.241644
68*		S	BSX	390259		0.619471	0.514679	0.567075	-0.246359	-1.90995	-1.32679	-1.44809	-1.76916	-1.60862	0.160539	-0.156939	-0.233113	-0.195026
51*		S	KRTAP2-4	85294		0.567617	0.567854	0.567735	-0.245854	-1.90635	-1.32518	-1.78352	-2.06881	-1.92617	0.142647	-0.254655	-0.439624	-0.347139
70*		S	FLJ25917	401585		0.584311	0.551596	0.567954	-0.245687	-1.90516	-1.32464	-1.57057	-1.73566	-1.65312	0.0825469	-0.137963	-0.317995	-0.227979
15*		S	PAFAH1B2	5049		0.482408	0.654397	0.568403	-0.245344	-1.90271	-1.32355	-1.84488	-1.6119	-1.72839	0.116489	-0.355767	-0.196753	-0.27626
37*		S	VPS8	23355		0.55171	0.58557	0.56864	-0.245163	-1.90141	-1.32297	-1.64091	-1.75658	-1.69874	0.0578361	-0.303209	-0.280136	-0.291672
47*		S	LRFN3	79414		0.65251	0.485375	0.568943	-0.244932	-1.89977	-1.32223	-1.70535	-1.58669	-1.64602	0.0593321	-0.184401	-0.234928	-0.209665
22*		S	AHR	196		0.633759	0.504198	0.568979	-0.244904	-1.89957	-1.32214	-1.57328	-2.03476	-1.80402	0.23074	-0.172463	-0.422354	-0.297409
31*		S	AIM1L	55057		0.564876	0.573227	0.569052	-0.244848	-1.89917	-1.32196	-2.01991	-1.58348	-1.8017	0.218214	-0.379052	-0.211042	-0.295047
47*		S	SCRN3	79634		0.626181	0.51207	0.569125	-0.244792	-1.89877	-1.32178	-1.72737	-1.56722	-1.64729	0.0800772	-0.198936	-0.217739	-0.208338
30*		S	GNGT2	2793		0.491824	0.646475	0.569149	-0.244774	-1.89864	-1.32172	-1.84966	-1.68036	-1.76501	0.0846505	-0.451304	-0.165683	-0.308493
61*		S	PDDC1	347862		0.544836	0.593762	0.569299	-0.24466	-1.89783	-1.32135	-1.60167	-1.87981	-1.74074	0.139072	-0.358842	-0.434215	-0.396529
18*		S	WFDC1	58189		0.663216	0.475439	0.569327	-0.244638	-1.89767	-1.32129	-1.83237	-2.24271	-2.03754	0.205172	-0.172726	-0.424393	-0.298559
69*		S	LOC390213	390213		0.563101	0.575925	0.569513	-0.244496	-1.89666	-1.32083	-1.76019	-2.04301	-1.9016	0.14141	-0.391294	-0.462211	-0.426753
17*		S	TOP3A	7156		0.622116	0.517345	0.569731	-0.244331	-1.89548	-1.3203	-1.84352	-1.78444	-1.81398	0.0295367	-0.384144	-0.318618	-0.351381
23*		S	EPB41	2035		0.475743	0.664121	0.569932	-0.244177	-1.89438	-1.31981	-1.45599	-1.64395	-1.54997	0.0939824	-0.2009	-0.29885	-0.249875
21*		S	CLEC1B	51266		0.561153	0.580177	0.570665	-0.243619	-1.8904	-1.31802	-1.67092	-1.64691	-1.65891	0.012003	-0.284269	-0.193633	-0.238951
22*		S	GABRA2	2555		0.663968	0.478418	0.571193	-0.243217	-1.88754	-1.31672	-1.54975	-2.05927	-1.80451	0.25476	-0.153361	-0.439136	-0.296248
69*		S	LOC387791	387791		0.682919	0.4601	0.57151	-0.242977	-1.88582	-1.31595	-1.6631	-2.14671	-1.90491	0.241805	-0.305171	-0.53717	-0.42117
49*		S	COG8	84342		0.554719	0.58859	0.571654	-0.242866	-1.88504	-1.3156	-1.74162	-1.5682	-1.65491	0.0867105	-0.191401	-0.257778	-0.22459
38*		S	SENP6	26054		0.576545	0.567021	0.571783	-0.242769	-1.88434	-1.31528	-1.90314	-1.68556	-1.79435	0.108791	-0.365687	-0.230796	-0.298242
8*		S	HTR3B	9177		0.605187	0.538539	0.571863	-0.242708	-1.88391	-1.31509	-1.6201	-1.74922	-1.68466	0.0645621	-0.21568	-0.312351	-0.264015
54*		S	CXorf41	139212		0.653944	0.490088	0.572016	-0.242592	-1.88308	-1.31471	-1.56385	-1.68434	-1.62409	0.0602456	-0.140423	-0.304052	-0.222237
37*		S	PHF8	23133		0.536789	0.607642	0.572215	-0.24244	-1.882	-1.31422	-1.65333	-1.7397	-1.69651	0.0431826	-0.314701	-0.267304	-0.291003
59*		S	C12orf61	283416		0.556549	0.588063	0.572306	-0.242372	-1.88151	-1.314	-1.58874	-1.75926	-1.674	0.0852617	-0.269091	-0.345388	-0.30724
24*		S	SLC25A27	9481		0.550652	0.594251	0.572452	-0.242261	-1.88072	-1.31365	-1.72896	-1.56215	-1.64556	0.0834012	-0.332689	-0.134271	-0.23348
22*		S	CRYBA1	1411		0.586985	0.558204	0.572595	-0.242153	-1.87995	-1.3133	-1.60971	-1.98342	-1.79656	0.186852	-0.20204	-0.387198	-0.294619
47*		S	ZC3H14	79882		0.549813	0.595668	0.57274	-0.242042	-1.87916	-1.31294	-1.79124	-1.50624	-1.64874	0.142498	-0.241094	-0.16391	-0.202502
43*		S	IARS2	55699		0.580065	0.565457	0.572761	-0.242027	-1.87905	-1.31289	-1.66276	-1.87359	-1.76817	0.105414	-0.153538	-0.410883	-0.28221
47*		S	CYBRD1	79901		0.545166	0.60086	0.573013	-0.241836	-1.87768	-1.31228	-1.79513	-1.50246	-1.64879	0.146335	-0.243659	-0.160566	-0.202113
8*		S	GPR35	2859		0.543141	0.603743	0.573442	-0.241511	-1.87537	-1.31123	-1.67331	-1.69069	-1.682	0.00868835	-0.259577	-0.271203	-0.26539
46*		S	UNKL	64718		0.5124	0.634587	0.573493	-0.241472	-1.87509	-1.3111	-1.65195	-1.57033	-1.61114	0.0408125	-0.165387	-0.203617	-0.184502
22*		S	TNFSF15	9966		0.620429	0.526923	0.573676	-0.241333	-1.8741	-1.31065	-1.58366	-2.01315	-1.79841	0.214746	-0.180892	-0.407561	-0.294227
20*		S	MAML2	84441		0.497993	0.649683	0.573838	-0.241211	-1.87323	-1.31026	-1.70612	-1.37896	-1.54254	0.163584	-0.224177	-0.0622883	-0.143232
32*		S	RPL3	6122		0.537376	0.61056	0.573968	-0.241112	-1.87253	-1.30994	-1.76933	-1.82702	-1.79818	0.0288487	-0.367177	-0.325854	-0.346515
55*		S	KCTD19	146212		0.596447	0.551729	0.574088	-0.241022	-1.87188	-1.30965	-1.82289	-1.67805	-1.75047	0.0724202	-0.286935	-0.181789	-0.234362
57*		S	LOC200321	200321		0.548539	0.60027	0.574404	-0.240782	-1.87017	-1.30887	-2.07476	-1.58302	-1.82889	0.24587	-0.479607	-0.245251	-0.362429
58*		S	CDY2B	203611		0.54138	0.607488	0.574434	-0.24076	-1.87001	-1.3088	-1.6549	-1.87333	-1.76412	0.109215	-0.23511	-0.306496	-0.270803
39*		S	N6AMT1	29104		0.551672	0.597317	0.574495	-0.240714	-1.86969	-1.30865	-2.01253	-1.67273	-1.84263	0.169899	-0.414543	-0.326066	-0.370305
38*		S	GGA1	26088		0.573724	0.576046	0.574885	-0.240419	-1.86758	-1.3077	-1.90557	-1.67797	-1.79177	0.113801	-0.367465	-0.224987	-0.296226
43*		S	KLHL7	55975		0.553556	0.596741	0.575148	-0.24022	-1.86616	-1.30705	-1.68456	-1.84746	-1.76601	0.0814491	-0.168121	-0.389795	-0.278958
43*		S	TRIM36	55521		0.747084	0.403213	0.575148	-0.24022	-1.86616	-1.30705	-1.5254	-2.00909	-1.76725	0.241845	-0.0616576	-0.520247	-0.290952
67*		S	LOC389390	389390		0.514759	0.636193	0.575476	-0.239973	-1.8644	-1.30625	-1.73184	-1.90054	-1.81619	0.0843473	-0.196339	-0.381952	-0.289146
39*		S	DKFZP434P211	29774		0.52106	0.630193	0.575627	-0.239859	-1.86359	-1.30589	-2.04129	-1.64641	-1.84385	0.197443	-0.434602	-0.301831	-0.368217
38*		S	PPIL2	23759		0.61541	0.535965	0.575688	-0.239813	-1.86326	-1.30574	-1.86956	-1.71165	-1.79061	0.0789565	-0.341186	-0.250788	-0.295987
41*		S	ERRFI1	54206		0.495011	0.656843	0.575927	-0.239633	-1.86197	-1.30515	-1.79486	-1.64192	-1.71839	0.0764681	-0.411133	-0.138564	-0.274848
26*		S	GLIPR1	11010		0.564001	0.587931	0.575966	-0.239603	-1.86176	-1.30506	-1.73784	-1.91828	-1.82806	0.0902208	-0.236311	-0.3823	-0.309305
40*		S	AMZ2	51321		0.618854	0.533277	0.576066	-0.239528	-1.86123	-1.30481	-1.54767	-1.84713	-1.6974	0.149732	-0.211852	-0.356524	-0.284188
12*		S	FOXJ2	55810		0.462445	0.690753	0.576599	-0.239126	-1.85836	-1.30351	-1.79768	-1.45922	-1.62845	0.169232	-0.622127	-0.0447404	-0.333433
32*		S	SLC7A2	6542		0.507694	0.64557	0.576632	-0.239101	-1.85818	-1.30343	-1.79302	-1.7979	-1.79546	0.00243908	-0.387563	-0.30408	-0.345822
38*		S	CCDC28A	25901		0.628446	0.52579	0.577118	-0.238735	-1.85557	-1.30224	-1.8583	-1.7202	-1.78925	0.0690511	-0.332968	-0.257338	-0.295153
20*		S	ANGPT1	284		0.4909	0.664095	0.577497	-0.23845	-1.85354	-1.30131	-1.71186	-1.3689	-1.54038	0.17148	-0.228378	-0.0528831	-0.14063
37*		S	FREQ	23413		0.559174	0.595875	0.577524	-0.23843	-1.85339	-1.30125	-1.63469	-1.7487	-1.6917	0.0570012	-0.29746	-0.274145	-0.285802
18*		S	RAP1GDS1	5910		0.618305	0.536819	0.577562	-0.238401	-1.85319	-1.30115	-1.88558	-2.17513	-2.03035	0.144775	-0.200231	-0.38656	-0.293395
51*		S	HS6ST2	90161		0.591407	0.564075	0.577741	-0.238267	-1.85223	-1.30072	-1.76061	-2.07275	-1.91668	0.15607	-0.238665	-0.442274	-0.340469
28*		S	WNT5A	7474		0.567126	0.589834	0.57848	-0.237712	-1.84827	-1.29891	-1.5962	-1.68867	-1.64243	0.0462353	-0.242683	-0.212734	-0.227708
20*		S	SKAP2	8935		0.558624	0.598977	0.578801	-0.237471	-1.84656	-1.29813	-1.65712	-1.41435	-1.53573	0.121388	-0.188267	-0.0953788	-0.141823
58*		S	LASS6	253782		0.623956	0.534418	0.579187	-0.237181	-1.84449	-1.29718	-1.5825	-1.93495	-1.75872	0.176225	-0.176412	-0.348663	-0.262538
43*		S	C4orf43	55319		0.598813	0.559583	0.579198	-0.237173	-1.84443	-1.29715	-1.64734	-1.87849	-1.76292	0.115576	-0.143224	-0.414842	-0.279033
38*		S	ZIM2	23619		0.629823	0.529274	0.579549	-0.23691	-1.84256	-1.2963	-1.85711	-1.71727	-1.78719	0.06992	-0.3321	-0.255095	-0.293597
40*		TR	MOCK+	0		0.68104	0.478491	0.579766	-0.236748	-1.8414	-1.29577	-1.49874	-1.89477	-1.69675	0.198013	-0.167317	-0.392808	-0.280062
59*		S	LOC283332	283332		0.600289	0.559368	0.579828	-0.2367	-1.84106	-1.29561	-1.55361	-1.78247	-1.66804	0.114429	-0.235598	-0.364449	-0.300024
66*		S	LOC400960	400960		0.55206	0.607792	0.579926	-0.236627	-1.84054	-1.29537	-1.68453	-1.67192	-1.67823	0.00630209	-0.3666	-0.296156	-0.331378
68*		S	FLJ37035	399821		0.65277	0.507301	0.580036	-0.236545	-1.83995	-1.29511	-1.42501	-1.77541	-1.60021	0.175201	-0.134037	-0.237361	-0.185699
43*		S	PSENEN	55851		0.678689	0.482218	0.580453	-0.236233	-1.83772	-1.29409	-1.58165	-1.94311	-1.76238	0.180729	-0.0992829	-0.466992	-0.283137
51*		S	KIAA1731	85459		0.663989	0.496989	0.580489	-0.236206	-1.83753	-1.294	-1.69073	-2.14271	-1.91672	0.225989	-0.189881	-0.489317	-0.339599
17*		S	2024-09-04	5414		0.571085	0.590185	0.580635	-0.236097	-1.83675	-1.29364	-1.8894	-1.72701	-1.8082	0.0811957	-0.420986	-0.273646	-0.347316
22*		S	CLDN11	5010		0.658373	0.503959	0.581166	-0.2357	-1.83392	-1.29234	-1.5541	-2.03498	-1.79454	0.240441	-0.156899	-0.42251	-0.289704
37*		S	JMJD3	23135		0.557033	0.605503	0.581268	-0.235624	-1.83338	-1.29209	-1.63648	-1.74133	-1.6889	0.0524272	-0.299109	-0.268548	-0.283828
31*		S	A1CF	29974		0.603892	0.558682	0.581287	-0.235609	-1.83328	-1.29205	-1.98349	-1.59405	-1.78877	0.194721	-0.355258	-0.220197	-0.287728
37*		S	SMG5	23381		0.59305	0.569697	0.581373	-0.235545	-1.83282	-1.29184	-1.60649	-1.76872	-1.68761	0.0811152	-0.271368	-0.289364	-0.280366
46*		S	SOX17	64321		0.509549	0.653262	0.581406	-0.235521	-1.83265	-1.29176	-1.65413	-1.55585	-1.60499	0.0491386	-0.166916	-0.191	-0.178958
50*		S	RNASE7	84659		0.562675	0.60034	0.581507	-0.235445	-1.8321	-1.29151	-1.513	-1.74054	-1.62677	0.113767	-0.172238	-0.287478	-0.229858
36*		S	MRPL3	11222		0.656992	0.506507	0.58175	-0.235264	-1.83081	-1.29092	-1.67409	-1.84552	-1.75981	0.0857109	-0.200583	-0.253654	-0.227118
50*		S	C22orf23	84645		0.514911	0.649661	0.582286	-0.234864	-1.82796	-1.28961	-1.55059	-1.69749	-1.62404	0.0734536	-0.205934	-0.253598	-0.229766
42*		S	PIGG	54872		0.559658	0.605354	0.582506	-0.2347	-1.82679	-1.28907	-1.60256	-1.61823	-1.6104	0.00783374	-0.170368	-0.269622	-0.219995
8*		S	GPR37L1	9283		0.622571	0.543369	0.58297	-0.234354	-1.82432	-1.28793	-1.60518	-1.74488	-1.67503	0.0698497	-0.203381	-0.309303	-0.256342
15*		S	LGMN	5641		0.687808	0.478327	0.583067	-0.234281	-1.82381	-1.28769	-1.65581	-1.7477	-1.70175	0.0459424	-0.210116	-0.306033	-0.258075
40*		S	CUTC	51076		0.66214	0.504595	0.583368	-0.234058	-1.82221	-1.28696	-1.51361	-1.87207	-1.69284	0.179229	-0.180852	-0.375519	-0.278186
41*		S	KLHDC4	54758		0.522534	0.645133	0.583834	-0.233711	-1.81974	-1.28582	-1.7724	-1.65154	-1.71197	0.0604284	-0.391287	-0.144978	-0.268133
68*		S	LOC389660	389660		0.686911	0.480847	0.583879	-0.233677	-1.8195	-1.28571	-1.40135	-1.79782	-1.59959	0.198236	-0.110556	-0.252596	-0.181576
33*		S	SEMA7A	8482		0.522774	0.64517	0.583972	-0.233608	-1.819	-1.28548	-1.87103	-1.75797	-1.8145	0.0565299	-0.411337	-0.170852	-0.291094
42*		S	SLC25A36	55186		0.502336	0.66568	0.584008	-0.233581	-1.81881	-1.2854	-1.64369	-1.56723	-1.60546	0.0382309	-0.202144	-0.223284	-0.212714
20*		S	PPP2R5D	5528		0.517631	0.650551	0.584091	-0.233519	-1.81837	-1.28519	-1.69025	-1.37835	-1.5343	0.155952	-0.212546	-0.0617218	-0.137134
15*		S	ACOT11	26027		0.672863	0.495989	0.584426	-0.23327	-1.8166	-1.28437	-1.66957	-1.73407	-1.70182	0.0322532	-0.220714	-0.295071	-0.257892
50*		S	KIRREL3	84623		0.649454	0.519881	0.584668	-0.233091	-1.81532	-1.28378	-1.44472	-1.81075	-1.62774	0.183018	-0.111018	-0.342749	-0.226883
44*		S	SPIRE1	56907		0.62123	0.548181	0.584705	-0.233063	-1.81512	-1.28369	-2.08348	-1.79905	-1.94127	0.142211	-0.533654	-0.266068	-0.399861
40*		S	TXNDC11	51061		0.619056	0.550437	0.584746	-0.233032	-1.8149	-1.28359	-1.54751	-1.83221	-1.68986	0.142351	-0.211707	-0.345159	-0.278433
41*		S	RAB39	54734		0.55133	0.618305	0.584817	-0.23298	-1.81452	-1.28342	-1.7489	-1.67358	-1.71124	0.0376604	-0.370524	-0.159672	-0.265098
21*		S	FEM1B	10116		0.582755	0.586986	0.58487	-0.23294	-1.81424	-1.28329	-1.65319	-1.64135	-1.64727	0.00592139	-0.268962	-0.189476	-0.229219
32*		S	RPL6	6128		0.528777	0.641415	0.585096	-0.232773	-1.81305	-1.28274	-1.77619	-1.80136	-1.78878	0.012583	-0.373083	-0.306665	-0.339874
11*		S	LMAN1	3998		0.420811	0.749402	0.585106	-0.232765	-1.81299	-1.28271	-1.75336	-1.65835	-1.70586	0.0475034	-0.300561	-0.254308	-0.277435
62*		S	C6orf126	389383		0.633885	0.536506	0.585195	-0.232699	-1.81252	-1.28249	-1.53582	-1.72955	-1.63268	0.0968639	-0.195893	-0.374832	-0.285363
27*		S	IGF2AS	51214		0.675328	0.49568	0.585504	-0.23247	-1.81089	-1.28174	-1.50659	-1.86911	-1.68785	0.18126	-0.0917672	-0.311102	-0.201435
27*		S	PSTPIP2	9050		0.532269	0.639322	0.585796	-0.232254	-1.80935	-1.28103	-1.62236	-1.72035	-1.67135	0.0489943	-0.180155	-0.208072	-0.194113
44*		S	OTUD7B	56957		0.63487	0.536961	0.585916	-0.232165	-1.80871	-1.28073	-2.06897	-1.80807	-1.93852	0.130451	-0.522564	-0.27235	-0.397457
63*		S	LOC149224	149224		0.636533	0.535347	0.58594	-0.232147	-1.80858	-1.28067	-1.71709	-1.88982	-1.80345	0.0863674	-0.279054	-0.396448	-0.337751
65*		S	LOC400807	400807		0.614067	0.557972	0.58602	-0.232088	-1.80816	-1.28048	-1.65112	-1.65885	-1.65498	0.00386365	-0.342221	-0.143712	-0.242967
64*		S	LOC344709	344709		0.618631	0.553652	0.586141	-0.231998	-1.80752	-1.28018	-1.87006	-1.67495	-1.77251	0.0975533	-0.334131	-0.197726	-0.265929
39*		S	ZNF544	27300		0.535461	0.637059	0.58626	-0.23191	-1.80689	-1.27989	-2.02776	-1.64091	-1.83434	0.193427	-0.425166	-0.29677	-0.360968
66*		S	LOC400958	400958		0.610532	0.562262	0.586397	-0.231808	-1.80617	-1.27955	-1.63544	-1.70597	-1.6707	0.0352631	-0.319351	-0.326023	-0.322687
19*		S	DUSP13	51207		0.62027	0.552648	0.586459	-0.231762	-1.80584	-1.2794	-1.71407	-1.65119	-1.68263	0.0314418	-0.228532	-0.230781	-0.229656
46*		S	C11orf48	79081		0.67967	0.493268	0.586469	-0.231755	-1.80579	-1.27938	-1.52422	-1.67986	-1.60204	0.0778219	-0.0756875	-0.299093	-0.18739
49*		S	C17orf37	84299		0.497065	0.67603	0.586547	-0.231697	-1.80537	-1.27919	-1.79055	-1.50064	-1.64559	0.144954	-0.222903	-0.192439	-0.207671
20*		S	DCC	1630		0.509782	0.66359	0.586686	-0.231594	-1.80464	-1.27885	-1.6966	-1.36925	-1.53292	0.163674	-0.217194	-0.0532126	-0.135203
46*		S	STRA6	64220		0.579459	0.594244	0.586851	-0.231472	-1.80377	-1.27844	-1.60074	-1.6016	-1.60117	0.00042649	-0.129426	-0.230873	-0.18015
18*		S	EP300	2033		0.658643	0.515305	0.586974	-0.231381	-1.80312	-1.27814	-1.83778	-2.19882	-2.0183	0.180515	-0.175527	-0.39982	-0.287673
37*		S	FTSJD2	23070		0.520961	0.653548	0.587255	-0.231174	-1.80164	-1.27746	-1.66651	-1.70458	-1.68554	0.0190349	-0.326892	-0.240617	-0.283755
21*		S	EDA	1896		0.617048	0.557501	0.587275	-0.231159	-1.80154	-1.27741	-1.62505	-1.66544	-1.64525	0.0201985	-0.244661	-0.207478	-0.22607
21*		S	CSF3R	1441		0.684116	0.490476	0.587296	-0.231143	-1.80142	-1.27736	-1.57001	-1.72022	-1.64511	0.075107	-0.197136	-0.248402	-0.222769
32*		S	SYP	6855		0.606819	0.56781	0.587314	-0.231129	-1.80133	-1.27731	-1.71389	-1.86259	-1.78824	0.074349	-0.319483	-0.352441	-0.335962
61*		S	GPR144	347088		0.658508	0.516186	0.587347	-0.231105	-1.80115	-1.27723	-1.51315	-1.94893	-1.73104	0.217891	-0.267194	-0.491511	-0.379353
59*		S	C15orf55	256646		0.568681	0.60602	0.58735	-0.231103	-1.80114	-1.27722	-1.57899	-1.74474	-1.66187	0.0828721	-0.259801	-0.33346	-0.296631
11*		S	PNRC1	10957		0.589493	0.58537	0.587431	-0.231043	-1.80071	-1.27703	-1.60446	-1.79828	-1.70137	0.0969077	-0.182708	-0.371218	-0.276963
57*		S	APCDD1L	164284		0.67634	0.498922	0.587631	-0.230895	-1.79966	-1.27654	-1.95717	-1.66123	-1.8092	0.147971	-0.397117	-0.317482	-0.357299
43*		S	MESP1	55897		0.671459	0.504	0.58773	-0.230823	-1.79914	-1.2763	-1.58759	-1.92491	-1.75625	0.16866	-0.10326	-0.452309	-0.277785
25*		S	CRYBA4	1413		0.659894	0.515835	0.587865	-0.230723	-1.79843	-1.27597	-1.76777	-1.7496	-1.75868	0.00908596	-0.345605	-0.38634	-0.365972
30*		S	MR1	3140		0.600645	0.575088	0.587866	-0.230721	-1.79842	-1.27596	-1.75713	-1.74109	-1.74911	0.00801827	-0.370685	-0.206134	-0.28841
8*		S	EDG6	8698		0.647792	0.528345	0.588068	-0.230572	-1.79735	-1.27547	-1.58355	-1.75837	-1.67096	0.087409	-0.185537	-0.318784	-0.252161
54*		S	AP1S3	130340		0.605847	0.571152	0.588499	-0.230254	-1.79508	-1.27441	-1.60338	-1.62544	-1.61441	0.0110311	-0.170953	-0.252559	-0.211756
41*		S	STAG3L1	54441		0.542307	0.6347	0.588503	-0.230251	-1.79506	-1.27441	-1.75626	-1.66011	-1.70819	0.0480755	-0.37703	-0.150692	-0.263861
40*		S	TMEM85	51234		0.558324	0.618742	0.588533	-0.230229	-1.79491	-1.27433	-1.59529	-1.77282	-1.68406	0.0887647	-0.255201	-0.299921	-0.277561
54*		S	H1FOO	132243		0.631888	0.545391	0.588639	-0.230151	-1.79435	-1.27407	-1.58197	-1.64416	-1.61306	0.031091	-0.154423	-0.268922	-0.211673
58*		S	C7orf62	219557		0.685255	0.492256	0.588755	-0.230065	-1.79373	-1.27379	-1.52875	-1.9705	-1.74963	0.220875	-0.132839	-0.372994	-0.252917
44*		S	FLJ20209	57245		0.621045	0.556741	0.588893	-0.229964	-1.79301	-1.27345	-2.08367	-1.79218	-1.93792	0.14575	-0.533805	-0.261275	-0.39754
31*		S	NUFIP2	57532		0.60117	0.577052	0.589111	-0.229803	-1.79186	-1.27292	-1.98603	-1.5807	-1.78337	0.202665	-0.356918	-0.208634	-0.282776
58*		S	C6orf146	222826		0.572359	0.606128	0.589244	-0.229705	-1.79117	-1.2726	-1.62774	-1.87448	-1.75111	0.123369	-0.213089	-0.307281	-0.260185
20*		S	KCNH4	23415		0.503722	0.674789	0.589256	-0.229696	-1.79111	-1.27257	-1.70149	-1.36143	-1.53146	0.170031	-0.220784	-0.0459042	-0.133344
31*		S	ORC5L	5001		0.648001	0.530554	0.589278	-0.22968	-1.79099	-1.27251	-1.94232	-1.61449	-1.7784	0.163917	-0.328359	-0.237902	-0.283131
63*		S	LOC283710	283710		0.689248	0.489664	0.589456	-0.229549	-1.79005	-1.27208	-1.66972	-1.9266	-1.79816	0.12844	-0.241219	-0.42505	-0.333135
47*		S	CBLL1	79872		0.596735	0.582328	0.589531	-0.229493	-1.78965	-1.27189	-1.752	-1.51597	-1.63398	0.118012	-0.215191	-0.172499	-0.193845
13*		S	FOXK2	3607		0.344271	0.834811	0.589541	-0.229486	-1.7896	-1.27187	-2.04035	-1.50494	-1.77265	0.267705	-0.497721	-0.137457	-0.317589
42*		S	C14orf105	55195		0.530874	0.648969	0.589921	-0.229206	-1.78761	-1.27094	-1.62322	-1.58136	-1.60229	0.0209288	-0.186324	-0.23612	-0.211222
21*		S	ITGB3	3690		0.58562	0.594461	0.59004	-0.229118	-1.78698	-1.27065	-1.65084	-1.63524	-1.64304	0.00780031	-0.266931	-0.184912	-0.225922
40*		S	NDUFA13	51079		0.557828	0.623268	0.590548	-0.228745	-1.78432	-1.26941	-1.59568	-1.76889	-1.68228	0.086602	-0.255556	-0.296923	-0.27624
21*		S	CKLF	51192		0.559731	0.621427	0.590579	-0.228722	-1.78416	-1.26933	-1.67208	-1.6132	-1.64264	0.0294425	-0.285277	-0.168447	-0.226862
27*		S	PRC1	9055		0.679482	0.501731	0.590607	-0.228702	-1.78401	-1.26926	-1.50323	-1.86284	-1.68304	0.179807	-0.0892007	-0.306762	-0.197981
30*		S	HSD17B10	3028		0.602255	0.57936	0.590808	-0.228554	-1.78296	-1.26877	-1.75576	-1.73746	-1.74661	0.00915102	-0.369493	-0.203713	-0.286603
66*		S	LOC400985	400985		0.607919	0.573915	0.590917	-0.228474	-1.78238	-1.2685	-1.63763	-1.69725	-1.66744	0.0298098	-0.321462	-0.318379	-0.319921
15*		S	UBASH3A	53347		0.441673	0.740298	0.590986	-0.228423	-1.78202	-1.26834	-1.88238	-1.54565	-1.71402	0.168362	-0.384653	-0.143437	-0.264045
43*		S	METTL2B	55798		0.672516	0.509472	0.590994	-0.228417	-1.78198	-1.26832	-1.58673	-1.92034	-1.75353	0.166809	-0.102679	-0.448621	-0.27565
13*		S	POU3F1	5453		0.702079	0.479953	0.591016	-0.228401	-1.78186	-1.26826	-1.72663	-1.80418	-1.76541	0.0387715	-0.258937	-0.3912	-0.325069
31*		S	ODF2	4957		0.555617	0.626432	0.591024	-0.228395	-1.78182	-1.26824	-2.02855	-1.54483	-1.78669	0.241863	-0.384698	-0.177552	-0.281125
25*		S	CLN3	1201		0.593307	0.588907	0.591107	-0.228334	-1.78139	-1.26804	-1.8252	-1.6885	-1.75685	0.0683533	-0.393341	-0.331506	-0.362423
59*		S	SCML4	256380		0.583341	0.599363	0.591352	-0.228154	-1.7801	-1.26744	-1.56722	-1.75012	-1.65867	0.0914508	-0.248576	-0.337882	-0.293229
22*		S	NOV	4856		0.585483	0.597623	0.591553	-0.228006	-1.77905	-1.26695	-1.61088	-1.94594	-1.77841	0.167529	-0.20299	-0.361538	-0.282264
42*		S	RNF43	54894		0.678075	0.506496	0.592286	-0.227469	-1.77522	-1.26516	-1.5176	-1.70181	-1.6097	0.0921044	-0.104725	-0.345559	-0.225142
8*		S	CCR9	10803		0.645703	0.539006	0.592355	-0.227418	-1.77486	-1.26499	-1.58534	-1.7488	-1.66707	0.0817283	-0.187015	-0.312056	-0.249536
30*		S	GNL1	2794		0.525095	0.659631	0.592363	-0.227412	-1.77481	-1.26497	-1.82137	-1.66916	-1.74527	0.0761017	-0.426656	-0.158228	-0.292442
38*		S	RHBDD3	25807		0.584957	0.599909	0.592433	-0.227361	-1.77445	-1.2648	-1.89587	-1.65792	-1.7769	0.118974	-0.360384	-0.209625	-0.285005
54*		S	EMB	133418		0.649668	0.535364	0.592516	-0.2273	-1.77401	-1.2646	-1.56736	-1.65144	-1.6094	0.0420402	-0.143137	-0.275292	-0.209214
27*		S	PELP1	27043		0.60337	0.58174	0.592555	-0.227271	-1.77381	-1.2645	-1.56482	-1.77998	-1.6724	0.10758	-0.136226	-0.249374	-0.1928
48*		S	CFHR5	81494		0.684902	0.500268	0.592585	-0.227249	-1.77365	-1.26443	-1.61605	-1.93341	-1.77473	0.158676	-0.225219	-0.595574	-0.410396
38*		S	COBRA1	25920		0.566872	0.618791	0.592831	-0.227069	-1.77236	-1.26382	-1.91149	-1.64206	-1.77677	0.134719	-0.371785	-0.19747	-0.284628
33*		S	HIST1H4G	8369		0.502005	0.683718	0.592862	-0.227047	-1.77221	-1.26375	-1.88905	-1.72397	-1.80651	0.0825373	-0.425937	-0.150658	-0.288298
56*		S	CPNE9	151835		0.608481	0.577615	0.593048	-0.22691	-1.77123	-1.2633	-1.62532	-1.57953	-1.60242	0.0228951	-0.251501	-0.126014	-0.188758
41*		S	OTUD4	54726		0.5008	0.685392	0.593096	-0.226875	-1.77098	-1.26318	-1.79014	-1.61848	-1.70431	0.0858309	-0.406958	-0.122927	-0.264943
30*		S	GRN	2896		0.60611	0.580951	0.59353	-0.226557	-1.76871	-1.26212	-1.75248	-1.7361	-1.74429	0.00818885	-0.366637	-0.202812	-0.284724
42*		S	WDYHV1	55093		0.627816	0.559313	0.593565	-0.226532	-1.76854	-1.26203	-1.55366	-1.65715	-1.60541	0.0517477	-0.132586	-0.304988	-0.218787
69*		S	LOC387883	387883		0.577511	0.609882	0.593696	-0.226436	-1.76785	-1.26171	-1.74851	-2.01261	-1.88056	0.132047	-0.380936	-0.440235	-0.410586
31*		S	ABCA10	10349		0.621192	0.566245	0.593719	-0.226419	-1.76773	-1.26166	-1.96734	-1.58855	-1.77795	0.189395	-0.344708	-0.215436	-0.280072
63*		S	C1orf70	339453		0.650628	0.537466	0.594047	-0.226179	-1.76602	-1.26085	-1.70442	-1.88811	-1.79627	0.0918466	-0.268938	-0.395121	-0.332029
70*		S	LOC400604	400604		0.624547	0.56365	0.594098	-0.226142	-1.76575	-1.26073	-1.541	-1.72531	-1.63316	0.0921579	-0.115575	-0.309395	-0.212485
60*		S	LOC285924	285924		0.552687	0.635765	0.594226	-0.226048	-1.76509	-1.26042	-1.66605	-1.58949	-1.62777	0.0382781	-0.121657	-0.199489	-0.160573
47*		S	RIN3	79890		0.585248	0.603255	0.594252	-0.22603	-1.76495	-1.26035	-1.7616	-1.50071	-1.63116	0.130447	-0.221532	-0.159024	-0.190278
67*		S	LOC402205	402205		0.582783	0.606724	0.594754	-0.225663	-1.76234	-1.25913	-1.67932	-1.92775	-1.80354	0.124212	-0.161811	-0.40219	-0.282001
64*		S	NOTO	344022		0.691571	0.498122	0.594846	-0.225595	-1.76185	-1.2589	-1.79808	-1.71621	-1.75714	0.0409339	-0.282263	-0.227767	-0.255015
31*		S	ABCA12	26154		0.665435	0.524878	0.595156	-0.225369	-1.76024	-1.25814	-1.92605	-1.61861	-1.77233	0.153719	-0.317728	-0.241474	-0.279601
38*		S	CNOT10	25904		0.610351	0.580167	0.595259	-0.225294	-1.75971	-1.25789	-1.87393	-1.67451	-1.77422	0.0997118	-0.344375	-0.222334	-0.283354
61*		S	ACSM2B	348158		0.617527	0.573469	0.595498	-0.22512	-1.75846	-1.25731	-1.54506	-1.89789	-1.72148	0.176415	-0.300235	-0.449203	-0.374719
51*		S	KRTAP9-4	85280		0.613274	0.578514	0.595894	-0.224831	-1.7564	-1.25634	-1.73956	-2.0577	-1.89863	0.159069	-0.223968	-0.432149	-0.328058
44*		S	LGALS14	56891		0.634423	0.55737	0.595897	-0.224829	-1.75639	-1.25633	-2.06945	-1.79167	-1.93056	0.13889	-0.522927	-0.260922	-0.391925
30*		S	KLRC3	3823		0.548656	0.643712	0.596184	-0.22462	-1.7549	-1.25563	-1.80133	-1.68271	-1.74202	0.059313	-0.409201	-0.167249	-0.288225
60*		S	RPL7L1	285855		0.623755	0.568637	0.596196	-0.224611	-1.75483	-1.2556	-1.60881	-1.64075	-1.62478	0.0159722	-0.0870071	-0.242423	-0.164715
20*		S	ROBO1	6091		0.51863	0.673975	0.596302	-0.224533	-1.75428	-1.25534	-1.68945	-1.362	-1.52572	0.163723	-0.211954	-0.0464354	-0.129195
44*		S	UBQLN4	56893		0.620164	0.572544	0.596354	-0.224496	-1.75401	-1.25521	-2.08461	-1.77947	-1.93204	0.152569	-0.534521	-0.252426	-0.393473
10*		S	ADD2	119		0.486749	0.70647	0.59661	-0.22431	-1.75269	-1.25459	-1.73624	-1.73795	-1.73709	0.000855515	-0.283507	-0.29011	-0.286809
18*		S	RANGAP1	5905		0.621319	0.572211	0.596765	-0.224197	-1.75188	-1.25421	-1.882	-2.13616	-2.00908	0.127076	-0.198385	-0.364745	-0.281565
31*		S	NVL	4931		0.612184	0.581519	0.596851	-0.224134	-1.75143	-1.254	-1.97575	-1.57746	-1.7766	0.199148	-0.350202	-0.205822	-0.278012
41*		S	NUB1	51667		0.50648	0.687238	0.596859	-0.224128	-1.75139	-1.25398	-1.7855	-1.61696	-1.70123	0.0842714	-0.402863	-0.121916	-0.262389
20*		S	CD300LB	124599		0.646832	0.547367	0.5971	-0.223953	-1.75014	-1.25339	-1.58583	-1.45037	-1.5181	0.0677324	-0.136024	-0.129059	-0.132541
58*		S	C11orf45	219833		0.527459	0.666846	0.597152	-0.223915	-1.74987	-1.25326	-1.66711	-1.82328	-1.74519	0.0780847	-0.245005	-0.272242	-0.258624
38*		S	FJX1	24147		0.540382	0.653994	0.597188	-0.223889	-1.74969	-1.25317	-1.93438	-1.61248	-1.77343	0.16095	-0.388484	-0.174809	-0.281647
52*		S	ESAM	90952		0.691968	0.502693	0.59733	-0.223785	-1.74895	-1.25283	-1.51988	-1.72128	-1.62058	0.100703	-0.152962	-0.199868	-0.176415
56*		S	C5orf38	153571		0.680629	0.51467	0.597649	-0.223553	-1.74729	-1.25205	-1.56661	-1.62982	-1.59822	0.0316062	-0.20023	-0.161044	-0.180637
34*		S	RPH3AL	9501		0.599282	0.596075	0.597679	-0.223532	-1.74714	-1.25197	-1.90691	-1.64348	-1.7752	0.131713	-0.362752	-0.190741	-0.276747
8*		S	BDKRB2	624		0.550692	0.644855	0.597773	-0.223463	-1.74665	-1.25174	-1.66684	-1.65379	-1.66031	0.00652496	-0.254234	-0.245259	-0.249747
31*		S	OMG	4974		0.631299	0.564291	0.597795	-0.223448	-1.74654	-1.25169	-1.95791	-1.58997	-1.77394	0.183968	-0.338545	-0.216666	-0.277605
70*		S	LOC388526	388526		0.566848	0.628832	0.59784	-0.223415	-1.74631	-1.25158	-1.5834	-1.66934	-1.62637	0.0429698	-0.147679	-0.262889	-0.205284
70*		S	LOC388338	388338		0.656341	0.539376	0.597858	-0.223402	-1.74621	-1.25153	-1.51763	-1.74616	-1.63189	0.114263	-0.0978843	-0.326714	-0.212299
61*		S	FLJ43950	347127		0.624914	0.571564	0.598239	-0.223125	-1.74424	-1.2506	-1.53931	-1.89959	-1.71945	0.180139	-0.294279	-0.45061	-0.372444
40*		S	SCAND1	51282		0.703535	0.492957	0.598246	-0.22312	-1.7442	-1.25059	-1.48104	-1.88219	-1.68161	0.200573	-0.151207	-0.383227	-0.267217
59*		S	HMCN2	256158		0.694352	0.502339	0.598345	-0.223048	-1.74369	-1.25034	-1.47807	-1.82859	-1.65333	0.175262	-0.163572	-0.402331	-0.282951
48*		S	C2orf44	80304		0.657405	0.539567	0.598486	-0.222946	-1.74296	-1.25	-1.63946	-1.89996	-1.76971	0.130254	-0.244977	-0.563766	-0.404371
69*		S	LOC401732	401732		0.581818	0.615636	0.598727	-0.222771	-1.74171	-1.24941	-1.74502	-2.00746	-1.87624	0.131216	-0.37784	-0.436512	-0.407176
36*		S	SLCO2B1	11309		0.695382	0.502157	0.598769	-0.22274	-1.74149	-1.24931	-1.64288	-1.84919	-1.74604	0.103156	-0.177677	-0.255983	-0.21683
17*		S	PCCA	5095		0.634074	0.563596	0.598835	-0.222693	-1.74115	-1.24915	-1.83276	-1.74797	-1.79037	0.0423947	-0.375511	-0.290062	-0.332787
16*		S	DCLRE1A	9937		0.637911	0.559789	0.59885	-0.222682	-1.74108	-1.24911	-1.89225	-1.63227	-1.76226	0.129988	-0.413154	-0.283608	-0.348381
58*		S	FAM26D	221301		0.668253	0.529647	0.59895	-0.222609	-1.74056	-1.24887	-1.54366	-1.93897	-1.74132	0.197656	-0.144925	-0.351417	-0.248171
69*		S	LOC387872	387872		0.804893	0.393272	0.599082	-0.222513	-1.73987	-1.24854	-1.56427	-2.20655	-1.88541	0.321139	-0.217499	-0.580419	-0.398959
30*		S	LAMA5	3911		0.607913	0.590328	0.59912	-0.222486	-1.73968	-1.24845	-1.75095	-1.72812	-1.73954	0.0114111	-0.365301	-0.197498	-0.2814
16*		S	TBL1X	6907		0.589413	0.609734	0.599573	-0.222158	-1.73734	-1.24734	-1.93464	-1.59308	-1.76386	0.170781	-0.446835	-0.247869	-0.347352
23*		S	GJB3	2707		0.554629	0.644522	0.599576	-0.222156	-1.73733	-1.24734	-1.39868	-1.66062	-1.52965	0.13097	-0.139698	-0.314138	-0.226918
11*		S	SELE	6401		0.580316	0.61902	0.599668	-0.222089	-1.73685	-1.24711	-1.61256	-1.76957	-1.69107	0.0785049	-0.18912	-0.347235	-0.268177
50*		S	ORAI1	84876		0.506998	0.69265	0.599824	-0.221976	-1.73604	-1.24673	-1.55681	-1.65998	-1.6084	0.0515819	-0.211517	-0.224067	-0.217792
38*		S	SLC39A6	25800		0.657161	0.543365	0.600263	-0.221658	-1.73378	-1.24566	-1.8335	-1.70543	-1.76946	0.0640318	-0.314866	-0.246024	-0.280445
51*		S	ATP6V1E2	90423		0.692897	0.507794	0.600345	-0.221599	-1.73335	-1.24545	-1.66289	-2.13144	-1.89717	0.234273	-0.170451	-0.48174	-0.326096
68*		S	LOC390192	390192		0.668105	0.532662	0.600383	-0.221571	-1.73316	-1.24536	-1.41439	-1.75393	-1.58416	0.169772	-0.12349	-0.222756	-0.173123
61*		S	AADACL2	344752		0.69258	0.508693	0.600637	-0.221388	-1.73185	-1.24474	-1.48662	-1.95561	-1.72111	0.234495	-0.239723	-0.497046	-0.368384
18*		S	SPINT2	10653		0.584316	0.617163	0.600739	-0.221314	-1.73132	-1.24449	-1.92584	-2.08666	-2.00625	0.0804076	-0.221047	-0.337037	-0.279042
18*		S	MYH3	4621		0.683065	0.518671	0.600868	-0.221221	-1.73066	-1.24418	-1.80885	-2.19511	-2.00198	0.193129	-0.16057	-0.397746	-0.279158
56*		S	FAM120AOS	158293		0.618933	0.582812	0.600873	-0.221218	-1.73063	-1.24417	-1.61681	-1.57538	-1.5961	0.0207188	-0.244073	-0.123122	-0.183598
40*		S	PRR16	51334		0.68844	0.513371	0.600905	-0.221194	-1.73046	-1.24409	-1.49292	-1.86444	-1.67868	0.18576	-0.162017	-0.369707	-0.265862
70*		S	LOC390754	390754		0.584906	0.617102	0.601004	-0.221123	-1.72996	-1.24384	-1.57013	-1.67942	-1.62477	0.0546419	-0.137631	-0.271258	-0.204445
23*		S	APOA1	335		0.654296	0.547943	0.60112	-0.221039	-1.72936	-1.24356	-1.32628	-1.74277	-1.53452	0.208242	-0.062374	-0.389473	-0.225924
59*		S	TMPRSS12	283471		0.680835	0.522764	0.6018	-0.220548	-1.72586	-1.2419	-1.48892	-1.81207	-1.6505	0.161575	-0.173923	-0.388763	-0.281343
37*		S	MED13L	23389		0.548846	0.654972	0.601909	-0.220469	-1.72529	-1.24163	-1.64329	-1.70349	-1.67339	0.0300971	-0.305415	-0.239789	-0.272602
66*		S	PRAMEF17	391004		0.703872	0.500616	0.602244	-0.220228	-1.72357	-1.24081	-1.55708	-1.75206	-1.65457	0.0974892	-0.243926	-0.366462	-0.305194
42*		S	THAP1	55145		0.496394	0.708275	0.602334	-0.220162	-1.72311	-1.24059	-1.64796	-1.53122	-1.58959	0.0583675	-0.205438	-0.190565	-0.198001
26*		S	GPAA1	8733		0.539266	0.665652	0.602459	-0.220073	-1.72247	-1.24029	-1.75993	-1.85202	-1.80597	0.0460441	-0.252175	-0.333473	-0.292824
59*		S	SYT14	255928		0.643821	0.561124	0.602472	-0.220063	-1.7224	-1.24025	-1.51865	-1.78105	-1.64985	0.1312	-0.202265	-0.363283	-0.282774
50*		S	SYTL1	84958		0.667188	0.537763	0.602476	-0.220061	-1.72238	-1.24025	-1.43076	-1.79515	-1.61296	0.182192	-0.0985072	-0.330465	-0.214486
40*		S	NOX4	50507		0.689495	0.515516	0.602506	-0.220039	-1.72223	-1.24017	-1.49209	-1.86257	-1.67733	0.185243	-0.161262	-0.368287	-0.264774
41*		S	FAM134B	54463		0.530856	0.674371	0.602614	-0.219961	-1.72167	-1.23991	-1.76561	-1.62753	-1.69657	0.0690406	-0.385287	-0.128964	-0.257125
36*		S	POLQ	10721		0.669147	0.53617	0.602658	-0.219929	-1.72144	-1.2398	-1.66421	-1.82043	-1.74232	0.078111	-0.19333	-0.23777	-0.21555
59*		S	CCDC110	256309		0.60749	0.598123	0.602807	-0.219822	-1.72068	-1.23944	-1.54783	-1.75113	-1.64948	0.101649	-0.230084	-0.338706	-0.284395
67*		S	LOC401307	401307		0.61233	0.593506	0.602918	-0.219742	-1.72011	-1.23917	-1.65651	-1.93995	-1.79823	0.141721	-0.146813	-0.411268	-0.279041
68*		S	LOC389624	389624		0.584729	0.621214	0.602971	-0.219703	-1.71983	-1.23903	-1.47216	-1.67891	-1.57554	0.103375	-0.180832	-0.171761	-0.176297
56*		S	SLC16A14	151473		0.671492	0.534523	0.603008	-0.219677	-1.71965	-1.23895	-1.57405	-1.61396	-1.594	0.0199573	-0.206723	-0.149995	-0.178359
33*		S	ZSCAN20	7579		0.546767	0.659621	0.603194	-0.219543	-1.71869	-1.23849	-1.85022	-1.74523	-1.79772	0.0524956	-0.39447	-0.163281	-0.278876
17*		S	ADAMTS12	81792		0.70452	0.502358	0.603439	-0.219367	-1.71743	-1.23789	-1.76942	-1.79626	-1.78284	0.0134189	-0.324652	-0.327871	-0.326262
57*		S	KRTCAP3	200634		0.70485	0.502581	0.603715	-0.219168	-1.71601	-1.23722	-1.93094	-1.6584	-1.79467	0.136268	-0.378715	-0.314874	-0.346794
17*		S	CHMP1A	5119		0.62121	0.586332	0.603771	-0.219128	-1.71573	-1.23708	-1.84433	-1.73005	-1.78719	0.0571415	-0.384798	-0.276025	-0.330411
52*		S	SNX26	115703		0.687582	0.520211	0.603896	-0.219037	-1.71508	-1.23677	-1.52322	-1.7081	-1.61566	0.0924432	-0.155792	-0.190898	-0.173345
55*		S	PIK3R6	146850		0.678698	0.529394	0.604046	-0.21893	-1.71432	-1.23641	-1.75278	-1.69811	-1.72544	0.0273333	-0.237719	-0.195634	-0.216677
57*		S	MPZL3	196264		0.634887	0.573463	0.604175	-0.218837	-1.71366	-1.23609	-1.99531	-1.6037	-1.79951	0.195803	-0.423873	-0.264356	-0.344115
32*		S	SIGLEC1	6614		0.499545	0.70907	0.604307	-0.218742	-1.71298	-1.23577	-1.79953	-1.74508	-1.77231	0.0272246	-0.39316	-0.264589	-0.328874
21*		S	CCL16	6360		0.702473	0.506342	0.604407	-0.21867	-1.71246	-1.23552	-1.55494	-1.70725	-1.6311	0.0761561	-0.184128	-0.238714	-0.211421
48*		S	TSGA10	80705		0.552753	0.656606	0.60468	-0.218475	-1.71107	-1.23486	-1.72853	-1.80037	-1.76445	0.0359216	-0.320174	-0.469036	-0.394605
33*		S	MFAP5	8076		0.537587	0.672021	0.604804	-0.218385	-1.71043	-1.23455	-1.85818	-1.73429	-1.79624	0.0619456	-0.400924	-0.156786	-0.278855
21*		S	CORT	1325		0.692303	0.517417	0.60486	-0.218345	-1.71015	-1.23442	-1.56329	-1.6982	-1.63075	0.0674575	-0.191335	-0.231952	-0.211643
38*		S	FAM75A7	26165		0.548997	0.660879	0.604938	-0.218289	-1.70975	-1.23423	-1.92693	-1.60669	-1.76681	0.160121	-0.383053	-0.170377	-0.276715
25*		S	CCNB2	9133		0.666662	0.543619	0.60514	-0.218144	-1.70871	-1.23373	-1.76193	-1.72637	-1.74415	0.0177835	-0.340753	-0.36549	-0.353122
53*		S	IKIP	121457		0.536308	0.67411	0.605209	-0.218095	-1.70836	-1.23356	-1.69043	-1.83157	-1.761	0.0705721	-0.342315	-0.310255	-0.326285
54*		S	TEDDM1	127670		0.584065	0.626359	0.605212	-0.218092	-1.70834	-1.23356	-1.62128	-1.58533	-1.6033	0.017976	-0.184779	-0.21749	-0.201135
28*		S	SGCD	6444		0.659334	0.551506	0.60542	-0.217943	-1.70728	-1.23305	-1.52805	-1.71892	-1.62349	0.0954382	-0.181316	-0.234452	-0.207884
61*		S	MYLK4	340156		0.674523	0.536591	0.605557	-0.217845	-1.70658	-1.23271	-1.50068	-1.93075	-1.71572	0.215036	-0.254281	-0.476441	-0.365361
17*		S	SPO11	23626		0.581552	0.629616	0.605584	-0.217826	-1.70644	-1.23265	-1.87999	-1.69592	-1.78795	0.0920353	-0.413429	-0.2493	-0.331365
28*		S	RAPH1	65059		0.685533	0.526315	0.605924	-0.217582	-1.7047	-1.23182	-1.50868	-1.73881	-1.62375	0.115062	-0.16388	-0.248726	-0.206303
25*		S	CD2BP2	10421		0.592353	0.619685	0.606019	-0.217514	-1.70422	-1.23158	-1.82603	-1.66276	-1.74439	0.0816328	-0.394025	-0.30841	-0.351217
48*		S	GDPD5	81544		0.676007	0.536331	0.606169	-0.217406	-1.70345	-1.23122	-1.62362	-1.90272	-1.76317	0.139547	-0.23161	-0.566385	-0.398998
53*		S	CNTROB	116840		0.615135	0.597254	0.606194	-0.217388	-1.70332	-1.23116	-1.62511	-1.89845	-1.76178	0.13667	-0.282121	-0.358062	-0.320091
31*		S	A4GNT	51146		0.523163	0.689476	0.60632	-0.217298	-1.70268	-1.23085	-2.05884	-1.49902	-1.77893	0.279912	-0.40449	-0.13787	-0.27118
39*		S	C2orf30	27248		0.685141	0.527747	0.606444	-0.217209	-1.70204	-1.23055	-1.88713	-1.72844	-1.80778	0.0793413	-0.327087	-0.37735	-0.352219
65*		S	LOC400733	400733		0.564029	0.648999	0.606514	-0.217159	-1.70169	-1.23037	-1.69345	-1.58259	-1.63802	0.0554309	-0.383429	-0.0941101	-0.23877
56*		S	LOC151300	151300		0.533057	0.680351	0.606704	-0.217023	-1.70072	-1.22991	-1.68669	-1.49744	-1.59207	0.094626	-0.305101	-0.068841	-0.186971
42*		S	HCFC1R1	54985		0.520822	0.69268	0.606751	-0.216989	-1.70048	-1.2298	-1.63043	-1.54441	-1.58742	0.0430116	-0.191896	-0.202544	-0.19722
30*		S	GLE1	2733		0.619067	0.595895	0.607481	-0.216467	-1.69675	-1.22801	-1.74146	-1.72339	-1.73243	0.00903711	-0.357038	-0.194344	-0.275691
30*		S	LLGL2	3993		0.570219	0.644848	0.607533	-0.21643	-1.69648	-1.22788	-1.783	-1.68174	-1.73237	0.0506287	-0.393226	-0.166605	-0.279916
46*		S	YIPF2	78992		0.564058	0.651418	0.607738	-0.216284	-1.69544	-1.22738	-1.6125	-1.55728	-1.58489	0.0276118	-0.137685	-0.192246	-0.164965
60*		S	NWD1	284434		0.569708	0.645801	0.607754	-0.216272	-1.69536	-1.22734	-1.65234	-1.58183	-1.61708	0.0352554	-0.113359	-0.19307	-0.153214
61*		S	FREM2	341640		0.619026	0.596616	0.607821	-0.216224	-1.69502	-1.22718	-1.54389	-1.87727	-1.71058	0.166686	-0.299026	-0.432107	-0.365567
22*		S	PPARD	5467		0.673966	0.542016	0.607991	-0.216103	-1.69415	-1.22676	-1.54196	-1.9988	-1.77038	0.228424	-0.147039	-0.397736	-0.272387
60*		S	YIPF7	285525		0.616778	0.599581	0.608179	-0.215968	-1.69319	-1.2263	-1.61442	-1.61712	-1.61577	0.0013476	-0.0904088	-0.222631	-0.15652
33*		S	SHOC2	8036		0.599359	0.617079	0.608219	-0.21594	-1.69299	-1.22621	-1.8046	-1.78275	-1.79367	0.0109239	-0.357499	-0.185568	-0.271533
18*		S	DYNC1H1	1778		0.645719	0.570733	0.608226	-0.215935	-1.69296	-1.22619	-1.8531	-2.13778	-1.99544	0.142344	-0.183442	-0.365656	-0.274549
43*		S	C5orf22	55322		0.743362	0.473145	0.608254	-0.215915	-1.69282	-1.22612	-1.52846	-1.95068	-1.73957	0.211112	-0.0637052	-0.473108	-0.268406
38*		S	TRPC4AP	26133		0.528747	0.687846	0.608297	-0.215885	-1.6926	-1.22602	-1.94443	-1.58403	-1.76423	0.180197	-0.395819	-0.153018	-0.274418
61*		S	LOC340109	340109		0.5999	0.616788	0.608344	-0.215851	-1.69236	-1.2259	-1.55879	-1.85929	-1.70904	0.150252	-0.314447	-0.417208	-0.365827
41*		S	TXNDC10	54495		0.612002	0.604695	0.608348	-0.215848	-1.69233	-1.22589	-1.69939	-1.68476	-1.69207	0.00731437	-0.326777	-0.167127	-0.246952
20*		S	APOL2	23780		0.521628	0.695318	0.608473	-0.215759	-1.6917	-1.22559	-1.68702	-1.3471	-1.51706	0.16996	-0.210178	-0.0325071	-0.121343
38*		S	PYGO1	26108		0.555895	0.661857	0.608876	-0.215471	-1.68965	-1.2246	-1.92098	-1.60587	-1.76342	0.157553	-0.378705	-0.169748	-0.274226
58*		S	C11orf66	220004		0.667907	0.550288	0.609097	-0.215313	-1.68852	-1.22406	-1.54396	-1.92157	-1.73277	0.188802	-0.145171	-0.339505	-0.242338
53*		S	ZNF543	125919		0.688936	0.529277	0.609106	-0.215307	-1.68848	-1.22404	-1.56395	-1.9576	-1.76077	0.196823	-0.225766	-0.400345	-0.313056
15*		S	SDHC	6391		0.597828	0.620623	0.609225	-0.215222	-1.68787	-1.22375	-1.73864	-1.63795	-1.68829	0.0503427	-0.273922	-0.217715	-0.245818
22*		S	TNFRSF25	8718		0.67492	0.543681	0.609301	-0.215168	-1.68749	-1.22356	-1.54121	-1.99722	-1.76922	0.228004	-0.146436	-0.396652	-0.271544
9*		S	NPR3	4883		0.506402	0.712361	0.609382	-0.215111	-1.68708	-1.22336	-1.69371	-1.717	-1.70536	0.0116456	-0.262401	-0.271377	-0.266889
47*		S	DHX40	79665		0.588816	0.630341	0.609579	-0.21497	-1.68608	-1.22288	-1.75862	-1.48095	-1.61979	0.138833	-0.219563	-0.141583	-0.180573
18*		S	EIF2B3	8891		0.531146	0.688043	0.609595	-0.214959	-1.68599	-1.22284	-1.98884	-2.00861	-1.99873	0.00988789	-0.25361	-0.293348	-0.273479
65*		S	LOC340765	340765		0.634192	0.58504	0.609616	-0.214944	-1.68589	-1.22279	-1.6341	-1.63617	-1.63513	0.00103716	-0.325648	-0.128963	-0.227305
50*		S	SLC7A3	84889		0.653322	0.566866	0.610094	-0.214603	-1.68346	-1.22162	-1.44168	-1.76975	-1.60571	0.164037	-0.108289	-0.310473	-0.209381
69*		S	LOC387974	387974		0.676528	0.544169	0.610348	-0.214422	-1.68217	-1.221	-1.66828	-2.07144	-1.86986	0.201581	-0.309765	-0.482763	-0.396264
42*		S	C12orf48	55010		0.541447	0.679277	0.610362	-0.214413	-1.6821	-1.22097	-1.61563	-1.55574	-1.58568	0.0299467	-0.180463	-0.212839	-0.196651
61*		S	ENPP7	339221		0.602483	0.618659	0.610571	-0.214264	-1.68104	-1.22046	-1.55678	-1.85762	-1.7072	0.150424	-0.312364	-0.415826	-0.364095
69*		S	LOC387943	387943		0.469783	0.751442	0.610613	-0.214234	-1.68083	-1.22035	-1.83581	-1.88587	-1.86084	0.0250294	-0.458369	-0.348622	-0.403495
18*		S	RAB3B	5865		0.71318	0.508275	0.610727	-0.214153	-1.68024	-1.22007	-1.77317	-2.20656	-1.98986	0.216692	-0.142126	-0.404154	-0.27314
46*		S	SLC30A5	64924		0.550101	0.671653	0.610877	-0.214046	-1.67948	-1.21971	-1.62316	-1.5416	-1.58238	0.0407829	-0.14517	-0.178575	-0.161872
17*		S	TUBA4A	7277		0.627888	0.594729	0.611309	-0.21374	-1.6773	-1.21865	-1.83833	-1.72343	-1.78088	0.0574497	-0.379977	-0.27084	-0.325409
10*		S	ATF6B	1388		0.527349	0.695692	0.611521	-0.213589	-1.67622	-1.21813	-1.70491	-1.74798	-1.72644	0.0215379	-0.258872	-0.298069	-0.278471
8*		S	GHSR	2693		0.603468	0.619821	0.611645	-0.213501	-1.6756	-1.21783	-1.62157	-1.67626	-1.64891	0.0273443	-0.216896	-0.261057	-0.238976
22*		S	GRIN1	2902		0.550367	0.673027	0.611697	-0.213464	-1.67533	-1.2177	-1.63824	-1.87425	-1.75625	0.118009	-0.225195	-0.312452	-0.268824
27*		S	IFI44	10561		0.617241	0.606256	0.611749	-0.213427	-1.67507	-1.21758	-1.5536	-1.75459	-1.65409	0.100498	-0.127656	-0.231789	-0.179723
16*		S	FKBP14	55033		0.561564	0.662088	0.611826	-0.213372	-1.67468	-1.21739	-1.95899	-1.552	-1.7555	0.203494	-0.466175	-0.210405	-0.33829
70*		S	LOC388348	388348		0.625412	0.598712	0.612062	-0.213205	-1.67348	-1.21681	-1.54036	-1.69521	-1.61778	0.0774227	-0.115094	-0.284379	-0.199736
69*		S	LOC400201	400201		0.763734	0.460676	0.612205	-0.213103	-1.67276	-1.21646	-1.59762	-2.1462	-1.87191	0.274289	-0.247083	-0.536797	-0.39194
28*		S	SH3PXD2A	9644		0.618089	0.606472	0.612281	-0.21305	-1.67238	-1.21628	-1.55853	-1.67554	-1.61703	0.0585019	-0.208766	-0.203306	-0.206036
18*		S	RHOC	389		0.685386	0.539701	0.612544	-0.212863	-1.67105	-1.21563	-1.8061	-2.17195	-1.98903	0.182926	-0.159148	-0.384783	-0.271966
22*		S	SCYE1	9255		0.625451	0.599814	0.612633	-0.2128	-1.6706	-1.21542	-1.57975	-1.94386	-1.7618	0.182054	-0.177717	-0.360111	-0.268914
40*		S	GPN3	51184		0.596888	0.628542	0.612715	-0.212741	-1.67018	-1.21521	-1.56495	-1.7643	-1.66463	0.0996754	-0.227583	-0.29343	-0.260507
63*		S	OR2T29	343563		0.629655	0.596167	0.612911	-0.212603	-1.66919	-1.21474	-1.72327	-1.84085	-1.78206	0.0587941	-0.283991	-0.358368	-0.321179
54*		S	TBC1D20	128637		0.66455	0.561472	0.613011	-0.212532	-1.66868	-1.21449	-1.55513	-1.63247	-1.5938	0.0386711	-0.13369	-0.258707	-0.196199
49*		S	MYCBPAP	84073		0.513926	0.712217	0.613071	-0.212489	-1.66838	-1.21434	-1.77624	-1.47268	-1.62446	0.15178	-0.21369	-0.165399	-0.189544
51*		S	RSPH1	89765		0.708328	0.517985	0.613156	-0.212429	-1.66795	-1.21414	-1.64804	-2.12081	-1.88442	0.236388	-0.16008	-0.474594	-0.317337
8*		S	GPR2	2826		0.664559	0.5621	0.613329	-0.212306	-1.66707	-1.21371	-1.56917	-1.72807	-1.64862	0.07945	-0.173675	-0.297482	-0.235579
17*		S	CYP1B1	1545		0.638454	0.588289	0.613371	-0.212276	-1.66686	-1.21361	-1.82882	-1.7285	-1.77866	0.0501605	-0.372349	-0.274816	-0.323583
23*		S	GJC1	10052		0.566624	0.660266	0.613445	-0.212224	-1.66649	-1.21343	-1.38997	-1.64723	-1.5186	0.128631	-0.130392	-0.301857	-0.216125
32*		S	SOLH	6650		0.67567	0.55143	0.61355	-0.21215	-1.66596	-1.21317	-1.65892	-1.87621	-1.76757	0.108645	-0.272196	-0.362628	-0.317412
39*		S	NOX1	27035		0.702208	0.524955	0.613582	-0.212128	-1.6658	-1.2131	-1.87109	-1.73068	-1.80088	0.0702055	-0.315904	-0.379408	-0.347656
59*		S	RCOR2	283248		0.670596	0.556637	0.613617	-0.212103	-1.66562	-1.21301	-1.49714	-1.78468	-1.64091	0.143766	-0.181763	-0.366263	-0.274013
55*		S	SLFN13	146857		0.659194	0.568305	0.613749	-0.212009	-1.66495	-1.21269	-1.7694	-1.66316	-1.71628	0.0531229	-0.24939	-0.171514	-0.210452
32*		S	RPS8	6202		0.55676	0.671035	0.613897	-0.211904	-1.66421	-1.21232	-1.75385	-1.77672	-1.76529	0.0114336	-0.353864	-0.288243	-0.321054
35*		S	BTN3A3	10384		0.685788	0.542031	0.613909	-0.211896	-1.66415	-1.21229	-1.55509	-1.87821	-1.71665	0.161562	-0.130877	-0.58357	-0.357223
61*		S	TGM6	343641		0.559085	0.669219	0.614152	-0.211724	-1.66292	-1.2117	-1.59057	-1.81257	-1.70157	0.111002	-0.347354	-0.378484	-0.362919
60*		S	BCORL2	286554		0.68895	0.539442	0.614196	-0.211693	-1.6627	-1.21159	-1.5563	-1.66304	-1.60967	0.0533739	-0.0552202	-0.261095	-0.158158
59*		S	GLT8D3	283464		0.523693	0.704729	0.614211	-0.211682	-1.66263	-1.21156	-1.61512	-1.66491	-1.64002	0.0248921	-0.29425	-0.267893	-0.281071
62*		S	TMEM189	387521		0.526874	0.701724	0.614299	-0.21162	-1.66218	-1.21134	-1.62329	-1.60729	-1.61529	0.00800118	-0.275785	-0.262738	-0.269262
16*		S	EYA3	2140		0.583917	0.644718	0.614317	-0.211607	-1.66209	-1.2113	-1.93945	-1.56563	-1.75254	0.186908	-0.450652	-0.222835	-0.336743
46*		S	C1orf116	79098		0.500753	0.7279	0.614326	-0.211601	-1.66204	-1.21128	-1.66085	-1.498	-1.57942	0.0814233	-0.171633	-0.140574	-0.156103
36*		S	USP39	10713		0.667557	0.561352	0.614455	-0.21151	-1.6614	-1.21096	-1.6655	-1.79914	-1.73232	0.0668181	-0.194279	-0.224286	-0.209283
56*		S	AMZ1	155185		0.704417	0.524493	0.614455	-0.21151	-1.6614	-1.21096	-1.54725	-1.62197	-1.58461	0.0373603	-0.183325	-0.155577	-0.169451
71*		S	FLJ41423	399886		0.581261	0.648389	0.614825	-0.211248	-1.65953	-1.21006	-1.68174	-1.52875	-1.60525	0.0764952	-0.365843	-0.137906	-0.251874
67*		S	ZNF815	401303		0.688063	0.541922	0.614993	-0.21113	-1.65869	-1.20965	-1.59804	-1.98759	-1.79282	0.194773	-0.108372	-0.446694	-0.277533
65*		S	DNAH8	1769		0.635949	0.594056	0.615003	-0.211123	-1.65864	-1.20962	-1.63261	-1.62862	-1.63061	0.00199643	-0.324201	-0.12405	-0.224125
13*		S	LDB1	8861		0.634595	0.595897	0.615246	-0.210951	-1.65741	-1.20903	-1.7858	-1.70641	-1.7461	0.0396976	-0.303973	-0.308294	-0.306133
58*		S	TMEM130	222865		0.593237	0.637433	0.615335	-0.210888	-1.65696	-1.20881	-1.60943	-1.84808	-1.72876	0.119323	-0.198248	-0.289216	-0.243732
16*		S	TM4SF4	7104		0.556046	0.674794	0.61542	-0.210828	-1.65653	-1.2086	-1.96381	-1.54203	-1.75292	0.21089	-0.470007	-0.201313	-0.33566
62*		S	LOC389203	389203		0.718801	0.512443	0.615622	-0.210686	-1.65552	-1.20811	-1.46641	-1.74735	-1.60688	0.140473	-0.132496	-0.391158	-0.261827
29*		S	ATP12A	0		0.60966	0.621716	0.615688	-0.210639	-1.65519	-1.20795	-1.5621	-1.77447	-1.66828	0.106185	-0.104395	-0.387697	-0.246046
8*		S	GPR48	55366		0.659957	0.571508	0.615733	-0.210608	-1.65496	-1.20784	-1.57312	-1.71963	-1.64637	0.0732539	-0.176931	-0.291545	-0.234238
34*		S	APLN	8862		0.684147	0.547822	0.615985	-0.21043	-1.65369	-1.20722	-1.83578	-1.6814	-1.75859	0.0771907	-0.311279	-0.218945	-0.265112
27*		S	IFIT1	3434		0.703088	0.529061	0.616074	-0.210367	-1.65324	-1.207	-1.48413	-1.83454	-1.65933	0.175206	-0.074616	-0.287159	-0.180888
18*		S	GTF2F1	2962		0.713952	0.51822	0.616086	-0.210359	-1.65318	-1.20697	-1.77226	-2.19561	-1.98393	0.211674	-0.141653	-0.398024	-0.269839
17*		S	TUBB6	84617		0.670254	0.562026	0.61614	-0.210321	-1.65291	-1.20684	-1.80023	-1.74921	-1.77472	0.02551	-0.349391	-0.291031	-0.320211
58*		S	ZNF438	220929		0.522469	0.709818	0.616143	-0.210318	-1.65289	-1.20683	-1.67148	-1.78704	-1.72926	0.0577788	-0.248552	-0.247444	-0.247998
59*		S	TCERG1L	256536		0.62314	0.609374	0.616257	-0.210238	-1.65232	-1.20656	-1.53526	-1.74203	-1.63864	0.103384	-0.218101	-0.331233	-0.274667
56*		S	LOC152024	152024		0.594341	0.638786	0.616564	-0.210022	-1.65078	-1.20581	-1.63683	-1.53065	-1.58374	0.0530863	-0.26155	-0.0919722	-0.176761
21*		S	KLRC4	8302		0.533025	0.700274	0.616649	-0.209962	-1.65035	-1.2056	-1.694	-1.54876	-1.62138	0.07262	-0.304201	-0.120306	-0.212253
54*		S	GLT1D1	144423		0.712424	0.520896	0.61666	-0.209954	-1.6503	-1.20557	-1.51578	-1.66195	-1.58887	0.0730852	-0.103302	-0.284482	-0.193892
27*		S	PTBP1	5725		0.570321	0.663455	0.616888	-0.209794	-1.64915	-1.20501	-1.59156	-1.69535	-1.64346	0.0518941	-0.156645	-0.190762	-0.173703
31*		S	AGTPBP1	23287		0.607831	0.626509	0.61717	-0.209595	-1.64774	-1.20432	-1.97982	-1.54477	-1.76229	0.217523	-0.352856	-0.177504	-0.26518
22*		S	ARHGAP4	393		0.69089	0.543696	0.617293	-0.209509	-1.64712	-1.20402	-1.52877	-1.99721	-1.76299	0.234217	-0.136337	-0.396642	-0.26649
40*		S	2024-03-02	51257		0.716378	0.518233	0.617305	-0.2095	-1.64706	-1.20399	-1.47094	-1.86021	-1.66557	0.194638	-0.142009	-0.366487	-0.254248
26*		S	IMPDH1	3614		0.541872	0.693068	0.61747	-0.209384	-1.64623	-1.20359	-1.7576	-1.82865	-1.79312	0.0355215	-0.250504	-0.31625	-0.283377
67*		S	hCG_1651889	401399		0.565349	0.669635	0.617492	-0.209369	-1.64612	-1.20354	-1.69278	-1.86965	-1.78122	0.0884352	-0.17066	-0.358985	-0.264823
33*		S	NDST2	8509		0.604882	0.630634	0.617758	-0.209182	-1.64479	-1.20289	-1.7998	-1.77079	-1.7853	0.0145057	-0.353616	-0.178467	-0.266041
70*		S	FLJ44087	400649		0.681241	0.554411	0.617826	-0.209134	-1.64445	-1.20272	-1.49933	-1.73325	-1.61629	0.116959	-0.0840297	-0.315987	-0.200008
31*		S	MYO1D	4642		0.655721	0.580298	0.618009	-0.209005	-1.64353	-1.20227	-1.93512	-1.57834	-1.75673	0.178386	-0.323651	-0.206591	-0.265121
27*		S	POLR3D	661		0.685888	0.550759	0.618324	-0.208784	-1.64195	-1.2015	-1.49804	-1.81207	-1.65506	0.157011	-0.0852428	-0.271596	-0.178419
33*		S	DPM2	8818		0.585129	0.651936	0.618533	-0.208637	-1.64091	-1.20099	-1.81694	-1.75201	-1.78447	0.0324673	-0.367502	-0.167307	-0.267405
56*		S	LOC150759	150759		0.571452	0.665808	0.61863	-0.208569	-1.64042	-1.20075	-1.65545	-1.50906	-1.58226	0.0731945	-0.277815	-0.0769342	-0.177375
46*		S	C17orf39	79018		0.559529	0.677824	0.618676	-0.208536	-1.64019	-1.20064	-1.61596	-1.53681	-1.57639	0.0395747	-0.140114	-0.174406	-0.15726
34*		S	CHST3	9469		0.61699	0.620526	0.618758	-0.208479	-1.63978	-1.20044	-1.89207	-1.62427	-1.75817	0.133898	-0.352012	-0.176449	-0.264231
41*		S	RBM35A	54845		0.550533	0.687248	0.618891	-0.208386	-1.63912	-1.20012	-1.74955	-1.61695	-1.68325	0.0663002	-0.371099	-0.121911	-0.246505
61*		S	LOC348262	348262		0.722847	0.515492	0.61917	-0.20819	-1.63772	-1.19944	-1.46305	-1.94955	-1.7063	0.243251	-0.21532	-0.492024	-0.353672
30*		S	GPX4	2879		0.634889	0.603543	0.619216	-0.208158	-1.63749	-1.19932	-1.72801	-1.71688	-1.72245	0.00556372	-0.345316	-0.19001	-0.267663
58*		S	LRRC43	254050		0.592111	0.646892	0.619502	-0.207958	-1.63606	-1.19862	-1.61042	-1.84011	-1.72526	0.114842	-0.199049	-0.283757	-0.241403
63*		S	LOC221140	221140		0.608607	0.630603	0.619605	-0.207885	-1.63554	-1.19837	-1.74218	-1.81313	-1.77765	0.0354758	-0.299098	-0.336807	-0.317952
29*		S	CSPG3	1879		0.636574	0.602762	0.619668	-0.207841	-1.63523	-1.19822	-1.54132	-1.79216	-1.66674	0.125421	-0.0898182	-0.403114	-0.246466
32*		S	PSMA6	5687		0.54821	0.691375	0.619792	-0.207754	-1.6346	-1.19791	-1.76068	-1.7598	-1.76024	0.000439148	-0.359736	-0.275594	-0.317665
56*		S	TTLL11	158135		0.523509	0.716171	0.61984	-0.20772	-1.63437	-1.1978	-1.69446	-1.46882	-1.58164	0.112821	-0.311886	-0.0489069	-0.180396
30*		S	GRID1	2894		0.643213	0.59648	0.619846	-0.207716	-1.63433	-1.19778	-1.72093	-1.72289	-1.72191	0.000979725	-0.33915	-0.194012	-0.266581
10*		S	ABCG5	64240		0.459868	0.780327	0.620097	-0.20754	-1.63308	-1.19717	-1.75698	-1.66921	-1.7131	0.0438884	-0.299818	-0.235568	-0.267693
41*		S	PCF11	51585		0.69858	0.54174	0.62016	-0.207496	-1.63277	-1.19701	-1.62873	-1.73647	-1.6826	0.0538681	-0.26435	-0.201609	-0.232979
8*		S	EDG1	1901		0.66112	0.579215	0.620167	-0.207491	-1.63273	-1.197	-1.57212	-1.71271	-1.64241	0.0702937	-0.176108	-0.286682	-0.231395
15*		S	TGS1	96764		0.582751	0.657641	0.620196	-0.207471	-1.63259	-1.19693	-1.75252	-1.6094	-1.68096	0.0715567	-0.284613	-0.194739	-0.239676
52*		S	C13orf27	93081		0.673999	0.56674	0.62037	-0.20735	-1.63172	-1.1965	-1.53355	-1.67309	-1.60332	0.069768	-0.164555	-0.167074	-0.165814
37*		S	TTC28	23331		0.587062	0.653738	0.6204	-0.207328	-1.63157	-1.19643	-1.61148	-1.70443	-1.65795	0.0464763	-0.27598	-0.240507	-0.258243
32*		S	RPE	6120		0.667569	0.573245	0.620407	-0.207323	-1.63154	-1.19641	-1.66539	-1.85806	-1.76173	0.0963383	-0.27776	-0.349061	-0.31341
16*		S	NR2C2AP	126382		0.551608	0.689342	0.620475	-0.207276	-1.6312	-1.19624	-1.96769	-1.53062	-1.74916	0.218538	-0.473089	-0.190903	-0.331996
21*		S	IFNA8	3445		0.54394	0.697485	0.620713	-0.20711	-1.63001	-1.19566	-1.68504	-1.55104	-1.61804	0.0670016	-0.296466	-0.122009	-0.209237
44*		S	TMEM27	57393		0.703214	0.538928	0.621071	-0.206859	-1.62822	-1.19479	-1.9963	-1.80649	-1.9014	0.0949065	-0.466995	-0.271249	-0.369122
36*		S	SUGT1	10910		0.572515	0.669687	0.621101	-0.206838	-1.62807	-1.19471	-1.74278	-1.70754	-1.72516	0.0176208	-0.250989	-0.166276	-0.208633
67*		S	LOC392152	392152		0.736308	0.506314	0.621311	-0.206691	-1.62703	-1.1942	-1.5608	-2.02047	-1.79063	0.229837	-0.0838836	-0.471148	-0.277516
51*		S	CCDC65	85478		0.646032	0.597091	0.621561	-0.206516	-1.62578	-1.19359	-1.70802	-2.03833	-1.87317	0.165154	-0.20195	-0.419122	-0.310536
52*		S	C1orf156	92342		0.728305	0.514824	0.621564	-0.206514	-1.62576	-1.19358	-1.49223	-1.71216	-1.60219	0.109964	-0.12952	-0.193656	-0.161588
57*		S	FAM46D	169966		0.638837	0.604434	0.621636	-0.206464	-1.62541	-1.19341	-1.99167	-1.5798	-1.78574	0.205936	-0.421323	-0.242283	-0.331803
47*		S	AGBL2	79841		0.821344	0.422255	0.621799	-0.20635	-1.62459	-1.19301	-1.56415	-1.63272	-1.59843	0.034288	-0.0911987	-0.275572	-0.183385
42*		S	ADI1	55256		0.684115	0.559842	0.621978	-0.206225	-1.6237	-1.19257	-1.51326	-1.65671	-1.58498	0.0717222	-0.101377	-0.304582	-0.202979
69*		S	LOC400043	400043		0.81397	0.430357	0.622163	-0.206095	-1.62278	-1.19212	-1.55691	-2.17334	-1.86513	0.308215	-0.210974	-0.556419	-0.383696
69*		S	LOC387908	387908		0.55251	0.692153	0.622332	-0.205978	-1.62194	-1.19171	-1.76877	-1.93895	-1.85386	0.0850879	-0.398906	-0.386992	-0.392949
27*		S	HPRT1	3251		0.688199	0.556666	0.622433	-0.205908	-1.62144	-1.19146	-1.49617	-1.80595	-1.65106	0.154887	-0.083815	-0.267359	-0.175587
55*		S	DNAH2	146754		0.708516	0.536354	0.622435	-0.205906	-1.62143	-1.19145	-1.72736	-1.69186	-1.70961	0.0177511	-0.219878	-0.19132	-0.205599
65*		S	LOC400749	400749		0.712354	0.533053	0.622703	-0.205719	-1.62009	-1.1908	-1.56798	-1.67972	-1.62385	0.0558735	-0.261279	-0.157291	-0.209285
22*		S	TNFRSF4	7293		0.697912	0.54756	0.622736	-0.205696	-1.61993	-1.19072	-1.5233	-1.99353	-1.75842	0.235115	-0.131897	-0.394127	-0.263012
52*		S	ZNF276	92822		0.716168	0.529951	0.623059	-0.20547	-1.61832	-1.18993	-1.50146	-1.70077	-1.60112	0.0996542	-0.13735	-0.185911	-0.16163
39*		S	MRPL46	26589		0.703718	0.542528	0.623123	-0.205426	-1.618	-1.18977	-1.86967	-1.71661	-1.79314	0.076532	-0.314915	-0.366454	-0.340684
43*		S	ERBB2IP	55914		0.635888	0.610441	0.623165	-0.205397	-1.6178	-1.18967	-1.61685	-1.83602	-1.72643	0.109583	-0.122828	-0.38056	-0.251694
32*		S	RPL4	6124		0.6227	0.62429	0.623495	-0.205167	-1.61616	-1.18886	-1.70121	-1.8156	-1.75841	0.0571972	-0.308576	-0.317315	-0.312945
35*		S	ZBTB5	9925		0.656321	0.59079	0.623556	-0.205125	-1.61586	-1.18871	-1.57757	-1.83237	-1.70497	0.127398	-0.148111	-0.538176	-0.343144
44*		S	RHBG	57127		0.607905	0.639671	0.623788	-0.204963	-1.6147	-1.18814	-2.09765	-1.72552	-1.91158	0.186062	-0.544489	-0.214838	-0.379663
25*		S	COL8A1	1295		0.581855	0.666074	0.623965	-0.20484	-1.61382	-1.18771	-1.83508	-1.62397	-1.72952	0.105555	-0.40155	-0.273599	-0.337575
59*		S	CCDC96	257236		0.654411	0.593574	0.623992	-0.204821	-1.61369	-1.18764	-1.51014	-1.7548	-1.63247	0.12233	-0.194156	-0.341728	-0.267942
71*		S	OR6C70	390327		0.59123	0.656789	0.624009	-0.204809	-1.6136	-1.1876	-1.67245	-1.52186	-1.59716	0.0752951	-0.356906	-0.132262	-0.244584
17*		S	MCM7	4176		0.654156	0.593872	0.624014	-0.204806	-1.61358	-1.18759	-1.81471	-1.7241	-1.7694	0.0453023	-0.361013	-0.271369	-0.316191
67*		S	LOC389562	389562		0.816509	0.43154	0.624024	-0.204798	-1.61353	-1.18757	-1.49888	-2.08952	-1.7942	0.295321	-0.0431745	-0.5225	-0.282837
64*		S	LOC147710	147710		0.577775	0.671086	0.62443	-0.204516	-1.61151	-1.18657	-1.91038	-1.58771	-1.74904	0.161336	-0.363184	-0.134196	-0.24869
12*		S	SERPINF2	5345		0.5456	0.703938	0.624769	-0.204281	-1.60983	-1.18575	-1.72628	-1.44851	-1.58739	0.138887	-0.54118	-0.0368278	-0.289004
58*		S	TMEM217	221468		0.527124	0.722532	0.624828	-0.20424	-1.60954	-1.1856	-1.6674	-1.77632	-1.72186	0.054459	-0.245243	-0.240107	-0.242675
46*		S	VKORC1	79001		0.620548	0.62913	0.624839	-0.204232	-1.60949	-1.18557	-1.56937	-1.57456	-1.57196	0.00259462	-0.107392	-0.207304	-0.157348
33*		S	JARID1D	8284		0.669217	0.580522	0.624869	-0.204211	-1.60934	-1.1855	-1.74399	-1.81499	-1.77949	0.0354977	-0.30839	-0.204718	-0.256554
64*		S	LOC200292	200292		0.669508	0.580483	0.624996	-0.204123	-1.60871	-1.18519	-1.81985	-1.65502	-1.73743	0.082415	-0.297952	-0.183211	-0.240582
71*		S	OR10G3	26533		0.612709	0.637681	0.625195	-0.203985	-1.60772	-1.1847	-1.65244	-1.53753	-1.59499	0.0574562	-0.337649	-0.1451	-0.241375
26*		S	FLJ20184	54848		0.576067	0.674485	0.625276	-0.203928	-1.60732	-1.18451	-1.72706	-1.84449	-1.78577	0.0587148	-0.228572	-0.327924	-0.278248
68*		S	C10orf120	399814		0.629507	0.621631	0.625569	-0.203725	-1.60587	-1.18379	-1.44113	-1.67856	-1.55984	0.118713	-0.150036	-0.171521	-0.160778
59*		S	CLEC9A	283420		0.583969	0.66826	0.626115	-0.203346	-1.60317	-1.18246	-1.56672	-1.6944	-1.63056	0.0638433	-0.248095	-0.292117	-0.270106
18*		S	CFLAR	8837		0.667553	0.585047	0.6263	-0.203218	-1.60225	-1.182	-1.82723	-2.12202	-1.97463	0.147397	-0.17007	-0.356833	-0.263451
48*		S	COL21A1	81578		0.686207	0.566601	0.626404	-0.203145	-1.60174	-1.18175	-1.61494	-1.87696	-1.74595	0.131009	-0.224281	-0.541885	-0.383083
54*		S	ZFAND2B	130617		0.700471	0.552626	0.626548	-0.203045	-1.60102	-1.1814	-1.52561	-1.6389	-1.58225	0.0566462	-0.110889	-0.264327	-0.187608
48*		S	DDHD1	80821		0.657996	0.595797	0.626896	-0.202804	-1.5993	-1.18054	-1.63895	-1.85212	-1.74554	0.106581	-0.244552	-0.518254	-0.381403
18*		S	HDAC2	3066		0.568459	0.685368	0.626914	-0.202792	-1.59922	-1.1805	-1.94463	-2.01156	-1.9781	0.0334641	-0.230758	-0.294997	-0.262878
22*		S	TNFSF10	8743		0.659442	0.594526	0.626984	-0.202744	-1.59887	-1.18033	-1.55327	-1.94888	-1.75108	0.197807	-0.156223	-0.363554	-0.259888
68*		S	LOC392730	392730		0.696831	0.557227	0.627029	-0.202712	-1.59865	-1.18022	-1.39448	-1.73312	-1.5638	0.169319	-0.103734	-0.20861	-0.156172
61*		S	LOC345667	345667		0.588208	0.666363	0.627286	-0.202535	-1.59738	-1.17959	-1.56789	-1.81512	-1.69151	0.123613	-0.323873	-0.380593	-0.352233
17*		S	MBTPS2	51360		0.620952	0.633877	0.627414	-0.202445	-1.59675	-1.17928	-1.84456	-1.69256	-1.76856	0.0760018	-0.384985	-0.24667	-0.315827
50*		S	LYZL1	84569		0.706703	0.548408	0.627556	-0.202348	-1.59605	-1.17893	-1.39967	-1.78586	-1.59277	0.193094	-0.0706305	-0.323152	-0.196891
58*		S	LEMD2	221496		0.718083	0.537155	0.627619	-0.202304	-1.59574	-1.17878	-1.49997	-1.93264	-1.7163	0.216337	-0.109504	-0.347084	-0.228294
68*		S	LOC389628	389628		0.702118	0.553453	0.627785	-0.202189	-1.59491	-1.17837	-1.39082	-1.73632	-1.56357	0.17275	-0.100098	-0.210783	-0.15544
37*		S	SR140	23350		0.667344	0.588342	0.627843	-0.202149	-1.59463	-1.17823	-1.54464	-1.75446	-1.64955	0.104908	-0.214145	-0.278524	-0.246334
60*		S	FRG1B	284802		0.676096	0.57963	0.627863	-0.202135	-1.59453	-1.17818	-1.56665	-1.63236	-1.5995	0.0328532	-0.0614874	-0.235392	-0.14844
56*		S	WDSUB1	151525		0.718864	0.537053	0.627958	-0.202069	-1.59406	-1.17795	-1.5355	-1.61194	-1.57372	0.0382205	-0.173058	-0.148587	-0.160823
50*		S	SLC12A8	84561		0.594783	0.661314	0.628049	-0.202007	-1.59362	-1.17773	-1.48774	-1.68732	-1.58753	0.0997932	-0.149587	-0.245593	-0.19759
15*		S	HYAL1	3373		0.711837	0.544282	0.628059	-0.201999	-1.59356	-1.1777	-1.63369	-1.69683	-1.66526	0.0315685	-0.193077	-0.265097	-0.229087
38*		S	GIGYF2	26058		0.727653	0.528608	0.628131	-0.20195	-1.59321	-1.17753	-1.7726	-1.71783	-1.74522	0.0273842	-0.270427	-0.255524	-0.262975
57*		S	FLJ30092	196515		0.597819	0.65906	0.62844	-0.201737	-1.59169	-1.17677	-2.02941	-1.53765	-1.78353	0.245883	-0.447799	-0.203352	-0.325575
29*		S	DLAT	1650		0.735777	0.52121	0.628494	-0.201699	-1.59142	-1.17664	-1.46472	-1.86827	-1.66649	0.201777	-0.036089	-0.469447	-0.252768
71*		S	OR4A5	81318		0.637198	0.619802	0.6285	-0.201695	-1.59139	-1.17662	-1.62963	-1.55219	-1.59091	0.0387191	-0.315695	-0.157113	-0.236404
54*		S	C20orf165	128497		0.667041	0.59006	0.628551	-0.20166	-1.59114	-1.1765	-1.55308	-1.6117	-1.58239	0.0293091	-0.132109	-0.240548	-0.186329
23*		S	SLC14A1	6563		0.571743	0.685424	0.628583	-0.201637	-1.59098	-1.17642	-1.38625	-1.62583	-1.50604	0.119791	-0.126421	-0.282233	-0.204327
68*		S	LOC399715	399715		0.74149	0.515747	0.628618	-0.201613	-1.59081	-1.17634	-1.36353	-1.76826	-1.5659	0.202363	-0.0730195	-0.232498	-0.152759
31*		S	ACCN5	51802		0.646496	0.610825	0.62866	-0.201584	-1.5906	-1.17623	-1.94373	-1.55616	-1.74995	0.193781	-0.329277	-0.187376	-0.258326
65*		S	LOC388628	388628		0.604341	0.653223	0.628782	-0.2015	-1.59	-1.17594	-1.65935	-1.57905	-1.6192	0.04015	-0.350231	-0.0918084	-0.22102
50*		S	RAX2	84839		0.542982	0.71508	0.629031	-0.201328	-1.58877	-1.17533	-1.5285	-1.6404	-1.58445	0.0559518	-0.186131	-0.208659	-0.197395
8*		S	AGTR2	186		0.577777	0.680297	0.629037	-0.201324	-1.58875	-1.17531	-1.64361	-1.62197	-1.63279	0.0108161	-0.235072	-0.222893	-0.228982
31*		S	ACBD3	64746		0.731164	0.527508	0.629336	-0.201117	-1.58727	-1.17458	-1.8647	-1.6167	-1.7407	0.123999	-0.277644	-0.239819	-0.258731
16*		S	ACOT7	11332		0.519033	0.740186	0.62961	-0.200929	-1.58593	-1.17391	-1.99617	-1.49072	-1.74345	0.252724	-0.495712	-0.15452	-0.325116
33*		S	HIST1H2BC	8347		0.688612	0.570839	0.629726	-0.200849	-1.58536	-1.17363	-1.72717	-1.82353	-1.77535	0.0481802	-0.294755	-0.209791	-0.252273
51*		S	SMYD4	114826		0.669048	0.590688	0.629868	-0.20075	-1.58466	-1.17328	-1.68586	-2.045	-1.86543	0.179573	-0.186481	-0.423612	-0.305046
33*		S	RAE1	8480		0.703207	0.556663	0.629935	-0.200704	-1.58433	-1.17312	-1.71451	-1.83603	-1.77527	0.0607621	-0.284495	-0.217217	-0.250856
40*		S	ANKRD39	51239		0.565136	0.694793	0.629965	-0.200684	-1.58418	-1.17304	-1.58993	-1.7067	-1.64832	0.0583828	-0.250323	-0.249552	-0.249938
17*		S	MCM2	4171		0.617652	0.642939	0.630296	-0.200456	-1.58255	-1.17224	-1.84753	-1.68541	-1.76647	0.081058	-0.387367	-0.241074	-0.314221
69*		S	LOC400320	400320		0.588298	0.672337	0.630317	-0.200441	-1.58245	-1.17218	-1.73977	-1.95669	-1.84823	0.108458	-0.373183	-0.399816	-0.3865
36*		S	ME3	10873		0.676977	0.583914	0.630445	-0.200352	-1.58182	-1.17187	-1.65785	-1.78006	-1.71895	0.0611086	-0.188658	-0.212205	-0.200432
25*		S	C4B	721		0.655151	0.605856	0.630503	-0.200312	-1.58153	-1.17173	-1.77186	-1.67432	-1.72309	0.0487687	-0.349005	-0.318787	-0.333896
63*		S	NBPF7	343505		0.630839	0.630695	0.630767	-0.200131	-1.58024	-1.17108	-1.7222	-1.81306	-1.76763	0.0454266	-0.283141	-0.33675	-0.309945
18*		S	PPP2R2C	5522		0.702432	0.559109	0.630771	-0.200129	-1.58022	-1.17107	-1.78591	-2.15058	-1.96824	0.182339	-0.148709	-0.372821	-0.260765
22*		S	GABRB2	2561		0.661972	0.599593	0.630783	-0.20012	-1.58016	-1.17104	-1.5513	-1.94407	-1.74768	0.196383	-0.154623	-0.360255	-0.257439
37*		S	DULLARD	23399		0.549098	0.712899	0.630999	-0.199972	-1.5791	-1.17052	-1.64308	-1.65917	-1.65113	0.00804448	-0.30522	-0.206114	-0.255667
21*		S	MDK	4192		0.597649	0.664601	0.631125	-0.199885	-1.57848	-1.17021	-1.64097	-1.57792	-1.60944	0.0315257	-0.258407	-0.142086	-0.200247
68*		S	RAB19	401409		0.688597	0.573679	0.631138	-0.199876	-1.57842	-1.17018	-1.40019	-1.71918	-1.55968	0.159498	-0.109397	-0.199135	-0.154266
43*		S	PRPF40A	55660		0.571478	0.690984	0.631231	-0.199812	-1.57796	-1.16995	-1.66982	-1.76875	-1.71928	0.0494632	-0.158261	-0.326268	-0.242265
60*		S	MGC70863	284942		0.729434	0.53354	0.631487	-0.199636	-1.5767	-1.16932	-1.52369	-1.66755	-1.59562	0.0719307	-0.0354816	-0.26487	-0.150176
18*		S	MGST2	4258		0.619936	0.643259	0.631598	-0.19956	-1.57616	-1.16905	-1.88364	-2.05793	-1.97078	0.0871411	-0.199232	-0.320952	-0.260092
53*		S	TMIGD2	126259		0.64886	0.614611	0.631736	-0.199465	-1.57549	-1.16871	-1.59716	-1.88334	-1.74025	0.143092	-0.256368	-0.347265	-0.301817
32*		S	STRN	6801		0.600376	0.663875	0.632126	-0.199197	-1.57357	-1.16776	-1.71903	-1.78268	-1.75085	0.0318219	-0.323908	-0.292696	-0.308302
54*		S	HDX	139324		0.644211	0.620292	0.632251	-0.19911	-1.57296	-1.16745	-1.57185	-1.58973	-1.58079	0.00894447	-0.146601	-0.221344	-0.183973
39*		S	YARS2	51067		0.586073	0.678515	0.632294	-0.199081	-1.57275	-1.16735	-1.98021	-1.60771	-1.79396	0.186248	-0.392002	-0.26621	-0.329106
11*		S	SFRS8	6433		0.474503	0.790102	0.632302	-0.199075	-1.57271	-1.16733	-1.70596	-1.62363	-1.6648	0.0411661	-0.263048	-0.2253	-0.244174
38*		S	IFFO1	25900		0.622821	0.641792	0.632306	-0.199072	-1.57269	-1.16732	-1.86316	-1.62273	-1.74294	0.120216	-0.336514	-0.182664	-0.259589
59*		S	C11orf44	283171		0.710989	0.553956	0.632472	-0.198958	-1.57187	-1.16691	-1.4647	-1.78684	-1.62577	0.16107	-0.150833	-0.368044	-0.259438
68*		S	LOC402326	402326		0.637167	0.627982	0.632575	-0.198888	-1.57137	-1.16666	-1.43582	-1.67318	-1.5545	0.118676	-0.144768	-0.167863	-0.156316
56*		S	HSD17B7P2	158160		0.671279	0.594001	0.63264	-0.198843	-1.57105	-1.1665	-1.57422	-1.56644	-1.57033	0.00389123	-0.206874	-0.116895	-0.161885
22*		S	ARNT2	9915		0.567395	0.697942	0.632668	-0.198824	-1.57091	-1.16643	-1.62497	-1.85057	-1.73777	0.112798	-0.214427	-0.296234	-0.255331
47*		S	DHRS12	79758		0.698163	0.567363	0.632763	-0.198759	-1.57045	-1.1662	-1.66717	-1.52689	-1.59703	0.0701405	-0.159199	-0.182136	-0.170667
69*		S	LOC400047	400047		0.613844	0.651709	0.632776	-0.19875	-1.57039	-1.16617	-1.71907	-1.97516	-1.84712	0.128043	-0.354821	-0.413166	-0.383993
68*		S	C10orf18	54906		0.665048	0.600677	0.632862	-0.198691	-1.56996	-1.16596	-1.4165	-1.69631	-1.55641	0.139903	-0.125593	-0.183588	-0.15459
20*		S	MSR1	4481		0.53539	0.730386	0.632888	-0.198673	-1.56984	-1.1659	-1.6759	-1.32263	-1.49926	0.176637	-0.202027	-0.00962187	-0.105825
33*		S	HIST1H2BM	8342		0.619317	0.646461	0.632889	-0.198672	-1.56984	-1.16589	-1.78728	-1.75683	-1.77206	0.015224	-0.343469	-0.170175	-0.256822
38*		S	KRT23	25984		0.582499	0.683458	0.632978	-0.198611	-1.5694	-1.16568	-1.89799	-1.58772	-1.74286	0.155137	-0.361933	-0.155842	-0.258888
68*		S	LOC387745	387745		0.656393	0.609802	0.633097	-0.198529	-1.56881	-1.16539	-1.4225	-1.68858	-1.55554	0.133039	-0.131545	-0.178333	-0.154939
22*		S	TNFSF13B	10673		0.68078	0.585895	0.633337	-0.198365	-1.56764	-1.1648	-1.53665	-1.95709	-1.74687	0.21022	-0.14273	-0.369172	-0.255951
63*		S	MMPL1	4328		0.722608	0.544485	0.633547	-0.198222	-1.56662	-1.16429	-1.63975	-1.88246	-1.76111	0.121358	-0.217275	-0.390726	-0.304001
64*		S	ZNF98	148198		0.543305	0.724084	0.633695	-0.19812	-1.5659	-1.16393	-1.9444	-1.54833	-1.74637	0.198032	-0.387696	-0.105525	-0.246611
29*		S	AMELY	444		0.667364	0.600484	0.633924	-0.197963	-1.56477	-1.16336	-1.51754	-1.79428	-1.65591	0.138371	-0.0731421	-0.404967	-0.239055
38*		S	DKFZP434M131	26117		0.651972	0.616061	0.634016	-0.197899	-1.56432	-1.16314	-1.83798	-1.64435	-1.74116	0.0968142	-0.318137	-0.199228	-0.258682
59*		S	OLFML1	283298		0.626818	0.641372	0.634095	-0.197846	-1.56394	-1.16295	-1.5323	-1.71615	-1.62423	0.0919223	-0.215285	-0.309978	-0.262631
38*		S	ARL2BP	23568		0.606732	0.661588	0.63416	-0.197801	-1.56362	-1.16279	-1.87706	-1.6061	-1.74158	0.135482	-0.346657	-0.169921	-0.258289
69*		S	LOC390732	390732		0.536549	0.731855	0.634202	-0.197772	-1.56342	-1.16269	-1.78171	-1.9034	-1.84255	0.0608481	-0.410379	-0.361298	-0.385838
52*		S	C1orf158	93190		0.66336	0.605729	0.634544	-0.197538	-1.56174	-1.16185	-1.54165	-1.64375	-1.5927	0.0510499	-0.171419	-0.14711	-0.159265
36*		S	CORIN	10699		0.667464	0.601764	0.634614	-0.19749	-1.5614	-1.16168	-1.66558	-1.76497	-1.71528	0.0496947	-0.194335	-0.202647	-0.198491
51*		S	ARHGAP12	94134		0.719519	0.549934	0.634726	-0.197413	-1.56086	-1.1614	-1.63726	-2.0875	-1.86238	0.225119	-0.152558	-0.45219	-0.302374
42*		S	TMEM51	55092		0.552049	0.717501	0.634775	-0.19738	-1.56062	-1.16128	-1.60802	-1.52342	-1.56572	0.0423003	-0.174586	-0.183478	-0.179032
53*		S	FAM55B	120406		0.643954	0.625822	0.634888	-0.197303	-1.56007	-1.16101	-1.60122	-1.87359	-1.73741	0.136182	-0.260115	-0.340292	-0.300203
12*		S	GCKR	2646		0.715805	0.554072	0.634938	-0.197268	-1.55982	-1.16088	-1.58013	-1.57028	-1.5752	0.00492633	-0.375495	-0.126766	-0.251131
55*		S	LOC148145	148145		0.535003	0.73505	0.635027	-0.197208	-1.55939	-1.16067	-1.87526	-1.51337	-1.69431	0.180947	-0.3237	-0.0681532	-0.195927
43*		S	NBPF1	55672		0.680982	0.589381	0.635181	-0.197102	-1.55864	-1.16029	-1.57976	-1.8536	-1.71668	0.136921	-0.0980214	-0.394756	-0.246389
25*		S	DGCR6	8214		0.579267	0.691646	0.635456	-0.196914	-1.55729	-1.15962	-1.83731	-1.60259	-1.71995	0.117363	-0.403406	-0.25441	-0.328908
43*		S	ASF1B	55723		0.672587	0.598375	0.635481	-0.196897	-1.55718	-1.15956	-1.58667	-1.84609	-1.71638	0.129713	-0.10264	-0.388693	-0.245667
31*		S	LRRC37A2	474170		0.631038	0.640195	0.635617	-0.196805	-1.55651	-1.15923	-1.95815	-1.53483	-1.74649	0.211665	-0.338704	-0.168889	-0.253797
48*		S	C13orf18	80183		0.678339	0.59294	0.63564	-0.196789	-1.5564	-1.15917	-1.62164	-1.85455	-1.73809	0.116454	-0.229935	-0.520566	-0.375251
57*		S	LOC200261	200261		0.682686	0.589178	0.635932	-0.196589	-1.55498	-1.15846	-1.95133	-1.59158	-1.77145	0.179877	-0.393021	-0.253156	-0.323088
55*		S	C13orf30	144809		0.717281	0.554755	0.636018	-0.196531	-1.55456	-1.15825	-1.71989	-1.67533	-1.69761	0.0222804	-0.214633	-0.179913	-0.197273
25*		S	CNNM2	54805		0.598361	0.674514	0.636437	-0.196244	-1.55252	-1.15722	-1.82084	-1.61691	-1.71888	0.101966	-0.389718	-0.267266	-0.328492
22*		S	GABRQ	55879		0.746008	0.526874	0.636441	-0.196242	-1.5525	-1.15721	-1.48584	-2.0132	-1.74952	0.26368	-0.101484	-0.407593	-0.254539
48*		S	SLC44A4	80736		0.701885	0.57121	0.636548	-0.196169	-1.55198	-1.15695	-1.6016	-1.87304	-1.73732	0.13572	-0.213016	-0.538154	-0.375585
69*		S	LOC387950	387950		0.59388	0.679641	0.63676	-0.196024	-1.55094	-1.15643	-1.73525	-1.95015	-1.8427	0.10745	-0.369171	-0.395089	-0.38213
45*		S	EPB41L5	57669		0.679183	0.594553	0.636868	-0.195951	-1.55042	-1.15617	-1.59447	-1.64568	-1.62007	0.0256047	-0.297608	-0.125044	-0.211326
63*		S	LOC146053	146053		0.656564	0.617201	0.636883	-0.195941	-1.55035	-1.15613	-1.69909	-1.82392	-1.7615	0.0624157	-0.264677	-0.345198	-0.304938
50*		S	ZNF469	84627		0.636428	0.637432	0.63693	-0.195908	-1.55012	-1.15602	-1.45497	-1.70817	-1.58157	0.126599	-0.120208	-0.261999	-0.191103
63*		S	SORDL	116166		0.630545	0.643334	0.636939	-0.195902	-1.55007	-1.15599	-1.72247	-1.80288	-1.76267	0.0402066	-0.283352	-0.328836	-0.306094
68*		S	LOC402714	402714		0.657888	0.616608	0.637248	-0.195692	-1.54857	-1.15524	-1.42147	-1.68281	-1.55214	0.130674	-0.130517	-0.174413	-0.152465
46*		S	CHAC1	79094		0.630251	0.644464	0.637358	-0.195617	-1.54804	-1.15497	-1.56196	-1.56267	-1.56231	0.000356614	-0.102189	-0.196944	-0.149566
20*		S	PTPN18	26469		0.668254	0.606585	0.63742	-0.195575	-1.54774	-1.15482	-1.56852	-1.40904	-1.48878	0.0797425	-0.123336	-0.0904138	-0.106875
42*		S	KIAA1797	54914		0.671515	0.603334	0.637424	-0.195571	-1.54772	-1.15481	-1.5223	-1.61994	-1.57112	0.0488178	-0.108362	-0.271174	-0.189768
30*		S	GMDS	2762		0.566033	0.709184	0.637609	-0.195446	-1.54682	-1.15436	-1.78656	-1.62701	-1.70678	0.0797759	-0.396327	-0.130149	-0.263238
21*		S	DLL3	10683		0.642027	0.633568	0.637798	-0.195317	-1.5459	-1.1539	-1.60455	-1.60328	-1.60391	0.000635084	-0.226961	-0.161034	-0.193997
8*		S	GPR21	2844		0.708304	0.567369	0.637837	-0.195291	-1.54572	-1.1538	-1.53165	-1.72334	-1.6275	0.0958458	-0.142726	-0.294157	-0.218442
51*		S	ZNF766	90321		0.563367	0.712418	0.637892	-0.195253	-1.54544	-1.15366	-1.78761	-1.91807	-1.85284	0.0652297	-0.257511	-0.33825	-0.297881
12*		S	FOXD2	2306		0.657239	0.618739	0.637989	-0.195187	-1.54497	-1.15343	-1.63042	-1.51773	-1.57408	0.0563426	-0.432506	-0.0879577	-0.260232
62*		S	ZCCHC13	389874		0.585753	0.690389	0.638071	-0.195131	-1.54458	-1.15323	-1.57516	-1.61568	-1.59542	0.0202574	-0.231827	-0.270428	-0.251128
50*		S	FBXL10	84678		0.708625	0.567673	0.638149	-0.195078	-1.5442	-1.15304	-1.39816	-1.76905	-1.5836	0.185443	-0.0692746	-0.309919	-0.189597
21*		S	GRP	2922		0.684567	0.592121	0.638344	-0.194945	-1.54325	-1.15256	-1.56964	-1.63715	-1.60339	0.0337569	-0.196816	-0.18634	-0.191578
44*		S	STOX2	56977		0.711107	0.565766	0.638436	-0.194882	-1.5428	-1.15233	-1.98791	-1.78492	-1.88642	0.101495	-0.460578	-0.256221	-0.358399
39*		S	C7orf54	27099		0.593177	0.684067	0.638622	-0.194756	-1.5419	-1.15188	-1.97353	-1.60327	-1.7884	0.185133	-0.387347	-0.262118	-0.324732
52*		S	FMNL3	91010		0.710172	0.567112	0.638642	-0.194743	-1.54181	-1.15183	-1.50603	-1.67281	-1.58942	0.0833904	-0.141218	-0.166883	-0.154051
63*		S	hCG_17324	200373		0.665206	0.612364	0.638785	-0.194645	-1.54111	-1.15148	-1.69132	-1.82781	-1.75957	0.0682453	-0.258474	-0.348227	-0.303351
34*		S	TTC35	9694		0.726543	0.551042	0.638792	-0.19464	-1.54108	-1.15146	-1.80025	-1.67887	-1.73956	0.0606888	-0.285565	-0.217063	-0.251314
44*		S	FAM91A2	57234		0.648524	0.62924	0.638882	-0.194579	-1.54064	-1.15124	-2.05446	-1.73391	-1.89418	0.160275	-0.511462	-0.220679	-0.366071
42*		S	ANKHD1	54882		0.650223	0.628001	0.639112	-0.194423	-1.53953	-1.15068	-1.53758	-1.59909	-1.56833	0.0307524	-0.120165	-0.252226	-0.186195
26*		S	LGALS3	3958		0.538134	0.740098	0.639116	-0.19442	-1.53951	-1.15067	-1.76094	-1.78855	-1.77475	0.0138049	-0.252901	-0.286704	-0.269803
21*		S	GAST	2520		0.679459	0.598983	0.639221	-0.194349	-1.539	-1.15041	-1.57383	-1.63154	-1.60269	0.0288569	-0.200436	-0.182151	-0.191293
55*		S	EFCAB3	146779		0.728258	0.550273	0.639266	-0.194319	-1.53878	-1.15031	-1.71053	-1.67936	-1.69494	0.0155889	-0.208065	-0.182692	-0.195378
20*		S	WASF2	10163		0.649701	0.629015	0.639358	-0.194256	-1.53834	-1.15008	-1.58352	-1.39338	-1.48845	0.0950675	-0.134324	-0.0757761	-0.10505
24*		S	ARL6IP4	51329		0.571807	0.706914	0.63936	-0.194254	-1.53832	-1.15007	-1.71111	-1.47078	-1.59094	0.120165	-0.317308	-0.0657921	-0.19155
50*		S	MPND	84954		0.706791	0.572063	0.639427	-0.194209	-1.538	-1.14991	-1.3996	-1.76521	-1.58241	0.182806	-0.0705684	-0.306903	-0.188736
15*		S	GNPAT	8443		0.583334	0.695828	0.639581	-0.194104	-1.53726	-1.14953	-1.75198	-1.57995	-1.66597	0.0860139	-0.2842	-0.171038	-0.227619
9*		S	MRGPRX1	611		0.743368	0.53631	0.639839	-0.193929	-1.53601	-1.1489	-1.50697	-1.87432	-1.69064	0.183673	-0.112196	-0.3958	-0.253998
42*		S	DDX19A	55308		0.745555	0.534616	0.640085	-0.193762	-1.53481	-1.1483	-1.46918	-1.67803	-1.57361	0.104428	-0.0673183	-0.323959	-0.195639
23*		S	SLC7A9	11136		0.553662	0.726526	0.640094	-0.193756	-1.53477	-1.14828	-1.39938	-1.59087	-1.49513	0.0957443	-0.140448	-0.250172	-0.19531
64*		S	OR1I1	126370		0.731781	0.54854	0.640161	-0.193711	-1.53445	-1.14812	-1.75839	-1.67875	-1.71857	0.0398209	-0.253669	-0.200491	-0.22708
64*		S	LOC345645	345645		0.729003	0.551676	0.640339	-0.19359	-1.53358	-1.14768	-1.76113	-1.67642	-1.71878	0.0423566	-0.255645	-0.198795	-0.22722
39*		S	HOOK2	29911		0.609843	0.67086	0.640351	-0.193582	-1.53353	-1.14765	-1.95787	-1.61384	-1.78586	0.172016	-0.376427	-0.271853	-0.32414
11*		S	2024-09-01	1731		0.606872	0.674389	0.64063	-0.193392	-1.53218	-1.14697	-1.58912	-1.72234	-1.65573	0.0666092	-0.170566	-0.307772	-0.239169
42*		S	NOL8	55035		0.577943	0.703472	0.640707	-0.19334	-1.5318	-1.14678	-1.58944	-1.53528	-1.56236	0.0270804	-0.160232	-0.194254	-0.177243
66*		S	LOC400790	400790		0.734994	0.546559	0.640776	-0.193293	-1.53147	-1.14661	-1.53095	-1.71771	-1.62433	0.093377	-0.218778	-0.336324	-0.277551
68*		S	LOC389676	389676		0.582892	0.699157	0.641024	-0.193125	-1.53027	-1.14601	-1.47343	-1.61288	-1.54316	0.0697227	-0.182096	-0.126874	-0.154485
41*		S	POLE3	54107		0.640133	0.64237	0.641251	-0.192972	-1.52918	-1.14545	-1.67643	-1.65381	-1.66512	0.0113087	-0.306493	-0.146491	-0.226492
28*		S	BRWD2	55717		0.705647	0.576911	0.641279	-0.192953	-1.52904	-1.14538	-1.49382	-1.69887	-1.59634	0.102526	-0.150494	-0.220057	-0.185275
52*		S	DKFZp761E198	91056		0.579094	0.703483	0.641289	-0.192947	-1.529	-1.14536	-1.60577	-1.57018	-1.58797	0.0177918	-0.225783	-0.0970571	-0.16142
17*		S	MMP10	4319		0.684798	0.597803	0.641301	-0.192938	-1.52894	-1.14533	-1.78715	-1.721	-1.75408	0.0330761	-0.338891	-0.268942	-0.303916
31*		S	AADAT	51166		0.634314	0.648553	0.641433	-0.192848	-1.5283	-1.14501	-1.9551	-1.52875	-1.74192	0.213172	-0.336706	-0.163628	-0.250167
22*		S	TNFRSF1B	7133		0.688249	0.594652	0.641451	-0.192837	-1.52821	-1.14496	-1.53083	-1.94876	-1.7398	0.208966	-0.138007	-0.363472	-0.25074
9*		S	SSTR5	5734		0.762297	0.520835	0.641566	-0.192759	-1.52766	-1.14468	-1.49205	-1.88814	-1.6901	0.198046	-0.100198	-0.406736	-0.253467
36*		S	MGAT4B	11282		0.54799	0.735547	0.641768	-0.192622	-1.52668	-1.14419	-1.76272	-1.65185	-1.70728	0.0554354	-0.265622	-0.131011	-0.198316
44*		S	C11orf60	56912		0.630846	0.652776	0.641811	-0.192593	-1.52647	-1.14408	-2.07325	-1.71499	-1.89412	0.179131	-0.525836	-0.2075	-0.366668
64*		S	BTF3L3	132556		0.748597	0.535051	0.641824	-0.192584	-1.52641	-1.14405	-1.7418	-1.68877	-1.71528	0.0265124	-0.241711	-0.207789	-0.22475
32*		S	SOX12	6666		0.701723	0.58244	0.642081	-0.19241	-1.52517	-1.14342	-1.63812	-1.85042	-1.74427	0.106147	-0.254302	-0.343342	-0.298822
66*		S	LOC401056	401056		0.678443	0.60601	0.642227	-0.192312	-1.52447	-1.14307	-1.57843	-1.67326	-1.62584	0.0474138	-0.264474	-0.297325	-0.2809
18*		S	MYL7	58498		0.749232	0.535332	0.642282	-0.192274	-1.5242	-1.14293	-1.73046	-2.17676	-1.95361	0.223153	-0.120047	-0.387476	-0.253761
40*		S	SPTBN5	51332		0.601952	0.682695	0.642324	-0.192246	-1.524	-1.14283	-1.56097	-1.71722	-1.63909	0.0781255	-0.223957	-0.257565	-0.240761
25*		S	E2F3	1871		0.701078	0.583606	0.642342	-0.192234	-1.52391	-1.14278	-1.73225	-1.69293	-1.71259	0.0196596	-0.316081	-0.335484	-0.325782
38*		S	SETBP1	26040		0.693099	0.591727	0.642413	-0.192186	-1.52357	-1.14261	-1.80245	-1.6648	-1.73362	0.0688268	-0.29221	-0.214892	-0.253551
61*		S	C14orf65	317762		0.699726	0.5852	0.642463	-0.192152	-1.52333	-1.14249	-1.48105	-1.88744	-1.68425	0.203192	-0.233961	-0.440539	-0.33725
29*		S	ACLY	162		0.722666	0.562571	0.642618	-0.192047	-1.52258	-1.14211	-1.47484	-1.82967	-1.65225	0.177414	-0.04319	-0.435805	-0.239497
22*		S	CHRND	1144		0.683655	0.601944	0.642799	-0.191924	-1.52171	-1.14167	-1.53441	-1.94183	-1.73812	0.203711	-0.140912	-0.358725	-0.249819
50*		S	HIATL1	84641		0.731208	0.554585	0.642896	-0.191859	-1.52124	-1.14143	-1.38039	-1.78047	-1.58043	0.200039	-0.0533429	-0.318909	-0.186126
60*		S	TMEM145	284339		0.742844	0.543271	0.643057	-0.19175	-1.52046	-1.14104	-1.51289	-1.66012	-1.5865	0.0736156	-0.0289434	-0.258646	-0.143795
50*		S	COX4I2	84701		0.699018	0.587272	0.643145	-0.191691	-1.52004	-1.14082	-1.40572	-1.75194	-1.57883	0.173112	-0.076052	-0.296455	-0.186254
31*		S	PGM5	5239		0.647445	0.639127	0.643286	-0.191596	-1.51936	-1.14048	-1.94284	-1.5356	-1.73922	0.20362	-0.328698	-0.169561	-0.24913
61*		S	LANCL3	347404		0.628315	0.658971	0.643643	-0.191355	-1.51764	-1.1396	-1.53666	-1.8217	-1.67918	0.142522	-0.291537	-0.386053	-0.338795
26*		S	HINT1	3094		0.599886	0.688221	0.644053	-0.191078	-1.51567	-1.1386	-1.70578	-1.83278	-1.76928	0.0634976	-0.213295	-0.319295	-0.266295
35*		S	ATP5L	10632		0.725009	0.563165	0.644087	-0.191055	-1.51551	-1.13852	-1.52516	-1.85834	-1.69175	0.16659	-0.107938	-0.563895	-0.335916
27*		S	PSEN2	5664		0.698018	0.590589	0.644304	-0.19091	-1.51447	-1.13799	-1.48823	-1.77082	-1.62952	0.141294	-0.0777484	-0.243027	-0.160388
33*		S	SORBS2	8470		0.574735	0.713885	0.64431	-0.190905	-1.51444	-1.13797	-1.82596	-1.69737	-1.76166	0.0642938	-0.374809	-0.134855	-0.254832
55*		S	C19orf25	148223		0.575527	0.713151	0.644339	-0.190886	-1.5143	-1.1379	-1.84072	-1.53304	-1.68688	0.15384	-0.299452	-0.0817278	-0.19059
43*		S	C2orf29	55571		0.636076	0.652795	0.644436	-0.190821	-1.51383	-1.13767	-1.61669	-1.80064	-1.70867	0.0919738	-0.122725	-0.35201	-0.237368
46*		S	SPATS2	65244		0.520269	0.769271	0.64477	-0.190595	-1.51223	-1.13685	-1.64594	-1.46593	-1.55594	0.0900052	-0.161168	-0.112623	-0.136895
32*		S	SPRR1B	6699		0.657792	0.63199	0.644891	-0.190514	-1.51164	-1.13655	-1.67319	-1.8092	-1.7412	0.0680024	-0.284474	-0.312526	-0.2985
36*		S	PRR4	11272		0.681211	0.608574	0.644892	-0.190513	-1.51164	-1.13655	-1.6544	-1.75921	-1.70681	0.0524039	-0.186132	-0.199	-0.192566
69*		S	LOC400298	400298		0.770477	0.519358	0.644918	-0.190496	-1.51152	-1.13649	-1.59215	-2.09366	-1.84291	0.250752	-0.242236	-0.49882	-0.370528
54*		S	KBTBD5	131377		0.71542	0.574564	0.644992	-0.190446	-1.51116	-1.13631	-1.51332	-1.62296	-1.56814	0.0548195	-0.1014	-0.250391	-0.175896
67*		S	LOC402301	402301		0.761477	0.528797	0.645137	-0.190348	-1.51046	-1.13595	-1.54137	-1.99971	-1.77054	0.229172	-0.0711081	-0.455707	-0.263408
66*		S	LOC391405	391405		0.695251	0.595144	0.645197	-0.190307	-1.51017	-1.1358	-1.56432	-1.68138	-1.62285	0.0585312	-0.250893	-0.304453	-0.277673
55*		S	LOC149692	149692		0.744536	0.546043	0.645289	-0.190245	-1.50973	-1.13558	-1.69666	-1.68315	-1.68991	0.00675135	-0.198325	-0.185314	-0.191819
43*		S	SLC30A10	55532		0.640813	0.650161	0.645487	-0.190112	-1.50878	-1.1351	-1.6128	-1.80284	-1.70782	0.0950217	-0.120119	-0.353786	-0.236952
42*		S	TTC38	55020		0.605483	0.685927	0.645705	-0.189966	-1.50774	-1.13456	-1.56968	-1.55012	-1.5599	0.00978384	-0.144966	-0.207731	-0.176348
32*		S	RPL7	6129		0.65669	0.63511	0.6459	-0.189835	-1.5068	-1.13409	-1.67407	-1.8066	-1.74034	0.0662649	-0.285231	-0.310586	-0.297909
68*		S	LOC401525	401525		0.634868	0.657312	0.64609	-0.189707	-1.50589	-1.13362	-1.43742	-1.64833	-1.54287	0.105456	-0.146349	-0.150972	-0.148661
35*		S	MVP	9961		0.70483	0.589999	0.647415	-0.188818	-1.49955	-1.13038	-1.54056	-1.83312	-1.68684	0.146277	-0.11974	-0.538913	-0.329326
71*		S	LOC401623	401623		0.713338	0.581985	0.647662	-0.188652	-1.49837	-1.12978	-1.55869	-1.5832	-1.57094	0.012252	-0.247434	-0.182522	-0.214978
20*		S	PPM1G	5496		0.637098	0.658301	0.647699	-0.188626	-1.49818	-1.12969	-1.5937	-1.37294	-1.48332	0.110381	-0.141789	-0.0566642	-0.0992264
34*		S	ISG15	9636		0.730663	0.564958	0.64781	-0.188552	-1.49765	-1.12942	-1.79679	-1.66793	-1.73236	0.0644296	-0.283066	-0.208929	-0.245997
50*		S	C21orf124	85006		0.574682	0.720997	0.64784	-0.188533	-1.49752	-1.12935	-1.50355	-1.63524	-1.5694	0.0658418	-0.163768	-0.204595	-0.184181
34*		S	SLC6A5	9152		0.689156	0.607119	0.648138	-0.188333	-1.49609	-1.12862	-1.83158	-1.63481	-1.73319	0.0983881	-0.308241	-0.184286	-0.246263
62*		S	RBM12B	389677		0.650969	0.64539	0.64818	-0.188305	-1.49589	-1.12851	-1.52185	-1.64898	-1.58542	0.0635611	-0.183138	-0.300958	-0.242048
35*		S	RNASEH2A	10535		0.745272	0.551166	0.648219	-0.188278	-1.4957	-1.12842	-1.5097	-1.86962	-1.68966	0.179962	-0.0960864	-0.575066	-0.335576
59*		S	PTF1A	256297		0.621051	0.675652	0.648351	-0.188189	-1.49507	-1.12809	-1.53694	-1.68842	-1.61268	0.0757447	-0.219701	-0.287207	-0.253454
38*		S	C10orf137	26098		0.627666	0.669221	0.648443	-0.188128	-1.49463	-1.12787	-1.85898	-1.59968	-1.72933	0.129646	-0.33346	-0.165007	-0.249233
68*		S	LOC389958	389958		0.673103	0.623784	0.648443	-0.188128	-1.49463	-1.12787	-1.41092	-1.67673	-1.54383	0.132906	-0.120053	-0.170281	-0.145167
18*		S	ACTA1	58		0.692214	0.604886	0.64855	-0.188057	-1.49412	-1.12761	-1.79801	-2.10018	-1.94909	0.151083	-0.154966	-0.344605	-0.249786
42*		S	ATAD3A	55210		0.670635	0.626635	0.648635	-0.188	-1.49371	-1.1274	-1.52293	-1.60024	-1.56159	0.0386529	-0.108849	-0.253276	-0.181062
18*		S	TPO	7173		0.68424	0.613083	0.648662	-0.187982	-1.49359	-1.12734	-1.80746	-2.09115	-1.94931	0.141847	-0.15985	-0.339552	-0.249701
18*		S	SDHB	6390		0.580208	0.717173	0.64869	-0.187962	-1.49345	-1.12726	-1.93071	-1.97654	-1.95363	0.0229138	-0.223563	-0.275393	-0.249478
19*		S	USP25	29761		0.554566	0.742944	0.648755	-0.187919	-1.49314	-1.12711	-1.77038	-1.51086	-1.64062	0.129758	-0.269589	-0.117358	-0.193473
21*		S	IFNAR1	3454		0.632574	0.664997	0.648786	-0.187899	-1.493	-1.12703	-1.61231	-1.57759	-1.59495	0.0173568	-0.233659	-0.141845	-0.187752
68*		S	CNTNAP3B	389734		0.644111	0.653462	0.648787	-0.187898	-1.49299	-1.12703	-1.43101	-1.65159	-1.5413	0.110289	-0.139992	-0.15319	-0.146591
18*		S	RAB3A	5864		0.567699	0.730187	0.648943	-0.187793	-1.49224	-1.12665	-1.94553	-1.96221	-1.95387	0.00833883	-0.231224	-0.267372	-0.249298
15*		S	NAGLU	4669		0.564248	0.733708	0.648978	-0.18777	-1.49208	-1.12656	-1.76955	-1.55074	-1.66014	0.109405	-0.297734	-0.147527	-0.22263
20*		S	PTPN13	5783		0.593488	0.704534	0.649011	-0.187748	-1.49192	-1.12648	-1.62895	-1.34067	-1.48481	0.144138	-0.167618	-0.0264928	-0.0970552
48*		S	EDC3	80153		0.721886	0.576191	0.649038	-0.18773	-1.49179	-1.12641	-1.58458	-1.8688	-1.72669	0.142112	-0.198644	-0.534123	-0.366384
36*		S	KATNA1	11104		0.647651	0.650657	0.649154	-0.187652	-1.49124	-1.12613	-1.68169	-1.72363	-1.70266	0.020969	-0.206157	-0.176466	-0.191312
30*		S	SLC29A2	3177		0.612263	0.686048	0.649155	-0.187651	-1.49123	-1.12613	-1.74725	-1.64669	-1.69697	0.0502795	-0.362078	-0.143259	-0.252669
30*		S	HOXA3	3200		0.675469	0.622871	0.64917	-0.187642	-1.49116	-1.12609	-1.6935	-1.70044	-1.69697	0.00346707	-0.315253	-0.179058	-0.247156
50*		S	GNPTG	84572		0.74118	0.557423	0.649301	-0.187554	-1.49053	-1.12577	-1.37254	-1.77799	-1.57527	0.202724	-0.0463079	-0.31696	-0.181634
41*		S	CUTA	51596		0.753454	0.545283	0.649369	-0.187509	-1.49021	-1.12561	-1.58395	-1.73356	-1.65876	0.0748037	-0.224783	-0.199668	-0.212226
16*		S	CYP17A1	1586		0.678211	0.621022	0.649617	-0.187343	-1.48903	-1.125	-1.85701	-1.58422	-1.72062	0.136395	-0.385167	-0.239791	-0.312479
50*		S	SPZ1	84654		0.6901	0.609188	0.649644	-0.187325	-1.4889	-1.12493	-1.41274	-1.73282	-1.57278	0.16004	-0.0823434	-0.2814	-0.181872
26*		S	IGKC	3514		0.644596	0.655442	0.650019	-0.187074	-1.48711	-1.12402	-1.66585	-1.86072	-1.76328	0.0974383	-0.184619	-0.339888	-0.262253
54*		S	LYG1	129530		0.722801	0.57724	0.650021	-0.187073	-1.4871	-1.12401	-1.50725	-1.62101	-1.56413	0.0568805	-0.0967149	-0.248691	-0.172703
63*		S	LOC339553	339553		0.570879	0.729469	0.650174	-0.18697	-1.48637	-1.12364	-1.77608	-1.73353	-1.7548	0.0212726	-0.326176	-0.274906	-0.300541
20*		S	SEMA6B	10501		0.616601	0.68379	0.650196	-0.186956	-1.48627	-1.12359	-1.61027	-1.35515	-1.48271	0.127559	-0.153928	-0.0400302	-0.0969793
68*		S	LOC389819	389819		0.680335	0.620059	0.650197	-0.186955	-1.48626	-1.12358	-1.40591	-1.67989	-1.5429	0.136989	-0.115079	-0.172426	-0.143752
42*		S	APPL2	55198		0.673732	0.627402	0.650567	-0.186708	-1.4845	-1.12268	-1.52071	-1.59959	-1.56015	0.0394398	-0.107133	-0.252686	-0.179909
28*		S	RIOK2	55781		0.544146	0.757224	0.650685	-0.186629	-1.48394	-1.12239	-1.61318	-1.55654	-1.58486	0.0283229	-0.257976	-0.117885	-0.187931
27*		S	MMAB	326625		0.717964	0.58349	0.650727	-0.186601	-1.48374	-1.12229	-1.47209	-1.77817	-1.62513	0.153041	-0.065425	-0.248119	-0.156772
21*		S	CX3CL1	6376		0.729183	0.572303	0.650743	-0.18659	-1.48366	-1.12225	-1.53302	-1.65335	-1.59318	0.0601624	-0.165201	-0.198441	-0.181821
49*		S	TSPAN10	83882		0.580292	0.72151	0.650901	-0.186485	-1.48291	-1.12186	-1.71992	-1.4655	-1.59271	0.127212	-0.177428	-0.158455	-0.167941
44*		S	THOC2	57187		0.611735	0.690311	0.651023	-0.186404	-1.48233	-1.12156	-2.09357	-1.68482	-1.8892	0.204375	-0.541374	-0.186482	-0.363928
32*		S	SYCP1	6847		0.735615	0.566685	0.65115	-0.186319	-1.48173	-1.12125	-1.61106	-1.86352	-1.73729	0.126229	-0.231025	-0.35314	-0.292083
61*		S	EP400NL	347918		0.758689	0.543814	0.651251	-0.186251	-1.48124	-1.121	-1.43514	-1.92432	-1.67973	0.244587	-0.186422	-0.471106	-0.328764
58*		S	SEMA3D	223117		0.618753	0.683843	0.651298	-0.18622	-1.48102	-1.12089	-1.58706	-1.80895	-1.698	0.110942	-0.180111	-0.262434	-0.221272
53*		S	LRG1	116844		0.706461	0.596271	0.651366	-0.186175	-1.4807	-1.12072	-1.54943	-1.8993	-1.72436	0.174937	-0.212383	-0.358673	-0.285528
70*		S	LOC400933	400933		0.621465	0.681672	0.651568	-0.18604	-1.47974	-1.12023	-1.54326	-1.62397	-1.58362	0.040355	-0.11729	-0.225189	-0.171239
28*		S	RASSF2	9770		0.691628	0.611686	0.651657	-0.185981	-1.47932	-1.12001	-1.50418	-1.67142	-1.5878	0.0836204	-0.159824	-0.200352	-0.180088
63*		S	LOC128192	128192		0.705658	0.598418	0.652038	-0.185727	-1.47751	-1.11908	-1.65498	-1.83904	-1.74701	0.0920325	-0.229441	-0.356959	-0.2932
30*		S	HIST1H2AE	3012		0.66298	0.641299	0.652139	-0.185659	-1.47702	-1.11883	-1.70412	-1.68476	-1.69444	0.00968163	-0.324506	-0.168616	-0.246561
64*		S	PFN3	345456		0.544642	0.760187	0.652415	-0.185476	-1.47572	-1.11816	-1.94308	-1.52151	-1.7323	0.210784	-0.386746	-0.085994	-0.23637
24*		S	SLC25A19	60386		0.64892	0.655926	0.652423	-0.185471	-1.47568	-1.11814	-1.64605	-1.51213	-1.57909	0.0669565	-0.261243	-0.0967835	-0.179013
47*		S	NCRNA00115	79854		0.539825	0.76507	0.652447	-0.185454	-1.47556	-1.11808	-1.79959	-1.38269	-1.59114	0.208452	-0.246608	-0.0548302	-0.150719
55*		S	PRICKLE1	144165		0.54925	0.755652	0.652451	-0.185452	-1.47554	-1.11807	-1.86312	-1.49486	-1.67899	0.184129	-0.315175	-0.0553826	-0.185279
22*		S	TGFB3	7043		0.757594	0.548356	0.652975	-0.185103	-1.47306	-1.11679	-1.47682	-1.99278	-1.7348	0.257981	-0.0941582	-0.393609	-0.243883
60*		S	STON1-GTF2A1L	286749		0.750928	0.555392	0.65316	-0.18498	-1.47218	-1.11634	-1.50638	-1.65086	-1.57862	0.0722432	-0.0250019	-0.250894	-0.137948
23*		S	APOC1	341		0.627163	0.679674	0.653419	-0.184809	-1.47095	-1.11571	-1.34599	-1.63072	-1.48836	0.142366	-0.0834245	-0.286718	-0.185071
38*		S	UNC84B	25777		0.557119	0.749897	0.653508	-0.184749	-1.47053	-1.11549	-1.91992	-1.5319	-1.72591	0.194012	-0.377933	-0.113074	-0.245503
15*		S	MBTPS1	8720		0.510107	0.797059	0.653583	-0.184699	-1.47017	-1.1153	-1.81938	-1.50188	-1.66063	0.158753	-0.336126	-0.108207	-0.222167
30*		S	MAGEA1	4100		0.540894	0.766393	0.653644	-0.184659	-1.46989	-1.11516	-1.80793	-1.57833	-1.69313	0.1148	-0.414951	-0.0977321	-0.256342
32*		S	RPS26	6231		0.700271	0.607065	0.653668	-0.184643	-1.46977	-1.1151	-1.63928	-1.82993	-1.73461	0.0953257	-0.2553	-0.328027	-0.291663
39*		S	TAGLN3	29114		0.657255	0.650091	0.653673	-0.184639	-1.46975	-1.11508	-1.91333	-1.63047	-1.7719	0.141426	-0.34536	-0.287163	-0.316261
67*		S	C6orf222	389384		0.629152	0.678208	0.65368	-0.184635	-1.46972	-1.11507	-1.64353	-1.86174	-1.75263	0.109106	-0.138275	-0.353097	-0.245686
50*		S	NUDCD1	84955		0.738581	0.568949	0.653765	-0.184578	-1.46931	-1.11486	-1.37459	-1.76793	-1.57126	0.196672	-0.0481414	-0.309042	-0.178592
21*		S	NMB	4828		0.606624	0.701143	0.653883	-0.1845	-1.46875	-1.11457	-1.6336	-1.54805	-1.59083	0.0427752	-0.252048	-0.119775	-0.185911
47*		S	CCDC82	79780		0.667605	0.640381	0.653993	-0.184427	-1.46823	-1.1143	-1.69273	-1.47363	-1.58318	0.109547	-0.176068	-0.135119	-0.155593
16*		S	ACHE	43		0.598177	0.709867	0.654022	-0.184408	-1.4681	-1.11423	-1.92698	-1.51451	-1.72075	0.206234	-0.440749	-0.176216	-0.308482
18*		S	TMEM115	11070		0.657666	0.650709	0.654188	-0.184298	-1.46731	-1.11383	-1.83894	-2.04972	-1.94433	0.10539	-0.176125	-0.31636	-0.246243
54*		S	RFTN2	130132		0.692266	0.616326	0.654296	-0.184226	-1.4668	-1.11356	-1.53235	-1.59262	-1.56248	0.030133	-0.116097	-0.223864	-0.16998
66*		S	LOC391656	391656		0.725961	0.58274	0.65435	-0.18419	-1.46654	-1.11343	-1.53854	-1.69066	-1.6146	0.0760591	-0.226077	-0.31259	-0.269334
46*		S	VPS16	64601		0.641962	0.667177	0.65457	-0.184044	-1.4655	-1.11289	-1.55301	-1.54507	-1.54904	0.00397447	-0.0959087	-0.181599	-0.138754
52*		S	WDR20	91833		0.586792	0.722361	0.654577	-0.18404	-1.46547	-1.11288	-1.59991	-1.55598	-1.57794	0.0219662	-0.220817	-0.087391	-0.154104
55*		S	ASB15	142685		0.715088	0.594649	0.654868	-0.183846	-1.46409	-1.11216	-1.72176	-1.63949	-1.68063	0.0411337	-0.215945	-0.155184	-0.185565
47*		S	LRRC2	79442		0.759843	0.550002	0.654922	-0.18381	-1.46383	-1.11203	-1.61558	-1.53955	-1.57757	0.0380165	-0.12515	-0.193314	-0.159232
18*		S	RASGRF1	5923		0.629646	0.68059	0.655118	-0.18368	-1.46291	-1.11155	-1.87214	-2.01682	-1.94448	0.0723406	-0.193285	-0.297942	-0.245614
38*		S	ZNF318	24149		0.74697	0.563483	0.655227	-0.183609	-1.4624	-1.11129	-1.75591	-1.68853	-1.72222	0.0336923	-0.258249	-0.233074	-0.245662
18*		S	PLCD1	5333		0.717222	0.593462	0.655342	-0.183532	-1.46185	-1.111	-1.76838	-2.11276	-1.94057	0.172187	-0.139651	-0.351646	-0.245648
22*		S	MED1	5469		0.737451	0.573523	0.655487	-0.183436	-1.46116	-1.11065	-1.49251	-1.96885	-1.73068	0.238173	-0.106895	-0.377226	-0.242061
61*		S	CSN1S2A	286828		0.670151	0.64116	0.655655	-0.183324	-1.46037	-1.11024	-1.50408	-1.83758	-1.67083	0.166745	-0.257806	-0.399207	-0.328507
62*		S	C5orf46	389336		0.651372	0.660372	0.655872	-0.183181	-1.45935	-1.10971	-1.52152	-1.63789	-1.57971	0.0581827	-0.182838	-0.290793	-0.236816
44*		S	BDH2	56898		0.552252	0.759496	0.655874	-0.18318	-1.45934	-1.1097	-2.15682	-1.62922	-1.89302	0.263802	-0.589739	-0.147742	-0.36874
23*		S	SLC22A12	116085		0.703829	0.607944	0.655887	-0.183171	-1.45928	-1.10967	-1.2903	-1.69173	-1.49102	0.200716	-0.0239451	-0.34267	-0.183308
68*		S	LOC401529	401529		0.77244	0.539626	0.656033	-0.183074	-1.45859	-1.10931	-1.34209	-1.74803	-1.54506	0.202972	-0.0517335	-0.218746	-0.13524
61*		S	MGC39900	286527		0.672945	0.639452	0.656199	-0.182965	-1.4578	-1.10891	-1.50191	-1.8391	-1.6705	0.168594	-0.255554	-0.400469	-0.328011
69*		S	LOC390205	390205		0.643603	0.668941	0.656272	-0.182916	-1.45746	-1.10873	-1.69496	-1.95973	-1.82735	0.132385	-0.333431	-0.402014	-0.367722
25*		S	INTS6	26512		0.689072	0.623789	0.656431	-0.182811	-1.45671	-1.10834	-1.7426	-1.65933	-1.70097	0.0416376	-0.324688	-0.30533	-0.315009
59*		S	GCET2	257144		0.595674	0.717766	0.65672	-0.18262	-1.45534	-1.10763	-1.55732	-1.65437	-1.60584	0.0485248	-0.239132	-0.259233	-0.249183
30*		S	GYPB	2994		0.695357	0.618092	0.656725	-0.182617	-1.45532	-1.10762	-1.67659	-1.7045	-1.69055	0.0139554	-0.30052	-0.181766	-0.241143
65*		S	OR13D1	286365		0.605062	0.708434	0.656748	-0.182601	-1.45521	-1.10757	-1.65874	-1.53279	-1.59577	0.0629725	-0.349637	-0.0617229	-0.20568
12*		S	RAPGEF5	9771		0.683483	0.630352	0.656918	-0.182489	-1.45441	-1.10715	-1.60788	-1.5083	-1.55809	0.0497929	-0.406959	-0.0809885	-0.243974
21*		S	ITGB1	3688		0.754997	0.558971	0.656984	-0.182445	-1.4541	-1.10699	-1.51184	-1.66424	-1.58804	0.0762025	-0.146909	-0.206581	-0.176745
23*		S	SLC2A1	6513		0.55515	0.758828	0.656989	-0.182442	-1.45407	-1.10698	-1.3983	-1.5634	-1.48085	0.0825476	-0.139294	-0.224975	-0.182134
68*		S	DNAJC2	27000		0.739211	0.574797	0.657004	-0.182432	-1.454	-1.10694	-1.36511	-1.71823	-1.54167	0.176561	-0.0745869	-0.198492	-0.136539
33*		S	UGT2B7	7364		0.698331	0.61568	0.657006	-0.182431	-1.454	-1.10694	-1.71874	-1.78398	-1.75136	0.0326219	-0.287923	-0.1863	-0.237112
40*		S	NIP7	51388		0.639172	0.675069	0.65712	-0.182355	-1.45345	-1.10666	-1.53168	-1.72385	-1.62776	0.0960831	-0.197301	-0.262616	-0.229958
43*		S	PCDHGA4	56111		0.794982	0.519757	0.65737	-0.18219	-1.45228	-1.10605	-1.48601	-1.91175	-1.69888	0.212873	-0.0353081	-0.441688	-0.238498
54*		S	KCTD18	130535		0.717947	0.596885	0.657416	-0.18216	-1.45206	-1.10593	-1.51124	-1.60674	-1.55899	0.047749	-0.0997961	-0.236213	-0.168004
12*		S	FGD1	2245		0.613695	0.701247	0.657471	-0.182123	-1.4518	-1.1058	-1.66781	-1.45069	-1.55925	0.108557	-0.474893	-0.0384427	-0.256668
49*		S	TMEM120A	83862		0.560284	0.754788	0.657536	-0.18208	-1.4515	-1.10564	-1.7369	-1.43979	-1.58834	0.148558	-0.18836	-0.133588	-0.160974
52*		S	RFT1	91869		0.701918	0.61316	0.657539	-0.182078	-1.45148	-1.10563	-1.51231	-1.63815	-1.57523	0.0629236	-0.146543	-0.143305	-0.144924
69*		S	LOC400400	400400		0.546766	0.769086	0.657926	-0.181823	-1.44966	-1.10469	-1.77343	-1.87007	-1.82175	0.0483205	-0.403035	-0.337203	-0.370119
43*		S	CDV3	55573		0.545123	0.771394	0.658258	-0.181604	-1.4481	-1.10387	-1.6915	-1.70159	-1.69654	0.00504702	-0.17276	-0.272066	-0.222413
18*		S	PPP2R3B	28227		0.708353	0.60828	0.658316	-0.181565	-1.44782	-1.10373	-1.77889	-2.09644	-1.93767	0.158775	-0.145082	-0.342513	-0.243798
68*		S	WDR38	401551		0.56403	0.752686	0.658358	-0.181538	-1.44763	-1.10363	-1.4865	-1.56753	-1.52702	0.0405134	-0.195068	-0.0960479	-0.145558
40*		S	FHOD1	29109		0.57482	0.742027	0.658424	-0.181495	-1.44732	-1.10347	-1.58231	-1.66563	-1.62397	0.0416583	-0.243387	-0.21827	-0.230828
27*		S	HOXD3	3232		0.70685	0.610062	0.658456	-0.181473	-1.44717	-1.10339	-1.48108	-1.75065	-1.61587	0.134784	-0.0722916	-0.229059	-0.150676
70*		S	LOC400832	400832		0.640184	0.676763	0.658474	-0.181462	-1.44708	-1.10335	-1.5295	-1.62819	-1.57885	0.0493416	-0.106874	-0.228691	-0.167783
50*		S	SPSB3	90864		0.707823	0.609201	0.658512	-0.181436	-1.4469	-1.10325	-1.39879	-1.7328	-1.5658	0.167007	-0.0698404	-0.281391	-0.175616
18*		S	PPP1R7	5510		0.728686	0.588356	0.658521	-0.18143	-1.44686	-1.10323	-1.7548	-2.11838	-1.93659	0.181789	-0.13263	-0.354793	-0.243712
23*		S	NUMA1	4926		0.626951	0.690403	0.658677	-0.181328	-1.44613	-1.10285	-1.34615	-1.6216	-1.48387	0.137726	-0.083589	-0.278349	-0.180969
57*		S	CENPV	201161		0.76295	0.555043	0.658996	-0.181117	-1.44462	-1.10207	-1.87748	-1.61792	-1.7477	0.129781	-0.341213	-0.277484	-0.309349
18*		S	RALGDS	5900		0.658614	0.659452	0.659033	-0.181093	-1.44445	-1.10198	-1.83782	-2.0401	-1.93896	0.101138	-0.175544	-0.310971	-0.243258
52*		S	KCTD12	115207		0.62313	0.694969	0.659049	-0.181082	-1.44438	-1.10194	-1.57226	-1.57659	-1.57442	0.00216569	-0.197373	-0.101417	-0.149395
30*		S	KCNJ13	3769		0.543795	0.774644	0.659219	-0.18097	-1.44358	-1.10152	-1.80547	-1.57131	-1.68839	0.117076	-0.412802	-0.0930567	-0.252929
30*		S	GTF2H3	2967		0.610818	0.707675	0.659246	-0.180952	-1.44345	-1.10146	-1.74848	-1.62829	-1.68838	0.0600937	-0.363149	-0.131004	-0.247077
63*		S	FLJ45248	401472		0.683114	0.635448	0.659281	-0.180929	-1.44329	-1.10137	-1.67523	-1.80923	-1.74223	0.066998	-0.245621	-0.333774	-0.289697
64*		S	LOC153297	153297		0.550131	0.768581	0.659356	-0.18088	-1.44294	-1.10119	-1.93766	-1.51528	-1.72647	0.211193	-0.382842	-0.081453	-0.232148
26*		S	LGALS7	3963		0.558062	0.760725	0.659393	-0.180855	-1.44276	-1.1011	-1.74314	-1.77097	-1.75705	0.0139125	-0.24012	-0.273746	-0.256933
21*		S	NMU	10874		0.648258	0.67065	0.659454	-0.180815	-1.44247	-1.10095	-1.59943	-1.57297	-1.5862	0.0132311	-0.222545	-0.138393	-0.180469
18*		S	ANXA3	306		0.68136	0.637672	0.659516	-0.180775	-1.44218	-1.1008	-1.81087	-2.06408	-1.93747	0.126603	-0.161614	-0.324396	-0.243005
34*		S	SEC22C	9117		0.73694	0.582107	0.659524	-0.18077	-1.44215	-1.10078	-1.79153	-1.65446	-1.723	0.0685365	-0.279259	-0.198905	-0.239082
60*		S	THEM5	284486		0.667447	0.65166	0.659554	-0.18075	-1.44201	-1.10071	-1.57362	-1.57735	-1.57548	0.00186807	-0.0657043	-0.189323	-0.127514
37*		S	ARL6IP1	23204		0.783675	0.535605	0.65964	-0.180693	-1.4416	-1.1005	-1.4478	-1.7948	-1.6213	0.173502	-0.124544	-0.309183	-0.216863
38*		S	PDSS1	23590		0.677312	0.642514	0.659913	-0.180513	-1.44032	-1.09983	-1.81609	-1.62212	-1.71911	0.0969824	-0.302162	-0.182199	-0.242181
30*		S	LY75	4065		0.641221	0.67863	0.659926	-0.180505	-1.44026	-1.0998	-1.72263	-1.653	-1.68781	0.0348125	-0.340625	-0.147463	-0.244044
31*		S	NDUFB10	4716		0.657057	0.663054	0.660056	-0.18042	-1.43965	-1.09948	-1.93387	-1.51822	-1.72604	0.207826	-0.322837	-0.154501	-0.238669
36*		S	SAPS1	22870		0.754977	0.565195	0.660086	-0.180399	-1.43951	-1.09941	-1.59443	-1.79589	-1.69516	0.100731	-0.142118	-0.222228	-0.182173
21*		S	GDF11	10220		0.630839	0.689603	0.660221	-0.180311	-1.43887	-1.09908	-1.61373	-1.55748	-1.58561	0.0281234	-0.234889	-0.126821	-0.180855
41*		S	FXYD6	53826		0.574401	0.746103	0.660252	-0.18029	-1.43873	-1.099	-1.73007	-1.56861	-1.64934	0.0807325	-0.353889	-0.0896742	-0.221781
17*		S	PLA2G1B	5319		0.595479	0.725217	0.660348	-0.180227	-1.43828	-1.09877	-1.86747	-1.62054	-1.744	0.123464	-0.403375	-0.190275	-0.296825
37*		S	SEZ6L	23544		0.735368	0.58591	0.660639	-0.180036	-1.43691	-1.09805	-1.48802	-1.75632	-1.62217	0.134152	-0.161751	-0.279938	-0.220845
57*		S	CLYBL	171425		0.762231	0.55944	0.660836	-0.179907	-1.43599	-1.09757	-1.87814	-1.61452	-1.74633	0.131809	-0.341677	-0.274351	-0.308014
21*		S	FLNA	2316		0.642047	0.679653	0.66085	-0.179897	-1.43592	-1.09754	-1.60453	-1.56561	-1.58507	0.0194586	-0.226947	-0.132896	-0.179921
48*		S	BHLHB9	80823		0.774497	0.547321	0.660909	-0.179858	-1.43565	-1.09739	-1.5398	-1.89337	-1.71658	0.176784	-0.160841	-0.55749	-0.359165
22*		S	S100A6	6277		0.716115	0.605758	0.660937	-0.17984	-1.43552	-1.09733	-1.50913	-1.93821	-1.72367	0.21454	-0.120387	-0.356242	-0.238314
25*		S	COX17	10063		0.759473	0.562639	0.661056	-0.179762	-1.43496	-1.09703	-1.68188	-1.71046	-1.69617	0.0142901	-0.274218	-0.351218	-0.312718
16*		S	TNNT2	7139		0.645922	0.676319	0.66112	-0.179719	-1.43466	-1.09688	-1.88524	-1.54084	-1.71304	0.172202	-0.407591	-0.200222	-0.303906
32*		S	PSME2	5721		0.60064	0.721655	0.661147	-0.179702	-1.43453	-1.09681	-1.71882	-1.73461	-1.72672	0.00789551	-0.323727	-0.256762	-0.290244
52*		S	UGT3A1	133688		0.746647	0.575794	0.66122	-0.179654	-1.43419	-1.09663	-1.47827	-1.66627	-1.57227	0.0940009	-0.117686	-0.162438	-0.140062
68*		S	LOC286297	286297		0.612451	0.70999	0.66122	-0.179654	-1.43419	-1.09663	-1.45295	-1.6037	-1.52833	0.0753755	-0.161767	-0.120636	-0.141201
59*		S	C17orf52	283994		0.685603	0.6369	0.661251	-0.179633	-1.43404	-1.09656	-1.48509	-1.71976	-1.60243	0.117336	-0.170272	-0.312948	-0.24161
61*		S	LOC340508	340508		0.777718	0.54482	0.661269	-0.179622	-1.43396	-1.09651	-1.42032	-1.92342	-1.67187	0.251548	-0.17108	-0.470363	-0.320721
26*		S	FOXG1C	2292		0.769355	0.553435	0.661395	-0.179539	-1.43337	-1.09621	-1.55441	-1.94769	-1.75105	0.19664	-0.104601	-0.403971	-0.254286
8*		S	ADRA2A	150		0.691935	0.631787	0.661861	-0.179233	-1.43119	-1.09507	-1.54569	-1.66552	-1.6056	0.059914	-0.154307	-0.253506	-0.203906
27*		S	HSPB3	8988		0.667422	0.656519	0.661971	-0.179161	-1.43068	-1.0948	-1.51299	-1.70254	-1.60776	0.0947744	-0.0966519	-0.195737	-0.146194
26*		S	INPP4A	3631		0.628078	0.695927	0.662003	-0.17914	-1.43053	-1.09472	-1.6806	-1.82621	-1.7534	0.0728038	-0.195213	-0.314454	-0.254833
68*		S	LOC401480	401480		0.653224	0.671263	0.662243	-0.178982	-1.4294	-1.09413	-1.4247	-1.63651	-1.5306	0.105907	-0.133725	-0.142938	-0.138331
16*		S	TP53INP1	94241		0.718328	0.606304	0.662316	-0.178935	-1.42906	-1.09395	-1.82194	-1.59577	-1.70886	0.113085	-0.357307	-0.250323	-0.303815
63*		S	LOC283530	283530		0.630033	0.695143	0.662588	-0.178756	-1.42779	-1.09329	-1.72293	-1.76117	-1.74205	0.0191207	-0.283719	-0.296398	-0.290059
59*		S	TMEM151A	256472		0.594562	0.730658	0.66261	-0.178742	-1.42769	-1.09324	-1.55821	-1.64394	-1.60107	0.0428652	-0.239984	-0.250669	-0.245327
70*		S	LOC388401	388401		0.624984	0.700898	0.662941	-0.178525	-1.42614	-1.09243	-1.54068	-1.60746	-1.57407	0.0333939	-0.115332	-0.211471	-0.163402
67*		S	LOC392630	392630		0.671731	0.654206	0.662968	-0.178507	-1.42601	-1.09236	-1.61065	-1.8839	-1.74728	0.136625	-0.116662	-0.369581	-0.243122
39*		S	TIMM8B	26521		0.721057	0.605144	0.6631	-0.178421	-1.42539	-1.09204	-1.85338	-1.66647	-1.75992	0.0934567	-0.303553	-0.320296	-0.311925
44*		S	CYP20A1	57404		0.565914	0.76054	0.663227	-0.178338	-1.4248	-1.09173	-2.14229	-1.62838	-1.88534	0.256958	-0.57863	-0.147158	-0.362894
44*		S	PNO1	56902		0.572331	0.754154	0.663242	-0.178328	-1.42473	-1.09169	-2.13547	-1.63351	-1.88449	0.25098	-0.573413	-0.150734	-0.362073
56*		S	SGOL1	151648		0.762269	0.564368	0.663319	-0.178278	-1.42438	-1.0915	-1.50018	-1.59011	-1.54515	0.0449678	-0.142213	-0.133386	-0.137799
27*		S	IFRG28	64108		0.644134	0.682717	0.663426	-0.178208	-1.42388	-1.09124	-1.53183	-1.6754	-1.60362	0.0717857	-0.11104	-0.176946	-0.143993
54*		S	GLYCTK	132158		0.609516	0.717597	0.663556	-0.178122	-1.42326	-1.09092	-1.60036	-1.51903	-1.5597	0.0406628	-0.168624	-0.159535	-0.164079
26*		S	C2orf12	192137		0.576378	0.751039	0.663709	-0.178023	-1.42256	-1.09055	-1.72678	-1.77922	-1.753	0.0262215	-0.228372	-0.279831	-0.254102
55*		S	RP11-78J21.1	144983		0.624551	0.70303	0.66379	-0.177969	-1.42217	-1.09035	-1.79893	-1.54213	-1.67053	0.1284	-0.270118	-0.0880015	-0.17906
24*		S	BIN1	274		0.554495	0.773467	0.663981	-0.177844	-1.42128	-1.08988	-1.72571	-1.4168	-1.57126	0.154457	-0.329895	-0.02534	-0.177618
18*		S	PSME1	5720		0.692688	0.635394	0.664041	-0.177805	-1.421	-1.08974	-1.79745	-2.06659	-1.93202	0.134568	-0.154676	-0.3258	-0.240238
37*		S	SLC35A3	23443		0.633716	0.694407	0.664061	-0.177792	-1.42091	-1.08969	-1.57264	-1.67332	-1.62298	0.0503395	-0.240046	-0.216864	-0.228455
63*		S	HNRNPCL1	343069		0.689873	0.638309	0.664091	-0.177772	-1.42077	-1.08961	-1.66916	-1.80692	-1.73804	0.0688828	-0.24077	-0.331982	-0.286376
62*		S	C5orf48	389320		0.696886	0.631317	0.664102	-0.177766	-1.42072	-1.08959	-1.48432	-1.65939	-1.57186	0.0875348	-0.148858	-0.310506	-0.229682
70*		S	LOC400662	400662		0.637331	0.691007	0.664169	-0.177721	-1.42041	-1.08942	-1.5316	-1.61596	-1.57378	0.0421778	-0.108462	-0.218528	-0.163495
42*		S	C20orf27	54976		0.662693	0.66589	0.664292	-0.177641	-1.41984	-1.08912	-1.52863	-1.56705	-1.54784	0.0192106	-0.113252	-0.223122	-0.168187
53*		S	GYLTL1B	120071		0.763381	0.565342	0.664362	-0.177596	-1.41951	-1.08895	-1.50226	-1.92621	-1.71424	0.211977	-0.168918	-0.377912	-0.273415
50*		S	NTNG2	84628		0.670254	0.658497	0.664376	-0.177586	-1.41944	-1.08892	-1.42835	-1.68978	-1.55907	0.130715	-0.0963442	-0.247528	-0.171936
64*		S	LOC342991	342991		0.686935	0.641871	0.664403	-0.177568	-1.41932	-1.08885	-1.80265	-1.60941	-1.70603	0.0966193	-0.28556	-0.150001	-0.21778
63*		S	LOC338918	338918		0.64127	0.687599	0.664435	-0.177548	-1.41917	-1.08877	-1.71283	-1.76724	-1.74004	0.0272058	-0.275654	-0.301121	-0.288388
24*		S	ADAM3B	1596		0.570255	0.758648	0.664451	-0.177537	-1.41909	-1.08873	-1.71242	-1.42882	-1.57062	0.141799	-0.318437	-0.0343472	-0.176392
20*		S	HLA-DRA	3122		0.561119	0.767894	0.664506	-0.177501	-1.41883	-1.0886	-1.65511	-1.29645	-1.47578	0.17933	-0.186789	0.0148557	-0.0859666
21*		S	INSL4	3641		0.750911	0.578136	0.664524	-0.17749	-1.41875	-1.08856	-1.51519	-1.64858	-1.58189	0.0666945	-0.149804	-0.194879	-0.172342
23*		S	DRP2	1821		0.564808	0.764358	0.664583	-0.177451	-1.41848	-1.08841	-1.39129	-1.5587	-1.47499	0.0837038	-0.131801	-0.220661	-0.176231
61*		S	ITIH5L	347365		0.732527	0.596755	0.664641	-0.177413	-1.41821	-1.08827	-1.45551	-1.87714	-1.66633	0.210815	-0.207515	-0.432004	-0.31976
22*		S	PTHLH	5744		0.766594	0.562721	0.664658	-0.177402	-1.41813	-1.08823	-1.4698	-1.97912	-1.72446	0.254658	-0.0884672	-0.384258	-0.236362
39*		S	ERVWE1	30816		0.781464	0.548041	0.664752	-0.17734	-1.41769	-1.088	-1.79662	-1.71219	-1.75441	0.0422148	-0.263971	-0.36239	-0.313181
40*		S	TEX264	51368		0.743987	0.585523	0.664755	-0.177338	-1.41768	-1.08799	-1.44921	-1.8017	-1.62546	0.176246	-0.122237	-0.321921	-0.222079
35*		S	TINP1	10412		0.645095	0.684435	0.664765	-0.177332	-1.41763	-1.08797	-1.58614	-1.74433	-1.66524	0.0790945	-0.154677	-0.450994	-0.302835
52*		S	NAF1	92345		0.661246	0.668376	0.664811	-0.177302	-1.41741	-1.08785	-1.54325	-1.5966	-1.56993	0.0266735	-0.172783	-0.115033	-0.143908
68*		S	OR13C2	392376		0.622054	0.707656	0.664855	-0.177273	-1.41721	-1.08775	-1.4463	-1.60568	-1.52599	0.0796914	-0.155162	-0.12198	-0.138571
63*		S	LOC122867	122867		0.718199	0.611942	0.665071	-0.177132	-1.41621	-1.08722	-1.64371	-1.82815	-1.73593	0.0922225	-0.22044	-0.348491	-0.284465
20*		S	SIVA1	10572		0.579965	0.750386	0.665176	-0.177064	-1.41572	-1.08696	-1.63988	-1.30867	-1.47427	0.165605	-0.175627	0.00343004	-0.0860985
54*		S	SLCO6A1	133482		0.625801	0.70518	0.66549	-0.176858	-1.41425	-1.08619	-1.58698	-1.52806	-1.55752	0.0294597	-0.158287	-0.167422	-0.162855
58*		S	CCDC129	223075		0.621849	0.70924	0.665544	-0.176823	-1.414	-1.08606	-1.58435	-1.78753	-1.68594	0.101591	-0.17791	-0.247778	-0.212844
57*		S	ANO6	196527		0.765579	0.56559	0.665585	-0.176797	-1.41381	-1.08596	-1.87506	-1.60978	-1.74242	0.132641	-0.339516	-0.269968	-0.304742
58*		S	C9orf25	203259		0.745612	0.585902	0.665757	-0.176684	-1.41301	-1.08554	-1.47583	-1.89154	-1.68368	0.207852	-0.089936	-0.318953	-0.204445
9*		S	SSTR4	5733		0.669265	0.66231	0.665787	-0.176664	-1.41287	-1.08547	-1.56537	-1.76173	-1.66355	0.0981798	-0.159167	-0.30675	-0.232959
68*		S	C10orf139	399706		0.70317	0.628565	0.665867	-0.176612	-1.4125	-1.08527	-1.39009	-1.67268	-1.53138	0.141298	-0.0993742	-0.167527	-0.133451
29*		S	COX6A1	1404		0.581791	0.7501	0.665945	-0.176561	-1.41213	-1.08508	-1.58362	-1.65465	-1.61913	0.0355165	-0.119489	-0.283272	-0.201381
41*		S	NECAB2	54550		0.693508	0.638969	0.666238	-0.17637	-1.41077	-1.08436	-1.63287	-1.65661	-1.64474	0.0118671	-0.268007	-0.148354	-0.208181
11*		S	PDLIM1	9124		0.484418	0.848231	0.666324	-0.176314	-1.41037	-1.08415	-1.69721	-1.57405	-1.63563	0.0615835	-0.256121	-0.183869	-0.219995
33*		S	SLC30A2	7780		0.639846	0.692901	0.666373	-0.176282	-1.41014	-1.08403	-1.76947	-1.71588	-1.74267	0.0267986	-0.329037	-0.145847	-0.237442
24*		S	APEX1	328		0.567811	0.76518	0.666496	-0.176203	-1.40958	-1.08374	-1.71448	-1.42352	-1.569	0.145479	-0.320214	-0.0303769	-0.175295
47*		S	ANKRD55	79722		0.69307	0.640452	0.666761	-0.17603	-1.40834	-1.08309	-1.67143	-1.47358	-1.5725	0.0989241	-0.162011	-0.135073	-0.148542
8*		S	CYSLTR2	57105		0.671634	0.661924	0.666779	-0.176018	-1.40826	-1.08304	-1.5631	-1.63847	-1.60078	0.0376818	-0.16867	-0.234487	-0.201578
68*		S	C8orf59	401466		0.794906	0.538677	0.666791	-0.17601	-1.4082	-1.08301	-1.32652	-1.74883	-1.53768	0.211158	-0.0362824	-0.219293	-0.127787
17*		S	TOP2B	7155		0.746886	0.586738	0.666812	-0.175997	-1.40811	-1.08296	-1.73133	-1.72973	-1.73053	0.000800358	-0.294066	-0.275774	-0.28492
30*		S	KCNJ15	3772		0.551864	0.782758	0.667311	-0.175672	-1.40579	-1.08174	-1.79861	-1.56441	-1.68151	0.117097	-0.406824	-0.088459	-0.247642
69*		S	VSIG6	388078		0.672243	0.662592	0.667417	-0.175602	-1.40529	-1.08148	-1.67175	-1.96542	-1.81858	0.146831	-0.312845	-0.406123	-0.359484
53*		S	ZBTB8	127557		0.750848	0.584069	0.667458	-0.175576	-1.4051	-1.08138	-1.51265	-1.90992	-1.71128	0.198636	-0.178489	-0.366263	-0.272376
32*		S	SLC1A3	6507		0.656462	0.678495	0.667478	-0.175563	-1.40501	-1.08133	-1.67426	-1.77051	-1.72238	0.0481292	-0.285388	-0.283604	-0.284496
63*		S	FLJ41733	400870		0.719696	0.615798	0.667747	-0.175388	-1.40377	-1.08068	-1.64236	-1.82505	-1.73371	0.0913427	-0.219365	-0.346077	-0.282721
21*		S	IL17C	27189		0.558475	0.777026	0.667751	-0.175386	-1.40375	-1.08067	-1.67312	-1.48604	-1.57958	0.0935402	-0.286167	-0.0734434	-0.179805
49*		S	ATAD3B	83858		0.683282	0.65242	0.667851	-0.17532	-1.40328	-1.08042	-1.63252	-1.51888	-1.5757	0.0568215	-0.121155	-0.210082	-0.165619
44*		S	KIAA1328	57536		0.735269	0.600533	0.667901	-0.175288	-1.40305	-1.0803	-1.96222	-1.75698	-1.8596	0.102621	-0.440932	-0.236753	-0.338843
38*		S	PART1	25859		0.596069	0.739864	0.667967	-0.175245	-1.40275	-1.08014	-1.88627	-1.54033	-1.7133	0.172973	-0.353379	-0.119532	-0.236455
66*		S	LOC389151	389151		0.749595	0.586512	0.668053	-0.175189	-1.40234	-1.07993	-1.5187	-1.68783	-1.60327	0.0845694	-0.206979	-0.310116	-0.258548
23*		S	KRT20	54474		0.591586	0.744671	0.668129	-0.17514	-1.402	-1.07974	-1.37184	-1.57544	-1.47364	0.101802	-0.111026	-0.236018	-0.173522
65*		S	IGFBPL1	347252		0.637831	0.69893	0.668381	-0.174976	-1.40083	-1.07913	-1.63102	-1.54076	-1.58589	0.0451313	-0.322651	-0.0669018	-0.194776
25*		S	CGB2	114336		0.576935	0.760153	0.668544	-0.17487	-1.40007	-1.07873	-1.83932	-1.5453	-1.69231	0.147011	-0.405078	-0.203002	-0.30404
41*		S	PIGT	51604		0.663785	0.67334	0.668562	-0.174858	-1.39998	-1.07868	-1.65713	-1.62837	-1.64275	0.014377	-0.289439	-0.129528	-0.209484
52*		S	RASL10B	91608		0.594813	0.74255	0.668682	-0.174781	-1.39943	-1.07839	-1.59381	-1.54078	-1.56729	0.0265111	-0.215642	-0.0770536	-0.146348
32*		S	SPINK2	6691		0.61823	0.720115	0.669172	-0.174462	-1.39716	-1.07719	-1.70478	-1.73589	-1.72034	0.0155575	-0.311646	-0.25772	-0.284683
33*		S	SF3A2	8175		0.56296	0.775701	0.669331	-0.174359	-1.39643	-1.07681	-1.83617	-1.64285	-1.73951	0.0966608	-0.383087	-0.102472	-0.242779
25*		S	CD1C	911		0.762341	0.576675	0.669508	-0.174244	-1.39561	-1.07637	-1.67941	-1.69872	-1.68907	0.00965858	-0.272162	-0.340685	-0.306424
68*		S	NOM1	64434		0.694107	0.645095	0.669601	-0.174184	-1.39518	-1.07614	-1.39637	-1.65868	-1.52752	0.131156	-0.105607	-0.158008	-0.131808
26*		S	GPS1	2873		0.608337	0.731374	0.669856	-0.174019	-1.394	-1.07552	-1.69823	-1.79599	-1.74711	0.0488774	-0.207874	-0.292185	-0.25003
47*		S	EPS8L3	79574		0.68857	0.651381	0.669975	-0.173941	-1.39344	-1.07523	-1.67519	-1.46561	-1.5704	0.104791	-0.164495	-0.128036	-0.146265
36*		S	POLG2	11232		0.759749	0.58023	0.66999	-0.173932	-1.39338	-1.07519	-1.59055	-1.78318	-1.68686	0.0963146	-0.13927	-0.214178	-0.176724
39*		S	EHD4	30844		0.551532	0.788453	0.669992	-0.17393	-1.39337	-1.07519	-2.01266	-1.51968	-1.76617	0.246492	-0.414635	-0.185169	-0.299902
37*		S	DICER1	23405		0.627552	0.712692	0.670122	-0.173846	-1.39277	-1.07487	-1.57777	-1.65933	-1.61855	0.0407796	-0.244793	-0.206234	-0.225514
44*		S	IRGC	56269		0.611587	0.728992	0.670289	-0.173738	-1.39199	-1.07446	-2.09373	-1.65373	-1.87373	0.219998	-0.541495	-0.164823	-0.353159
54*		S	FAM83C	128876		0.722267	0.618432	0.67035	-0.173699	-1.39172	-1.07431	-1.50769	-1.59109	-1.54939	0.0416966	-0.0970539	-0.222526	-0.15979
28*		S	SPIN1	10927		0.675905	0.665348	0.670627	-0.173519	-1.39044	-1.07364	-1.5158	-1.62906	-1.57243	0.0566305	-0.170288	-0.169945	-0.170117
38*		S	DKFZP434B061	26080		0.618102	0.723998	0.67105	-0.173245	-1.38848	-1.0726	-1.86724	-1.55366	-1.71045	0.15679	-0.339489	-0.129746	-0.234617
17*		S	ADH7	131		0.765144	0.577311	0.671227	-0.17313	-1.38766	-1.07217	-1.71491	-1.73716	-1.72603	0.0111246	-0.280885	-0.281594	-0.281239
37*		S	CLCC1	23155		0.784392	0.558144	0.671268	-0.173104	-1.38748	-1.07207	-1.4472	-1.77756	-1.61238	0.165179	-0.123991	-0.29608	-0.210036
12*		S	RASGRP4	115727		0.777017	0.565521	0.671269	-0.173103	-1.38747	-1.07207	-1.52757	-1.56097	-1.54427	0.0167031	-0.315909	-0.119895	-0.217902
45*		S	SPCS3	60559		0.720151	0.622443	0.671297	-0.173085	-1.38734	-1.072	-1.56242	-1.62122	-1.59182	0.0293988	-0.265933	-0.109458	-0.187695
36*		S	CLCA4	22802		0.59646	0.746414	0.671437	-0.172995	-1.3867	-1.07166	-1.72331	-1.64266	-1.68298	0.0403258	-0.236701	-0.125192	-0.180946
25*		S	UBE2S	27338		0.572009	0.770885	0.671447	-0.172988	-1.38665	-1.07163	-1.84357	-1.53633	-1.68995	0.153622	-0.408609	-0.194948	-0.301779
56*		S	CHADL	150356		0.772612	0.570322	0.671467	-0.172975	-1.38656	-1.07158	-1.49176	-1.58536	-1.53856	0.0467973	-0.134862	-0.130073	-0.132468
52*		S	MYOZ3	91977		0.746456	0.596702	0.671579	-0.172903	-1.38604	-1.07131	-1.47842	-1.65054	-1.56448	0.0860612	-0.117809	-0.151732	-0.134771
52*		S	LONRF1	91694		0.725926	0.617319	0.671623	-0.172875	-1.38584	-1.0712	-1.49404	-1.63502	-1.56453	0.0704928	-0.131054	-0.141176	-0.136115
27*		S	PDE6A	5145		0.662751	0.681105	0.671928	-0.172677	-1.38443	-1.07046	-1.51677	-1.67707	-1.59692	0.0801532	-0.0995378	-0.178102	-0.13882
59*		S	LOC283241	283241		0.780055	0.563836	0.671945	-0.172666	-1.38435	-1.07041	-1.40924	-1.77885	-1.59405	0.184809	-0.0979475	-0.361481	-0.229714
40*		S	NDUFAF1	51103		0.786774	0.557238	0.672006	-0.172627	-1.38407	-1.07026	-1.41555	-1.8263	-1.62092	0.205375	-0.0915946	-0.340654	-0.216124
46*		S	PRRG4	79056		0.645093	0.698929	0.672011	-0.172624	-1.38405	-1.07025	-1.55062	-1.52045	-1.53554	0.0150846	-0.0942296	-0.160147	-0.127188
16*		S	TUB	7275		0.558206	0.785944	0.672075	-0.172582	-1.38375	-1.0701	-1.96193	-1.45482	-1.70837	0.253552	-0.468507	-0.121777	-0.295142
40*		S	LOC51057	51057		0.699212	0.644943	0.672077	-0.172581	-1.38374	-1.07009	-1.48444	-1.75004	-1.61724	0.1328	-0.154303	-0.282568	-0.218435
18*		S	ABR	29		0.672311	0.671905	0.672108	-0.172561	-1.3836	-1.07002	-1.82159	-2.02638	-1.92399	0.102396	-0.167156	-0.303296	-0.235226
14*		S	ABHD8	79575		0.72098	0.623373	0.672176	-0.172517	-1.38329	-1.06985	-1.77868	-1.6534	-1.71604	0.0626377	-0.431845	-0.20179	-0.316817
37*		S	KIAA0182	23199		0.605496	0.738867	0.672181	-0.172513	-1.38326	-1.06984	-1.59613	-1.63931	-1.61772	0.0215868	-0.261781	-0.191017	-0.226399
57*		S	OIT3	170392		0.7716	0.573079	0.672339	-0.172411	-1.38253	-1.06945	-1.86952	-1.604	-1.73676	0.132761	-0.33563	-0.26463	-0.30013
37*		S	TRIM35	23087		0.664455	0.680388	0.672422	-0.172358	-1.38216	-1.06925	-1.54705	-1.68404	-1.61555	0.0684968	-0.21637	-0.225014	-0.220692
23*		S	ACTN4	81		0.68312	0.661821	0.67247	-0.172327	-1.38193	-1.06913	-1.30534	-1.64591	-1.47563	0.170282	-0.0400116	-0.300644	-0.170328
32*		S	RPL18A	6142		0.601266	0.744525	0.672895	-0.172052	-1.37997	-1.06809	-1.71832	-1.71559	-1.71695	0.00136666	-0.323297	-0.242539	-0.282918
43*		S	OSGEP	55644		0.793742	0.552109	0.672925	-0.172033	-1.37984	-1.06802	-1.48703	-1.88473	-1.68588	0.198853	-0.0359903	-0.41988	-0.227935
16*		S	APOBEC3G	60489		0.672689	0.673518	0.673103	-0.171918	-1.37902	-1.06758	-1.86184	-1.54303	-1.70244	0.159403	-0.389002	-0.202226	-0.295614
54*		S	TMEM77	128338		0.651992	0.694435	0.673214	-0.171847	-1.37851	-1.06731	-1.56545	-1.53586	-1.55066	0.0147932	-0.141662	-0.174248	-0.157955
37*		S	PHLPPL	23035		0.563021	0.783553	0.673287	-0.1718	-1.37817	-1.06713	-1.63149	-1.60512	-1.61831	0.0131859	-0.294497	-0.165039	-0.229768
12*		S	ETV7	51513		0.530678	0.81595	0.673314	-0.171782	-1.37805	-1.06707	-1.73909	-1.3575	-1.54829	0.190799	-0.555706	0.0303932	-0.262656
39*		S	TINAG	27283		0.610983	0.735854	0.673419	-0.171715	-1.37757	-1.06681	-1.9568	-1.5618	-1.7593	0.197503	-0.37568	-0.223942	-0.299811
17*		S	TUBB	203068		0.632394	0.714542	0.673468	-0.171683	-1.37734	-1.06669	-1.83427	-1.62896	-1.73161	0.102659	-0.376724	-0.196866	-0.286795
32*		S	MRPL23	6150		0.670011	0.67705	0.673531	-0.171643	-1.37705	-1.06654	-1.66344	-1.77172	-1.71758	0.0541386	-0.276082	-0.284503	-0.280292
61*		S	LOC339809	339809		0.690185	0.657189	0.673687	-0.171542	-1.37633	-1.06616	-1.48848	-1.82329	-1.65589	0.167404	-0.241654	-0.387369	-0.314511
66*		S	LOC391692	391692		0.765446	0.581949	0.673697	-0.171535	-1.37628	-1.06613	-1.50539	-1.69125	-1.59832	0.0929288	-0.194171	-0.313109	-0.25364
61*		S	FAM70B	348013		0.702947	0.644494	0.673721	-0.17152	-1.37618	-1.06607	-1.47855	-1.8346	-1.65658	0.178029	-0.231364	-0.396745	-0.314055
39*		S	INTU	27152		0.731233	0.616221	0.673727	-0.171516	-1.37615	-1.06606	-1.84382	-1.6576	-1.75071	0.0931111	-0.296885	-0.312131	-0.304508
62*		S	LCE3A	353142		0.64022	0.707576	0.673898	-0.171406	-1.37536	-1.06564	-1.53064	-1.60296	-1.5668	0.0361599	-0.191163	-0.258767	-0.224965
47*		S	EFTUD1	79631		0.509991	0.837953	0.673972	-0.171358	-1.37502	-1.06546	-1.82454	-1.32953	-1.57704	0.247507	-0.263077	-0.00790012	-0.135489
30*		S	GSTM5	2949		0.753165	0.594864	0.674014	-0.171331	-1.37483	-1.06535	-1.62744	-1.72427	-1.67585	0.0484133	-0.257693	-0.194928	-0.226311
15*		S	MEST	4232		0.774684	0.573385	0.674034	-0.171318	-1.37474	-1.06531	-1.57584	-1.67438	-1.62511	0.0492714	-0.148511	-0.247034	-0.197773
27*		S	IBTK	25998		0.634351	0.713983	0.674167	-0.171233	-1.37413	-1.06498	-1.53975	-1.64302	-1.59139	0.0516371	-0.117084	-0.15452	-0.135802
68*		S	FAM90A6P	389618		0.754877	0.593494	0.674185	-0.171221	-1.37404	-1.06494	-1.35426	-1.70239	-1.52832	0.174069	-0.0638125	-0.187724	-0.125768
59*		S	LOC283587	283587		0.636339	0.712437	0.674388	-0.17109	-1.37311	-1.06444	-1.52466	-1.65868	-1.59167	0.0670091	-0.207994	-0.262773	-0.235383
42*		S	SLC6A15	55117		0.571543	0.777279	0.674411	-0.171075	-1.37301	-1.06439	-1.59404	-1.47289	-1.53346	0.0605745	-0.16378	-0.13756	-0.15067
68*		S	LOC389791	389791		0.779715	0.569154	0.674435	-0.17106	-1.3729	-1.06433	-1.33704	-1.72301	-1.53003	0.192985	-0.0467301	-0.201741	-0.124236
42*		S	SBNO1	55206		0.581199	0.767718	0.674458	-0.171045	-1.37279	-1.06427	-1.58711	-1.48097	-1.53404	0.0530689	-0.158427	-0.144904	-0.151666
49*		S	ZDHHC16	84287		0.661725	0.687348	0.674536	-0.170995	-1.37243	-1.06408	-1.65082	-1.49189	-1.57136	0.079462	-0.132934	-0.183982	-0.158458
59*		S	LOC283214	283214		0.707821	0.641319	0.67457	-0.170973	-1.37228	-1.064	-1.46725	-1.71619	-1.59172	0.124471	-0.153259	-0.310013	-0.231636
31*		S	SLC25A3	5250		0.597249	0.752091	0.67467	-0.170909	-1.37182	-1.06375	-1.98969	-1.45353	-1.72161	0.268084	-0.35931	-0.0984572	-0.228883
42*		S	RIC8B	55188		0.661281	0.688076	0.674678	-0.170903	-1.37178	-1.06373	-1.52965	-1.5483	-1.53897	0.00932608	-0.114035	-0.20608	-0.160058
28*		S	SEC31B	25956		0.598815	0.750769	0.674792	-0.17083	-1.37126	-1.06345	-1.57278	-1.56163	-1.5672	0.00557228	-0.221593	-0.121543	-0.171568
50*		S	MYO18B	84700		0.770807	0.57878	0.674794	-0.170829	-1.37125	-1.06345	-1.34923	-1.75935	-1.55429	0.205061	-0.0254069	-0.302289	-0.163848
31*		S	ADIPOR1	51094		0.758212	0.591375	0.674794	-0.170829	-1.37125	-1.06345	-1.83945	-1.5703	-1.70487	0.134578	-0.261149	-0.199618	-0.230384
44*		S	RGMA	56963		0.64432	0.705324	0.674822	-0.170811	-1.37112	-1.06338	-2.05893	-1.67276	-1.86584	0.193085	-0.51488	-0.178076	-0.346478
59*		S	C12orf40	283461		0.571145	0.778761	0.674953	-0.170726	-1.37052	-1.06306	-1.57702	-1.60504	-1.59103	0.0140106	-0.257915	-0.218717	-0.238316
28*		S	RABL4	11020		0.695366	0.654831	0.675099	-0.170633	-1.36985	-1.0627	-1.50142	-1.63736	-1.56939	0.0679732	-0.157336	-0.175905	-0.16662
57*		S	C1orf65	164127		0.719162	0.631162	0.675162	-0.170592	-1.36956	-1.06255	-1.91777	-1.55918	-1.73847	0.179296	-0.369477	-0.223234	-0.296356
66*		S	LOC401005	401005		0.781619	0.568752	0.675185	-0.170577	-1.36945	-1.06249	-1.49181	-1.70111	-1.59646	0.104651	-0.181102	-0.321766	-0.251434
46*		S	C14orf135	64430		0.687986	0.662511	0.675249	-0.170536	-1.36916	-1.06234	-1.51787	-1.54868	-1.53328	0.0154064	-0.0712279	-0.184751	-0.12799
27*		S	MUC3A	4584		0.7861	0.564439	0.675269	-0.170523	-1.36907	-1.06229	-1.41695	-1.7979	-1.60742	0.190475	-0.0233278	-0.261784	-0.142556
41*		S	KCTD9	54793		0.708884	0.641703	0.675293	-0.170507	-1.36896	-1.06223	-1.62032	-1.65436	-1.63734	0.0170183	-0.25692	-0.146857	-0.201888
43*		S	ENOSF1	55556		0.792425	0.558723	0.675574	-0.170327	-1.36767	-1.06154	-1.48811	-1.87921	-1.68366	0.19555	-0.0367148	-0.415422	-0.226068
40*		S	CRNKL1	51340		0.592195	0.759086	0.67564	-0.170284	-1.36736	-1.06138	-1.56864	-1.6508	-1.60972	0.0410775	-0.230944	-0.206972	-0.218958
30*		S	GOLGA3	2802		0.736527	0.614812	0.67567	-0.170266	-1.36723	-1.06131	-1.64159	-1.70729	-1.67444	0.0328541	-0.270019	-0.183625	-0.226822
54*		S	RNF183	138065		0.789349	0.562151	0.67575	-0.170214	-1.36686	-1.06111	-1.45256	-1.63198	-1.54227	0.0897094	-0.0544728	-0.258276	-0.156374
40*		S	ZNF771	51333		0.67078	0.680821	0.675801	-0.170181	-1.36663	-1.06099	-1.50681	-1.71885	-1.61283	0.106017	-0.174665	-0.258806	-0.216735
64*		S	FRG2C	285299		0.737513	0.614411	0.675962	-0.170078	-1.36589	-1.06059	-1.75274	-1.62981	-1.69127	0.0614613	-0.249593	-0.164856	-0.207225
50*		S	C12orf34	84915		0.662915	0.689257	0.676086	-0.169998	-1.36532	-1.06029	-1.43413	-1.66294	-1.54853	0.114406	-0.101522	-0.226398	-0.16396
43*		S	ST6GALNAC1	55808		0.606056	0.746521	0.676288	-0.169868	-1.36439	-1.0598	-1.64138	-1.72236	-1.68187	0.0404899	-0.139239	-0.288832	-0.214036
27*		S	IFITM2	10581		0.790245	0.562521	0.676383	-0.169807	-1.36396	-1.05956	-1.4136	-1.79989	-1.60674	0.193145	-0.0207669	-0.263159	-0.141963
64*		S	MTX3	345778		0.781663	0.57132	0.676492	-0.169738	-1.36347	-1.0593	-1.70916	-1.66183	-1.6855	0.0236688	-0.218198	-0.188168	-0.203183
27*		S	PDE6C	5146		0.759696	0.593418	0.676557	-0.169696	-1.36317	-1.05914	-1.43832	-1.76789	-1.6031	0.164785	-0.0396413	-0.240998	-0.140319
27*		S	RILPL2	196383		0.58975	0.763429	0.676589	-0.169675	-1.36302	-1.05906	-1.57584	-1.59182	-1.58383	0.00798644	-0.144641	-0.119054	-0.131847
61*		S	BRCTD1	345499		0.730922	0.622294	0.676608	-0.169663	-1.36293	-1.05901	-1.45676	-1.85439	-1.65557	0.198812	-0.208809	-0.413142	-0.310976
54*		S	VPS37A	137492		0.75569	0.597547	0.676619	-0.169656	-1.36288	-1.05899	-1.48022	-1.60626	-1.54324	0.0630187	-0.0758382	-0.235792	-0.155815
69*		S	LOC388163	388163		0.873943	0.479337	0.67664	-0.169642	-1.36279	-1.05894	-1.50832	-2.12949	-1.8189	0.310587	-0.167867	-0.52472	-0.346294
57*		S	GBP6	163351		0.768708	0.58469	0.676699	-0.169604	-1.36252	-1.05879	-1.87218	-1.59504	-1.73361	0.138572	-0.337497	-0.256355	-0.296926
38*		S	BHMT2	23743		0.708107	0.645409	0.676758	-0.169567	-1.36225	-1.05865	-1.78948	-1.61969	-1.70459	0.0848973	-0.282749	-0.180336	-0.231542
46*		S	ZFP106	64397		0.625936	0.727724	0.67683	-0.16952	-1.36192	-1.05847	-1.56525	-1.49813	-1.53169	0.0335586	-0.104503	-0.140693	-0.122598
46*		S	MOSPD3	64598		0.624034	0.729697	0.676866	-0.169498	-1.36175	-1.05838	-1.5667	-1.49661	-1.53166	0.0350494	-0.105523	-0.13936	-0.122441
43*		S	LMBRD1	55788		0.894705	0.459176	0.67694	-0.16945	-1.36141	-1.0582	-1.40399	-1.96235	-1.68317	0.279178	0.0195511	-0.482524	-0.231486
53*		S	CLNK	116449		0.727823	0.626446	0.677134	-0.169325	-1.36052	-1.05773	-1.53173	-1.87304	-1.70239	0.170659	-0.196071	-0.339903	-0.267987
22*		S	HMGA1	3159		0.698097	0.656322	0.67721	-0.169277	-1.36018	-1.05754	-1.52316	-1.89014	-1.70665	0.183488	-0.13178	-0.323327	-0.227553
52*		S	PRRC1	133619		0.770464	0.583968	0.677216	-0.169273	-1.36015	-1.05753	-1.46015	-1.66012	-1.56014	0.0999867	-0.102321	-0.158253	-0.130287
29*		S	AP1B1	280		0.697361	0.657211	0.677286	-0.169228	-1.35983	-1.05736	-1.49438	-1.74134	-1.61786	0.123482	-0.0568954	-0.358826	-0.207861
37*		S	ACSBG1	23205		0.842287	0.512426	0.677357	-0.169183	-1.35951	-1.05718	-1.39901	-1.81254	-1.60577	0.206765	-0.0793993	-0.322658	-0.201029
32*		S	SPRR2B	6701		0.670366	0.685	0.677683	-0.168973	-1.35801	-1.05639	-1.66316	-1.7651	-1.71413	0.0509738	-0.275839	-0.279558	-0.277698
43*		S	LIN7C	55327		0.619741	0.735667	0.677704	-0.16896	-1.35792	-1.05633	-1.63013	-1.73143	-1.68078	0.0506498	-0.131711	-0.296148	-0.21393
29*		S	CRMP1	0		0.69316	0.662311	0.677736	-0.16894	-1.35777	-1.05626	-1.49762	-1.73658	-1.6171	0.11948	-0.0591707	-0.354678	-0.206924
32*		S	SNRPB	6628		0.651893	0.7036	0.677747	-0.168933	-1.35772	-1.05623	-1.6779	-1.74963	-1.71377	0.0358638	-0.288526	-0.267991	-0.278258
33*		S	TSN	7247		0.593435	0.762521	0.677978	-0.168784	-1.35667	-1.05566	-1.80973	-1.65447	-1.7321	0.0776302	-0.361663	-0.109376	-0.23552
28*		S	PXMP2	5827		0.701471	0.654809	0.67814	-0.168681	-1.35593	-1.05527	-1.4969	-1.63738	-1.56714	0.070238	-0.153273	-0.175917	-0.164595
29*		S	DLX1	1745		0.765061	0.591252	0.678157	-0.16867	-1.35585	-1.05523	-1.4421	-1.8029	-1.6225	0.180398	-0.0202285	-0.412476	-0.216352
26*		S	LIFR	3977		0.618605	0.737761	0.678183	-0.168653	-1.35573	-1.05516	-1.68906	-1.79054	-1.7398	0.0507407	-0.201289	-0.288173	-0.244731
46*		S	2024-03-07	64844		0.587493	0.769004	0.678249	-0.168611	-1.35543	-1.055	-1.59461	-1.46614	-1.53037	0.0642348	-0.125118	-0.112804	-0.118961
54*		S	SGSM1	129049		0.750468	0.606101	0.678284	-0.168588	-1.35527	-1.05492	-1.48451	-1.60004	-1.54228	0.0577652	-0.0791529	-0.230359	-0.154756
9*		S	TAS2R8	26538		0.679012	0.677685	0.678349	-0.168547	-1.35497	-1.05476	-1.55769	-1.74799	-1.65284	0.095151	-0.152989	-0.295884	-0.224436
51*		S	HN1L	90861		0.59214	0.764599	0.678369	-0.168534	-1.35488	-1.05471	-1.75991	-1.86366	-1.81178	0.0518762	-0.238172	-0.301659	-0.269915
43*		S	ELAC1	55520		0.72807	0.628745	0.678408	-0.168509	-1.3547	-1.05461	-1.54104	-1.82073	-1.68088	0.139845	-0.0721176	-0.368222	-0.22017
54*		S	C1orf87	127795		0.641312	0.715961	0.678636	-0.168363	-1.35366	-1.05405	-1.57423	-1.52022	-1.54723	0.0270022	-0.148441	-0.160574	-0.154508
49*		S	FYTTD1	84248		0.58479	0.772487	0.678639	-0.168362	-1.35365	-1.05405	-1.7161	-1.42611	-1.57111	0.144998	-0.174971	-0.120362	-0.147666
33*		S	BAT3	7917		0.714687	0.642808	0.678747	-0.168292	-1.35315	-1.05378	-1.70455	-1.76006	-1.7323	0.0277534	-0.276425	-0.172089	-0.224257
70*		S	LOC400685	400685		0.740984	0.616608	0.678796	-0.168261	-1.35293	-1.05367	-1.45542	-1.67984	-1.56763	0.112211	-0.050788	-0.271611	-0.161199
21*		S	CSF2	1437		0.638953	0.718746	0.678849	-0.168226	-1.35269	-1.05353	-1.60707	-1.53366	-1.57037	0.0367027	-0.229139	-0.109027	-0.169083
57*		S	KANK4	163782		0.793842	0.563866	0.678854	-0.168224	-1.35267	-1.05352	-1.84906	-1.61111	-1.73008	0.118974	-0.321274	-0.271196	-0.296235
31*		S	POLR2H	5437		0.716253	0.641619	0.678936	-0.168171	-1.35229	-1.05332	-1.87862	-1.53379	-1.7062	0.172413	-0.286737	-0.167993	-0.227365
25*		S	CLN6	54982		0.793597	0.564479	0.679038	-0.168106	-1.35183	-1.05307	-1.65245	-1.70892	-1.68068	0.0282372	-0.249755	-0.349837	-0.299796
52*		S	TM4SF18	116441		0.661926	0.696153	0.67904	-0.168105	-1.35182	-1.05307	-1.54274	-1.5757	-1.55922	0.0164805	-0.172344	-0.10081	-0.136577
17*		S	GSS	2937		0.797478	0.560718	0.679098	-0.168068	-1.35155	-1.05293	-1.68584	-1.75024	-1.71804	0.0322029	-0.257541	-0.291839	-0.27469
44*		S	PRDM10	56980		0.6293	0.728959	0.67913	-0.168047	-1.35141	-1.05285	-2.0749	-1.65376	-1.86433	0.210568	-0.527093	-0.164842	-0.345967
68*		S	LOC389710	389710		0.642012	0.716313	0.679163	-0.168026	-1.35126	-1.05277	-1.43247	-1.59835	-1.51541	0.0829394	-0.141436	-0.116995	-0.129215
58*		S	ZNRF2	223082		0.62006	0.738266	0.679163	-0.168026	-1.35126	-1.05277	-1.58592	-1.76305	-1.67448	0.0885688	-0.179182	-0.231028	-0.205105
43*		S	DEPDC1B	55789		0.52806	0.830495	0.679277	-0.167953	-1.35073	-1.05249	-1.70553	-1.65223	-1.67888	0.0266497	-0.182146	-0.232227	-0.207187
29*		S	CYP3A4	1084		0.797591	0.56126	0.679426	-0.167858	-1.35006	-1.05213	-1.41699	-1.83089	-1.62394	0.206953	-0.00261001	-0.436871	-0.219741
62*		S	UNQ6469	387772		0.795433	0.563503	0.679468	-0.167831	-1.34987	-1.05202	-1.40377	-1.70957	-1.55667	0.152903	-0.0752844	-0.356516	-0.2159
70*		S	LOC400657	400657		0.745877	0.613068	0.679473	-0.167828	-1.34985	-1.05201	-1.45182	-1.68288	-1.56735	0.115528	-0.0480655	-0.274136	-0.161101
46*		S	NOM1	64434		0.650547	0.708445	0.679496	-0.167813	-1.34974	-1.05195	-1.54646	-1.51308	-1.52977	0.0166901	-0.0913049	-0.153718	-0.122511
65*		S	OR2L3	391192		0.760374	0.598673	0.679523	-0.167796	-1.34961	-1.05189	-1.52736	-1.62475	-1.57605	0.0486964	-0.221733	-0.121534	-0.171633
50*		S	FBF1	85302		0.714137	0.645019	0.679578	-0.167761	-1.34936	-1.05175	-1.39382	-1.70155	-1.54768	0.153862	-0.065386	-0.256787	-0.161086
23*		S	ABCC6	368		0.593676	0.765939	0.679808	-0.167614	-1.34832	-1.05119	-1.37032	-1.55735	-1.46383	0.0935166	-0.109405	-0.219428	-0.164416
58*		S	C10orf25	220979		0.704654	0.655243	0.679948	-0.167524	-1.34768	-1.05085	-1.51174	-1.83306	-1.6724	0.16066	-0.11905	-0.278938	-0.198994
28*		S	SUPT5H	6829		0.601175	0.758807	0.679991	-0.167497	-1.34748	-1.05074	-1.57103	-1.55529	-1.56316	0.0078726	-0.220022	-0.116988	-0.168505
24*		S	PARP1	142		0.633515	0.726486	0.680001	-0.167491	-1.34744	-1.05072	-1.65904	-1.4549	-1.55697	0.102069	-0.272443	-0.0538959	-0.163169
60*		S	C19orf54	284325		0.753363	0.607254	0.680308	-0.167294	-1.34604	-1.04997	-1.50442	-1.61126	-1.55784	0.0534222	-0.0238147	-0.217724	-0.120769
10*		S	FSCN3	29999		0.614662	0.746018	0.68034	-0.167274	-1.34589	-1.04989	-1.63752	-1.70114	-1.66933	0.0318097	-0.205891	-0.260905	-0.233398
40*		S	APIP	51074		0.668335	0.69247	0.680403	-0.167234	-1.34561	-1.04974	-1.50874	-1.70872	-1.60873	0.0999911	-0.176416	-0.251091	-0.213753
24*		S	BBS4	585		0.692131	0.668736	0.680434	-0.167214	-1.34547	-1.04966	-1.60959	-1.50174	-1.55567	0.0539222	-0.229826	-0.0889974	-0.159412
58*		S	FERD3L	222894		0.583462	0.777589	0.680526	-0.167156	-1.34505	-1.04944	-1.61801	-1.72989	-1.67395	0.0559444	-0.205197	-0.208335	-0.206766
34*		S	SLC7A6	9057		0.788352	0.573067	0.680709	-0.167038	-1.34421	-1.04899	-1.74844	-1.66156	-1.705	0.0434396	-0.248076	-0.204189	-0.226132
19*		S	CUL3	8452		0.68685	0.674718	0.680784	-0.166991	-1.34387	-1.0488	-1.65702	-1.56117	-1.60909	0.0479224	-0.186927	-0.158023	-0.172475
65*		S	LOC285984	285984		0.717896	0.643854	0.680875	-0.166933	-1.34346	-1.04858	-1.56329	-1.5869	-1.57509	0.0118039	-0.256715	-0.0969137	-0.176814
51*		S	SHF	90525		0.685503	0.676274	0.680889	-0.166924	-1.3434	-1.04855	-1.67001	-1.95576	-1.81289	0.142873	-0.175421	-0.363596	-0.269508
13*		S	MSX1	4487		0.542092	0.819715	0.680903	-0.166914	-1.34333	-1.04851	-1.86691	-1.51767	-1.69229	0.174617	-0.365705	-0.148251	-0.256978
39*		S	ZDHHC1	29800		0.729764	0.63219	0.680977	-0.166868	-1.34299	-1.04833	-1.8452	-1.64481	-1.745	0.100195	-0.297848	-0.300359	-0.299104
27*		S	NOS3	4846		0.733206	0.628775	0.680991	-0.166859	-1.34293	-1.0483	-1.45975	-1.73127	-1.59551	0.135758	-0.0560078	-0.215637	-0.135822
57*		S	SASS6	163786		0.65789	0.70431	0.6811	-0.166789	-1.34244	-1.04803	-1.97414	-1.50273	-1.73844	0.235707	-0.409025	-0.171102	-0.290064
32*		S	SLC18A1	6570		0.664312	0.69807	0.681191	-0.166731	-1.34202	-1.04781	-1.66799	-1.75423	-1.71111	0.0431211	-0.279997	-0.27143	-0.275713
47*		S	UBA5	79876		0.79003	0.572369	0.681199	-0.166726	-1.34198	-1.04779	-1.59034	-1.52324	-1.55679	0.0335498	-0.108485	-0.178912	-0.143699
36*		S	BTN3A1	11119		0.625895	0.736536	0.681215	-0.166715	-1.34191	-1.04775	-1.69938	-1.65101	-1.67519	0.0241836	-0.219138	-0.130481	-0.17481
61*		S	ZNF546	339327		0.698054	0.664529	0.681292	-0.166667	-1.34156	-1.04756	-1.48236	-1.81675	-1.64955	0.167198	-0.235309	-0.381948	-0.308628
32*		S	QARS	5859		0.567165	0.7955	0.681333	-0.166641	-1.34138	-1.04746	-1.74555	-1.67318	-1.70937	0.0361803	-0.346718	-0.210837	-0.278777
20*		S	SSH1	54434		0.605767	0.7569	0.681334	-0.16664	-1.34137	-1.04746	-1.61902	-1.30412	-1.46157	0.157452	-0.160345	0.00768105	-0.0763321
57*		S	ZNF737	163233		0.611628	0.751051	0.681339	-0.166636	-1.34135	-1.04745	-2.01671	-1.46666	-1.74168	0.275025	-0.438886	-0.13779	-0.288338
8*		S	IL8RB	3579		0.691227	0.671554	0.681391	-0.166604	-1.34111	-1.04732	-1.5463	-1.62982	-1.58806	0.0417624	-0.154808	-0.22841	-0.191609
25*		S	CCNB3	85417		0.750702	0.612265	0.681484	-0.166545	-1.34069	-1.04709	-1.68945	-1.66896	-1.6792	0.0102408	-0.280506	-0.313978	-0.297242
43*		S	PRO2964	55415		0.67462	0.688439	0.68153	-0.166515	-1.34048	-1.04698	-1.585	-1.77087	-1.67793	0.0929386	-0.101521	-0.327984	-0.214752
11*		S	MIZF	25988		0.656377	0.706703	0.68154	-0.166509	-1.34044	-1.04696	-1.54543	-1.69478	-1.6201	0.0746754	-0.135978	-0.284741	-0.210359
9*		S	TAAR9	5777		0.483814	0.879282	0.681548	-0.166504	-1.3404	-1.04694	-1.71151	-1.56785	-1.63968	0.0718328	-0.276718	-0.153406	-0.215062
46*		S	KRI1	65095		0.57948	0.783637	0.681558	-0.166497	-1.34035	-1.04691	-1.60073	-1.4548	-1.52776	0.0729653	-0.129415	-0.102917	-0.116166
21*		S	IL15RA	3601		0.789285	0.573863	0.681574	-0.166487	-1.34028	-1.04687	-1.4837	-1.65207	-1.56789	0.0841866	-0.122612	-0.197488	-0.16005
18*		S	GM2A	2760		0.778253	0.584984	0.681619	-0.166459	-1.34008	-1.04676	-1.69608	-2.12209	-1.90908	0.213008	-0.102273	-0.356872	-0.229572
51*		S	ZIM3	114026		0.73402	0.629391	0.681705	-0.166403	-1.33968	-1.04655	-1.6233	-2.00465	-1.81397	0.190673	-0.142812	-0.396472	-0.269642
37*		S	KIAA0409	23378		0.560143	0.803339	0.681741	-0.166381	-1.33952	-1.04647	-1.63389	-1.58998	-1.61194	0.0219522	-0.296713	-0.153537	-0.225125
62*		S	FLJ43582	389649		0.688406	0.675268	0.681837	-0.166319	-1.33909	-1.04623	-1.49125	-1.62687	-1.55906	0.0678077	-0.155189	-0.280687	-0.217938
8*		S	GPR82	27197		0.669284	0.694513	0.681898	-0.16628	-1.33881	-1.04608	-1.56512	-1.60921	-1.58717	0.0220475	-0.170332	-0.213922	-0.192127
66*		S	RESP18	389075		0.647539	0.716263	0.681901	-0.166279	-1.33879	-1.04607	-1.60437	-1.59082	-1.5976	0.00677639	-0.289447	-0.225001	-0.257224
30*		S	GLUL	2752		0.728	0.636505	0.682253	-0.166055	-1.3372	-1.04521	-1.64884	-1.68884	-1.66884	0.020001	-0.276336	-0.171333	-0.223835
34*		S	VGLL4	9686		0.776951	0.587826	0.682388	-0.165968	-1.33658	-1.04488	-1.758	-1.64997	-1.70398	0.0540159	-0.254991	-0.195562	-0.225277
47*		S	SNRNP25	79622		0.649937	0.715133	0.682535	-0.165875	-1.33592	-1.04452	-1.7075	-1.41911	-1.56331	0.144196	-0.185822	-0.086985	-0.136403
43*		S	RUFY2	55680		0.685433	0.679744	0.682589	-0.165841	-1.33567	-1.04439	-1.5761	-1.77813	-1.67712	0.101016	-0.0955729	-0.333845	-0.214709
26*		S	HIST1H4B	8366		0.632185	0.733154	0.68267	-0.16579	-1.33531	-1.0442	-1.67693	-1.79447	-1.7357	0.0587696	-0.192579	-0.291067	-0.241823
40*		S	HEBP1	50865		0.645436	0.72007	0.682753	-0.165736	-1.33493	-1.04399	-1.52675	-1.68472	-1.60574	0.078984	-0.192815	-0.232812	-0.212813
61*		S	LOC349338	349338		0.655366	0.710216	0.682791	-0.165712	-1.33475	-1.0439	-1.5156	-1.77604	-1.64582	0.130223	-0.269727	-0.348204	-0.308965
50*		S	CYorf15B	84663		0.614065	0.751913	0.682989	-0.165586	-1.33386	-1.04341	-1.47257	-1.60826	-1.54041	0.0678461	-0.135984	-0.183357	-0.159671
47*		S	CCDC121	79635		0.725125	0.641002	0.683064	-0.165539	-1.33352	-1.04323	-1.64462	-1.47318	-1.5589	0.0857202	-0.144315	-0.134719	-0.139517
56*		S	CKAP2L	150468		0.704569	0.66163	0.683099	-0.165516	-1.33336	-1.04314	-1.54713	-1.5124	-1.52976	0.017365	-0.183217	-0.0792593	-0.131238
28*		S	SMYD5	10322		0.726498	0.639884	0.683191	-0.165458	-1.33294	-1.04292	-1.47841	-1.64916	-1.56378	0.0853774	-0.136617	-0.184374	-0.160496
49*		S	RNASEH2C	84153		0.664832	0.70164	0.683236	-0.165429	-1.33274	-1.04281	-1.64818	-1.48085	-1.56452	0.0836652	-0.131236	-0.173302	-0.152269
52*		S	ZNF697	90874		0.67078	0.696046	0.683413	-0.165317	-1.33193	-1.04238	-1.536	-1.57578	-1.55589	0.0198894	-0.166632	-0.100865	-0.133748
70*		S	C17orf98	388381		0.697417	0.669616	0.683516	-0.165251	-1.33147	-1.04212	-1.48744	-1.63432	-1.56088	0.0734424	-0.0750292	-0.23379	-0.15441
15*		S	NAT2	10		0.388659	0.978521	0.68359	-0.165204	-1.33113	-1.04195	-1.93118	-1.36193	-1.64655	0.284624	-0.422246	0.00441976	-0.208913
10*		S	ABTB1	80325		0.615519	0.752021	0.68377	-0.16509	-1.33032	-1.0415	-1.63686	-1.69555	-1.66621	0.0293468	-0.205371	-0.256472	-0.230922
17*		S	RAB28	9364		0.793788	0.574007	0.683898	-0.165009	-1.32974	-1.04119	-1.68915	-1.73976	-1.71446	0.0253049	-0.260205	-0.283634	-0.27192
50*		S	TMEM137	84972		0.71752	0.65033	0.683925	-0.164992	-1.32961	-1.04113	-1.39116	-1.69691	-1.54403	0.152875	-0.0629994	-0.253138	-0.158069
26*		S	HIP1	3092		0.628414	0.739441	0.683928	-0.16499	-1.3296	-1.04112	-1.6803	-1.78911	-1.73471	0.0544054	-0.194997	-0.287117	-0.241057
50*		S	SLITRK2	84631		0.642213	0.725986	0.684099	-0.164881	-1.32882	-1.0407	-1.45042	-1.63088	-1.54065	0.0902339	-0.116126	-0.201168	-0.158647
57*		S	FAM151B	167555		0.720447	0.648112	0.68428	-0.164766	-1.32801	-1.04026	-1.91659	-1.5461	-1.73134	0.185245	-0.368647	-0.211154	-0.289901
64*		S	hCG_1660138	139542		0.625577	0.743228	0.684403	-0.164688	-1.32745	-1.03996	-1.8632	-1.53411	-1.69866	0.164547	-0.329192	-0.0951685	-0.21218
19*		S	PEX10	5192		0.639839	0.72912	0.68448	-0.16464	-1.3271	-1.03977	-1.6973	-1.52106	-1.60918	0.088124	-0.216303	-0.125597	-0.17095
52*		S	FAM114A1	92689		0.801281	0.567812	0.684546	-0.164597	-1.3268	-1.03961	-1.4367	-1.67228	-1.55449	0.11779	-0.0824392	-0.166525	-0.124482
30*		S	HDC	3067		0.618219	0.750889	0.684554	-0.164592	-1.32677	-1.03959	-1.74218	-1.59152	-1.66685	0.0753297	-0.357666	-0.106517	-0.232092
33*		S	ZNF711	7552		0.65032	0.719056	0.684688	-0.164507	-1.32616	-1.03926	-1.76039	-1.69281	-1.7266	0.0337894	-0.321674	-0.132146	-0.22691
39*		S	ZBTB44	29068		0.709814	0.659655	0.684735	-0.164478	-1.32595	-1.03915	-1.86394	-1.62282	-1.74338	0.120564	-0.31092	-0.280113	-0.295517
15*		S	SHH	6469		0.762333	0.607299	0.684816	-0.164426	-1.32558	-1.03895	-1.58721	-1.64823	-1.61772	0.030509	-0.15727	-0.225985	-0.191627
67*		S	LOC401308	401308		0.771832	0.598074	0.684953	-0.164339	-1.32496	-1.03861	-1.53337	-1.93574	-1.73455	0.201183	-0.065852	-0.40813	-0.236991
50*		S	LSM10	84967		0.778281	0.592146	0.685214	-0.164174	-1.32378	-1.03798	-1.34335	-1.74769	-1.54552	0.20217	-0.0201342	-0.293107	-0.156621
66*		S	LOC389233	389233		0.685933	0.684806	0.685369	-0.164075	-1.32308	-1.03759	-1.57214	-1.61434	-1.59324	0.0210998	-0.258422	-0.245636	-0.252029
32*		S	SLC12A4	6560		0.624511	0.746515	0.685513	-0.163984	-1.32243	-1.03724	-1.69976	-1.71393	-1.70685	0.00708445	-0.307332	-0.241301	-0.274317
27*		S	PSTPIP1	9051		0.619202	0.751917	0.685559	-0.163955	-1.32222	-1.03713	-1.55201	-1.60374	-1.57787	0.0258644	-0.126444	-0.127311	-0.126877
17*		S	DHX8	1659		0.594835	0.776357	0.685596	-0.163932	-1.32206	-1.03704	-1.86805	-1.58022	-1.72413	0.143915	-0.40384	-0.1587	-0.28127
58*		S	MAP1D	254042		0.707881	0.663316	0.685598	-0.16393	-1.32204	-1.03703	-1.50891	-1.82626	-1.66758	0.158671	-0.116756	-0.274279	-0.195518
63*		S	OR11H6	122748		0.802138	0.569131	0.685635	-0.163907	-1.32188	-1.03695	-1.56829	-1.86262	-1.71545	0.147166	-0.160194	-0.375295	-0.267744
32*		S	SNRPD2	6633		0.704083	0.667275	0.685679	-0.163879	-1.32168	-1.03684	-1.63624	-1.77985	-1.70804	0.0718049	-0.252681	-0.290582	-0.271632
71*		S	FDPSL3	2227		0.697638	0.673775	0.685706	-0.163862	-1.32156	-1.03677	-1.57332	-1.50794	-1.54063	0.0326919	-0.261509	-0.120849	-0.191179
51*		S	PYGO2	90780		0.600794	0.770909	0.685851	-0.16377	-1.3209	-1.03642	-1.75157	-1.85708	-1.80433	0.0527526	-0.232356	-0.297234	-0.264795
44*		S	GALNTL1	57452		0.730841	0.640983	0.685912	-0.163732	-1.32063	-1.03627	-1.96693	-1.72447	-1.8457	0.12123	-0.444533	-0.214104	-0.329318
22*		S	CHRNA10	57053		0.716301	0.655621	0.685961	-0.163701	-1.32041	-1.03615	-1.50898	-1.8908	-1.69989	0.190911	-0.120269	-0.323783	-0.222026
30*		S	LY6H	4062		0.663449	0.708512	0.68598	-0.163688	-1.32032	-1.0361	-1.70372	-1.62758	-1.66565	0.0380736	-0.324158	-0.13053	-0.227344
24*		S	API5	8539		0.601484	0.77055	0.686017	-0.163665	-1.32015	-1.03601	-1.68607	-1.41917	-1.55262	0.133451	-0.295732	-0.027113	-0.161422
31*		S	NAB1	4664		0.575986	0.796172	0.686079	-0.163626	-1.31987	-1.03586	-2.00954	-1.4215	-1.71552	0.294021	-0.372276	-0.0707108	-0.221494
8*		S	NPFFR2	10886		0.662922	0.709276	0.686099	-0.163613	-1.31978	-1.03581	-1.57057	-1.59596	-1.58327	0.0126933	-0.174833	-0.204605	-0.189719
28*		S	RARRES1	5918		0.65907	0.713171	0.686121	-0.1636	-1.31969	-1.03576	-1.52824	-1.59131	-1.55978	0.0315343	-0.181492	-0.142847	-0.162169
10*		S	ENG	2022		0.610639	0.761608	0.686123	-0.163598	-1.31967	-1.03575	-1.64063	-1.68663	-1.66363	0.0230021	-0.208333	-0.249392	-0.228862
24*		S	BCL2L1	598		0.686847	0.685506	0.686176	-0.163564	-1.31943	-1.03562	-1.61405	-1.48814	-1.55109	0.062952	-0.233668	-0.0788043	-0.156236
58*		S	C7orf51	222950		0.764056	0.608355	0.686206	-0.163546	-1.3193	-1.03555	-1.45966	-1.8726	-1.66613	0.206471	-0.0768255	-0.305996	-0.191411
47*		S	L2HGDH	79944		0.767845	0.604784	0.686315	-0.163477	-1.31881	-1.03528	-1.60889	-1.49959	-1.55424	0.054648	-0.120732	-0.15804	-0.139386
18*		S	SERPINB4	6318		0.640224	0.732527	0.686376	-0.163438	-1.31854	-1.03514	-1.85961	-1.95963	-1.90962	0.0500129	-0.186807	-0.26593	-0.226368
47*		S	PDZD3	79849		0.656051	0.716868	0.68646	-0.163385	-1.31816	-1.03493	-1.70239	-1.41785	-1.56012	0.142272	-0.182447	-0.0858679	-0.134157
42*		S	LRRC20	55222		0.56964	0.803331	0.686485	-0.163369	-1.31804	-1.03487	-1.5954	-1.45086	-1.52313	0.0722693	-0.164835	-0.117549	-0.141192
26*		S	FGGY	55277		0.691313	0.681879	0.686596	-0.163299	-1.31754	-1.0346	-1.62412	-1.83818	-1.73115	0.107034	-0.154655	-0.323279	-0.238967
8*		S	GRM2	2912		0.761429	0.61183	0.68663	-0.163278	-1.31739	-1.03451	-1.48608	-1.68343	-1.58476	0.0986744	-0.105141	-0.2661	-0.18562
52*		S	GBP4	115361		0.807849	0.565516	0.686682	-0.163244	-1.31715	-1.03438	-1.4317	-1.67401	-1.55285	0.121153	-0.0782018	-0.167701	-0.122951
16*		S	TTC4	7268		0.600015	0.773714	0.686864	-0.163129	-1.31633	-1.03394	-1.92537	-1.46442	-1.6949	0.230478	-0.439472	-0.130528	-0.285
59*		S	C11orf47	283294		0.706979	0.666778	0.686878	-0.16312	-1.31627	-1.03391	-1.46793	-1.6956	-1.58176	0.113838	-0.153903	-0.293102	-0.223503
32*		S	SNRNP70	6625		0.67839	0.69561	0.687	-0.163043	-1.31572	-1.03361	-1.65675	-1.75628	-1.70651	0.0497639	-0.270328	-0.27296	-0.271644
8*		S	CCL3	6348		0.750839	0.623209	0.687024	-0.163028	-1.31561	-1.03355	-1.49517	-1.67322	-1.58419	0.0890257	-0.112633	-0.258919	-0.185776
47*		S	RNF122	79845		0.502199	0.871862	0.68703	-0.163024	-1.31558	-1.03353	-1.83106	-1.3048	-1.56793	0.263131	-0.267379	0.0139342	-0.126722
17*		S	TARBP1	6894		0.697056	0.677092	0.687074	-0.162996	-1.31539	-1.03343	-1.77613	-1.65848	-1.71731	0.0588242	-0.330041	-0.219988	-0.275014
53*		S	ASAH3	125981		0.673396	0.700841	0.687118	-0.162968	-1.31518	-1.03332	-1.57683	-1.80831	-1.69257	0.115742	-0.237632	-0.293628	-0.26563
64*		S	LOC133993	133993		0.713074	0.661791	0.687433	-0.16277	-1.31377	-1.03255	-1.77685	-1.59461	-1.68573	0.0911206	-0.266972	-0.139225	-0.203098
69*		S	LOC399933	399933		0.781559	0.593461	0.68751	-0.162721	-1.31342	-1.03236	-1.58317	-2.02731	-1.80524	0.222068	-0.234271	-0.450863	-0.342567
30*		S	GPX7	2882		0.776968	0.598085	0.687527	-0.162711	-1.31335	-1.03232	-1.6072	-1.72153	-1.66436	0.057163	-0.240059	-0.193103	-0.216581
21*		S	GNRH1	2796		0.719301	0.655759	0.68753	-0.162708	-1.31333	-1.03231	-1.54113	-1.58514	-1.56314	0.0220049	-0.172204	-0.147485	-0.159844
39*		S	ZNRD1	30834		0.661573	0.713498	0.687535	-0.162705	-1.31331	-1.0323	-1.90927	-1.5797	-1.74448	0.164785	-0.34253	-0.240422	-0.291476
25*		S	DTNBP1	84062		0.62779	0.747874	0.687832	-0.162518	-1.31197	-1.03157	-1.79546	-1.55557	-1.67551	0.119945	-0.36862	-0.212216	-0.290418
71*		S	FAM129B	64855		0.724897	0.650785	0.687841	-0.162512	-1.31193	-1.03155	-1.54792	-1.52679	-1.53736	0.0105691	-0.237071	-0.136296	-0.186684
52*		S	GGTLC2	91227		0.752226	0.623565	0.687895	-0.162478	-1.31168	-1.03142	-1.47403	-1.63032	-1.55217	0.0781488	-0.114087	-0.137978	-0.126032
69*		S	LOC399920	399920		0.884761	0.491094	0.687928	-0.162457	-1.31154	-1.03134	-1.49955	-2.11896	-1.80926	0.309707	-0.160091	-0.517112	-0.338601
35*		S	NAALADL1	10004		0.70905	0.667124	0.688087	-0.162357	-1.31082	-1.03095	-1.53734	-1.7606	-1.64897	0.111632	-0.117271	-0.467111	-0.292191
53*		S	ZNF491	126069		0.708157	0.668441	0.688299	-0.162223	-1.30987	-1.03043	-1.54802	-1.8365	-1.69226	0.14424	-0.211088	-0.313781	-0.262435
33*		S	B4GALT2	8704		0.687095	0.689635	0.688365	-0.162181	-1.30957	-1.03027	-1.72848	-1.71876	-1.72362	0.00486426	-0.295822	-0.147558	-0.22169
32*		S	UAP1	6675		0.708859	0.667965	0.688412	-0.162152	-1.30936	-1.03016	-1.63242	-1.77927	-1.70585	0.0734243	-0.249401	-0.290153	-0.269777
63*		S	MGC48628	401145		0.783204	0.593765	0.688485	-0.162106	-1.30903	-1.02998	-1.5853	-1.84279	-1.71404	0.128743	-0.173783	-0.359872	-0.266827
30*		S	HLA-F	3134		0.758258	0.618715	0.688487	-0.162105	-1.30902	-1.02997	-1.62311	-1.70397	-1.66354	0.0404328	-0.25392	-0.181413	-0.217667
70*		S	FLJ37644	400618		0.669599	0.707503	0.688551	-0.162064	-1.30873	-1.02982	-1.50789	-1.60179	-1.55484	0.0469536	-0.0905074	-0.206759	-0.148633
31*		S	AGPAT4	56895		0.580424	0.796685	0.688554	-0.162062	-1.30872	-1.02981	-2.0054	-1.42113	-1.71326	0.292136	-0.36957	-0.0703879	-0.219979
38*		S	ZNF500	26048		0.714794	0.662418	0.688606	-0.162029	-1.30849	-1.02968	-1.78371	-1.6054	-1.69455	0.0891548	-0.278533	-0.169386	-0.22396
68*		S	USP17L8	392188		0.564441	0.812773	0.688607	-0.162029	-1.30848	-1.02968	-1.48622	-1.51663	-1.50142	0.0152038	-0.194786	-0.0614447	-0.128115
55*		S	C1orf210	149466		0.743765	0.633644	0.688705	-0.161967	-1.30804	-1.02944	-1.69731	-1.60446	-1.65089	0.0464265	-0.198786	-0.131012	-0.164899
43*		S	THSD1	55901		0.820715	0.556904	0.688809	-0.161901	-1.30757	-1.02918	-1.46485	-1.88073	-1.67279	0.207942	-0.021152	-0.416648	-0.2189
54*		S	EMID1	129080		0.78633	0.591306	0.688818	-0.161896	-1.30753	-1.02916	-1.45504	-1.61079	-1.53292	0.0778772	-0.0563891	-0.239757	-0.148073
34*		S	CEP57	9702		0.673729	0.704273	0.689001	-0.16178	-1.30671	-1.02872	-1.84451	-1.55847	-1.70149	0.143023	-0.317598	-0.127499	-0.222549
63*		S	AADACL4	343066		0.677975	0.700202	0.689088	-0.161725	-1.30632	-1.0285	-1.67985	-1.75709	-1.71847	0.0386222	-0.24931	-0.293231	-0.27127
71*		S	FLJ16171	441116		0.6614	0.716901	0.68915	-0.161686	-1.30604	-1.02835	-1.60708	-1.47258	-1.53983	0.0672523	-0.293997	-0.0918734	-0.192935
62*		S	FLJ45983	399717		0.670145	0.70825	0.689198	-0.161656	-1.30583	-1.02824	-1.50618	-1.60246	-1.55432	0.0481414	-0.168822	-0.25831	-0.213566
62*		S	FLJ44861	388428		0.584573	0.79417	0.689372	-0.161547	-1.30504	-1.02781	-1.57613	-1.53888	-1.55751	0.0186223	-0.232708	-0.200016	-0.216362
38*		S	ZDHHC5	25921		0.767901	0.611609	0.689755	-0.161305	-1.30332	-1.02687	-1.73783	-1.64809	-1.69296	0.0448702	-0.245054	-0.202094	-0.223574
18*		S	ACTL6B	51412		0.629975	0.749599	0.689787	-0.161285	-1.30318	-1.0268	-1.87175	-1.94083	-1.90629	0.0345427	-0.193084	-0.255407	-0.224245
59*		S	KLHL34	257240		0.760227	0.61936	0.689793	-0.161281	-1.30315	-1.02678	-1.42516	-1.73395	-1.57956	0.154395	-0.11313	-0.324599	-0.218865
68*		S	hCG_1984468	389672		0.715106	0.664546	0.689826	-0.16126	-1.303	-1.0267	-1.38182	-1.6422	-1.51201	0.130192	-0.0911652	-0.146806	-0.118986
25*		S	DLEC1	9940		0.811139	0.568525	0.689832	-0.161257	-1.30298	-1.02669	-1.63732	-1.70554	-1.67143	0.0341107	-0.23718	-0.346801	-0.29199
27*		S	ALKBH2	121642		0.64855	0.731367	0.689959	-0.161177	-1.30241	-1.02638	-1.52826	-1.62502	-1.57664	0.0483804	-0.108312	-0.142051	-0.125181
8*		S	GLP2R	9340		0.705636	0.674333	0.689985	-0.161161	-1.30229	-1.02631	-1.53394	-1.62733	-1.58063	0.0466946	-0.144614	-0.226656	-0.185635
51*		S	UNC5A	90249		0.674572	0.705416	0.689994	-0.161155	-1.30225	-1.02629	-1.68054	-1.92537	-1.80295	0.122417	-0.182768	-0.34316	-0.262964
20*		S	NPC1	4864		0.577178	0.802895	0.690037	-0.161128	-1.30206	-1.02619	-1.64213	-1.27202	-1.45707	0.185056	-0.177278	0.0376972	-0.0697902
45*		S	IL21	59067		0.643847	0.736255	0.690051	-0.161119	-1.30199	-1.02615	-1.62211	-1.5214	-1.57175	0.0503565	-0.324929	-0.0458548	-0.185392
48*		S	TRIM7	81786		0.707081	0.673505	0.690293	-0.160967	-1.30091	-1.02556	-1.59718	-1.78599	-1.69158	0.0944075	-0.209282	-0.455358	-0.33232
17*		S	SCD	6319		0.722496	0.658299	0.690397	-0.160901	-1.30044	-1.0253	-1.75326	-1.6733	-1.71328	0.0399779	-0.311674	-0.231591	-0.271633
21*		S	BMP3	651		0.80795	0.572916	0.690433	-0.160878	-1.30028	-1.02522	-1.46838	-1.65285	-1.56061	0.0922324	-0.109386	-0.198066	-0.153726
44*		S	ODZ2	57451		0.719422	0.661694	0.690558	-0.1608	-1.29972	-1.02491	-1.97907	-1.70782	-1.84345	0.135624	-0.453817	-0.202506	-0.328162
52*		S	ZNF526	116115		0.71788	0.663438	0.690659	-0.160736	-1.29927	-1.02466	-1.50016	-1.60032	-1.55024	0.0500785	-0.136245	-0.117561	-0.126903
12*		S	HSP90AA1	3320		0.606268	0.775132	0.6907	-0.160711	-1.29908	-1.02456	-1.67419	-1.39066	-1.53242	0.141763	-0.482123	0.00589741	-0.238113
31*		S	ACCN4	55515		0.623062	0.758787	0.690925	-0.160569	-1.29807	-1.02401	-1.9656	-1.44866	-1.70713	0.258469	-0.343568	-0.0942424	-0.218905
68*		S	LOC401520	401520		0.783722	0.598226	0.690974	-0.160538	-1.29785	-1.02389	-1.33427	-1.69838	-1.51633	0.182059	-0.0439743	-0.184999	-0.114487
53*		S	WHDC1	123720		0.698348	0.684082	0.691215	-0.160387	-1.29677	-1.0233	-1.55615	-1.82289	-1.68952	0.133371	-0.218579	-0.304052	-0.261315
46*		S	DDRGK1	65992		0.673036	0.709496	0.691266	-0.160355	-1.29654	-1.02318	-1.52929	-1.51226	-1.52077	0.00851087	-0.079245	-0.153008	-0.116126
35*		S	COLEC10	10584		0.811966	0.57065	0.691308	-0.160328	-1.29636	-1.02308	-1.45881	-1.85131	-1.65506	0.196248	-0.0570794	-0.556926	-0.307003
21*		S	CYFIP2	26999		0.749994	0.632627	0.691311	-0.160327	-1.29634	-1.02307	-1.51594	-1.60405	-1.55999	0.0440516	-0.150454	-0.161609	-0.156031
68*		S	LOC389749	389749		0.6136	0.769127	0.691364	-0.160294	-1.29611	-1.02294	-1.45215	-1.5536	-1.50288	0.0507241	-0.160976	-0.0865797	-0.123778
61*		S	C9orf164	349236		0.732023	0.650796	0.69141	-0.160265	-1.2959	-1.02283	-1.45591	-1.82899	-1.64245	0.186542	-0.207922	-0.39209	-0.300006
54*		S	PACRG	135138		0.792254	0.590611	0.691433	-0.16025	-1.2958	-1.02277	-1.45017	-1.6113	-1.53074	0.0805641	-0.0526288	-0.240198	-0.146413
23*		S	KRT75	9119		0.803811	0.579116	0.691464	-0.160231	-1.29566	-1.0227	-1.21767	-1.71625	-1.46696	0.249291	0.0536235	-0.365157	-0.155767
58*		S	ZSCAN23	222696		0.726419	0.656538	0.691478	-0.160221	-1.29559	-1.02266	-1.49266	-1.83197	-1.66232	0.169656	-0.103579	-0.278191	-0.190885
36*		S	RNF24	11237		0.802049	0.581172	0.691611	-0.160138	-1.295	-1.02234	-1.55616	-1.78238	-1.66927	0.113112	-0.114031	-0.213673	-0.163852
16*		S	ADAMTS15	170689		0.660925	0.722408	0.691666	-0.160103	-1.29475	-1.0222	-1.87213	-1.50467	-1.6884	0.183726	-0.397172	-0.167242	-0.282207
12*		S	ARL2	402		0.776278	0.607444	0.691861	-0.159981	-1.29388	-1.02172	-1.5282	-1.52691	-1.52756	0.000645788	-0.316628	-0.0947361	-0.205682
51*		S	SYT8	90019		0.669198	0.714728	0.691963	-0.159917	-1.29342	-1.02148	-1.68571	-1.91566	-1.80069	0.114975	-0.18638	-0.33663	-0.261505
37*		S	HIC2	23119		0.579349	0.804584	0.691967	-0.159915	-1.29341	-1.02147	-1.6179	-1.58903	-1.60347	0.014434	-0.28192	-0.152813	-0.217367
54*		S	NUDT16	131870		0.728388	0.655858	0.692123	-0.159817	-1.29271	-1.02108	-1.50266	-1.56389	-1.53328	0.0306155	-0.0931685	-0.198752	-0.14596
29*		S	CA6	722		0.750935	0.633347	0.692141	-0.159805	-1.29263	-1.02104	-1.45301	-1.76361	-1.60831	0.155302	-0.0278793	-0.378237	-0.203058
15*		S	PSMB4	5692		0.618585	0.765851	0.692218	-0.159757	-1.29228	-1.02085	-1.71953	-1.52595	-1.62274	0.0967915	-0.259203	-0.127577	-0.19339
71*		S	OR4K2	390431		0.762365	0.622191	0.692278	-0.159719	-1.29201	-1.02071	-1.51302	-1.55023	-1.53162	0.0186067	-0.203481	-0.155508	-0.179494
44*		S	ZNF287	57336		0.731863	0.65272	0.692291	-0.159711	-1.29195	-1.02067	-1.96584	-1.71504	-1.84044	0.125404	-0.443702	-0.207531	-0.325616
27*		S	PPRC1	23082		0.776491	0.608302	0.692396	-0.159645	-1.29148	-1.02042	-1.42473	-1.75247	-1.5886	0.163873	-0.0292646	-0.230322	-0.129793
58*		S	POLR1C	219404		0.760999	0.623878	0.692438	-0.159619	-1.29129	-1.02031	-1.46234	-1.85951	-1.66093	0.198586	-0.0789985	-0.297038	-0.188018
44*		S	BBX	56987		0.793011	0.592053	0.692532	-0.15956	-1.29088	-1.02008	-1.90082	-1.76379	-1.83231	0.0685149	-0.393984	-0.241502	-0.317743
35*		S	ACOT8	10005		0.728676	0.657495	0.693086	-0.159213	-1.2884	-1.01873	-1.52237	-1.76966	-1.64601	0.123646	-0.105793	-0.476075	-0.290934
24*		S	UCP2	7351		0.61495	0.771228	0.693089	-0.159211	-1.28839	-1.01872	-1.67471	-1.41862	-1.54666	0.128045	-0.285941	-0.0267009	-0.156321
37*		S	RAD54L2	23132		0.879229	0.506989	0.693109	-0.159198	-1.2883	-1.01867	-1.36825	-1.8167	-1.59247	0.224222	-0.0509457	-0.325819	-0.188382
61*		S	WDR53	348793		0.628931	0.757323	0.693127	-0.159187	-1.28822	-1.01863	-1.53618	-1.73407	-1.63513	0.0989432	-0.29104	-0.313411	-0.302226
48*		S	C4orf29	80167		0.643011	0.743296	0.693153	-0.159171	-1.2881	-1.01856	-1.65171	-1.7266	-1.68916	0.037448	-0.25532	-0.398871	-0.327095
43*		S	IQWD1	55827		0.878751	0.50765	0.6932	-0.159141	-1.28789	-1.01845	-1.41712	-1.92187	-1.66949	0.252375	0.0107746	-0.449849	-0.219537
11*		S	NCBP1	4686		0.780634	0.605894	0.693264	-0.159101	-1.2876	-1.01829	-1.43574	-1.78077	-1.60826	0.172514	-0.0491634	-0.35659	-0.202877
22*		S	NOTCH1	4851		0.682771	0.703902	0.693337	-0.159056	-1.28728	-1.01812	-1.5351	-1.8449	-1.69	0.154902	-0.141471	-0.292354	-0.216913
40*		S	RNF141	50862		0.631884	0.755056	0.69347	-0.158972	-1.28668	-1.01779	-1.53742	-1.6543	-1.59586	0.0584431	-0.20252	-0.209641	-0.206081
53*		S	C19orf39	126074		0.711249	0.675794	0.693522	-0.15894	-1.28645	-1.01767	-1.54546	-1.8301	-1.68778	0.142322	-0.208727	-0.309208	-0.258967
30*		S	EIF5A	1984		0.605801	0.781831	0.693816	-0.158756	-1.28514	-1.01695	-1.75274	-1.5652	-1.65897	0.0937714	-0.366866	-0.0889842	-0.227925
52*		S	YTHDC1	91746		0.736575	0.651543	0.694059	-0.158604	-1.28405	-1.01635	-1.48594	-1.60927	-1.5476	0.0616669	-0.124184	-0.123652	-0.123918
21*		S	ITGA4	3676		0.592434	0.795747	0.694091	-0.158584	-1.28391	-1.01627	-1.64525	-1.47074	-1.55799	0.0872558	-0.262103	-0.0620129	-0.162058
30*		S	KRT85	3891		0.711719	0.676493	0.694106	-0.158574	-1.28384	-1.01624	-1.66268	-1.65482	-1.65875	0.00393119	-0.288398	-0.148674	-0.218536
30*		S	MT1E	4493		0.660495	0.727756	0.694125	-0.158562	-1.28376	-1.01619	-1.70624	-1.61121	-1.65872	0.0475156	-0.326347	-0.119626	-0.222986
64*		S	LOC284417	284417		0.689629	0.698641	0.694135	-0.158556	-1.28372	-1.01617	-1.79999	-1.56724	-1.68361	0.116378	-0.283644	-0.119289	-0.201467
54*		S	AMDHD1	144193		0.785577	0.602763	0.69417	-0.158534	-1.28356	-1.01608	-1.45566	-1.60247	-1.52906	0.0734055	-0.0568671	-0.232479	-0.144673
67*		S	LOC402318	402318		0.677219	0.711595	0.694407	-0.158386	-1.2825	-1.0155	-1.60642	-1.83091	-1.71866	0.112246	-0.113877	-0.330168	-0.222022
16*		S	TPT1	7178		0.639956	0.748916	0.694436	-0.158368	-1.28237	-1.01543	-1.89046	-1.48388	-1.68717	0.203291	-0.411734	-0.148273	-0.280004
36*		S	UGT2B11	10720		0.605837	0.78328	0.694558	-0.158291	-1.28183	-1.01513	-1.71569	-1.61148	-1.66359	0.0521003	-0.231106	-0.105451	-0.168279
26*		S	SAP30L	79685		0.757263	0.631956	0.694609	-0.158259	-1.2816	-1.01501	-1.56521	-1.88075	-1.72298	0.157768	-0.112356	-0.354642	-0.233499
60*		S	RAR2	286526		0.808928	0.580332	0.69463	-0.158246	-1.28151	-1.01496	-1.45966	-1.63182	-1.54574	0.086078	0.00327693	-0.234943	-0.115833
43*		S	USE1	55850		0.748303	0.641379	0.694841	-0.158115	-1.28057	-1.01444	-1.5244	-1.81018	-1.66729	0.142889	-0.060987	-0.359706	-0.210346
26*		S	FRAT2	23401		0.596713	0.793062	0.694887	-0.158086	-1.28036	-1.01433	-1.70862	-1.7434	-1.72601	0.0173906	-0.21533	-0.253431	-0.23438
55*		S	ANKRD35	148741		0.808338	0.581643	0.69499	-0.158021	-1.2799	-1.01407	-1.64227	-1.65118	-1.64672	0.00445086	-0.160149	-0.163246	-0.161697
61*		S	NMNAT3	349565		0.809388	0.580776	0.695082	-0.157964	-1.27949	-1.01385	-1.39566	-1.89138	-1.64352	0.247859	-0.145546	-0.443806	-0.294676
38*		S	METTL7A	25840		0.66747	0.723039	0.695254	-0.157856	-1.27872	-1.01343	-1.82459	-1.55446	-1.68953	0.135064	-0.308367	-0.130363	-0.219365
58*		S	SLC16A9	220963		0.582557	0.80816	0.695358	-0.157791	-1.27826	-1.01317	-1.6188	-1.70412	-1.66146	0.042658	-0.20584	-0.190694	-0.198267
43*		S	BCAS4	55653		0.703493	0.687286	0.695389	-0.157772	-1.27812	-1.0131	-1.56125	-1.77184	-1.66654	0.105293	-0.0856378	-0.328761	-0.207199
20*		S	PTPRZ1	5803		0.726971	0.663854	0.695412	-0.157758	-1.27802	-1.01304	-1.52107	-1.36906	-1.44507	0.076002	-0.0885594	-0.0530403	-0.0707999
41*		S	TBC1D13	54662		0.768775	0.622186	0.69548	-0.157715	-1.27772	-1.01288	-1.57145	-1.67039	-1.62092	0.0494716	-0.213736	-0.157547	-0.185641
54*		S	CCDC127	133957		0.73369	0.657337	0.695514	-0.157694	-1.27757	-1.0128	-1.4983	-1.56282	-1.53056	0.032257	-0.089803	-0.197813	-0.143808
67*		S	LOC389321	389321		0.830909	0.560148	0.695528	-0.157685	-1.2775	-1.01276	-1.48776	-1.97076	-1.72926	0.241499	-0.0358652	-0.434177	-0.235021
41*		S	CCDC76	54482		0.698556	0.692506	0.695531	-0.157684	-1.27749	-1.01275	-1.62875	-1.61263	-1.62069	0.00806048	-0.264367	-0.119031	-0.191699
22*		S	GABRA6	2559		0.757089	0.634031	0.69556	-0.157665	-1.27736	-1.01268	-1.47721	-1.91133	-1.69427	0.217059	-0.0944776	-0.337837	-0.216157
59*		S	SUNC1	256979		0.632534	0.758825	0.69568	-0.157591	-1.27683	-1.01239	-1.52771	-1.62116	-1.57444	0.0467233	-0.210908	-0.231959	-0.221434
32*		S	SSBP1	6742		0.575298	0.816065	0.695681	-0.15759	-1.27682	-1.01238	-1.73905	-1.65608	-1.69757	0.0414872	-0.341132	-0.198047	-0.269589
34*		S	RIMS3	9783		0.681044	0.710356	0.6957	-0.157578	-1.27674	-1.01234	-1.83838	-1.55369	-1.69603	0.142347	-0.313161	-0.123944	-0.218553
41*		S	UGT1A5	54579		0.623337	0.76854	0.695939	-0.157429	-1.27568	-1.01176	-1.69014	-1.55018	-1.62016	0.0699795	-0.318604	-0.0773849	-0.197994
43*		S	C20orf24	55969		0.825127	0.566791	0.695959	-0.157416	-1.27559	-1.01171	-1.46122	-1.87247	-1.66684	0.205628	-0.0187249	-0.409983	-0.214354
57*		S	GPR125	166647		0.744266	0.647714	0.69599	-0.157397	-1.27545	-1.01163	-1.89467	-1.5464	-1.72054	0.174134	-0.353273	-0.211438	-0.282355
55*		S	FLJ25328	148231		0.622204	0.770009	0.696106	-0.157324	-1.27493	-1.01135	-1.80093	-1.48196	-1.64145	0.159484	-0.271523	-0.0464831	-0.159003
42*		S	MRPL20	55052		0.664994	0.727286	0.69614	-0.157303	-1.27478	-1.01126	-1.52698	-1.51515	-1.52107	0.00591576	-0.111976	-0.175962	-0.143969
48*		S	STMN4	81551		0.782636	0.609949	0.696292	-0.157208	-1.2741	-1.01089	-1.53287	-1.84007	-1.68647	0.153602	-0.154993	-0.5068	-0.330896
41*		S	C7orf28A	51622		0.660751	0.732099	0.696425	-0.157126	-1.27351	-1.01057	-1.6596	-1.58011	-1.61986	0.039747	-0.291626	-0.0973445	-0.194485
58*		S	UNQ9391	203074		0.770592	0.62236	0.696476	-0.157094	-1.27329	-1.01044	-1.45393	-1.86079	-1.65736	0.203432	-0.0721795	-0.297914	-0.185047
16*		S	EXO1	9156		0.630511	0.762634	0.696573	-0.157034	-1.27286	-1.01021	-1.89871	-1.47311	-1.68591	0.212801	-0.418293	-0.138457	-0.278375
60*		S	FLJ34503	285759		0.597871	0.795561	0.696716	-0.156944	-1.27222	-1.00986	-1.62965	-1.46746	-1.54856	0.0810943	-0.0996272	-0.0972869	-0.0984571
52*		S	FBXO17	115290		0.803797	0.58965	0.696724	-0.15694	-1.27219	-1.00984	-1.43478	-1.65585	-1.54532	0.110531	-0.080816	-0.155343	-0.11808
42*		S	ZNF532	55205		0.742718	0.650838	0.696778	-0.156906	-1.27194	-1.0097	-1.47121	-1.57978	-1.5255	0.0542831	-0.068891	-0.234684	-0.151788
70*		S	LOC388477	388477		0.766425	0.627146	0.696785	-0.156901	-1.27191	-1.00969	-1.43672	-1.67079	-1.55376	0.117035	-0.0366324	-0.264092	-0.150362
40*		S	RNF138	51444		0.70676	0.686838	0.696799	-0.156892	-1.27185	-1.00965	-1.4785	-1.71361	-1.59606	0.117556	-0.148897	-0.254821	-0.201859
61*		S	SLC35D3	340146		0.779358	0.614293	0.696825	-0.156876	-1.27173	-1.00959	-1.41905	-1.86152	-1.64028	0.221235	-0.169758	-0.419051	-0.294404
52*		S	PTH2	113091		0.762528	0.631263	0.696896	-0.156832	-1.27142	-1.00942	-1.46619	-1.62453	-1.54536	0.0791717	-0.107441	-0.134036	-0.120738
47*		S	CCDC48	79825		0.825591	0.568352	0.696971	-0.156785	-1.27108	-1.00923	-1.56059	-1.52617	-1.54338	0.0172143	-0.0888542	-0.181499	-0.135176
58*		S	TIGIT	201633		0.727296	0.666949	0.697122	-0.156691	-1.27041	-1.00886	-1.49189	-1.82319	-1.65754	0.165651	-0.102955	-0.272183	-0.187569
45*		S	PLEKHA4	57664		0.712276	0.682396	0.697336	-0.156558	-1.26946	-1.00834	-1.56858	-1.56863	-1.56861	2.77e-05	-0.272022	-0.0759535	-0.173988
22*		S	PVRL1	5818		0.649624	0.745078	0.697351	-0.156549	-1.2694	-1.0083	-1.56092	-1.80576	-1.68334	0.122419	-0.162431	-0.26555	-0.213991
12*		S	FOSL2	2355		0.53571	0.859056	0.697383	-0.156529	-1.26926	-1.00822	-1.73477	-1.32247	-1.52862	0.206151	-0.550807	0.0562622	-0.247273
49*		S	CEP78	84131		0.744001	0.650807	0.697404	-0.156516	-1.26916	-1.00817	-1.581	-1.52013	-1.55056	0.0304354	-0.0879792	-0.211287	-0.149633
35*		S	ZNF211	10520		0.803137	0.5918	0.697469	-0.156475	-1.26888	-1.00802	-1.46555	-1.83142	-1.64849	0.182937	-0.0622432	-0.537236	-0.29974
70*		S	FLJ34515	400550		0.719265	0.675773	0.697519	-0.156444	-1.26865	-1.00789	-1.47138	-1.62904	-1.55021	0.0788278	-0.0628727	-0.229398	-0.146135
29*		S	C11orf10	746		0.793557	0.601709	0.697633	-0.156373	-1.26814	-1.00761	-1.4201	-1.79314	-1.60662	0.186521	-0.00479486	-0.403971	-0.204383
21*		S	EREG	2069		0.738822	0.656579	0.6977	-0.156331	-1.26785	-1.00745	-1.52511	-1.58447	-1.55479	0.0296799	-0.158371	-0.146984	-0.152678
34*		S	DHRS3	9249		0.795847	0.59975	0.697798	-0.15627	-1.26741	-1.00721	-1.74216	-1.6406	-1.69138	0.0507819	-0.24353	-0.188593	-0.216061
21*		S	FRZB	2487		0.652703	0.743742	0.698222	-0.156006	-1.26553	-1.00617	-1.59579	-1.51324	-1.55451	0.0412748	-0.219396	-0.0937655	-0.156581
36*		S	BTN2A1	11120		0.756305	0.640163	0.698234	-0.155999	-1.26548	-1.00614	-1.59335	-1.7325	-1.66292	0.0695757	-0.141325	-0.182086	-0.161705
50*		S	RBM17	84991		0.692272	0.704486	0.698379	-0.155909	-1.26483	-1.00579	-1.41103	-1.64965	-1.53034	0.119311	-0.0808112	-0.215937	-0.148374
56*		S	DNAJB7	150353		0.627726	0.769141	0.698434	-0.155875	-1.26459	-1.00566	-1.60966	-1.4265	-1.51808	0.091581	-0.237825	-0.0194288	-0.128627
29*		S	DSIPI	1737		0.723627	0.67326	0.698443	-0.155869	-1.26455	-1.00563	-1.4741	-1.72636	-1.60023	0.126133	-0.0426695	-0.345772	-0.194221
40*		S	PAIP2	51247		0.806765	0.590139	0.698452	-0.155863	-1.26451	-1.00561	-1.39982	-1.79769	-1.59876	0.198936	-0.0772779	-0.318864	-0.198071
48*		S	CLPB	81570		0.796271	0.600855	0.698563	-0.155794	-1.26402	-1.00534	-1.52127	-1.84781	-1.68454	0.163274	-0.145195	-0.51416	-0.329678
21*		S	ITGB3BP	23421		0.821385	0.575893	0.698639	-0.155747	-1.26368	-1.00515	-1.45736	-1.65041	-1.55388	0.0965287	-0.0998659	-0.196249	-0.148057
55*		S	ZNF597	146434		0.640201	0.757237	0.698719	-0.155697	-1.26333	-1.00496	-1.78559	-1.49344	-1.63951	0.146078	-0.260754	-0.0544001	-0.157577
44*		S	NLGN4X	57502		0.692927	0.70454	0.698734	-0.155688	-1.26326	-1.00492	-2.00724	-1.67339	-1.84031	0.166928	-0.475359	-0.178515	-0.326937
63*		S	HIST1H2AM	8336		0.713156	0.684397	0.698777	-0.155662	-1.26307	-1.00482	-1.64824	-1.76982	-1.70903	0.0607898	-0.224059	-0.303126	-0.263593
61*		S	ARL16	339231		0.687925	0.70973	0.698828	-0.15563	-1.26285	-1.00469	-1.49024	-1.77648	-1.63336	0.143116	-0.243476	-0.348563	-0.296019
17*		S	OGT	8473		0.612966	0.784928	0.698947	-0.155556	-1.26232	-1.0044	-1.85174	-1.57346	-1.7126	0.139143	-0.39075	-0.153408	-0.272079
8*		S	ICF45	54974		0.766666	0.631328	0.698997	-0.155525	-1.26209	-1.00428	-1.48159	-1.66593	-1.57376	0.0921694	-0.101436	-0.253795	-0.177615
59*		S	TMEM146	257062		0.804875	0.593254	0.699064	-0.155483	-1.2618	-1.00411	-1.3893	-1.75506	-1.57218	0.18288	-0.0789422	-0.34194	-0.210441
58*		S	ZNF25	219749		0.794593	0.603605	0.699099	-0.155461	-1.26164	-1.00403	-1.43288	-1.87661	-1.65475	0.221862	-0.0551189	-0.308737	-0.181928
29*		S	CSN2	1937		0.646774	0.751551	0.699163	-0.155422	-1.26136	-1.00387	-1.53344	-1.6533	-1.59337	0.0599282	-0.0842938	-0.282092	-0.183193
22*		S	TNFRSF12A	51330		0.757217	0.641148	0.699183	-0.155409	-1.26127	-1.00383	-1.47711	-1.90456	-1.69084	0.213726	-0.0943966	-0.333204	-0.213801
42*		S	C11orf57	55216		0.615863	0.78256	0.699211	-0.155391	-1.26114	-1.00375	-1.56224	-1.46842	-1.51533	0.0469063	-0.139212	-0.133504	-0.136358
22*		S	CRYAB	1410		0.797494	0.601014	0.699254	-0.155365	-1.26096	-1.00365	-1.44573	-1.94272	-1.69423	0.248491	-0.0689281	-0.35933	-0.214129
51*		S	LACRT	90070		0.627515	0.771081	0.699298	-0.155338	-1.26076	-1.00354	-1.72585	-1.8569	-1.79137	0.065527	-0.214396	-0.297113	-0.255755
21*		S	ITGA10	8515		0.68445	0.714196	0.699323	-0.155322	-1.26065	-1.00348	-1.56973	-1.53738	-1.55356	0.0161746	-0.196899	-0.111805	-0.154352
20*		S	PROCR	10544		0.636967	0.761712	0.69934	-0.155312	-1.26058	-1.00344	-1.59381	-1.30076	-1.44728	0.146523	-0.141866	0.0108213	-0.0655225
27*		S	PFN1	5216		0.590481	0.808423	0.699452	-0.155242	-1.26008	-1.00317	-1.57525	-1.54522	-1.56023	0.0150168	-0.144189	-0.0867806	-0.115485
22*		S	TNFSF13	8741		0.608552	0.790868	0.69971	-0.155082	-1.25894	-1.00254	-1.59291	-1.76222	-1.67757	0.0846564	-0.188402	-0.235742	-0.212072
29*		S	EGFL4	1774		0.815017	0.584812	0.699914	-0.154955	-1.25803	-1.00204	-1.40353	-1.80891	-1.60622	0.202691	0.00682806	-0.417714	-0.205443
18*		S	MADD	8567		0.747803	0.652135	0.699969	-0.154921	-1.25779	-1.0019	-1.73215	-2.04815	-1.89015	0.158	-0.120922	-0.315481	-0.218202
71*		S	ASB18	401036		0.755364	0.644601	0.699982	-0.154913	-1.25773	-1.00187	-1.51954	-1.53186	-1.5257	0.00615824	-0.209757	-0.140451	-0.175104
33*		S	VDAC3	7419		0.595421	0.804579	0.7	-0.154902	-1.25765	-1.00183	-1.80801	-1.61738	-1.7127	0.0953155	-0.360267	-0.0873437	-0.223805
28*		S	SFTPA1B	6435		0.769913	0.630349	0.700131	-0.154821	-1.25707	-1.00151	-1.44632	-1.65669	-1.5515	0.105185	-0.107723	-0.189777	-0.14875
71*		S	OR4K5	79317		0.669807	0.730748	0.700277	-0.15473	-1.25643	-1.00115	-1.59925	-1.46122	-1.53024	0.0690129	-0.28646	-0.0825698	-0.184515
46*		S	APOO	79135		0.693303	0.707346	0.700325	-0.154701	-1.25622	-1.00103	-1.51381	-1.51393	-1.51387	6.06e-05	-0.0683766	-0.15446	-0.111418
43*		S	SLC35E3	55508		0.801012	0.599656	0.700334	-0.154695	-1.25618	-1.00101	-1.48105	-1.84502	-1.66304	0.181987	-0.0319909	-0.38783	-0.20991
24*		S	C1orf2	10712		0.703398	0.697346	0.700372	-0.154671	-1.25601	-1.00092	-1.60008	-1.47854	-1.53931	0.0607712	-0.221634	-0.0716077	-0.146621
36*		S	C9orf7	11094		0.79552	0.605305	0.700412	-0.154646	-1.25583	-1.00082	-1.56147	-1.76198	-1.66172	0.100255	-0.117927	-0.200751	-0.159339
57*		S	HTR3D	200909		0.742626	0.658423	0.700524	-0.154577	-1.25533	-1.00054	-1.89618	-1.53814	-1.71716	0.17902	-0.354332	-0.203806	-0.279069
17*		S	TAT	6898		0.784212	0.617279	0.700746	-0.15444	-1.25436	-1	-1.69777	-1.70565	-1.70171	0.00394008	-0.267118	-0.256917	-0.262018
52*		S	ZNF251	90987		0.697757	0.704118	0.700937	-0.154321	-1.25351	-0.999535	-1.51547	-1.5697	-1.54259	0.0271158	-0.149228	-0.096732	-0.12298
66*		S	LOC391722	391722		0.820083	0.582114	0.701098	-0.154221	-1.2528	-0.999142	-1.45952	-1.69112	-1.57532	0.115801	-0.150021	-0.313001	-0.231511
46*		S	ARV1	64801		0.628298	0.773902	0.7011	-0.15422	-1.25279	-0.999138	-1.56345	-1.46234	-1.5129	0.0505532	-0.103236	-0.109494	-0.106365
36*		S	KLHL2	11275		0.796758	0.605923	0.701341	-0.154071	-1.25173	-0.99855	-1.56046	-1.76145	-1.66096	0.100497	-0.117188	-0.20042	-0.158804
16*		S	F7	2155		0.797449	0.605239	0.701344	-0.154069	-1.25171	-0.998541	-1.75277	-1.59661	-1.67469	0.078082	-0.302359	-0.251085	-0.276722
24*		S	ASPM	259266		0.694994	0.707862	0.701428	-0.154017	-1.25134	-0.998336	-1.60717	-1.47001	-1.53859	0.0685811	-0.227744	-0.0652159	-0.14648
70*		S	SPINT4	391253		0.700802	0.702074	0.701438	-0.154011	-1.2513	-0.998312	-1.48495	-1.60645	-1.5457	0.0607511	-0.0731457	-0.210632	-0.141889
50*		S	SPPL2A	84888		0.597017	0.805863	0.70144	-0.154009	-1.25129	-0.998307	-1.48598	-1.56117	-1.52358	0.0375974	-0.148011	-0.146297	-0.147154
23*		S	TPCN2	219931		0.603534	0.799367	0.70145	-0.154003	-1.25124	-0.998281	-1.36316	-1.52892	-1.44604	0.0828811	-0.101756	-0.193353	-0.147555
36*		S	BTN3A2	11118		0.718053	0.684879	0.701466	-0.153993	-1.25117	-0.998243	-1.62445	-1.69469	-1.65957	0.0351202	-0.164149	-0.158142	-0.161146
59*		S	C17orf66	256957		0.608273	0.794752	0.701512	-0.153965	-1.25097	-0.998129	-1.5472	-1.5921	-1.56965	0.0224534	-0.229485	-0.208095	-0.21879
17*		S	SETDB2	83852		0.598406	0.804888	0.701647	-0.153881	-1.25037	-0.997801	-1.86483	-1.55772	-1.71128	0.153558	-0.401262	-0.141085	-0.271173
35*		S	ROD1	9991		0.641622	0.761753	0.701688	-0.153856	-1.2502	-0.997702	-1.58879	-1.67164	-1.63021	0.0414235	-0.156708	-0.379013	-0.26786
29*		S	MRPL49	535		0.811771	0.591629	0.7017	-0.153849	-1.25014	-0.997671	-1.40604	-1.80255	-1.60429	0.198256	0.00507	-0.412169	-0.20355
59*		S	RNF214	257160		0.724119	0.679289	0.701704	-0.153846	-1.25012	-0.997661	-1.45416	-1.68548	-1.56982	0.115662	-0.140779	-0.284791	-0.212785
63*		S	FAM108A2	91632		0.664668	0.738842	0.701755	-0.153814	-1.2499	-0.997537	-1.69181	-1.72598	-1.7089	0.0170893	-0.258861	-0.269038	-0.263949
61*		S	FAM159A	348378		0.738602	0.665241	0.701921	-0.153711	-1.24916	-0.99713	-1.45078	-1.81612	-1.63345	0.182668	-0.202617	-0.381422	-0.29202
21*		S	CLEC4D	338339		0.736457	0.667421	0.701939	-0.153701	-1.24909	-0.997087	-1.52705	-1.57561	-1.55133	0.0242791	-0.160047	-0.140365	-0.150206
63*		S	FLJ43752	401253		0.763985	0.639927	0.701956	-0.15369	-1.24901	-0.997045	-1.60257	-1.80562	-1.7041	0.101526	-0.187577	-0.330969	-0.259273
54*		S	C1orf88	128344		0.645467	0.75858	0.702024	-0.153648	-1.24871	-0.99688	-1.57081	-1.48926	-1.53004	0.0407776	-0.145804	-0.133502	-0.139653
12*		S	ZNF347	84671		0.814472	0.589619	0.702045	-0.153635	-1.24862	-0.996826	-1.49541	-1.54139	-1.5184	0.022994	-0.279449	-0.105433	-0.192441
22*		S	TLR2	7097		0.806611	0.5976	0.702106	-0.153598	-1.24835	-0.99668	-1.43863	-1.94596	-1.6923	0.253664	-0.0631632	-0.361553	-0.212358
70*		S	LOC400568	400568		0.714952	0.689332	0.702142	-0.153575	-1.24819	-0.996591	-1.47455	-1.6174	-1.54597	0.0714216	-0.0652725	-0.219724	-0.142498
42*		S	TMEM39B	55116		0.625072	0.779344	0.702208	-0.153534	-1.2479	-0.996429	-1.55563	-1.47114	-1.51338	0.0422431	-0.134107	-0.135974	-0.13504
25*		S	EVC	2121		0.755055	0.649437	0.702246	-0.153511	-1.24773	-0.996336	-1.68569	-1.63788	-1.66179	0.023905	-0.277385	-0.286084	-0.281735
68*		S	IFNWP2	3468		0.638421	0.766339	0.70238	-0.153428	-1.24714	-0.996009	-1.43495	-1.55596	-1.49546	0.0605049	-0.143906	-0.0881853	-0.116045
31*		S	NSF	4905		0.793239	0.611545	0.702392	-0.15342	-1.24709	-0.995979	-1.80676	-1.55564	-1.6812	0.125559	-0.239789	-0.186923	-0.213356
37*		S	EPB41L3	23136		0.694207	0.711388	0.702797	-0.15317	-1.2453	-0.994988	-1.52228	-1.66033	-1.5913	0.0690231	-0.193454	-0.206992	-0.200223
25*		S	COLQ	8292		0.639698	0.766029	0.702863	-0.153129	-1.24501	-0.994827	-1.78519	-1.54039	-1.66279	0.1224	-0.360084	-0.198592	-0.279338
26*		S	HIVEP1	3096		0.731893	0.673907	0.7029	-0.153106	-1.24485	-0.994737	-1.58787	-1.84498	-1.71643	0.128556	-0.128628	-0.328287	-0.228458
31*		S	NRD1	4898		0.631822	0.774251	0.703036	-0.153022	-1.24425	-0.994404	-1.95742	-1.43743	-1.69742	0.259999	-0.338226	-0.0845088	-0.211367
27*		S	NPM1	4869		0.724729	0.681382	0.703056	-0.15301	-1.24416	-0.994357	-1.46661	-1.67679	-1.5717	0.105087	-0.0612453	-0.177904	-0.119574
30*		S	ICAM4	3386		0.631451	0.774725	0.703088	-0.15299	-1.24402	-0.994278	-1.73093	-1.57125	-1.65109	0.0798435	-0.347863	-0.0930108	-0.220437
50*		S	C13orf33	84935		0.810635	0.595661	0.703148	-0.152953	-1.24375	-0.994131	-1.31789	-1.74462	-1.53126	0.213365	0.00269067	-0.290693	-0.144001
43*		S	ECHDC1	55862		0.787628	0.619018	0.703323	-0.152845	-1.24298	-0.993703	-1.49206	-1.82885	-1.66045	0.168398	-0.0393537	-0.374779	-0.207066
32*		S	PSMA4	5685		0.648412	0.75855	0.703481	-0.152748	-1.24229	-0.993317	-1.68068	-1.70392	-1.6923	0.0116195	-0.290917	-0.233816	-0.262367
51*		S	KRTAP4-5	85289		0.712473	0.694584	0.703529	-0.152718	-1.24208	-0.993201	-1.64405	-1.93667	-1.79036	0.146311	-0.157294	-0.350756	-0.254025
35*		S	RCAN2	10231		0.706236	0.700823	0.70353	-0.152718	-1.24207	-0.993198	-1.53949	-1.72892	-1.6342	0.0947173	-0.118917	-0.435737	-0.277327
71*		S	LOC284757	284757		0.644844	0.762246	0.703545	-0.152708	-1.24201	-0.993161	-1.6225	-1.4354	-1.52895	0.0935542	-0.30884	-0.0614066	-0.185123
20*		S	CNTFR	1271		0.630658	0.776547	0.703603	-0.152673	-1.24175	-0.99302	-1.59891	-1.29041	-1.44466	0.15425	-0.145603	0.0205026	-0.0625502
46*		S	C1orf50	79078		0.710581	0.696702	0.703642	-0.152649	-1.24158	-0.992925	-1.50062	-1.52218	-1.5114	0.0107826	-0.0591112	-0.161651	-0.110381
22*		S	RYR3	6263		0.679164	0.728318	0.703741	-0.152587	-1.24114	-0.992681	-1.53791	-1.82169	-1.6798	0.141891	-0.143752	-0.27646	-0.210106
69*		S	C12orf68	387856		0.713015	0.694478	0.703747	-0.152584	-1.24112	-0.992668	-1.63872	-1.93687	-1.78779	0.149076	-0.283539	-0.385487	-0.334513
71*		S	BOLA3	388962		0.666911	0.740781	0.703846	-0.152522	-1.24068	-0.992425	-1.60195	-1.453	-1.52747	0.0744751	-0.289057	-0.0758287	-0.182443
58*		S	SLC44A5	204962		0.78035	0.627355	0.703852	-0.152518	-1.24065	-0.992409	-1.44537	-1.85658	-1.65098	0.205604	-0.0652433	-0.295032	-0.180137
71*		S	LOC401570	401570		0.717887	0.689939	0.703913	-0.152481	-1.24039	-0.992261	-1.55446	-1.49468	-1.52457	0.0298862	-0.243356	-0.109989	-0.176672
58*		S	CTAG1A	246100		0.780682	0.627178	0.70393	-0.152471	-1.24031	-0.992219	-1.44508	-1.85673	-1.6509	0.205824	-0.0650073	-0.295134	-0.180071
43*		S	GOLSYN	55638		0.62089	0.787415	0.704152	-0.152333	-1.23933	-0.991675	-1.62918	-1.68821	-1.6587	0.0295125	-0.131079	-0.261266	-0.196173
56*		S	ASPRV1	151516		0.77779	0.630606	0.704198	-0.152305	-1.23913	-0.991564	-1.48755	-1.53719	-1.51237	0.0248202	-0.131183	-0.0965244	-0.113854
35*		S	PIGK	10026		0.797909	0.610514	0.704211	-0.152297	-1.23907	-0.991531	-1.46954	-1.81383	-1.64168	0.172145	-0.0653008	-0.519814	-0.292557
20*		S	PPM2C	54704		0.603628	0.804826	0.704227	-0.152287	-1.23901	-0.991493	-1.62075	-1.27067	-1.44571	0.175042	-0.161612	0.0389573	-0.0613273
43*		S	ANKRD10	55608		0.683107	0.725363	0.704235	-0.152282	-1.23897	-0.991474	-1.57802	-1.74003	-1.65902	0.0810092	-0.0968525	-0.303094	-0.199973
50*		S	TMEM185A	84548		0.687524	0.720956	0.70424	-0.152279	-1.23895	-0.991462	-1.41476	-1.63527	-1.52502	0.110256	-0.0841607	-0.204623	-0.144392
71*		S	OR8K1	390157		0.770659	0.637923	0.704291	-0.152248	-1.23872	-0.991337	-1.50529	-1.53733	-1.52131	0.0160207	-0.196045	-0.144938	-0.170492
61*		S	OSTN	344901		0.813986	0.594645	0.704315	-0.152233	-1.23862	-0.991277	-1.39208	-1.87902	-1.63555	0.24347	-0.141839	-0.433563	-0.287701
50*		S	FAM126A	84668		0.769307	0.639434	0.704371	-0.152199	-1.23837	-0.991142	-1.35041	-1.70642	-1.52841	0.178005	-0.0264651	-0.260623	-0.143544
30*		S	MOBP	4336		0.661303	0.747456	0.70438	-0.152193	-1.23833	-0.99112	-1.70555	-1.59445	-1.65	0.0555521	-0.325748	-0.108463	-0.217105
27*		S	C17orf75	64149		0.718295	0.690737	0.704516	-0.152109	-1.23773	-0.990787	-1.47182	-1.6671	-1.56946	0.0976396	-0.0652205	-0.171193	-0.118207
47*		S	FLJ12529	79869		0.807363	0.601679	0.704521	-0.152106	-1.23771	-0.990775	-1.57584	-1.50186	-1.53885	0.0369904	-0.0989167	-0.160039	-0.129478
26*		S	FLI1	2313		0.596063	0.813153	0.704608	-0.152052	-1.23733	-0.990562	-1.7092	-1.72627	-1.71773	0.00853618	-0.215747	-0.240809	-0.228278
30*		S	HLF	3131		0.701372	0.707845	0.704608	-0.152052	-1.23733	-0.990561	-1.67148	-1.62814	-1.64981	0.0216669	-0.296063	-0.130908	-0.213486
38*		S	ABHD12	26090		0.656504	0.752935	0.70472	-0.151984	-1.23684	-0.990289	-1.83406	-1.52934	-1.6817	0.15236	-0.31528	-0.111118	-0.213199
69*		S	LOC400134	400134		0.796593	0.612877	0.704735	-0.151974	-1.23677	-0.990251	-1.57099	-2.00993	-1.79046	0.219467	-0.223464	-0.438297	-0.330881
66*		S	UNQ6490	389102		0.812509	0.597479	0.704994	-0.151815	-1.23563	-0.989618	-1.46588	-1.67963	-1.57276	0.106878	-0.156141	-0.302922	-0.229531
47*		S	KLHL36	79786		0.76627	0.644248	0.705259	-0.151651	-1.23447	-0.98897	-1.61021	-1.47081	-1.54051	0.0696983	-0.121602	-0.132629	-0.127115
15*		S	HIF1AN	55662		0.716818	0.693797	0.705307	-0.151621	-1.23426	-0.988852	-1.62911	-1.58152	-1.60531	0.0237944	-0.189545	-0.172298	-0.180922
43*		S	BIN3	55909		0.675992	0.734654	0.705323	-0.151612	-1.23419	-0.988814	-1.58387	-1.73227	-1.65807	0.0742036	-0.100767	-0.296831	-0.198799
26*		S	LHFPL2	10184		0.698113	0.712535	0.705324	-0.151611	-1.23418	-0.988811	-1.61804	-1.81205	-1.71505	0.0970032	-0.150294	-0.30402	-0.227157
55*		S	ZNF560	147741		0.634672	0.775997	0.705334	-0.151605	-1.23414	-0.988786	-1.7903	-1.47658	-1.63344	0.15686	-0.264063	-0.0427713	-0.153417
71*		S	C5orf40	408263		0.710588	0.700227	0.705407	-0.15156	-1.23382	-0.988607	-1.56126	-1.48625	-1.52375	0.0375039	-0.2499	-0.103077	-0.176488
8*		S	CHRM3	1131		0.701463	0.709595	0.705529	-0.151485	-1.23328	-0.98831	-1.53752	-1.59567	-1.5666	0.0290789	-0.147566	-0.204404	-0.175985
9*		S	LTB4R2	4543		0.627172	0.783945	0.705558	-0.151467	-1.23315	-0.988238	-1.59854	-1.65304	-1.62579	0.0272492	-0.185849	-0.220785	-0.203317
10*		S	HIST1H1C	3006		0.674865	0.736293	0.705579	-0.151454	-1.23306	-0.988188	-1.59106	-1.71019	-1.65063	0.0595665	-0.169361	-0.268086	-0.218724
29*		S	DIO3	1641		0.788708	0.622472	0.70559	-0.151448	-1.23302	-0.988161	-1.42384	-1.77376	-1.5988	0.17496	-0.00742112	-0.387082	-0.197252
37*		S	PDS5A	23244		0.677808	0.733473	0.705641	-0.151417	-1.23279	-0.988038	-1.53593	-1.64343	-1.58968	0.0537495	-0.206085	-0.194153	-0.200119
48*		S	TDRD3	81550		0.653493	0.758204	0.705848	-0.151289	-1.23188	-0.987529	-1.64279	-1.71392	-1.67835	0.0355658	-0.247788	-0.386804	-0.317296
63*		S	ZNF321	399669		0.753807	0.658381	0.706094	-0.151137	-1.2308	-0.986929	-1.61171	-1.79076	-1.70124	0.0895252	-0.194882	-0.319415	-0.257149
43*		S	RNF130	55819		0.715117	0.697273	0.706195	-0.151075	-1.23036	-0.986682	-1.55169	-1.76349	-1.65759	0.105902	-0.0792432	-0.322029	-0.200636
47*		S	TBL1XR1	79718		0.612463	0.800303	0.706383	-0.15096	-1.22954	-0.986222	-1.73884	-1.35699	-1.54792	0.190926	-0.206509	-0.0321433	-0.119326
50*		S	SERAC1	84947		0.739223	0.67357	0.706396	-0.150951	-1.22948	-0.986189	-1.37408	-1.67663	-1.52536	0.151273	-0.0476885	-0.237174	-0.142431
27*		S	PECI	10455		0.59455	0.818329	0.706439	-0.150925	-1.22929	-0.986084	-1.57196	-1.53496	-1.55346	0.0184999	-0.141675	-0.0796753	-0.110675
32*		S	SLC1A5	6510		0.678518	0.73457	0.706544	-0.150861	-1.22883	-0.985829	-1.65665	-1.72387	-1.69026	0.0336108	-0.27024	-0.24873	-0.259485
51*		S	ZNF625	90589		0.650992	0.762128	0.70656	-0.150851	-1.22876	-0.98579	-1.70324	-1.86624	-1.78474	0.0814972	-0.198617	-0.303391	-0.251004
51*		S	MED30	90390		0.830084	0.583318	0.706701	-0.150764	-1.22814	-0.985445	-1.5308	-2.05269	-1.79175	0.260942	-0.078245	-0.42878	-0.253512
36*		S	PRSS21	10942		0.788172	0.625301	0.706736	-0.150742	-1.22799	-0.985358	-1.56744	-1.74507	-1.65625	0.0888137	-0.122311	-0.190044	-0.156177
27*		S	ZMYND8	23613		0.813062	0.600447	0.706754	-0.150731	-1.22791	-0.985314	-1.39513	-1.76061	-1.57787	0.182738	-0.00666959	-0.235956	-0.121313
49*		S	ZNF644	84146		0.613594	0.800233	0.706913	-0.150634	-1.22721	-0.984926	-1.69166	-1.40467	-1.54817	0.143495	-0.159232	-0.0996293	-0.129431
68*		S	LOC389983	389983		0.814987	0.599251	0.707119	-0.150507	-1.22631	-0.984423	-1.3126	-1.69752	-1.50506	0.192457	-0.0224717	-0.184409	-0.10344
42*		S	WDR70	55100		0.626521	0.788017	0.707269	-0.150415	-1.22565	-0.984056	-1.55459	-1.46381	-1.5092	0.0453893	-0.133303	-0.129312	-0.131308
64*		S	OR7G1	125962		0.673688	0.741138	0.707413	-0.150327	-1.22502	-0.983704	-1.81572	-1.53566	-1.67569	0.14003	-0.29498	-0.0962992	-0.19564
59*		S	LOC283439	283439		0.786355	0.628717	0.707536	-0.150251	-1.22448	-0.983404	-1.40418	-1.72638	-1.56528	0.161103	-0.0931234	-0.318384	-0.205754
55*		S	PTGR2	145482		0.725219	0.690003	0.707611	-0.150205	-1.22416	-0.98322	-1.71312	-1.55383	-1.63348	0.0796447	-0.209883	-0.0960766	-0.15298
24*		S	CYC1	1537		0.589428	0.82602	0.707724	-0.150136	-1.22366	-0.982944	-1.69624	-1.37418	-1.53521	0.161032	-0.304497	0.00660273	-0.148947
27*		S	PNMA1	9240		0.755435	0.660038	0.707736	-0.150128	-1.22361	-0.982914	-1.44176	-1.69889	-1.57033	0.128564	-0.0422739	-0.193213	-0.117743
20*		S	TREM1	54210		0.723948	0.691637	0.707793	-0.150094	-1.22336	-0.982777	-1.52351	-1.34967	-1.43659	0.0869196	-0.0903499	-0.0349093	-0.0626296
63*		S	GRINA	2907		0.66076	0.754971	0.707866	-0.150049	-1.22304	-0.982598	-1.69532	-1.713	-1.70416	0.00884084	-0.261666	-0.258939	-0.260302
18*		S	AIPL1	23746		0.718313	0.697782	0.708048	-0.149938	-1.22225	-0.982153	-1.76709	-1.99789	-1.88249	0.1154	-0.138983	-0.287346	-0.213164
43*		S	PCDHGA1	56114		0.659969	0.756128	0.708048	-0.149937	-1.22224	-0.982151	-1.59704	-1.71434	-1.65569	0.0586474	-0.109581	-0.282356	-0.195969
63*		S	HIST1H2AJ	8331		0.739373	0.676725	0.708049	-0.149937	-1.22224	-0.98215	-1.62468	-1.776	-1.70034	0.0756563	-0.205242	-0.30793	-0.256586
63*		S	SUPV3L1	6832		0.749501	0.666663	0.708082	-0.149916	-1.2221	-0.982069	-1.61558	-1.7841	-1.69984	0.0842568	-0.197973	-0.31423	-0.256101
20*		S	MTMR3	8897		0.65606	0.760149	0.708105	-0.149903	-1.222	-0.982014	-1.57838	-1.30185	-1.44011	0.138263	-0.130558	0.00980133	-0.0603783
44*		S	PRR12	57479		0.789118	0.627174	0.708146	-0.149877	-1.22182	-0.981912	-1.90496	-1.73557	-1.82027	0.0846982	-0.397149	-0.221836	-0.309492
17*		S	TAP2	6891		0.673464	0.742842	0.708153	-0.149873	-1.22178	-0.981895	-1.79735	-1.60664	-1.70199	0.095352	-0.347073	-0.179393	-0.263233
64*		S	LOC285253	285253		0.675502	0.740847	0.708175	-0.14986	-1.22169	-0.981843	-1.81393	-1.53588	-1.67491	0.139027	-0.29369	-0.0964566	-0.195073
33*		S	ZNF225	7768		0.791984	0.624839	0.708411	-0.149714	-1.22065	-0.981263	-1.63749	-1.7759	-1.7067	0.0692047	-0.222087	-0.181502	-0.201795
52*		S	TRIM41	90933		0.796663	0.620229	0.708446	-0.149693	-1.2205	-0.981179	-1.44021	-1.63283	-1.53652	0.0963105	-0.0854185	-0.139686	-0.112552
52*		S	LIN52	91750		0.637667	0.779257	0.708462	-0.149683	-1.22043	-0.98114	-1.5612	-1.51316	-1.53718	0.0240186	-0.187995	-0.0582584	-0.123127
47*		S	LONRF3	79836		0.622665	0.794412	0.708538	-0.149637	-1.2201	-0.980953	-1.73031	-1.36129	-1.5458	0.184511	-0.200877	-0.0359366	-0.118407
47*		S	TCTN2	79867		0.763108	0.654234	0.708671	-0.149555	-1.21952	-0.980629	-1.61285	-1.46353	-1.53819	0.0746622	-0.123347	-0.126198	-0.124773
39*		S	PCSK1N	27344		0.600809	0.81663	0.708719	-0.149526	-1.21931	-0.98051	-1.96636	-1.49711	-1.73174	0.234624	-0.382346	-0.164398	-0.273372
58*		S	KCTD20	222658		0.695245	0.722525	0.708885	-0.149424	-1.21858	-0.980106	-1.51999	-1.77633	-1.64816	0.128167	-0.125738	-0.240111	-0.182925
37*		S	SIPA1L3	23094		0.719999	0.697862	0.708931	-0.149396	-1.21839	-0.979995	-1.50081	-1.67068	-1.58574	0.0849327	-0.173588	-0.214855	-0.194222
35*		S	ARIH2	10425		0.765023	0.65305	0.709036	-0.149331	-1.21792	-0.979735	-1.49463	-1.77384	-1.63423	0.139603	-0.0845347	-0.480213	-0.282374
48*		S	CEP70	80321		0.794124	0.623976	0.70905	-0.149323	-1.21786	-0.979702	-1.52309	-1.82814	-1.67562	0.152523	-0.146738	-0.495446	-0.321092
54*		S	ASB7	140460		0.788829	0.629333	0.709081	-0.149304	-1.21773	-0.979627	-1.45299	-1.58317	-1.51808	0.0650894	-0.0548028	-0.215601	-0.135202
31*		S	POLR2F	5435		0.702227	0.715969	0.709098	-0.149294	-1.21765	-0.979585	-1.89171	-1.47977	-1.68574	0.205969	-0.295291	-0.121194	-0.208242
69*		S	LOC390234	390234		0.569612	0.848757	0.709184	-0.149241	-1.21728	-0.979374	-1.75491	-1.79874	-1.77683	0.0219107	-0.386614	-0.285642	-0.336128
28*		S	PTPRCAP	5790		0.670684	0.747689	0.709187	-0.14924	-1.21727	-0.979369	-1.51966	-1.56406	-1.54186	0.0222026	-0.173763	-0.123288	-0.148525
22*		S	PPARGC1B	133522		0.708927	0.709581	0.709254	-0.149198	-1.21697	-0.979204	-1.51472	-1.8395	-1.67711	0.162389	-0.124932	-0.288657	-0.206795
40*		S	RNF181	51255		0.694464	0.724118	0.709291	-0.149176	-1.21681	-0.979113	-1.48818	-1.6812	-1.58469	0.0965118	-0.157703	-0.230131	-0.193917
22*		S	EPAS1	2034		0.774195	0.644467	0.709331	-0.149151	-1.21664	-0.979015	-1.46388	-1.90141	-1.68264	0.218761	-0.0836609	-0.331044	-0.207352
55*		S	DSG4	147409		0.673557	0.745464	0.709511	-0.149041	-1.21585	-0.978577	-1.75716	-1.50401	-1.63059	0.126574	-0.240796	-0.0616978	-0.151247
29*		S	ATP5O	1		0.810416	0.608616	0.709516	-0.149038	-1.21583	-0.978563	-1.40708	-1.7867	-1.59689	0.189807	0.00433612	-0.398353	-0.197008
18*		S	OASL	8638		0.833798	0.585496	0.709647	-0.148958	-1.21526	-0.978243	-1.63027	-2.12153	-1.8759	0.24563	-0.0682554	-0.356556	-0.212406
48*		S	GSG1	83445		0.602037	0.817549	0.709793	-0.148868	-1.21462	-0.977886	-1.68658	-1.66342	-1.675	0.0115812	-0.284761	-0.338771	-0.311766
28*		S	KIAA1303	57521		0.64989	0.769884	0.709887	-0.148811	-1.21421	-0.977656	-1.53503	-1.54654	-1.54079	0.00575816	-0.187601	-0.110711	-0.149156
57*		S	ZNF383	163087		0.765673	0.654149	0.709911	-0.148796	-1.2141	-0.977597	-1.87497	-1.54144	-1.70821	0.166768	-0.339456	-0.206852	-0.273154
35*		S	RNF10	9921		0.77942	0.64064	0.71003	-0.148723	-1.21359	-0.977307	-1.48365	-1.7855	-1.63457	0.150929	-0.0761144	-0.491767	-0.283941
62*		S	FLJ46026	400627		0.693111	0.727391	0.710251	-0.148588	-1.21262	-0.976766	-1.48741	-1.5883	-1.53785	0.0504461	-0.151676	-0.245324	-0.1985
43*		S	NHP2	55651		0.648423	0.77211	0.710267	-0.148579	-1.21255	-0.976728	-1.60654	-1.70099	-1.65377	0.0472256	-0.115933	-0.271583	-0.193758
50*		S	N-PAC	84656		0.607076	0.813524	0.7103	-0.148558	-1.21241	-0.976646	-1.47806	-1.55449	-1.51628	0.038212	-0.140915	-0.141034	-0.140974
59*		S	GPR133	283383		0.812064	0.608624	0.710344	-0.148531	-1.21222	-0.976539	-1.38353	-1.74263	-1.56308	0.179551	-0.0734374	-0.331731	-0.202584
28*		S	SLC25A4	291		0.788074	0.633111	0.710592	-0.148379	-1.21113	-0.975931	-1.4329	-1.65451	-1.5437	0.110806	-0.0956369	-0.188212	-0.141924
22*		S	GABRA1	2554		0.816951	0.604401	0.710676	-0.148328	-1.21077	-0.975727	-1.43058	-1.9395	-1.68504	0.254459	-0.0566248	-0.357125	-0.206875
17*		S	PCNA	5111		0.622344	0.799051	0.710697	-0.148315	-1.21067	-0.975675	-1.84331	-1.56232	-1.70282	0.140494	-0.38398	-0.144688	-0.264334
58*		S	BEND7	222389		0.730006	0.691433	0.710719	-0.148302	-1.21058	-0.975621	-1.48951	-1.80255	-1.64603	0.156516	-0.101029	-0.258054	-0.179541
26*		S	KRT17	3872		0.677821	0.744081	0.710951	-0.14816	-1.20957	-0.975055	-1.63617	-1.78516	-1.71066	0.0744935	-0.163309	-0.284202	-0.223755
57*		S	ZNF550	162972		0.812857	0.609388	0.711122	-0.148056	-1.20882	-0.974636	-1.83156	-1.57598	-1.70377	0.127791	-0.309	-0.238753	-0.273877
39*		S	DEXI	28955		0.816912	0.605495	0.711203	-0.148006	-1.20847	-0.974438	-1.76332	-1.66618	-1.71475	0.0485652	-0.240744	-0.320038	-0.280391
58*		S	C2orf69	205327		0.672051	0.750521	0.711286	-0.147956	-1.20811	-0.974236	-1.54033	-1.75272	-1.64652	0.106195	-0.142225	-0.223956	-0.18309
8*		S	CELSR3	1951		0.652472	0.770125	0.711298	-0.147948	-1.20806	-0.974205	-1.57954	-1.54134	-1.56044	0.0190983	-0.182226	-0.166206	-0.174216
52*		S	GRIN3B	116444		0.670145	0.752645	0.711395	-0.147889	-1.20764	-0.97397	-1.53648	-1.53319	-1.53483	0.00164868	-0.167041	-0.0718846	-0.119463
37*		S	NUDCD3	23386		0.595169	0.82791	0.711539	-0.147801	-1.20701	-0.973616	-1.60473	-1.57119	-1.58796	0.0167714	-0.269735	-0.139253	-0.204494
32*		S	SLC6A7	6534		0.677073	0.74609	0.711581	-0.147775	-1.20682	-0.973514	-1.6578	-1.71429	-1.68604	0.0282426	-0.271232	-0.241565	-0.256399
58*		S	NKAPL	222698		0.648453	0.774801	0.711627	-0.147748	-1.20663	-0.973402	-1.56102	-1.73225	-1.64663	0.0856123	-0.158999	-0.209944	-0.184472
58*		S	SLC29A4	222962		0.761347	0.662061	0.711704	-0.147701	-1.20629	-0.973214	-1.46203	-1.82731	-1.64467	0.18264	-0.0787511	-0.275004	-0.176877
43*		S	LARP6	55323		0.736615	0.686814	0.711715	-0.147694	-1.20625	-0.973188	-1.53401	-1.77223	-1.65312	0.11911	-0.0674168	-0.329079	-0.198248
29*		S	CACNB3	740		0.682263	0.741201	0.711732	-0.147684	-1.20617	-0.973146	-1.50604	-1.66296	-1.5845	0.0784596	-0.0650726	-0.29051	-0.177792
38*		S	C1orf77	26097		0.633294	0.79035	0.711822	-0.147629	-1.20578	-0.972926	-1.85411	-1.4979	-1.67601	0.178104	-0.329912	-0.0870328	-0.208472
38*		S	DKFZP434B0335	25851		0.756841	0.666862	0.711851	-0.147611	-1.20565	-0.972854	-1.74739	-1.60166	-1.67452	0.0728603	-0.252027	-0.166526	-0.209276
42*		S	CCDC25	55246		0.685635	0.738086	0.711861	-0.147605	-1.20561	-0.972832	-1.51217	-1.50602	-1.5091	0.00307565	-0.100534	-0.167666	-0.1341
59*		S	TTC9C	283237		0.741089	0.682788	0.711939	-0.147558	-1.20527	-0.972641	-1.44053	-1.68265	-1.56159	0.121061	-0.127785	-0.282467	-0.205126
50*		S	C5orf32	84418		0.782996	0.640888	0.711942	-0.147555	-1.20526	-0.972632	-1.33964	-1.70515	-1.52239	0.182756	-0.0168079	-0.259625	-0.138216
17*		S	MMP1	4312		0.646578	0.777311	0.711944	-0.147554	-1.20524	-0.972626	-1.82152	-1.57946	-1.70049	0.121028	-0.366484	-0.158111	-0.262297
60*		S	XKR6	286046		0.811298	0.612636	0.711967	-0.14754	-1.20515	-0.972571	-1.45775	-1.60715	-1.53245	0.0746983	0.00443246	-0.214282	-0.104925
71*		S	XKRY	9082		0.777272	0.646851	0.712062	-0.147482	-1.20474	-0.97234	-1.49913	-1.53001	-1.51457	0.015441	-0.190116	-0.138939	-0.164528
21*		S	FCER1G	2207		0.666195	0.758136	0.712166	-0.147419	-1.20428	-0.972086	-1.58471	-1.50147	-1.54309	0.0416204	-0.209835	-0.084977	-0.147406
66*		S	C2orf80	389073		0.67398	0.750367	0.712174	-0.147414	-1.20425	-0.972066	-1.58218	-1.56532	-1.57375	0.00842749	-0.268081	-0.202629	-0.235355
39*		S	SMR3A	26952		0.653157	0.771376	0.712267	-0.147357	-1.20384	-0.971839	-1.91718	-1.53335	-1.72527	0.191912	-0.348045	-0.197757	-0.272901
36*		S	COPG	22820		0.76086	0.663709	0.712284	-0.147347	-1.20377	-0.971795	-1.58965	-1.71259	-1.65112	0.0614725	-0.138607	-0.169478	-0.154042
63*		S	HIST1H2BI	8346		0.825625	0.599012	0.712318	-0.147326	-1.20362	-0.971712	-1.54719	-1.83856	-1.69287	0.145689	-0.143336	-0.356587	-0.249961
33*		S	BANF1	8815		0.692213	0.732466	0.71234	-0.147313	-1.20353	-0.97166	-1.72405	-1.68098	-1.70251	0.0215319	-0.292224	-0.125121	-0.208672
25*		S	COL15A1	1306		0.738873	0.685915	0.712394	-0.14728	-1.20329	-0.971527	-1.69965	-1.60738	-1.65351	0.0461349	-0.288986	-0.25871	-0.273848
46*		S	C17orf53	78995		0.687195	0.737596	0.712395	-0.147279	-1.20328	-0.971524	-1.51847	-1.49048	-1.50448	0.013995	-0.0716521	-0.134023	-0.102838
44*		S	ZNF304	57343		0.616274	0.808755	0.712515	-0.147206	-1.20277	-0.971233	-2.08875	-1.58963	-1.83919	0.24956	-0.537684	-0.12016	-0.328922
30*		S	GSTA2	2939		0.700845	0.724298	0.712572	-0.147172	-1.20252	-0.971093	-1.67193	-1.61415	-1.64304	0.0288898	-0.296454	-0.121585	-0.209019
34*		S	NDST3	9348		0.796845	0.628487	0.712666	-0.147114	-1.20211	-0.970862	-1.74132	-1.61802	-1.67967	0.0616538	-0.242924	-0.171796	-0.20736
42*		S	GPATCH2	55105		0.804211	0.621127	0.712669	-0.147112	-1.20209	-0.970855	-1.42709	-1.6049	-1.51599	0.0889033	-0.034803	-0.257506	-0.146155
32*		S	SLC16A2	6567		0.688989	0.736375	0.712682	-0.147104	-1.20204	-0.970823	-1.64829	-1.72237	-1.68533	0.0370398	-0.263048	-0.247607	-0.255328
17*		S	PPP1CC	5501		0.7719	0.653533	0.712716	-0.147083	-1.20189	-0.970739	-1.70884	-1.67706	-1.69295	0.015888	-0.276007	-0.234534	-0.25527
47*		S	ZDHHC11	79844		0.47627	0.949283	0.712777	-0.147047	-1.20163	-0.970592	-1.85275	-1.24833	-1.55054	0.302208	-0.281692	0.0637863	-0.108953
42*		S	CYP2W1	54905		0.672696	0.752882	0.712789	-0.147039	-1.20157	-0.970562	-1.52146	-1.49351	-1.50748	0.0139719	-0.107707	-0.156301	-0.132004
29*		S	CACNB1	734		0.793465	0.632119	0.712792	-0.147037	-1.20156	-0.970554	-1.42017	-1.76476	-1.59247	0.172295	-0.00484469	-0.379236	-0.19204
34*		S	SYNGR2	9144		0.816262	0.609477	0.71287	-0.14699	-1.20122	-0.970365	-1.72505	-1.63295	-1.679	0.0460481	-0.231147	-0.182908	-0.207027
52*		S	REEP6	92840		0.714455	0.711363	0.712909	-0.146966	-1.20105	-0.970268	-1.50277	-1.56425	-1.53351	0.0307427	-0.138455	-0.0930223	-0.115739
24*		S	ARPC1A	10552		0.81064	0.615353	0.712997	-0.146913	-1.20067	-0.970054	-1.5096	-1.54504	-1.52732	0.0177206	-0.143663	-0.121445	-0.132554
17*		S	IFITM1	8519		0.827934	0.598202	0.713068	-0.146869	-1.20036	-0.96988	-1.65845	-1.72069	-1.68957	0.0311175	-0.235553	-0.268696	-0.252124
12*		S	CBFA2T3	863		0.924194	0.502012	0.713103	-0.146848	-1.20021	-0.969794	-1.40119	-1.61258	-1.50688	0.105693	-0.172641	-0.158008	-0.165325
22*		S	CUBN	8029		0.824363	0.601868	0.713116	-0.14684	-1.20015	-0.969763	-1.42481	-1.9419	-1.68335	0.25855	-0.051938	-0.358774	-0.205356
57*		S	GKN2	200504		0.833131	0.593109	0.71312	-0.146837	-1.20013	-0.969752	-1.81291	-1.58854	-1.70072	0.112183	-0.295914	-0.250355	-0.273134
50*		S	CSPG4LYP2	84664		0.643391	0.782961	0.713176	-0.146803	-1.19989	-0.969615	-1.44949	-1.58116	-1.51533	0.065836	-0.115295	-0.162029	-0.138662
17*		S	SH3GL2	6456		0.763812	0.66269	0.713251	-0.146758	-1.19957	-0.969432	-1.71611	-1.66984	-1.69297	0.0231342	-0.281846	-0.22888	-0.255363
25*		S	CNTN6	27255		0.743539	0.682991	0.713265	-0.146749	-1.1995	-0.969398	-1.69562	-1.60982	-1.65272	0.0429001	-0.285641	-0.260905	-0.273273
67*		S	AZGP1P2	401393		0.866634	0.560293	0.713464	-0.146628	-1.19864	-0.968913	-1.46018	-1.97063	-1.7154	0.255222	-0.0177316	-0.434077	-0.225904
37*		S	ZNF365	22891		0.728503	0.698783	0.713643	-0.146519	-1.19786	-0.968474	-1.49373	-1.66997	-1.58185	0.0881201	-0.167038	-0.21432	-0.190679
66*		S	LOC389166	389166		0.735621	0.691828	0.713724	-0.146469	-1.19751	-0.968275	-1.53043	-1.60909	-1.56976	0.0393313	-0.218271	-0.24103	-0.229651
40*		S	SNX7	51375		0.723036	0.704523	0.71378	-0.146436	-1.19727	-0.96814	-1.4657	-1.69824	-1.58197	0.116271	-0.137241	-0.243108	-0.190175
48*		S	ANKRD13C	81573		0.639117	0.788469	0.713793	-0.146428	-1.19721	-0.968107	-1.65502	-1.68816	-1.67159	0.0165712	-0.258118	-0.362308	-0.310213
16*		S	VNN2	8875		0.687018	0.740678	0.713848	-0.146394	-1.19697	-0.967973	-1.84931	-1.49034	-1.66983	0.179488	-0.379051	-0.154168	-0.266609
59*		S	CCDC153	283152		0.780461	0.647373	0.713917	-0.146352	-1.19667	-0.967804	-1.40891	-1.71129	-1.5601	0.151192	-0.0976366	-0.305992	-0.201814
22*		S	POMC	5443		0.787118	0.640734	0.713926	-0.146347	-1.19664	-0.967782	-1.45382	-1.90496	-1.67939	0.225569	-0.0754892	-0.333474	-0.204482
18*		S	ARFGEF2	10564		0.767653	0.660202	0.713928	-0.146346	-1.19663	-0.967778	-1.70863	-2.03927	-1.87395	0.165318	-0.108765	-0.310509	-0.209637
64*		S	LOC200810	200810		0.811195	0.616969	0.714082	-0.146252	-1.19596	-0.967401	-1.68002	-1.62791	-1.65397	0.0260533	-0.197198	-0.163472	-0.180335
19*		S	KIF3B	9371		0.628842	0.799416	0.714129	-0.146223	-1.19576	-0.967286	-1.70673	-1.46922	-1.58797	0.118755	-0.223175	-0.0836981	-0.153437
43*		S	IQCC	55721		0.757715	0.67066	0.714187	-0.146188	-1.1955	-0.967143	-1.51666	-1.78572	-1.65119	0.134532	-0.0558093	-0.339968	-0.197889
35*		S	NXF1	10482		0.773982	0.655243	0.714612	-0.145929	-1.19366	-0.966104	-1.48779	-1.77178	-1.62978	0.14199	-0.0792949	-0.478172	-0.278733
66*		S	LOC391540	391540		0.768535	0.66075	0.714642	-0.145911	-1.19353	-0.96603	-1.5028	-1.63233	-1.56756	0.0647656	-0.191675	-0.261417	-0.226546
25*		S	ERCC4	2072		0.657374	0.771946	0.71466	-0.145901	-1.19345	-0.965988	-1.76994	-1.53544	-1.65269	0.117251	-0.347412	-0.194152	-0.270782
51*		S	MRLC2	103910		0.709376	0.720239	0.714808	-0.145811	-1.19281	-0.965627	-1.64703	-1.90992	-1.77847	0.131444	-0.159375	-0.332766	-0.246071
42*		S	FLJ20433	54932		0.766108	0.663601	0.714854	-0.145782	-1.19261	-0.965512	-1.45443	-1.56899	-1.51171	0.0572797	-0.055925	-0.224881	-0.140403
49*		S	SOX7	83595		0.591321	0.838466	0.714893	-0.145759	-1.19244	-0.965417	-1.71056	-1.37513	-1.54285	0.167717	-0.171402	-0.0710599	-0.121231
13*		S	IRF3	3661		0.682142	0.747754	0.714948	-0.145726	-1.1922	-0.965283	-1.74411	-1.57835	-1.66123	0.0828804	-0.272242	-0.199707	-0.235975
19*		S	KIF5B	3799		0.815389	0.614508	0.714948	-0.145725	-1.1922	-0.965282	-1.54687	-1.60557	-1.57622	0.0293533	-0.106605	-0.19391	-0.150258
48*		S	FLJ14107	80094		0.8355	0.59472	0.71511	-0.145627	-1.1915	-0.964887	-1.48788	-1.85303	-1.67045	0.182578	-0.117008	-0.519126	-0.318067
35*		S	LEPREL2	10536		0.776694	0.653687	0.71519	-0.145578	-1.19115	-0.964691	-1.48573	-1.77324	-1.62948	0.143756	-0.0777088	-0.47962	-0.278665
25*		S	SGEF	26084		0.826257	0.604167	0.715212	-0.145565	-1.19106	-0.964638	-1.62428	-1.67574	-1.65001	0.0257288	-0.226342	-0.320055	-0.273198
25*		S	CCNC	892		0.601335	0.82911	0.715222	-0.145559	-1.19102	-0.964612	-1.81828	-1.48764	-1.65296	0.165319	-0.387586	-0.151256	-0.269421
65*		S	LOC286080	286080		0.762217	0.668359	0.715288	-0.145519	-1.19073	-0.964452	-1.5258	-1.56637	-1.54608	0.020285	-0.220215	-0.0835605	-0.151888
10*		S	HNT	50863		0.93811	0.492576	0.715343	-0.145486	-1.19049	-0.964318	-1.3879	-1.93703	-1.66246	0.274566	-0.00962729	-0.448066	-0.228847
26*		S	KRT81	3887		0.59286	0.838019	0.71544	-0.145427	-1.19008	-0.964082	-1.71206	-1.70507	-1.70856	0.00349381	-0.217801	-0.225188	-0.221494
42*		S	RPP25	54913		0.810509	0.620792	0.71565	-0.145299	-1.18916	-0.963566	-1.42257	-1.60518	-1.51388	0.0913044	-0.0313118	-0.257764	-0.144538
30*		S	GPX5	2880		0.788967	0.642554	0.715761	-0.145232	-1.18869	-0.963297	-1.597	-1.68369	-1.64034	0.043348	-0.23117	-0.167905	-0.199537
30*		S	GOT2	2806		0.703222	0.728371	0.715796	-0.14521	-1.18853	-0.963209	-1.66991	-1.61068	-1.64029	0.0296118	-0.294693	-0.119277	-0.206985
64*		S	FLJ43980	124149		0.814292	0.61744	0.715866	-0.145168	-1.18823	-0.963039	-1.67696	-1.62756	-1.65226	0.0247001	-0.194995	-0.163218	-0.179106
49*		S	IQCG	84223		0.674992	0.75678	0.715886	-0.145156	-1.18814	-0.96299	-1.63956	-1.43825	-1.5389	0.100657	-0.125685	-0.132099	-0.128892
38*		S	NAT9	26151		0.607955	0.823921	0.715938	-0.145125	-1.18792	-0.962863	-1.876	-1.4697	-1.67285	0.203153	-0.345886	-0.0654222	-0.205654
60*		S	FLJ39485	285603		0.740635	0.691425	0.71603	-0.145069	-1.18752	-0.962638	-1.51467	-1.54699	-1.53083	0.0161588	-0.0300204	-0.16389	-0.0969552
47*		S	TREML2	79865		0.625267	0.806845	0.716056	-0.145053	-1.18741	-0.962575	-1.72813	-1.35222	-1.54018	0.187957	-0.19944	-0.0279308	-0.113686
16*		S	CDYL	9425		0.650262	0.782111	0.716186	-0.144974	-1.18684	-0.962256	-1.88145	-1.45783	-1.66964	0.211809	-0.404577	-0.12452	-0.264548
35*		S	EMG1	10436		0.819186	0.613299	0.716243	-0.14494	-1.1866	-0.962119	-1.4533	-1.81121	-1.63226	0.178954	-0.0528567	-0.517221	-0.285039
14*		S	ABHD4	63874		0.767714	0.664812	0.716263	-0.144927	-1.18651	-0.962069	-1.73935	-1.6226	-1.68098	0.0583749	-0.395436	-0.178733	-0.287085
23*		S	COL6A1	1291		0.647311	0.785263	0.716287	-0.144913	-1.18641	-0.96201	-1.33136	-1.54091	-1.43614	0.104779	-0.0677932	-0.204354	-0.136074
30*		S	GAS6	2621		0.75081	0.681791	0.716301	-0.144905	-1.18635	-0.961977	-1.62944	-1.65031	-1.63988	0.0104347	-0.259438	-0.145671	-0.202555
62*		S	FLJ26056	375127		0.804205	0.628899	0.716552	-0.144752	-1.18526	-0.961362	-1.39659	-1.66118	-1.52889	0.132292	-0.0687354	-0.312147	-0.190441
13*		S	SHOX2	6474		0.763741	0.669418	0.71658	-0.144736	-1.18514	-0.961295	-1.67257	-1.64441	-1.65849	0.0140799	-0.217787	-0.255722	-0.236755
13*		S	MYOG	4656		0.762648	0.670576	0.716612	-0.144716	-1.185	-0.961215	-1.67353	-1.64343	-1.65848	0.0150473	-0.218517	-0.254894	-0.236705
16*		S	EDEM2	55741		0.67279	0.760706	0.716748	-0.144634	-1.18442	-0.960883	-1.86175	-1.47462	-1.66819	0.193564	-0.388932	-0.139837	-0.264384
34*		S	XAGE1D	9503		0.757506	0.67602	0.716763	-0.144624	-1.18435	-0.960846	-1.77429	-1.58067	-1.67748	0.0968143	-0.266785	-0.144013	-0.205399
69*		S	LOC388069	388069		0.769019	0.664563	0.716791	-0.144607	-1.18423	-0.960778	-1.59334	-1.96365	-1.77849	0.185158	-0.243284	-0.404847	-0.324066
29*		S	AP1G1	479		0.789437	0.644156	0.716796	-0.144604	-1.18421	-0.960764	-1.42328	-1.75353	-1.5884	0.165123	-0.00702629	-0.369445	-0.188236
27*		S	POMZP3	22932		0.678508	0.755348	0.716928	-0.144524	-1.18364	-0.960443	-1.50402	-1.60018	-1.5521	0.0480839	-0.0898025	-0.12485	-0.107326
23*		S	SLC10A2	6555		0.601476	0.832661	0.717068	-0.144439	-1.18303	-0.960099	-1.36465	-1.5006	-1.43263	0.0679746	-0.103353	-0.167382	-0.135368
59*		S	GPX6	257202		0.677961	0.756254	0.717108	-0.144416	-1.18286	-0.960004	-1.49123	-1.62324	-1.55723	0.0660045	-0.176123	-0.233667	-0.204895
15*		S	PRCP	5547		0.728141	0.70616	0.717151	-0.14439	-1.18268	-0.959899	-1.61868	-1.57198	-1.59533	0.0233503	-0.181515	-0.164625	-0.17307
67*		S	LOC389490	389490		0.880602	0.553822	0.717212	-0.144352	-1.18241	-0.959749	-1.4494	-1.9766	-1.713	0.263602	-0.0106416	-0.438521	-0.224581
68*		S	LOC389689	389689		0.778734	0.655708	0.717221	-0.144347	-1.18237	-0.959727	-1.33772	-1.64969	-1.49371	0.155982	-0.0474048	-0.151896	-0.0996504
17*		S	MIPEP	4285		0.689742	0.744816	0.717279	-0.144312	-1.18212	-0.959585	-1.78271	-1.60508	-1.6939	0.088812	-0.335321	-0.178174	-0.256748
20*		S	WNT1	7471		0.792681	0.641921	0.717301	-0.144299	-1.18203	-0.959531	-1.46796	-1.38437	-1.42617	0.0417948	-0.0496413	-0.0673537	-0.0584975
57*		S	TMEM148	197196		0.795403	0.639438	0.717421	-0.144226	-1.18151	-0.959239	-1.84762	-1.55279	-1.70021	0.147415	-0.320266	-0.217336	-0.268801
26*		S	HMG1L10	27126		0.821182	0.613892	0.717537	-0.144156	-1.18101	-0.958954	-1.50811	-1.89615	-1.70213	0.194016	-0.0713599	-0.365991	-0.218675
38*		S	CA14	23632		0.735053	0.700274	0.717664	-0.144079	-1.18046	-0.958645	-1.76621	-1.57359	-1.6699	0.0963083	-0.265762	-0.145017	-0.20539
47*		S	MRM1	79922		0.847099	0.588305	0.717702	-0.144056	-1.1803	-0.958551	-1.54261	-1.51161	-1.52711	0.0154967	-0.076981	-0.168651	-0.122816
57*		S	SAMD14	201191		0.74694	0.688611	0.717776	-0.144011	-1.17998	-0.958371	-1.89221	-1.51484	-1.70353	0.188683	-0.351547	-0.182291	-0.266919
61*		S	GEN1	348654		0.787489	0.648259	0.717874	-0.143952	-1.17955	-0.95813	-1.41271	-1.83125	-1.62198	0.209268	-0.163202	-0.393964	-0.278583
61*		S	IRGM	345611		0.641072	0.794862	0.717967	-0.143896	-1.17915	-0.957903	-1.52673	-1.70062	-1.61367	0.0869457	-0.281251	-0.285685	-0.283468
40*		S	MEMO1	51072		0.616705	0.819695	0.7182	-0.143755	-1.17815	-0.957333	-1.54936	-1.5981	-1.57373	0.024371	-0.213391	-0.166831	-0.190111
25*		S	CD244	51744		0.74403	0.692425	0.718228	-0.143738	-1.17803	-0.957266	-1.6952	-1.60194	-1.64857	0.0466326	-0.285289	-0.253825	-0.269557
12*		S	TRIP10	9322		0.792344	0.644412	0.718378	-0.143647	-1.17738	-0.956898	-1.51441	-1.49687	-1.50564	0.00876663	-0.300989	-0.0725507	-0.18677
69*		S	LOC400541	400541		0.861198	0.575828	0.718513	-0.143565	-1.1768	-0.956568	-1.51864	-2.0431	-1.78087	0.262228	-0.177028	-0.462274	-0.319651
25*		S	DFNA5	1687		0.673659	0.763553	0.718606	-0.143509	-1.1764	-0.956341	-1.7559	-1.54246	-1.64918	0.106719	-0.335737	-0.20045	-0.268094
14*		S	CLPP	8192		0.667755	0.769639	0.718697	-0.143454	-1.176	-0.956118	-1.82347	-1.54468	-1.68407	0.139395	-0.473309	-0.120406	-0.296858
32*		S	SULT1A2	6799		0.69488	0.74252	0.7187	-0.143452	-1.17599	-0.956111	-1.64358	-1.71726	-1.68042	0.0368355	-0.259002	-0.243786	-0.251394
42*		S	RMND1	55005		0.649881	0.787695	0.718788	-0.143399	-1.17561	-0.955896	-1.53783	-1.46408	-1.50095	0.0368724	-0.120354	-0.129559	-0.124957
22*		S	CRYBB3	1417		0.619448	0.818502	0.718975	-0.143286	-1.17481	-0.955439	-1.58442	-1.73595	-1.66019	0.0757645	-0.181513	-0.217753	-0.199633
30*		S	MAGEB2	4113		0.676072	0.762339	0.719206	-0.143147	-1.17381	-0.954875	-1.69299	-1.58178	-1.63739	0.0556041	-0.314807	-0.100029	-0.207418
64*		S	RAET1J	345829		0.69297	0.745499	0.719234	-0.143129	-1.17369	-0.954804	-1.7967	-1.53242	-1.66456	0.132136	-0.281268	-0.09394	-0.187604
41*		S	GIN1	54826		0.823659	0.614929	0.719294	-0.143094	-1.17343	-0.954659	-1.52666	-1.67635	-1.60151	0.0748468	-0.174162	-0.161522	-0.167842
64*		S	LOC339162	339162		0.814131	0.624499	0.719315	-0.143081	-1.17334	-0.954607	-1.67712	-1.62232	-1.64972	0.0274017	-0.19511	-0.159399	-0.177254
33*		S	WDR22	8816		0.678581	0.76048	0.71953	-0.142951	-1.17241	-0.95408	-1.73587	-1.65627	-1.69607	0.0397983	-0.301807	-0.110445	-0.206126
19*		S	MLL3	58508		0.754194	0.685032	0.719613	-0.142901	-1.17206	-0.953879	-1.59931	-1.55357	-1.57644	0.0228701	-0.144845	-0.151875	-0.14836
8*		S	GPR23	2846		0.768644	0.67059	0.719617	-0.142899	-1.17204	-0.953869	-1.47989	-1.63069	-1.55529	0.0753963	-0.100036	-0.229018	-0.164527
23*		S	VPS13A	23230		0.795885	0.643629	0.719757	-0.142814	-1.17144	-0.953527	-1.22343	-1.66138	-1.4424	0.218976	0.0474743	-0.314834	-0.13368
38*		S	TXN2	25828		0.780926	0.658624	0.719775	-0.142803	-1.17136	-0.953483	-1.72658	-1.60859	-1.66758	0.0589962	-0.236843	-0.171829	-0.204336
53*		S	CLDND2	125875		0.609827	0.829972	0.7199	-0.142728	-1.17083	-0.953178	-1.6295	-1.69595	-1.66273	0.0332219	-0.286175	-0.213304	-0.249739
24*		S	TRIM58	25893		0.638183	0.801618	0.719901	-0.142728	-1.17082	-0.953176	-1.6551	-1.39397	-1.52454	0.130568	-0.269049	-0.00822925	-0.138639
22*		S	SCARF2	91179		0.776417	0.663504	0.719961	-0.142691	-1.17056	-0.953029	-1.46215	-1.88331	-1.67273	0.210578	-0.0822558	-0.318651	-0.200454
27*		S	C11orf68	83638		0.784796	0.655236	0.720016	-0.142658	-1.17033	-0.952894	-1.418	-1.70387	-1.56093	0.14293	-0.0241335	-0.196657	-0.110395
42*		S	RIF1	55183		0.642598	0.797488	0.720043	-0.142642	-1.17021	-0.952828	-1.54305	-1.4558	-1.49943	0.0436248	-0.124391	-0.122037	-0.123214
46*		S	GMCL1L	64396		0.625354	0.814773	0.720063	-0.142629	-1.17012	-0.952777	-1.5657	-1.43066	-1.49818	0.0675169	-0.104815	-0.0818817	-0.0933483
36*		S	ZNF275	10838		0.816961	0.623198	0.720079	-0.14262	-1.17005	-0.952738	-1.54403	-1.74685	-1.64544	0.101406	-0.105133	-0.19117	-0.148152
21*		S	GDF2	2658		0.841291	0.598901	0.720096	-0.14261	-1.16998	-0.952698	-1.44102	-1.63161	-1.53631	0.095295	-0.0857603	-0.182201	-0.13398
43*		S	ELMOD1	55531		0.751754	0.688586	0.72017	-0.142565	-1.16966	-0.952517	-1.52156	-1.77075	-1.64615	0.124595	-0.0590886	-0.327885	-0.193487
43*		S	DDX60	55601		0.727849	0.712519	0.720184	-0.142557	-1.1696	-0.952483	-1.54122	-1.75076	-1.64599	0.104771	-0.0722391	-0.311752	-0.191996
38*		S	TMEM2	23670		0.788505	0.651888	0.720197	-0.142549	-1.16955	-0.952452	-1.72003	-1.61425	-1.66714	0.0528927	-0.232065	-0.176165	-0.204115
18*		S	ARHGAP5	394		0.652217	0.788181	0.720199	-0.142547	-1.16954	-0.952446	-1.8454	-1.89835	-1.87187	0.0264771	-0.179462	-0.231626	-0.205544
41*		S	MPHOSPH8	54737		0.785896	0.654515	0.720206	-0.142544	-1.16951	-0.95243	-1.55748	-1.64384	-1.60066	0.0431803	-0.201391	-0.139839	-0.170615
21*		S	GHRH	2691		0.752758	0.68788	0.720319	-0.142475	-1.16902	-0.952153	-1.51368	-1.55889	-1.53628	0.0226077	-0.148496	-0.127873	-0.138184
19*		S	BIRC2	329		0.820853	0.619806	0.720329	-0.142469	-1.16898	-0.952127	-1.54218	-1.60167	-1.57192	0.0297411	-0.10319	-0.190752	-0.146971
51*		S	LOC90520	90520		0.754326	0.686514	0.72042	-0.142414	-1.16859	-0.951906	-1.60375	-1.94508	-1.77441	0.170667	-0.129164	-0.356415	-0.242789
25*		S	CSRP3	8048		0.619781	0.821279	0.72053	-0.142348	-1.16811	-0.951637	-1.80237	-1.49419	-1.64828	0.154089	-0.374362	-0.157132	-0.265747
69*		S	LOC390031	390031		0.777821	0.663252	0.720537	-0.142344	-1.16809	-0.951621	-1.5862	-1.96482	-1.77551	0.189311	-0.236957	-0.405696	-0.321327
59*		S	FLJ25694	283492		0.725171	0.7163	0.720735	-0.142224	-1.16723	-0.951135	-1.45331	-1.65555	-1.55443	0.101118	-0.139973	-0.260207	-0.20009
40*		S	KRCC1	51315		0.841512	0.599965	0.720738	-0.142222	-1.16722	-0.951127	-1.37248	-1.78915	-1.58081	0.208334	-0.0523935	-0.312356	-0.182375
[truncated: 18,683 more rows]
