# Supplementary material for: Botulinum toxin intoxication requires retrograde transport and membrane translocation at the ER in RenVM neurons
Source: eLife. 2024 Aug 28;12:RP92806. doi: 10.7554/eLife.92806 (PMC11357346; doi:10.7554/eLife.92806)
Supplement: Supplementary file 1. — The file is separated into SV2 positive (+) and SV2 negative (-) regulators. Gene ontology analysis is included for Molecular Function, Biological Process, Cellular Component, and KEGG pathways. [file elife-92806-supp1.xlsx]

## Sheet: SV2 (+) gene list
input term	mapped gene	annotation
CALCRL	CALCRL	Calcitonin gene-related peptide type 1 receptor; Receptor for calcitonin-gene-related peptide (CGRP) together with RAMP1 and receptor for adrenomedullin together with RAMP3 (By similarity). Rece [...]
GPR141	GPR141	Probable G-protein coupled receptor 141; Orphan receptor; G protein-coupled receptors, Class A orphans
BLR1	CXCR5	C-X-C chemokine receptor type 5; Cytokine receptor that binds to B-lymphocyte chemoattractant (BLC). Involved in B-cell migration into B-cell follicles of spleen and Peyer patches but not into t [...]
GPR116	GPR116	Adhesion G protein-coupled receptor F5; Receptor that plays a critical role in lung surfactant homeostasis. May play a role in controlling adipocyte function; Belongs to the G-protein coupled re [...]
ARL3	ARL3	ADP-ribosylation factor-like protein 3; Small GTP-binding protein which cycles between an inactive GDP-bound and an active GTP-bound form, and the rate of cycling is regulated by guanine nucleot [...]
GPR10	PRLHR	Prolactin-releasing peptide receptor; Receptor for prolactin-releasing peptide (PrRP). Implicated in lactation, regulation of food intake and pain-signal processing; Belongs to the G-protein cou [...]
ADRA2C	ADRA2C	Alpha-2C adrenergic receptor; Alpha-2 adrenergic receptors mediate the catecholamine- induced inhibition of adenylate cyclase through the action of G proteins; Adrenoceptors
GNG3	GNG3	Guanine nucleotide-binding protein G(I)/G(S)/G(O) subunit gamma-3; Guanine nucleotide-binding proteins (G proteins) are involved as a modulator or transducer in various transmembrane signaling s [...]
ADMR	GPR182	G-protein coupled receptor 182; Orphan receptor; G protein-coupled receptors, Class A orphans
FZD3	FZD3	Frizzled-3; Receptor for Wnt proteins. Most of frizzled receptors are coupled to the beta-catenin canonical signaling pathway, which leads to the activation of disheveled proteins, inhibition of [...]
HTR2C	HTR2C	5-hydroxytryptamine receptor 2C; G-protein coupled receptor for 5-hydroxytryptamine (serotonin). Also functions as a receptor for various drugs and psychoactive substances, including ergot alkal [...]
GCGR	GCGR	Glucagon receptor; G-protein coupled receptor for glucagon that plays a central role in the regulation of blood glucose levels and glucose homeostasis. Regulates the rate of hepatic glucose prod [...]
OR5P3	OR5P3	Olfactory receptor 5P3; Odorant receptor (Potential). May be involved in taste perception; Olfactory receptors, family 5
GNA15	GNA15	Guanine nucleotide-binding protein subunit alpha-15; Guanine nucleotide-binding proteins (G proteins) are involved as modulators or transducers in various transmembrane signaling systems; G prot [...]
LHCGR	LHCGR	Lutropin-choriogonadotropic hormone receptor; Receptor for lutropin-choriogonadotropic hormone. The activity of this receptor is mediated by G proteins which activate adenylate cyclase; Glycopro [...]
GNB3	GNB3	Guanine nucleotide-binding protein G(I)/G(S)/G(T) subunit beta-3; Guanine nucleotide-binding proteins (G proteins) are involved as a modulator or transducer in various transmembrane signaling sy [...]
GPR50	GPR50	Melatonin-related receptor; Does not bind melatonin; G protein-coupled receptors, Class A orphans
CNR1	CNR1	Cannabinoid receptor 1; G-protein coupled receptor for endogenous cannabinoids (eCBs), including N-arachidonoylethanolamide (also called anandamide or AEA) and 2-arachidonoylglycerol (2-AG), as [...]
GPR39	GPR39	G-protein coupled receptor 39; Zn(2+) acts as an agonist. This receptor mediates its action by association with G proteins that activate a phosphatidylinositol-calcium second messenger system. I [...]
CCRL2	CCRL2	C-C chemokine receptor-like 2; Receptor for CCL19 and chemerin/RARRES2. Does not appear to be a signaling receptor, but may have a role in modulating chemokine-triggered immune responses by capt [...]
GPR26	GPR26	G-protein coupled receptor 26; Orphan receptor. Displays a significant level of constitutive activity. Its effect is mediated by G(s)-alpha protein that stimulate adenylate cyclase, resulting in [...]
CCR1	CCR1	C-C chemokine receptor type 1; Receptor for a C-C type chemokine. Binds to MIP-1-alpha, MIP-1-delta, RANTES, and MCP-3 and, less efficiently, to MIP-1- beta or MCP-1 and subsequently transduces [...]
GPR17	GPR17	Uracil nucleotide/cysteinyl leukotriene receptor; Dual specificity receptor for uracil nucleotides and cysteinyl leukotrienes (CysLTs). Signals through G(i) and inhibition of adenylyl cyclase. M [...]
RabGAP1	RABGAP1	Rab GTPase-activating protein 1; May act as a GTPase-activating protein of RAB6A. May play a role in microtubule nucleation by centrosome. May participate in a RAB6A-mediated pathway involved in [...]
ENTPD8	ENTPD8	Ectonucleoside triphosphate diphosphohydrolase 8; Canalicular ectonucleoside NTPDase responsible for the main hepatic NTPDase activity. Ectonucleoside NTPDases catalyze the hydrolysis of gamma- [...]
ENTPD7	ENTPD7	Ectonucleoside triphosphate diphosphohydrolase 7; Preferentially hydrolyzes nucleoside 5'-triphosphates. The order of activity with respect to possible substrates is UTP > GTP > CTP
NUDT15	NUDT15	Nucleotide triphosphate diphosphatase NUDT15; May catalyze the hydrolysis of nucleoside triphosphates including dGTP, dTTP, dCTP, their oxidized forms like 8-oxo-dGTP and the prodrug thiopurine [...]
TBC1D17	TBC1D17	TBC1 domain family member 17; Probable GTPase-activating protein for Rab8; its transient association with Rab8 is mediated by OPTN. Inhibits Rab8-mediated endocytic trafficking, such as of trans [...]
TBC1D2	TBC1D2	TBC1 domain family member 2A; Acts as GTPase-activating protein for RAB7A. Signal effector acting as a linker between RAC1 and RAB7A, leading to RAB7A inactivation and subsequent inhibition of c [...]
TMED5	TMED5	Transmembrane emp24 domain-containing protein 5; Potential role in vesicular protein trafficking, mainly in the early secretory pathway. Required for the maintenance of the Golgi apparatus; invo [...]
CORO1C	CORO1C	Coronin-1C; May be involved in cytokinesis, motility, and signal transduction; Belongs to the WD repeat coronin family
Rab10	RAB10	Ras-related protein Rab-10; The small GTPases Rab are key regulators of intracellular membrane trafficking, from the formation of transport vesicles to their fusion with membranes. Rabs cycle be [...]
Rab4	RAB4A	Ras-related protein Rab-4A; Protein transport. Probably involved in vesicular traffic (By similarity); RAB, member RAS oncogene GTPases
PDPK1	PDPK1	3-phosphoinositide-dependent protein kinase 1; Serine/threonine kinase which acts as a master kinase, phosphorylating and activating a subgroup of the AGC family of protein kinases. Its targets [...]
AKT1	AKT1	RAC-alpha serine/threonine-protein kinase; AKT1 is one of 3 closely related serine/threonine- protein kinases (AKT1, AKT2 and AKT3) called the AKT kinase, and which regulate many processes inclu [...]
FRAP1	MTOR	Serine/threonine-protein kinase mTOR; Serine/threonine protein kinase which is a central regulator of cellular metabolism, growth and survival in response to hormones, growth factors, nutrients, [...]
Rab11RIP2	- -	- -
Rab11FIP3	RAB11FIP3	Rab11 family-interacting protein 3; Acts as a regulator of endocytic traffic by participating in membrane delivery. Required for the abcission step in cytokinesis, possibly by acting as an 'addr [...]
SNAP25	SNAP25	Synaptosomal-associated protein 25; t-SNARE involved in the molecular regulation of neurotransmitter release. May play an important role in the synaptic function of specific neuronal systems. As [...]
Rac1	RAC1	Ras-related C3 botulinum toxin substrate 1; Plasma membrane-associated small GTPase which cycles between active GTP-bound and inactive GDP-bound states. In its active state, binds to a variety o [...]
DMN2	- -	- -
PTPN11	PTPN11	Tyrosine-protein phosphatase non-receptor type 11; Acts downstream of various receptor and cytoplasmic protein tyrosine kinases to participate in the signal transduction from the cell surface to [...]
NF2	NF2	Merlin; Probable regulator of the Hippo/SWH (Sav/Wts/Hpo) signaling pathway, a signaling pathway that plays a pivotal role in tumor suppression by restricting proliferation and promoting apoptos [...]
ARF1	ARF1	ADP-ribosylation factor 1; GTP-binding protein that functions as an allosteric activator of the cholera toxin catalytic subunit, an ADP- ribosyltransferase. Involved in protein trafficking among [...]
MYO1B	MYO1B	Unconventional myosin-Ib; Motor protein that may participate in process critical to neuronal development and function such as cell migration, neurite outgrowth and vesicular transport; Myosins, [...]
OSBPL1A	OSBPL1A	Oxysterol-binding protein-related protein 1; Binds phospholipids; exhibits strong binding to phosphatidic acid and weak binding to phosphatidylinositol 3- phosphate (By similarity). Stabilizes G [...]
MYH1	MYH1	Myosin-1; Muscle contraction; Belongs to the TRAFAC class myosin-kinesin ATPase superfamily. Myosin family
Myo10	MYO10	Unconventional myosin-X; Myosins are actin-based motor molecules with ATPase activity. Unconventional myosins serve in intracellular movements. MYO10 binds to actin filaments and actin bundles a [...]
MYO9B	MYO9B	Unconventional myosin-IXb; Myosins are actin-based motor molecules with ATPase activity. Unconventional myosins serve in intracellular movements. Binds actin with high affinity both in the absen [...]
RGS14	RGS14	Regulator of G-protein signaling 14; Regulates G protein-coupled receptor signaling cascades. Inhibits signal transduction by increasing the GTPase activity of G protein alpha subunits, thereby [...]
RGS7	RGS7	Regulator of G-protein signaling 7; Regulates G protein-coupled receptor signaling cascades. Inhibits signal transduction by increasing the GTPase activity of G protein alpha subunits, thereby d [...]
SREB3	GPR173	Probable G-protein coupled receptor 173; Orphan receptor; G protein-coupled receptors, Class A orphans
TACR3	TACR3	Neuromedin-K receptor; This is a receptor for the tachykinin neuropeptide neuromedin-K (neurokinin B). It is associated with G proteins that activate a phosphatidylinositol-calcium second messen [...]
OR3A1	OR3A1	Olfactory receptor 3A1; Odorant receptor; Olfactory receptors, family 3
OR2B2	OR2B2	Olfactory receptor 2B2; Odorant receptor; Olfactory receptors, family 2
OR1A2	OR1A2	Olfactory receptor 1A2; Odorant receptor; Olfactory receptors, family 1
OPRK1	OPRK1	Kappa-type opioid receptor; G-protein coupled opioid receptor that functions as receptor for endogenous alpha-neoendorphins and dynorphins, but has low affinity for beta-endorphins. Also functio [...]
VN1R5	- -	- -
NPY2R	NPY2R	Neuropeptide Y receptor type 2; Receptor for neuropeptide Y and peptide YY. The rank order of affinity of this receptor for pancreatic polypeptides is PYY > NPY > PYY (3-36) > NPY (2-36) > [Ile- [...]
TRHR	TRHR	Thyrotropin-releasing hormone receptor; Receptor for thyrotropin-releasing hormone. This receptor is mediated by G proteins which activate a phosphatidylinositol-calcium second messenger system; [...]
KIF3C	KIF3C	Kinesin-like protein KIF3C; Microtubule-based anterograde translocator for membranous organelles; Kinesins
DCTN1	DCTN1	Dynactin subunit 1; Plays a key role in dynein-mediated retrograde transport of vesicles and organelles along microtubules by recruiting and tethering dynein to microtubules. Binds to both dynei [...]
Rab8a	RAB8A	Ras-related protein Rab-8A; The small GTPases Rab are key regulators of intracellular membrane trafficking, from the formation of transport vesicles to their fusion with membranes. Rabs cycle be [...]
ARL8C	- -	- -
VAMP2	VAMP2	Vesicle-associated membrane protein 2; Involved in the targeting and/or fusion of transport vesicles to their target membrane. Modulates the gating characteristics of the delayed rectifier volta [...]
Rab11b	RAB11B	Ras-related protein Rab-11B; The small GTPases Rab are key regulators of intracellular membrane trafficking, from the formation of transport vesicles to their fusion with membranes. Rabs cycle b [...]
SNX26	ARHGAP33	Rho GTPase-activating protein 33; May be involved in several stages of intracellular trafficking. Could play an important role in the regulation of glucose transport by insulin. May act as a dow [...]

## Sheet: SV2 (+) Biological Process
#term ID	term description	observed gene count	background gene count	strength	false discovery rate	matching proteins in your network (IDs)	matching proteins in your network (labels)
GO:0007186	G protein-coupled receptor signaling pathway	33	1247	0.91	1.46e-19	9606.ENSP00000218316,9606.ENSP00000229264,9606.ENSP00000239032,9606.ENSP00000262958,9606.ENSP00000265572,9606.ENSP00000276198,9606.ENSP00000283296,9606.ENSP00000284674,9606.ENSP00000292174,9606.ENSP00000294117,9606.ENSP00000294954,9606.ENSP00000296140,9606.ENSP00000300098,9606.ENSP00000303325,9606.ENSP00000304419,9606.ENSP00000313803,9606.ENSP00000327417,9606.ENSP00000331600,9606.ENSP00000332068,…	GPR50,GNB3,PRLHR,GNA15,OPRK1,HTR2C,GPR116,GPR26,CXCR5,GNG3,LHCGR,CCR1,GPR182,TACR3,OR2B2,OR3A1,GPR39,GPR173,OR5P3,NPY2R,RAC1,CCRL2,RGS7,CNR1,OR1A2,GCGR,ADRA2C,CALCRL,GPR141,TRHR,FZD3,GPR17,AKT1
GO:0007154	cell communication	49	5219	0.46	5.33e-14	9606.ENSP00000218316,9606.ENSP00000229264,9606.ENSP00000239032,9606.ENSP00000254976,9606.ENSP00000258662,9606.ENSP00000260746,9606.ENSP00000262958,9606.ENSP00000265572,9606.ENSP00000276198,9606.ENSP00000283296,9606.ENSP00000284674,9606.ENSP00000292174,9606.ENSP00000294117,9606.ENSP00000294954,9606.ENSP00000296140,9606.ENSP00000300098,9606.ENSP00000303325,9606.ENSP00000304419,9606.ENSP00000313803,…	GPR50,GNB3,PRLHR,SNAP25,NUDT15,ARL3,GNA15,OPRK1,HTR2C,GPR116,GPR26,CXCR5,GNG3,LHCGR,CCR1,GPR182,TACR3,OR2B2,OR3A1,VAMP2,ARHGAP33,GPR39,GPR173,OR5P3,NPY2R,RAB11B,PTPN11,PDPK1,RAC1,CCRL2,MTOR,DCTN1,RGS7,RAB4A,CNR1,OR1A2,GCGR,ADRA2C,RGS14,CALCRL,GPR141,CORO1C,MYO10,TRHR,FZD3,ARF1,GPR17,AKT1,MYO9B
GO:0023052	signaling	48	5108	0.47	1.28e-13	9606.ENSP00000218316,9606.ENSP00000229264,9606.ENSP00000239032,9606.ENSP00000254976,9606.ENSP00000260746,9606.ENSP00000262958,9606.ENSP00000265572,9606.ENSP00000276198,9606.ENSP00000283296,9606.ENSP00000284674,9606.ENSP00000292174,9606.ENSP00000294117,9606.ENSP00000294954,9606.ENSP00000296140,9606.ENSP00000300098,9606.ENSP00000303325,9606.ENSP00000304419,9606.ENSP00000313803,9606.ENSP00000314214,…	GPR50,GNB3,PRLHR,SNAP25,ARL3,GNA15,OPRK1,HTR2C,GPR116,GPR26,CXCR5,GNG3,LHCGR,CCR1,GPR182,TACR3,OR2B2,OR3A1,VAMP2,ARHGAP33,GPR39,GPR173,OR5P3,NPY2R,RAB11B,PTPN11,PDPK1,RAC1,CCRL2,MTOR,DCTN1,RGS7,RAB4A,CNR1,OR1A2,GCGR,ADRA2C,RGS14,CALCRL,GPR141,CORO1C,MYO10,TRHR,FZD3,ARF1,GPR17,AKT1,MYO9B
GO:0007165	signal transduction	45	4738	0.47	2.49e-12	9606.ENSP00000218316,9606.ENSP00000229264,9606.ENSP00000239032,9606.ENSP00000260746,9606.ENSP00000262958,9606.ENSP00000265572,9606.ENSP00000276198,9606.ENSP00000283296,9606.ENSP00000284674,9606.ENSP00000292174,9606.ENSP00000294117,9606.ENSP00000294954,9606.ENSP00000296140,9606.ENSP00000300098,9606.ENSP00000303325,9606.ENSP00000304419,9606.ENSP00000313803,9606.ENSP00000320038,9606.ENSP00000327417,…	GPR50,GNB3,PRLHR,ARL3,GNA15,OPRK1,HTR2C,GPR116,GPR26,CXCR5,GNG3,LHCGR,CCR1,GPR182,TACR3,OR2B2,OR3A1,ARHGAP33,GPR39,GPR173,OR5P3,NPY2R,PTPN11,PDPK1,RAC1,CCRL2,MTOR,DCTN1,RGS7,RAB4A,CNR1,OR1A2,GCGR,ADRA2C,RGS14,CALCRL,GPR141,CORO1C,MYO10,TRHR,FZD3,ARF1,GPR17,AKT1,MYO9B
GO:0051716	cellular response to stimulus	50	6212	0.4	5.11e-12	9606.ENSP00000218316,9606.ENSP00000229264,9606.ENSP00000239032,9606.ENSP00000258662,9606.ENSP00000260746,9606.ENSP00000262958,9606.ENSP00000264710,9606.ENSP00000265572,9606.ENSP00000276198,9606.ENSP00000283296,9606.ENSP00000284674,9606.ENSP00000292174,9606.ENSP00000294117,9606.ENSP00000294954,9606.ENSP00000296140,9606.ENSP00000300098,9606.ENSP00000300935,9606.ENSP00000303325,9606.ENSP00000304419,…	GPR50,GNB3,PRLHR,NUDT15,ARL3,GNA15,RAB10,OPRK1,HTR2C,GPR116,GPR26,CXCR5,GNG3,LHCGR,CCR1,GPR182,RAB8A,TACR3,OR2B2,OR3A1,VAMP2,ARHGAP33,GPR39,GPR173,OR5P3,NPY2R,RAB11B,PTPN11,PDPK1,RAC1,CCRL2,MTOR,DCTN1,RGS7,RAB4A,CNR1,OR1A2,GCGR,ADRA2C,RGS14,CALCRL,GPR141,CORO1C,MYO10,TRHR,FZD3,ARF1,GPR17,AKT1,MYO9B
GO:0050896	response to stimulus	51	7824	0.31	1.4e-08	9606.ENSP00000218316,9606.ENSP00000229264,9606.ENSP00000239032,9606.ENSP00000254976,9606.ENSP00000258662,9606.ENSP00000260746,9606.ENSP00000262958,9606.ENSP00000264710,9606.ENSP00000265572,9606.ENSP00000276198,9606.ENSP00000283296,9606.ENSP00000284674,9606.ENSP00000292174,9606.ENSP00000294117,9606.ENSP00000294954,9606.ENSP00000296140,9606.ENSP00000300098,9606.ENSP00000300935,9606.ENSP00000303325,…	GPR50,GNB3,PRLHR,SNAP25,NUDT15,ARL3,GNA15,RAB10,OPRK1,HTR2C,GPR116,GPR26,CXCR5,GNG3,LHCGR,CCR1,GPR182,RAB8A,TACR3,OR2B2,OR3A1,VAMP2,ARHGAP33,GPR39,GPR173,OR5P3,NPY2R,RAB11B,PTPN11,PDPK1,RAC1,CCRL2,MTOR,DCTN1,RGS7,RAB4A,CNR1,OR1A2,GCGR,ADRA2C,RGS14,CALCRL,GPR141,CORO1C,MYO10,TRHR,FZD3,ARF1,GPR17,AKT1,MYO9B
GO:0007187	G protein-coupled receptor signaling pathway, coupled to cyclic nucleotide second messenger	10	206	1.18	5.28e-07	9606.ENSP00000262958,9606.ENSP00000265572,9606.ENSP00000284674,9606.ENSP00000294954,9606.ENSP00000296140,9606.ENSP00000332591,9606.ENSP00000358513,9606.ENSP00000383558,9606.ENSP00000386069,9606.ENSP00000386972	GNA15,OPRK1,GPR26,LHCGR,CCR1,NPY2R,CNR1,GCGR,ADRA2C,CALCRL
GO:0050794	regulation of cellular process	56	10484	0.22	5.97e-07	9606.ENSP00000218316,9606.ENSP00000221543,9606.ENSP00000229264,9606.ENSP00000239032,9606.ENSP00000254976,9606.ENSP00000258662,9606.ENSP00000260746,9606.ENSP00000262305,9606.ENSP00000262958,9606.ENSP00000264710,9606.ENSP00000265572,9606.ENSP00000276198,9606.ENSP00000283296,9606.ENSP00000284674,9606.ENSP00000292174,9606.ENSP00000294117,9606.ENSP00000294954,9606.ENSP00000296140,9606.ENSP00000300098,…	GPR50,TBC1D17,GNB3,PRLHR,SNAP25,NUDT15,ARL3,RAB11FIP3,GNA15,RAB10,OPRK1,HTR2C,GPR116,GPR26,CXCR5,GNG3,LHCGR,CCR1,GPR182,RAB8A,TACR3,OR2B2,OR3A1,VAMP2,ARHGAP33,GPR39,GPR173,OR5P3,NPY2R,RAB11B,PTPN11,PDPK1,NF2,RAC1,CCRL2,MTOR,DCTN1,RGS7,RAB4A,CNR1,RABGAP1,OR1A2,GCGR,ADRA2C,RGS14,CALCRL,GPR141,CORO1C,MYO10,TRHR,FZD3,ARF1,GPR17,AKT1,MYO9B,TBC1D2
GO:0007188	adenylate cyclase-modulating G protein-coupled receptor signaling pathway	9	183	1.18	2.58e-06	9606.ENSP00000262958,9606.ENSP00000265572,9606.ENSP00000284674,9606.ENSP00000294954,9606.ENSP00000332591,9606.ENSP00000358513,9606.ENSP00000383558,9606.ENSP00000386069,9606.ENSP00000386972	GNA15,OPRK1,GPR26,LHCGR,NPY2R,CNR1,GCGR,ADRA2C,CALCRL
GO:0051049	regulation of transport	22	1732	0.6	2.58e-06	9606.ENSP00000221543,9606.ENSP00000254976,9606.ENSP00000262305,9606.ENSP00000264710,9606.ENSP00000265572,9606.ENSP00000276198,9606.ENSP00000296140,9606.ENSP00000300935,9606.ENSP00000314214,9606.ENSP00000332591,9606.ENSP00000333547,9606.ENSP00000340944,9606.ENSP00000344220,9606.ENSP00000348461,9606.ENSP00000354558,9606.ENSP00000355651,9606.ENSP00000358513,9606.ENSP00000362751,9606.ENSP00000386069,…	TBC1D17,SNAP25,RAB11FIP3,RAB10,OPRK1,HTR2C,CCR1,RAB8A,VAMP2,NPY2R,RAB11B,PTPN11,PDPK1,RAC1,MTOR,RAB4A,CNR1,RABGAP1,ADRA2C,ARF1,AKT1,TBC1D2
GO:0032879	regulation of localization	26	2524	0.51	4.51e-06	9606.ENSP00000221543,9606.ENSP00000254976,9606.ENSP00000262305,9606.ENSP00000264710,9606.ENSP00000265572,9606.ENSP00000276198,9606.ENSP00000296140,9606.ENSP00000300935,9606.ENSP00000303325,9606.ENSP00000314214,9606.ENSP00000331600,9606.ENSP00000332591,9606.ENSP00000333547,9606.ENSP00000340944,9606.ENSP00000344220,9606.ENSP00000344666,9606.ENSP00000348461,9606.ENSP00000354558,9606.ENSP00000355651,…	TBC1D17,SNAP25,RAB11FIP3,RAB10,OPRK1,HTR2C,CCR1,RAB8A,TACR3,VAMP2,GPR173,NPY2R,RAB11B,PTPN11,PDPK1,NF2,RAC1,MTOR,RAB4A,CNR1,RABGAP1,ADRA2C,CORO1C,ARF1,AKT1,TBC1D2
GO:0060259	regulation of feeding behavior	5	25	1.79	6.79e-06	9606.ENSP00000265572,9606.ENSP00000303325,9606.ENSP00000332591,9606.ENSP00000354558,9606.ENSP00000358513	OPRK1,TACR3,NPY2R,MTOR,CNR1
GO:0065008	regulation of biological quality	30	3559	0.42	1.6e-05	9606.ENSP00000229264,9606.ENSP00000239032,9606.ENSP00000254976,9606.ENSP00000262305,9606.ENSP00000262958,9606.ENSP00000265572,9606.ENSP00000276198,9606.ENSP00000283296,9606.ENSP00000294117,9606.ENSP00000296140,9606.ENSP00000300935,9606.ENSP00000303325,9606.ENSP00000314214,9606.ENSP00000320038,9606.ENSP00000332591,9606.ENSP00000333547,9606.ENSP00000340944,9606.ENSP00000344220,9606.ENSP00000344666,…	GNB3,PRLHR,SNAP25,RAB11FIP3,GNA15,OPRK1,HTR2C,GPR116,GNG3,CCR1,RAB8A,TACR3,VAMP2,ARHGAP33,NPY2R,RAB11B,PTPN11,PDPK1,NF2,RAC1,MTOR,DCTN1,CNR1,GCGR,ADRA2C,RGS14,MYO10,ARF1,GPR17,AKT1
GO:0009987	cellular process	62	14652	0.12	4.2e-05	9606.ENSP00000218316,9606.ENSP00000221543,9606.ENSP00000226207,9606.ENSP00000229264,9606.ENSP00000239032,9606.ENSP00000254976,9606.ENSP00000258662,9606.ENSP00000260746,9606.ENSP00000262305,9606.ENSP00000262958,9606.ENSP00000264710,9606.ENSP00000264712,9606.ENSP00000265572,9606.ENSP00000276198,9606.ENSP00000283296,9606.ENSP00000284674,9606.ENSP00000292174,9606.ENSP00000294117,9606.ENSP00000294954,…	GPR50,TBC1D17,MYH1,GNB3,PRLHR,SNAP25,NUDT15,ARL3,RAB11FIP3,GNA15,RAB10,KIF3C,OPRK1,HTR2C,GPR116,GPR26,CXCR5,GNG3,LHCGR,CCR1,GPR182,RAB8A,TACR3,OR2B2,OR3A1,VAMP2,ARHGAP33,OSBPL1A,GPR39,GPR173,OR5P3,NPY2R,RAB11B,PTPN11,PDPK1,NF2,RAC1,CCRL2,MTOR,DCTN1,RGS7,RAB4A,CNR1,TMED5,ENTPD7,ENTPD8,RABGAP1,OR1A2,MYO1B,GCGR,ADRA2C,RGS14,CALCRL,GPR141,CORO1C,MYO10,TRHR,FZD3,ARF1,GPR17,AKT1,MYO9B
GO:0043434	response to peptide hormone	10	362	0.93	4.2e-05	9606.ENSP00000264710,9606.ENSP00000265572,9606.ENSP00000294954,9606.ENSP00000300935,9606.ENSP00000314214,9606.ENSP00000331600,9606.ENSP00000344220,9606.ENSP00000354558,9606.ENSP00000383558,9606.ENSP00000451828	RAB10,OPRK1,LHCGR,RAB8A,VAMP2,GPR173,PDPK1,MTOR,GCGR,AKT1
GO:0060627	regulation of vesicle-mediated transport	11	480	0.85	5.46e-05	9606.ENSP00000221543,9606.ENSP00000264710,9606.ENSP00000300935,9606.ENSP00000314214,9606.ENSP00000333547,9606.ENSP00000344220,9606.ENSP00000348461,9606.ENSP00000355651,9606.ENSP00000362751,9606.ENSP00000440005,9606.ENSP00000481721	TBC1D17,RAB10,RAB8A,VAMP2,RAB11B,PDPK1,RAC1,RAB4A,RABGAP1,ARF1,TBC1D2
GO:0048878	chemical homeostasis	15	995	0.67	6.05e-05	9606.ENSP00000262958,9606.ENSP00000265572,9606.ENSP00000276198,9606.ENSP00000283296,9606.ENSP00000294117,9606.ENSP00000296140,9606.ENSP00000332591,9606.ENSP00000333547,9606.ENSP00000340944,9606.ENSP00000344220,9606.ENSP00000358513,9606.ENSP00000383558,9606.ENSP00000440005,9606.ENSP00000442982,9606.ENSP00000451828	GNA15,OPRK1,HTR2C,GPR116,GNG3,CCR1,NPY2R,RAB11B,PTPN11,PDPK1,CNR1,GCGR,ARF1,GPR17,AKT1
GO:0051345	positive regulation of hydrolase activity	13	742	0.74	7.32e-05	9606.ENSP00000221543,9606.ENSP00000262958,9606.ENSP00000320038,9606.ENSP00000344220,9606.ENSP00000354558,9606.ENSP00000355523,9606.ENSP00000355651,9606.ENSP00000362751,9606.ENSP00000386229,9606.ENSP00000394496,9606.ENSP00000451828,9606.ENSP00000471457,9606.ENSP00000481721	TBC1D17,GNA15,ARHGAP33,PDPK1,MTOR,RGS7,RAB4A,RABGAP1,RGS14,CORO1C,AKT1,MYO9B,TBC1D2
GO:0042592	homeostatic process	18	1491	0.57	7.88e-05	9606.ENSP00000229264,9606.ENSP00000262958,9606.ENSP00000265572,9606.ENSP00000276198,9606.ENSP00000283296,9606.ENSP00000294117,9606.ENSP00000296140,9606.ENSP00000332591,9606.ENSP00000333547,9606.ENSP00000340944,9606.ENSP00000344220,9606.ENSP00000348461,9606.ENSP00000354791,9606.ENSP00000358513,9606.ENSP00000383558,9606.ENSP00000440005,9606.ENSP00000442982,9606.ENSP00000451828	GNB3,GNA15,OPRK1,HTR2C,GPR116,GNG3,CCR1,NPY2R,RAB11B,PTPN11,PDPK1,RAC1,DCTN1,CNR1,GCGR,ARF1,GPR17,AKT1
GO:0042221	response to chemical	31	4153	0.37	8.88e-05	9606.ENSP00000258662,9606.ENSP00000262958,9606.ENSP00000264710,9606.ENSP00000265572,9606.ENSP00000276198,9606.ENSP00000292174,9606.ENSP00000294954,9606.ENSP00000296140,9606.ENSP00000300935,9606.ENSP00000303325,9606.ENSP00000304419,9606.ENSP00000313803,9606.ENSP00000314214,9606.ENSP00000320038,9606.ENSP00000331600,9606.ENSP00000332068,9606.ENSP00000333547,9606.ENSP00000340944,9606.ENSP00000344220,…	NUDT15,GNA15,RAB10,OPRK1,HTR2C,CXCR5,LHCGR,CCR1,RAB8A,TACR3,OR2B2,OR3A1,VAMP2,ARHGAP33,GPR173,OR5P3,RAB11B,PTPN11,PDPK1,RAC1,CCRL2,MTOR,DCTN1,CNR1,OR1A2,GCGR,CALCRL,FZD3,ARF1,GPR17,AKT1
GO:0016192	vesicle-mediated transport	19	1699	0.54	0.0001	9606.ENSP00000221543,9606.ENSP00000254976,9606.ENSP00000260746,9606.ENSP00000262305,9606.ENSP00000264710,9606.ENSP00000264712,9606.ENSP00000296140,9606.ENSP00000300935,9606.ENSP00000314214,9606.ENSP00000320291,9606.ENSP00000333547,9606.ENSP00000348461,9606.ENSP00000354791,9606.ENSP00000376132,9606.ENSP00000383558,9606.ENSP00000386972,9606.ENSP00000394496,9606.ENSP00000421280,9606.ENSP00000440005	TBC1D17,SNAP25,ARL3,RAB11FIP3,RAB10,KIF3C,CCR1,RAB8A,VAMP2,OSBPL1A,RAB11B,RAC1,DCTN1,MYO1B,GCGR,CALCRL,CORO1C,MYO10,ARF1
GO:0043085	positive regulation of catalytic activity	17	1381	0.58	0.00012	9606.ENSP00000221543,9606.ENSP00000262958,9606.ENSP00000294117,9606.ENSP00000294954,9606.ENSP00000320038,9606.ENSP00000340944,9606.ENSP00000344220,9606.ENSP00000354558,9606.ENSP00000355523,9606.ENSP00000355651,9606.ENSP00000362751,9606.ENSP00000386069,9606.ENSP00000386229,9606.ENSP00000394496,9606.ENSP00000451828,9606.ENSP00000471457,9606.ENSP00000481721	TBC1D17,GNA15,GNG3,LHCGR,ARHGAP33,PTPN11,PDPK1,MTOR,RGS7,RAB4A,RABGAP1,ADRA2C,RGS14,CORO1C,AKT1,MYO9B,TBC1D2
GO:0042593	glucose homeostasis	7	169	1.11	0.00013	9606.ENSP00000265572,9606.ENSP00000283296,9606.ENSP00000333547,9606.ENSP00000340944,9606.ENSP00000358513,9606.ENSP00000383558,9606.ENSP00000451828	OPRK1,GPR116,RAB11B,PTPN11,CNR1,GCGR,AKT1
GO:0071375	cellular response to peptide hormone stimulus	8	245	1.01	0.00013	9606.ENSP00000264710,9606.ENSP00000294954,9606.ENSP00000300935,9606.ENSP00000314214,9606.ENSP00000331600,9606.ENSP00000344220,9606.ENSP00000383558,9606.ENSP00000451828	RAB10,LHCGR,RAB8A,VAMP2,GPR173,PDPK1,GCGR,AKT1
GO:1903530	regulation of secretion by cell	12	672	0.74	0.00013	9606.ENSP00000254976,9606.ENSP00000262305,9606.ENSP00000264710,9606.ENSP00000265572,9606.ENSP00000276198,9606.ENSP00000300935,9606.ENSP00000314214,9606.ENSP00000332591,9606.ENSP00000340944,9606.ENSP00000344220,9606.ENSP00000358513,9606.ENSP00000386069	SNAP25,RAB11FIP3,RAB10,OPRK1,HTR2C,RAB8A,VAMP2,NPY2R,PTPN11,PDPK1,CNR1,ADRA2C
GO:0045184	establishment of protein localization	17	1467	0.56	0.00021	9606.ENSP00000221543,9606.ENSP00000254976,9606.ENSP00000260746,9606.ENSP00000264710,9606.ENSP00000264712,9606.ENSP00000300935,9606.ENSP00000314214,9606.ENSP00000320038,9606.ENSP00000333547,9606.ENSP00000355651,9606.ENSP00000359305,9606.ENSP00000362751,9606.ENSP00000386972,9606.ENSP00000394496,9606.ENSP00000440005,9606.ENSP00000451828,9606.ENSP00000481721	TBC1D17,SNAP25,ARL3,RAB10,KIF3C,RAB8A,VAMP2,ARHGAP33,RAB11B,RAB4A,TMED5,RABGAP1,CALCRL,CORO1C,ARF1,AKT1,TBC1D2
GO:0009725	response to hormone	13	854	0.67	0.00022	9606.ENSP00000262958,9606.ENSP00000264710,9606.ENSP00000265572,9606.ENSP00000294954,9606.ENSP00000300935,9606.ENSP00000303325,9606.ENSP00000314214,9606.ENSP00000331600,9606.ENSP00000340944,9606.ENSP00000344220,9606.ENSP00000354558,9606.ENSP00000383558,9606.ENSP00000451828	GNA15,RAB10,OPRK1,LHCGR,RAB8A,TACR3,VAMP2,GPR173,PTPN11,PDPK1,MTOR,GCGR,AKT1
GO:0098876	vesicle-mediated transport to the plasma membrane	5	66	1.37	0.00023	9606.ENSP00000254976,9606.ENSP00000264710,9606.ENSP00000300935,9606.ENSP00000314214,9606.ENSP00000333547	SNAP25,RAB10,RAB8A,VAMP2,RAB11B
GO:0032148	activation of protein kinase B activity	4	32	1.59	0.00031	9606.ENSP00000344220,9606.ENSP00000354558,9606.ENSP00000386069,9606.ENSP00000451828	PDPK1,MTOR,ADRA2C,AKT1
GO:0035556	intracellular signal transduction	17	1528	0.54	0.00031	9606.ENSP00000260746,9606.ENSP00000284674,9606.ENSP00000294954,9606.ENSP00000300098,9606.ENSP00000320038,9606.ENSP00000332591,9606.ENSP00000344220,9606.ENSP00000348461,9606.ENSP00000354558,9606.ENSP00000355523,9606.ENSP00000355651,9606.ENSP00000383558,9606.ENSP00000386069,9606.ENSP00000386229,9606.ENSP00000386972,9606.ENSP00000451828,9606.ENSP00000471457	ARL3,GPR26,LHCGR,GPR182,ARHGAP33,NPY2R,PDPK1,RAC1,MTOR,RGS7,RAB4A,GCGR,ADRA2C,RGS14,CALCRL,AKT1,MYO9B
GO:0043278	response to morphine	4	32	1.59	0.00031	9606.ENSP00000265572,9606.ENSP00000303325,9606.ENSP00000354558,9606.ENSP00000358513	OPRK1,TACR3,MTOR,CNR1
GO:1901701	cellular response to oxygen-containing compound	13	896	0.65	0.00031	9606.ENSP00000262958,9606.ENSP00000264710,9606.ENSP00000265572,9606.ENSP00000294954,9606.ENSP00000300935,9606.ENSP00000314214,9606.ENSP00000331600,9606.ENSP00000333547,9606.ENSP00000344220,9606.ENSP00000354558,9606.ENSP00000383558,9606.ENSP00000386972,9606.ENSP00000451828	GNA15,RAB10,OPRK1,LHCGR,RAB8A,VAMP2,GPR173,RAB11B,PDPK1,MTOR,GCGR,CALCRL,AKT1
GO:0010817	regulation of hormone levels	10	511	0.78	0.00032	9606.ENSP00000229264,9606.ENSP00000239032,9606.ENSP00000254976,9606.ENSP00000262305,9606.ENSP00000265572,9606.ENSP00000276198,9606.ENSP00000333547,9606.ENSP00000340944,9606.ENSP00000358513,9606.ENSP00000386069	GNB3,PRLHR,SNAP25,RAB11FIP3,OPRK1,HTR2C,RAB11B,PTPN11,CNR1,ADRA2C
GO:0015031	protein transport	16	1391	0.55	0.00034	9606.ENSP00000221543,9606.ENSP00000254976,9606.ENSP00000260746,9606.ENSP00000264710,9606.ENSP00000264712,9606.ENSP00000300935,9606.ENSP00000314214,9606.ENSP00000320038,9606.ENSP00000333547,9606.ENSP00000355651,9606.ENSP00000359305,9606.ENSP00000362751,9606.ENSP00000386972,9606.ENSP00000440005,9606.ENSP00000451828,9606.ENSP00000481721	TBC1D17,SNAP25,ARL3,RAB10,KIF3C,RAB8A,VAMP2,ARHGAP33,RAB11B,RAB4A,TMED5,RABGAP1,CALCRL,ARF1,AKT1,TBC1D2
GO:0032868	response to insulin	7	213	1.01	0.00034	9606.ENSP00000264710,9606.ENSP00000265572,9606.ENSP00000300935,9606.ENSP00000314214,9606.ENSP00000344220,9606.ENSP00000354558,9606.ENSP00000451828	RAB10,OPRK1,RAB8A,VAMP2,PDPK1,MTOR,AKT1
GO:0044057	regulation of system process	10	516	0.78	0.00034	9606.ENSP00000262305,9606.ENSP00000265572,9606.ENSP00000276198,9606.ENSP00000303325,9606.ENSP00000332591,9606.ENSP00000340944,9606.ENSP00000354558,9606.ENSP00000386069,9606.ENSP00000386972,9606.ENSP00000451828	RAB11FIP3,OPRK1,HTR2C,TACR3,NPY2R,PTPN11,MTOR,ADRA2C,CALCRL,AKT1
GO:0007267	cell-cell signaling	14	1073	0.61	0.00035	9606.ENSP00000218316,9606.ENSP00000239032,9606.ENSP00000254976,9606.ENSP00000265572,9606.ENSP00000276198,9606.ENSP00000296140,9606.ENSP00000314214,9606.ENSP00000332591,9606.ENSP00000333547,9606.ENSP00000348461,9606.ENSP00000358513,9606.ENSP00000386069,9606.ENSP00000437489,9606.ENSP00000451828	GPR50,PRLHR,SNAP25,OPRK1,HTR2C,CCR1,VAMP2,NPY2R,RAB11B,RAC1,CNR1,ADRA2C,FZD3,AKT1
GO:0019725	cellular homeostasis	12	806	0.67	0.00046	9606.ENSP00000229264,9606.ENSP00000262958,9606.ENSP00000265572,9606.ENSP00000276198,9606.ENSP00000294117,9606.ENSP00000296140,9606.ENSP00000332591,9606.ENSP00000333547,9606.ENSP00000344220,9606.ENSP00000354791,9606.ENSP00000440005,9606.ENSP00000442982	GNB3,GNA15,OPRK1,HTR2C,GNG3,CCR1,NPY2R,RAB11B,PDPK1,DCTN1,ARF1,GPR17
GO:0051930	regulation of sensory perception of pain	4	38	1.51	0.00047	9606.ENSP00000265572,9606.ENSP00000332591,9606.ENSP00000354558,9606.ENSP00000386069	OPRK1,NPY2R,MTOR,ADRA2C
GO:0007189	adenylate cyclase-activating G protein-coupled receptor signaling pathway	5	88	1.25	0.00054	9606.ENSP00000284674,9606.ENSP00000294954,9606.ENSP00000383558,9606.ENSP00000386069,9606.ENSP00000386972	GPR26,LHCGR,GCGR,ADRA2C,CALCRL
GO:0003008	system process	18	1827	0.49	0.00055	9606.ENSP00000226207,9606.ENSP00000229264,9606.ENSP00000254976,9606.ENSP00000265572,9606.ENSP00000283296,9606.ENSP00000294954,9606.ENSP00000303325,9606.ENSP00000304419,9606.ENSP00000313803,9606.ENSP00000332068,9606.ENSP00000354558,9606.ENSP00000354791,9606.ENSP00000358513,9606.ENSP00000371377,9606.ENSP00000383558,9606.ENSP00000386069,9606.ENSP00000386229,9606.ENSP00000451828	MYH1,GNB3,SNAP25,OPRK1,GPR116,LHCGR,TACR3,OR2B2,OR3A1,OR5P3,MTOR,DCTN1,CNR1,OR1A2,GCGR,ADRA2C,RGS14,AKT1
GO:0071310	cellular response to organic substance	20	2219	0.45	0.00057	9606.ENSP00000262958,9606.ENSP00000264710,9606.ENSP00000265572,9606.ENSP00000292174,9606.ENSP00000294954,9606.ENSP00000296140,9606.ENSP00000300935,9606.ENSP00000314214,9606.ENSP00000331600,9606.ENSP00000333547,9606.ENSP00000340944,9606.ENSP00000344220,9606.ENSP00000349967,9606.ENSP00000354558,9606.ENSP00000354791,9606.ENSP00000383558,9606.ENSP00000386972,9606.ENSP00000440005,9606.ENSP00000442982,…	GNA15,RAB10,OPRK1,CXCR5,LHCGR,CCR1,RAB8A,VAMP2,GPR173,RAB11B,PTPN11,PDPK1,CCRL2,MTOR,DCTN1,GCGR,CALCRL,ARF1,GPR17,AKT1
GO:0019882	antigen processing and presentation	6	158	1.07	0.0006	9606.ENSP00000264710,9606.ENSP00000264712,9606.ENSP00000320291,9606.ENSP00000354791,9606.ENSP00000355651,9606.ENSP00000440005	RAB10,KIF3C,OSBPL1A,DCTN1,RAB4A,ARF1
GO:0051051	negative regulation of transport	9	450	0.79	0.0006	9606.ENSP00000262305,9606.ENSP00000265572,9606.ENSP00000332591,9606.ENSP00000340944,9606.ENSP00000348461,9606.ENSP00000354558,9606.ENSP00000358513,9606.ENSP00000386069,9606.ENSP00000451828	RAB11FIP3,OPRK1,NPY2R,PTPN11,RAC1,MTOR,CNR1,ADRA2C,AKT1
GO:0060284	regulation of cell development	12	846	0.64	0.0006	9606.ENSP00000254976,9606.ENSP00000320038,9606.ENSP00000331600,9606.ENSP00000344666,9606.ENSP00000348461,9606.ENSP00000354558,9606.ENSP00000358513,9606.ENSP00000386069,9606.ENSP00000386229,9606.ENSP00000394496,9606.ENSP00000437489,9606.ENSP00000451828	SNAP25,ARHGAP33,GPR173,NF2,RAC1,MTOR,CNR1,ADRA2C,RGS14,CORO1C,FZD3,AKT1
GO:1901698	response to nitrogen compound	13	988	0.61	0.0006	9606.ENSP00000262958,9606.ENSP00000264710,9606.ENSP00000265572,9606.ENSP00000294954,9606.ENSP00000300935,9606.ENSP00000303325,9606.ENSP00000314214,9606.ENSP00000331600,9606.ENSP00000344220,9606.ENSP00000354558,9606.ENSP00000358513,9606.ENSP00000383558,9606.ENSP00000451828	GNA15,RAB10,OPRK1,LHCGR,RAB8A,TACR3,VAMP2,GPR173,PDPK1,MTOR,CNR1,GCGR,AKT1
GO:1901699	cellular response to nitrogen compound	10	568	0.74	0.0006	9606.ENSP00000262958,9606.ENSP00000264710,9606.ENSP00000294954,9606.ENSP00000300935,9606.ENSP00000314214,9606.ENSP00000331600,9606.ENSP00000344220,9606.ENSP00000354558,9606.ENSP00000383558,9606.ENSP00000451828	GNA15,RAB10,LHCGR,RAB8A,VAMP2,GPR173,PDPK1,MTOR,GCGR,AKT1
GO:0007204	positive regulation of cytosolic calcium ion concentration	7	251	0.94	0.0007	9606.ENSP00000262958,9606.ENSP00000276198,9606.ENSP00000294117,9606.ENSP00000296140,9606.ENSP00000332591,9606.ENSP00000344220,9606.ENSP00000442982	GNA15,HTR2C,GNG3,CCR1,NPY2R,PDPK1,GPR17
GO:0032870	cellular response to hormone stimulus	10	585	0.73	0.0007	9606.ENSP00000262958,9606.ENSP00000264710,9606.ENSP00000294954,9606.ENSP00000300935,9606.ENSP00000314214,9606.ENSP00000331600,9606.ENSP00000340944,9606.ENSP00000344220,9606.ENSP00000383558,9606.ENSP00000451828	GNA15,RAB10,LHCGR,RAB8A,VAMP2,GPR173,PTPN11,PDPK1,GCGR,AKT1
GO:0010243	response to organonitrogen compound	12	876	0.63	0.0008	9606.ENSP00000264710,9606.ENSP00000265572,9606.ENSP00000294954,9606.ENSP00000300935,9606.ENSP00000303325,9606.ENSP00000314214,9606.ENSP00000331600,9606.ENSP00000344220,9606.ENSP00000354558,9606.ENSP00000358513,9606.ENSP00000383558,9606.ENSP00000451828	RAB10,OPRK1,LHCGR,RAB8A,TACR3,VAMP2,GPR173,PDPK1,MTOR,CNR1,GCGR,AKT1
GO:0043087	regulation of GTPase activity	9	474	0.77	0.00081	9606.ENSP00000221543,9606.ENSP00000320038,9606.ENSP00000354558,9606.ENSP00000355523,9606.ENSP00000362751,9606.ENSP00000386229,9606.ENSP00000394496,9606.ENSP00000471457,9606.ENSP00000481721	TBC1D17,ARHGAP33,MTOR,RGS7,RABGAP1,RGS14,CORO1C,MYO9B,TBC1D2
GO:0046883	regulation of hormone secretion	7	261	0.92	0.00084	9606.ENSP00000254976,9606.ENSP00000262305,9606.ENSP00000265572,9606.ENSP00000276198,9606.ENSP00000340944,9606.ENSP00000358513,9606.ENSP00000386069	SNAP25,RAB11FIP3,OPRK1,HTR2C,PTPN11,CNR1,ADRA2C
GO:0050433	regulation of catecholamine secretion	4	49	1.4	0.00088	9606.ENSP00000265572,9606.ENSP00000332591,9606.ENSP00000358513,9606.ENSP00000386069	OPRK1,NPY2R,CNR1,ADRA2C
GO:0019932	second-messenger-mediated signaling	7	266	0.91	0.00091	9606.ENSP00000284674,9606.ENSP00000294954,9606.ENSP00000332591,9606.ENSP00000344220,9606.ENSP00000383558,9606.ENSP00000386069,9606.ENSP00000386972	GPR26,LHCGR,NPY2R,PDPK1,GCGR,ADRA2C,CALCRL
GO:0071417	cellular response to organonitrogen compound	9	485	0.76	0.00091	9606.ENSP00000264710,9606.ENSP00000294954,9606.ENSP00000300935,9606.ENSP00000314214,9606.ENSP00000331600,9606.ENSP00000344220,9606.ENSP00000354558,9606.ENSP00000383558,9606.ENSP00000451828	RAB10,LHCGR,RAB8A,VAMP2,GPR173,PDPK1,MTOR,GCGR,AKT1
GO:0006810	transport	28	4130	0.32	0.00095	9606.ENSP00000221543,9606.ENSP00000254976,9606.ENSP00000260746,9606.ENSP00000262305,9606.ENSP00000264710,9606.ENSP00000264712,9606.ENSP00000276198,9606.ENSP00000296140,9606.ENSP00000300935,9606.ENSP00000314214,9606.ENSP00000320038,9606.ENSP00000320291,9606.ENSP00000332591,9606.ENSP00000333547,9606.ENSP00000348461,9606.ENSP00000354791,9606.ENSP00000355651,9606.ENSP00000359305,9606.ENSP00000362751,…	TBC1D17,SNAP25,ARL3,RAB11FIP3,RAB10,KIF3C,HTR2C,CCR1,RAB8A,VAMP2,ARHGAP33,OSBPL1A,NPY2R,RAB11B,RAC1,DCTN1,RAB4A,TMED5,RABGAP1,MYO1B,GCGR,RGS14,CALCRL,CORO1C,MYO10,ARF1,AKT1,TBC1D2
GO:0031998	regulation of fatty acid beta-oxidation	3	16	1.77	0.00095	9606.ENSP00000354558,9606.ENSP00000358513,9606.ENSP00000451828	MTOR,CNR1,AKT1
GO:0042220	response to cocaine	4	51	1.39	0.00095	9606.ENSP00000265572,9606.ENSP00000303325,9606.ENSP00000354558,9606.ENSP00000358513	OPRK1,TACR3,MTOR,CNR1
GO:0046907	intracellular transport	15	1390	0.53	0.00095	9606.ENSP00000221543,9606.ENSP00000254976,9606.ENSP00000260746,9606.ENSP00000262305,9606.ENSP00000264710,9606.ENSP00000264712,9606.ENSP00000300935,9606.ENSP00000314214,9606.ENSP00000333547,9606.ENSP00000354791,9606.ENSP00000362751,9606.ENSP00000386229,9606.ENSP00000421280,9606.ENSP00000451828,9606.ENSP00000481721	TBC1D17,SNAP25,ARL3,RAB11FIP3,RAB10,KIF3C,RAB8A,VAMP2,RAB11B,DCTN1,RABGAP1,RGS14,MYO10,AKT1,TBC1D2
GO:0031295	T cell costimulation	4	52	1.38	0.00097	9606.ENSP00000340944,9606.ENSP00000344220,9606.ENSP00000348461,9606.ENSP00000451828	PTPN11,PDPK1,RAC1,AKT1
GO:0007018	microtubule-based movement	7	276	0.9	0.001	9606.ENSP00000226207,9606.ENSP00000260746,9606.ENSP00000264712,9606.ENSP00000354791,9606.ENSP00000376132,9606.ENSP00000421280,9606.ENSP00000471457	MYH1,ARL3,KIF3C,DCTN1,MYO1B,MYO10,MYO9B
GO:0007200	phospholipase C-activating G protein-coupled receptor signaling pathway	5	109	1.15	0.001	9606.ENSP00000262958,9606.ENSP00000265572,9606.ENSP00000276198,9606.ENSP00000294954,9606.ENSP00000442982	GNA15,OPRK1,HTR2C,LHCGR,GPR17
GO:0051239	regulation of multicellular organismal process	22	2788	0.39	0.001	9606.ENSP00000254976,9606.ENSP00000262305,9606.ENSP00000265572,9606.ENSP00000276198,9606.ENSP00000294954,9606.ENSP00000296140,9606.ENSP00000303325,9606.ENSP00000320038,9606.ENSP00000331600,9606.ENSP00000332591,9606.ENSP00000340944,9606.ENSP00000344220,9606.ENSP00000344666,9606.ENSP00000348461,9606.ENSP00000354558,9606.ENSP00000358513,9606.ENSP00000386069,9606.ENSP00000386229,9606.ENSP00000386972,…	SNAP25,RAB11FIP3,OPRK1,HTR2C,LHCGR,CCR1,TACR3,ARHGAP33,GPR173,NPY2R,PTPN11,PDPK1,NF2,RAC1,MTOR,CNR1,ADRA2C,RGS14,CALCRL,CORO1C,FZD3,AKT1
GO:0010033	response to organic substance	22	2815	0.39	0.0011	9606.ENSP00000262958,9606.ENSP00000264710,9606.ENSP00000265572,9606.ENSP00000292174,9606.ENSP00000294954,9606.ENSP00000296140,9606.ENSP00000300935,9606.ENSP00000303325,9606.ENSP00000314214,9606.ENSP00000331600,9606.ENSP00000333547,9606.ENSP00000340944,9606.ENSP00000344220,9606.ENSP00000349967,9606.ENSP00000354558,9606.ENSP00000354791,9606.ENSP00000358513,9606.ENSP00000383558,9606.ENSP00000386972,…	GNA15,RAB10,OPRK1,CXCR5,LHCGR,CCR1,RAB8A,TACR3,VAMP2,GPR173,RAB11B,PTPN11,PDPK1,CCRL2,MTOR,DCTN1,CNR1,GCGR,CALCRL,ARF1,GPR17,AKT1
GO:0031644	regulation of neurological system process	5	112	1.14	0.0011	9606.ENSP00000265572,9606.ENSP00000276198,9606.ENSP00000332591,9606.ENSP00000354558,9606.ENSP00000386069	OPRK1,HTR2C,NPY2R,MTOR,ADRA2C
GO:0048699	generation of neurons	15	1422	0.52	0.0011	9606.ENSP00000254976,9606.ENSP00000260746,9606.ENSP00000264710,9606.ENSP00000300935,9606.ENSP00000320038,9606.ENSP00000331600,9606.ENSP00000340944,9606.ENSP00000344666,9606.ENSP00000348461,9606.ENSP00000354558,9606.ENSP00000358513,9606.ENSP00000386069,9606.ENSP00000386229,9606.ENSP00000437489,9606.ENSP00000451828	SNAP25,ARL3,RAB10,RAB8A,ARHGAP33,GPR173,PTPN11,NF2,RAC1,MTOR,CNR1,ADRA2C,RGS14,FZD3,AKT1
GO:0051649	establishment of localization in cell	16	1616	0.49	0.0011	9606.ENSP00000221543,9606.ENSP00000254976,9606.ENSP00000260746,9606.ENSP00000262305,9606.ENSP00000264710,9606.ENSP00000264712,9606.ENSP00000276198,9606.ENSP00000300935,9606.ENSP00000314214,9606.ENSP00000333547,9606.ENSP00000354791,9606.ENSP00000362751,9606.ENSP00000386229,9606.ENSP00000421280,9606.ENSP00000451828,9606.ENSP00000481721	TBC1D17,SNAP25,ARL3,RAB11FIP3,RAB10,KIF3C,HTR2C,RAB8A,VAMP2,RAB11B,DCTN1,RABGAP1,RGS14,MYO10,AKT1,TBC1D2
GO:1901700	response to oxygen-containing compound	15	1427	0.51	0.0011	9606.ENSP00000262958,9606.ENSP00000264710,9606.ENSP00000265572,9606.ENSP00000294954,9606.ENSP00000300935,9606.ENSP00000303325,9606.ENSP00000314214,9606.ENSP00000331600,9606.ENSP00000333547,9606.ENSP00000344220,9606.ENSP00000354558,9606.ENSP00000358513,9606.ENSP00000383558,9606.ENSP00000386972,9606.ENSP00000451828	GNA15,RAB10,OPRK1,LHCGR,RAB8A,TACR3,VAMP2,GPR173,RAB11B,PDPK1,MTOR,CNR1,GCGR,CALCRL,AKT1
GO:0051179	localization	32	5233	0.28	0.0012	9606.ENSP00000221543,9606.ENSP00000254976,9606.ENSP00000260746,9606.ENSP00000262305,9606.ENSP00000264710,9606.ENSP00000264712,9606.ENSP00000276198,9606.ENSP00000292174,9606.ENSP00000296140,9606.ENSP00000300935,9606.ENSP00000314214,9606.ENSP00000320038,9606.ENSP00000320291,9606.ENSP00000332591,9606.ENSP00000333547,9606.ENSP00000340944,9606.ENSP00000344220,9606.ENSP00000348461,9606.ENSP00000354791,…	TBC1D17,SNAP25,ARL3,RAB11FIP3,RAB10,KIF3C,HTR2C,CXCR5,CCR1,RAB8A,VAMP2,ARHGAP33,OSBPL1A,NPY2R,RAB11B,PTPN11,PDPK1,RAC1,DCTN1,RAB4A,TMED5,RABGAP1,MYO1B,GCGR,RGS14,CALCRL,CORO1C,MYO10,FZD3,ARF1,AKT1,TBC1D2
GO:0043547	positive regulation of GTPase activity	8	406	0.79	0.0013	9606.ENSP00000221543,9606.ENSP00000320038,9606.ENSP00000355523,9606.ENSP00000362751,9606.ENSP00000386229,9606.ENSP00000394496,9606.ENSP00000471457,9606.ENSP00000481721	TBC1D17,ARHGAP33,RGS7,RABGAP1,RGS14,CORO1C,MYO9B,TBC1D2
GO:0006940	regulation of smooth muscle contraction	4	60	1.32	0.0014	9606.ENSP00000303325,9606.ENSP00000332591,9606.ENSP00000386069,9606.ENSP00000386972	TACR3,NPY2R,ADRA2C,CALCRL
GO:0007610	behavior	9	541	0.71	0.0014	9606.ENSP00000239032,9606.ENSP00000254976,9606.ENSP00000265572,9606.ENSP00000276198,9606.ENSP00000332591,9606.ENSP00000354558,9606.ENSP00000354791,9606.ENSP00000358513,9606.ENSP00000386229	PRLHR,SNAP25,OPRK1,HTR2C,NPY2R,MTOR,DCTN1,CNR1,RGS14
GO:0019220	regulation of phosphate metabolic process	16	1657	0.48	0.0014	9606.ENSP00000229264,9606.ENSP00000265572,9606.ENSP00000276198,9606.ENSP00000283296,9606.ENSP00000294117,9606.ENSP00000294954,9606.ENSP00000296140,9606.ENSP00000340944,9606.ENSP00000344220,9606.ENSP00000344666,9606.ENSP00000348461,9606.ENSP00000354558,9606.ENSP00000386069,9606.ENSP00000386229,9606.ENSP00000394496,9606.ENSP00000451828	GNB3,OPRK1,HTR2C,GPR116,GNG3,LHCGR,CCR1,PTPN11,PDPK1,NF2,RAC1,MTOR,ADRA2C,RGS14,CORO1C,AKT1
GO:0046888	negative regulation of hormone secretion	4	60	1.32	0.0014	9606.ENSP00000262305,9606.ENSP00000265572,9606.ENSP00000340944,9606.ENSP00000386069	RAB11FIP3,OPRK1,PTPN11,ADRA2C
GO:0050790	regulation of catalytic activity	19	2249	0.42	0.0014	9606.ENSP00000221543,9606.ENSP00000262958,9606.ENSP00000294117,9606.ENSP00000294954,9606.ENSP00000320038,9606.ENSP00000340944,9606.ENSP00000344220,9606.ENSP00000344666,9606.ENSP00000354558,9606.ENSP00000355523,9606.ENSP00000355651,9606.ENSP00000358513,9606.ENSP00000362751,9606.ENSP00000386069,9606.ENSP00000386229,9606.ENSP00000394496,9606.ENSP00000451828,9606.ENSP00000471457,9606.ENSP00000481721	TBC1D17,GNA15,GNG3,LHCGR,ARHGAP33,PTPN11,PDPK1,NF2,MTOR,RGS7,RAB4A,CNR1,RABGAP1,ADRA2C,RGS14,CORO1C,AKT1,MYO9B,TBC1D2
GO:0051048	negative regulation of secretion	6	203	0.96	0.0014	9606.ENSP00000262305,9606.ENSP00000265572,9606.ENSP00000332591,9606.ENSP00000340944,9606.ENSP00000358513,9606.ENSP00000386069	RAB11FIP3,OPRK1,NPY2R,PTPN11,CNR1,ADRA2C
GO:0055082	cellular chemical homeostasis	10	665	0.67	0.0014	9606.ENSP00000262958,9606.ENSP00000265572,9606.ENSP00000276198,9606.ENSP00000294117,9606.ENSP00000296140,9606.ENSP00000332591,9606.ENSP00000333547,9606.ENSP00000344220,9606.ENSP00000440005,9606.ENSP00000442982	GNA15,OPRK1,HTR2C,GNG3,CCR1,NPY2R,RAB11B,PDPK1,ARF1,GPR17
GO:0060359	response to ammonium ion	5	122	1.1	0.0014	9606.ENSP00000262958,9606.ENSP00000265572,9606.ENSP00000303325,9606.ENSP00000354558,9606.ENSP00000358513	GNA15,OPRK1,TACR3,MTOR,CNR1
GO:0070887	cellular response to chemical stimulus	21	2672	0.39	0.0014	9606.ENSP00000262958,9606.ENSP00000264710,9606.ENSP00000265572,9606.ENSP00000292174,9606.ENSP00000294954,9606.ENSP00000296140,9606.ENSP00000300935,9606.ENSP00000314214,9606.ENSP00000331600,9606.ENSP00000333547,9606.ENSP00000340944,9606.ENSP00000344220,9606.ENSP00000348461,9606.ENSP00000349967,9606.ENSP00000354558,9606.ENSP00000354791,9606.ENSP00000383558,9606.ENSP00000386972,9606.ENSP00000440005,…	GNA15,RAB10,OPRK1,CXCR5,LHCGR,CCR1,RAB8A,VAMP2,GPR173,RAB11B,PTPN11,PDPK1,RAC1,CCRL2,MTOR,DCTN1,GCGR,CALCRL,ARF1,GPR17,AKT1
GO:0099537	trans-synaptic signaling	8	408	0.78	0.0014	9606.ENSP00000239032,9606.ENSP00000254976,9606.ENSP00000265572,9606.ENSP00000276198,9606.ENSP00000314214,9606.ENSP00000332591,9606.ENSP00000358513,9606.ENSP00000451828	PRLHR,SNAP25,OPRK1,HTR2C,VAMP2,NPY2R,CNR1,AKT1
GO:0023051	regulation of signaling	24	3360	0.35	0.0015	9606.ENSP00000254976,9606.ENSP00000262305,9606.ENSP00000265572,9606.ENSP00000276198,9606.ENSP00000294117,9606.ENSP00000296140,9606.ENSP00000300935,9606.ENSP00000314214,9606.ENSP00000320038,9606.ENSP00000332591,9606.ENSP00000333547,9606.ENSP00000340944,9606.ENSP00000344220,9606.ENSP00000344666,9606.ENSP00000348461,9606.ENSP00000354558,9606.ENSP00000355523,9606.ENSP00000358513,9606.ENSP00000386069,…	SNAP25,RAB11FIP3,OPRK1,HTR2C,GNG3,CCR1,RAB8A,VAMP2,ARHGAP33,NPY2R,RAB11B,PTPN11,PDPK1,NF2,RAC1,MTOR,RGS7,CNR1,ADRA2C,RGS14,ARF1,GPR17,AKT1,MYO9B
GO:0045595	regulation of cell differentiation	16	1695	0.47	0.0016	9606.ENSP00000229264,9606.ENSP00000254976,9606.ENSP00000276198,9606.ENSP00000294954,9606.ENSP00000296140,9606.ENSP00000320038,9606.ENSP00000331600,9606.ENSP00000344666,9606.ENSP00000348461,9606.ENSP00000354558,9606.ENSP00000358513,9606.ENSP00000386069,9606.ENSP00000386229,9606.ENSP00000394496,9606.ENSP00000437489,9606.ENSP00000451828	GNB3,SNAP25,HTR2C,LHCGR,CCR1,ARHGAP33,GPR173,NF2,RAC1,MTOR,CNR1,ADRA2C,RGS14,CORO1C,FZD3,AKT1
GO:0010675	regulation of cellular carbohydrate metabolic process	5	133	1.07	0.0017	9606.ENSP00000229264,9606.ENSP00000294954,9606.ENSP00000354558,9606.ENSP00000383558,9606.ENSP00000451828	GNB3,LHCGR,MTOR,GCGR,AKT1
GO:0050804	modulation of chemical synaptic transmission	7	316	0.84	0.0017	9606.ENSP00000254976,9606.ENSP00000300935,9606.ENSP00000314214,9606.ENSP00000332591,9606.ENSP00000358513,9606.ENSP00000386229,9606.ENSP00000440005	SNAP25,RAB8A,VAMP2,NPY2R,CNR1,RGS14,ARF1
GO:0006928	movement of cell or subcellular component	14	1355	0.51	0.0019	9606.ENSP00000226207,9606.ENSP00000260746,9606.ENSP00000264712,9606.ENSP00000292174,9606.ENSP00000296140,9606.ENSP00000340944,9606.ENSP00000344220,9606.ENSP00000348461,9606.ENSP00000354791,9606.ENSP00000376132,9606.ENSP00000394496,9606.ENSP00000421280,9606.ENSP00000437489,9606.ENSP00000471457	MYH1,ARL3,KIF3C,CXCR5,CCR1,PTPN11,PDPK1,RAC1,DCTN1,MYO1B,CORO1C,MYO10,FZD3,MYO9B
GO:0048193	Golgi vesicle transport	7	325	0.83	0.0019	9606.ENSP00000260746,9606.ENSP00000264710,9606.ENSP00000264712,9606.ENSP00000300935,9606.ENSP00000314214,9606.ENSP00000354791,9606.ENSP00000376132	ARL3,RAB10,KIF3C,RAB8A,VAMP2,DCTN1,MYO1B
GO:1902745	positive regulation of lamellipodium organization	3	25	1.57	0.002	9606.ENSP00000348461,9606.ENSP00000354558,9606.ENSP00000394496	RAC1,MTOR,CORO1C
GO:0046889	positive regulation of lipid biosynthetic process	4	73	1.23	0.0022	9606.ENSP00000276198,9606.ENSP00000283296,9606.ENSP00000354558,9606.ENSP00000451828	HTR2C,GPR116,MTOR,AKT1
GO:0048520	positive regulation of behavior	3	26	1.55	0.0022	9606.ENSP00000265572,9606.ENSP00000332591,9606.ENSP00000354558	OPRK1,NPY2R,MTOR
GO:0072347	response to anesthetic	4	73	1.23	0.0022	9606.ENSP00000265572,9606.ENSP00000303325,9606.ENSP00000354558,9606.ENSP00000358513	OPRK1,TACR3,MTOR,CNR1
GO:0002376	immune system process	19	2370	0.4	0.0023	9606.ENSP00000254976,9606.ENSP00000264710,9606.ENSP00000264712,9606.ENSP00000265572,9606.ENSP00000283296,9606.ENSP00000292174,9606.ENSP00000296140,9606.ENSP00000314214,9606.ENSP00000320291,9606.ENSP00000340944,9606.ENSP00000344220,9606.ENSP00000348461,9606.ENSP00000354558,9606.ENSP00000354791,9606.ENSP00000355651,9606.ENSP00000421280,9606.ENSP00000440005,9606.ENSP00000442982,9606.ENSP00000451828	SNAP25,RAB10,KIF3C,OPRK1,GPR116,CXCR5,CCR1,VAMP2,OSBPL1A,PTPN11,PDPK1,RAC1,MTOR,DCTN1,RAB4A,MYO10,ARF1,GPR17,AKT1
GO:0050767	regulation of neurogenesis	10	730	0.63	0.0023	9606.ENSP00000254976,9606.ENSP00000320038,9606.ENSP00000331600,9606.ENSP00000344666,9606.ENSP00000354558,9606.ENSP00000358513,9606.ENSP00000386069,9606.ENSP00000386229,9606.ENSP00000437489,9606.ENSP00000451828	SNAP25,ARHGAP33,GPR173,NF2,MTOR,CNR1,ADRA2C,RGS14,FZD3,AKT1
GO:1902531	regulation of intracellular signal transduction	16	1764	0.45	0.0023	9606.ENSP00000265572,9606.ENSP00000276198,9606.ENSP00000294117,9606.ENSP00000296140,9606.ENSP00000320038,9606.ENSP00000332591,9606.ENSP00000340944,9606.ENSP00000344220,9606.ENSP00000344666,9606.ENSP00000348461,9606.ENSP00000354558,9606.ENSP00000386069,9606.ENSP00000386229,9606.ENSP00000442982,9606.ENSP00000451828,9606.ENSP00000471457	OPRK1,HTR2C,GNG3,CCR1,ARHGAP33,NPY2R,PTPN11,PDPK1,NF2,RAC1,MTOR,ADRA2C,RGS14,GPR17,AKT1,MYO9B
GO:0008306	associative learning	4	75	1.22	0.0024	9606.ENSP00000254976,9606.ENSP00000265572,9606.ENSP00000354558,9606.ENSP00000386229	SNAP25,OPRK1,MTOR,RGS14
GO:0045937	positive regulation of phosphate metabolic process	12	1052	0.55	0.0024	9606.ENSP00000265572,9606.ENSP00000276198,9606.ENSP00000283296,9606.ENSP00000294117,9606.ENSP00000294954,9606.ENSP00000296140,9606.ENSP00000340944,9606.ENSP00000344220,9606.ENSP00000348461,9606.ENSP00000354558,9606.ENSP00000386069,9606.ENSP00000451828	OPRK1,HTR2C,GPR116,GNG3,LHCGR,CCR1,PTPN11,PDPK1,RAC1,MTOR,ADRA2C,AKT1
GO:0070098	chemokine-mediated signaling pathway	4	75	1.22	0.0024	9606.ENSP00000292174,9606.ENSP00000296140,9606.ENSP00000349967,9606.ENSP00000442982	CXCR5,CCR1,CCRL2,GPR17
GO:0014059	regulation of dopamine secretion	3	28	1.52	0.0025	9606.ENSP00000265572,9606.ENSP00000332591,9606.ENSP00000358513	OPRK1,NPY2R,CNR1
GO:0032880	regulation of protein localization	11	901	0.58	0.0025	9606.ENSP00000254976,9606.ENSP00000262305,9606.ENSP00000300935,9606.ENSP00000314214,9606.ENSP00000333547,9606.ENSP00000340944,9606.ENSP00000344220,9606.ENSP00000344666,9606.ENSP00000358513,9606.ENSP00000386069,9606.ENSP00000451828	SNAP25,RAB11FIP3,RAB8A,VAMP2,RAB11B,PTPN11,PDPK1,NF2,CNR1,ADRA2C,AKT1
GO:0007166	cell surface receptor signaling pathway	18	2198	0.41	0.0026	9606.ENSP00000260746,9606.ENSP00000283296,9606.ENSP00000292174,9606.ENSP00000296140,9606.ENSP00000300098,9606.ENSP00000340944,9606.ENSP00000344220,9606.ENSP00000348461,9606.ENSP00000349967,9606.ENSP00000383558,9606.ENSP00000386229,9606.ENSP00000386972,9606.ENSP00000421280,9606.ENSP00000437489,9606.ENSP00000440005,9606.ENSP00000442982,9606.ENSP00000451828,9606.ENSP00000471457	ARL3,GPR116,CXCR5,CCR1,GPR182,PTPN11,PDPK1,RAC1,CCRL2,GCGR,RGS14,CALCRL,MYO10,FZD3,ARF1,GPR17,AKT1,MYO9B
GO:0030030	cell projection organization	12	1067	0.54	0.0026	9606.ENSP00000260746,9606.ENSP00000264710,9606.ENSP00000264712,9606.ENSP00000300935,9606.ENSP00000340944,9606.ENSP00000348461,9606.ENSP00000354558,9606.ENSP00000354791,9606.ENSP00000358513,9606.ENSP00000437489,9606.ENSP00000440005,9606.ENSP00000451828	ARL3,RAB10,KIF3C,RAB8A,PTPN11,RAC1,MTOR,DCTN1,CNR1,FZD3,ARF1,AKT1
GO:0032869	cellular response to insulin stimulus	5	153	1.01	0.0027	9606.ENSP00000264710,9606.ENSP00000300935,9606.ENSP00000314214,9606.ENSP00000344220,9606.ENSP00000451828	RAB10,RAB8A,VAMP2,PDPK1,AKT1
GO:0050793	regulation of developmental process	19	2416	0.39	0.0027	9606.ENSP00000229264,9606.ENSP00000254976,9606.ENSP00000276198,9606.ENSP00000294954,9606.ENSP00000296140,9606.ENSP00000320038,9606.ENSP00000331600,9606.ENSP00000340944,9606.ENSP00000344220,9606.ENSP00000344666,9606.ENSP00000348461,9606.ENSP00000354558,9606.ENSP00000358513,9606.ENSP00000386069,9606.ENSP00000386229,9606.ENSP00000394496,9606.ENSP00000421280,9606.ENSP00000437489,9606.ENSP00000451828	GNB3,SNAP25,HTR2C,LHCGR,CCR1,ARHGAP33,GPR173,PTPN11,PDPK1,NF2,RAC1,MTOR,CNR1,ADRA2C,RGS14,CORO1C,MYO10,FZD3,AKT1
GO:1904000	positive regulation of eating behavior	2	4	2.19	0.0027	9606.ENSP00000265572,9606.ENSP00000354558	OPRK1,MTOR
GO:0010646	regulation of cell communication	23	3327	0.33	0.0029	9606.ENSP00000254976,9606.ENSP00000262305,9606.ENSP00000265572,9606.ENSP00000276198,9606.ENSP00000294117,9606.ENSP00000296140,9606.ENSP00000300935,9606.ENSP00000314214,9606.ENSP00000320038,9606.ENSP00000332591,9606.ENSP00000340944,9606.ENSP00000344220,9606.ENSP00000344666,9606.ENSP00000348461,9606.ENSP00000354558,9606.ENSP00000355523,9606.ENSP00000358513,9606.ENSP00000386069,9606.ENSP00000386229,…	SNAP25,RAB11FIP3,OPRK1,HTR2C,GNG3,CCR1,RAB8A,VAMP2,ARHGAP33,NPY2R,PTPN11,PDPK1,NF2,RAC1,MTOR,RGS7,CNR1,ADRA2C,RGS14,ARF1,GPR17,AKT1,MYO9B
GO:0043269	regulation of ion transport	9	618	0.66	0.0029	9606.ENSP00000265572,9606.ENSP00000296140,9606.ENSP00000314214,9606.ENSP00000332591,9606.ENSP00000333547,9606.ENSP00000344220,9606.ENSP00000354558,9606.ENSP00000358513,9606.ENSP00000451828	OPRK1,CCR1,VAMP2,NPY2R,RAB11B,PDPK1,MTOR,CNR1,AKT1
GO:0006892	post-Golgi vesicle-mediated transport	4	83	1.18	0.003	9606.ENSP00000260746,9606.ENSP00000264710,9606.ENSP00000314214,9606.ENSP00000376132	ARL3,RAB10,VAMP2,MYO1B
GO:0051241	negative regulation of multicellular organismal process	12	1098	0.53	0.003	9606.ENSP00000262305,9606.ENSP00000265572,9606.ENSP00000296140,9606.ENSP00000331600,9606.ENSP00000332591,9606.ENSP00000340944,9606.ENSP00000348461,9606.ENSP00000354558,9606.ENSP00000386069,9606.ENSP00000386972,9606.ENSP00000394496,9606.ENSP00000437489	RAB11FIP3,OPRK1,CCR1,GPR173,NPY2R,PTPN11,RAC1,MTOR,ADRA2C,CALCRL,CORO1C,FZD3
GO:2001023	regulation of response to drug	4	83	1.18	0.003	9606.ENSP00000265572,9606.ENSP00000332591,9606.ENSP00000340944,9606.ENSP00000358513	OPRK1,NPY2R,PTPN11,CNR1
GO:0051482	positive regulation of cytosolic calcium ion concentration involved in phospholipase C-activating G protein-coupled signaling pathway	3	32	1.46	0.0031	9606.ENSP00000262958,9606.ENSP00000276198,9606.ENSP00000442982	GNA15,HTR2C,GPR17
GO:0071702	organic substance transport	17	2040	0.41	0.0031	9606.ENSP00000221543,9606.ENSP00000254976,9606.ENSP00000260746,9606.ENSP00000264710,9606.ENSP00000264712,9606.ENSP00000300935,9606.ENSP00000314214,9606.ENSP00000320038,9606.ENSP00000320291,9606.ENSP00000333547,9606.ENSP00000355651,9606.ENSP00000359305,9606.ENSP00000362751,9606.ENSP00000386972,9606.ENSP00000440005,9606.ENSP00000451828,9606.ENSP00000481721	TBC1D17,SNAP25,ARL3,RAB10,KIF3C,RAB8A,VAMP2,ARHGAP33,OSBPL1A,RAB11B,RAB4A,TMED5,RABGAP1,CALCRL,ARF1,AKT1,TBC1D2
GO:0006875	cellular metal ion homeostasis	8	499	0.7	0.0034	9606.ENSP00000262958,9606.ENSP00000276198,9606.ENSP00000294117,9606.ENSP00000296140,9606.ENSP00000332591,9606.ENSP00000344220,9606.ENSP00000440005,9606.ENSP00000442982	GNA15,HTR2C,GNG3,CCR1,NPY2R,PDPK1,ARF1,GPR17
GO:0008015	blood circulation	7	373	0.77	0.0034	9606.ENSP00000229264,9606.ENSP00000303325,9606.ENSP00000354558,9606.ENSP00000358513,9606.ENSP00000383558,9606.ENSP00000386069,9606.ENSP00000451828	GNB3,TACR3,MTOR,CNR1,GCGR,ADRA2C,AKT1
GO:0031999	negative regulation of fatty acid beta-oxidation	2	5	2.09	0.0034	9606.ENSP00000358513,9606.ENSP00000451828	CNR1,AKT1
GO:0033036	macromolecule localization	18	2268	0.39	0.0034	9606.ENSP00000221543,9606.ENSP00000254976,9606.ENSP00000260746,9606.ENSP00000264710,9606.ENSP00000264712,9606.ENSP00000300935,9606.ENSP00000314214,9606.ENSP00000320038,9606.ENSP00000320291,9606.ENSP00000333547,9606.ENSP00000355651,9606.ENSP00000359305,9606.ENSP00000362751,9606.ENSP00000386972,9606.ENSP00000394496,9606.ENSP00000440005,9606.ENSP00000451828,9606.ENSP00000481721	TBC1D17,SNAP25,ARL3,RAB10,KIF3C,RAB8A,VAMP2,ARHGAP33,OSBPL1A,RAB11B,RAB4A,TMED5,RABGAP1,CALCRL,CORO1C,ARF1,AKT1,TBC1D2
GO:0048167	regulation of synaptic plasticity	5	164	0.98	0.0034	9606.ENSP00000254976,9606.ENSP00000300935,9606.ENSP00000314214,9606.ENSP00000386229,9606.ENSP00000440005	SNAP25,RAB8A,VAMP2,RGS14,ARF1
GO:0070873	regulation of glycogen metabolic process	3	34	1.44	0.0035	9606.ENSP00000354558,9606.ENSP00000383558,9606.ENSP00000451828	MTOR,GCGR,AKT1
GO:0032501	multicellular organismal process	35	6507	0.22	0.0036	9606.ENSP00000226207,9606.ENSP00000229264,9606.ENSP00000239032,9606.ENSP00000254976,9606.ENSP00000260746,9606.ENSP00000262958,9606.ENSP00000264710,9606.ENSP00000265572,9606.ENSP00000276198,9606.ENSP00000283296,9606.ENSP00000292174,9606.ENSP00000294954,9606.ENSP00000300935,9606.ENSP00000303325,9606.ENSP00000304419,9606.ENSP00000313803,9606.ENSP00000320038,9606.ENSP00000331600,9606.ENSP00000332068,…	MYH1,GNB3,PRLHR,SNAP25,ARL3,GNA15,RAB10,OPRK1,HTR2C,GPR116,CXCR5,LHCGR,RAB8A,TACR3,OR2B2,OR3A1,ARHGAP33,GPR173,OR5P3,NPY2R,PTPN11,PDPK1,NF2,RAC1,MTOR,DCTN1,CNR1,OR1A2,GCGR,ADRA2C,RGS14,CALCRL,CORO1C,FZD3,AKT1
GO:0090087	regulation of peptide transport	9	654	0.63	0.0038	9606.ENSP00000254976,9606.ENSP00000262305,9606.ENSP00000276198,9606.ENSP00000300935,9606.ENSP00000314214,9606.ENSP00000332591,9606.ENSP00000340944,9606.ENSP00000358513,9606.ENSP00000386069	SNAP25,RAB11FIP3,HTR2C,RAB8A,VAMP2,NPY2R,PTPN11,CNR1,ADRA2C
GO:0090630	activation of GTPase activity	4	91	1.14	0.0038	9606.ENSP00000221543,9606.ENSP00000362751,9606.ENSP00000394496,9606.ENSP00000481721	TBC1D17,RABGAP1,CORO1C,TBC1D2
GO:0007631	feeding behavior	4	94	1.12	0.0041	9606.ENSP00000239032,9606.ENSP00000265572,9606.ENSP00000276198,9606.ENSP00000332591	PRLHR,OPRK1,HTR2C,NPY2R
GO:0033603	positive regulation of dopamine secretion	2	6	2.02	0.0041	9606.ENSP00000265572,9606.ENSP00000332591	OPRK1,NPY2R
GO:0050890	cognition	6	274	0.83	0.0041	9606.ENSP00000254976,9606.ENSP00000265572,9606.ENSP00000294954,9606.ENSP00000354558,9606.ENSP00000358513,9606.ENSP00000386229	SNAP25,OPRK1,LHCGR,MTOR,CNR1,RGS14
GO:0019886	antigen processing and presentation of exogenous peptide antigen via MHC class II	4	96	1.11	0.0043	9606.ENSP00000264712,9606.ENSP00000320291,9606.ENSP00000354791,9606.ENSP00000440005	KIF3C,OSBPL1A,DCTN1,ARF1
GO:0006904	vesicle docking involved in exocytosis	3	38	1.39	0.0044	9606.ENSP00000254976,9606.ENSP00000264710,9606.ENSP00000300935	SNAP25,RAB10,RAB8A
GO:1903531	negative regulation of secretion by cell	5	178	0.94	0.0044	9606.ENSP00000262305,9606.ENSP00000265572,9606.ENSP00000340944,9606.ENSP00000358513,9606.ENSP00000386069	RAB11FIP3,OPRK1,PTPN11,CNR1,ADRA2C
GO:0007565	female pregnancy	5	180	0.94	0.0045	9606.ENSP00000239032,9606.ENSP00000354558,9606.ENSP00000358513,9606.ENSP00000386069,9606.ENSP00000451828	PRLHR,MTOR,CNR1,ADRA2C,AKT1
GO:0007268	chemical synaptic transmission	7	402	0.73	0.0046	9606.ENSP00000239032,9606.ENSP00000254976,9606.ENSP00000265572,9606.ENSP00000276198,9606.ENSP00000314214,9606.ENSP00000332591,9606.ENSP00000451828	PRLHR,SNAP25,OPRK1,HTR2C,VAMP2,NPY2R,AKT1
GO:0010906	regulation of glucose metabolic process	4	100	1.09	0.0047	9606.ENSP00000229264,9606.ENSP00000354558,9606.ENSP00000383558,9606.ENSP00000451828	GNB3,MTOR,GCGR,AKT1
GO:0016197	endosomal transport	5	185	0.92	0.0048	9606.ENSP00000221543,9606.ENSP00000262305,9606.ENSP00000264710,9606.ENSP00000333547,9606.ENSP00000354791	TBC1D17,RAB11FIP3,RAB10,RAB11B,DCTN1
GO:0060291	long-term synaptic potentiation	3	40	1.37	0.0048	9606.ENSP00000254976,9606.ENSP00000314214,9606.ENSP00000386229	SNAP25,VAMP2,RGS14
GO:0071364	cellular response to epidermal growth factor stimulus	3	40	1.37	0.0048	9606.ENSP00000340944,9606.ENSP00000344220,9606.ENSP00000451828	PTPN11,PDPK1,AKT1
GO:0001932	regulation of protein phosphorylation	13	1370	0.47	0.005	9606.ENSP00000265572,9606.ENSP00000276198,9606.ENSP00000294117,9606.ENSP00000296140,9606.ENSP00000340944,9606.ENSP00000344220,9606.ENSP00000344666,9606.ENSP00000348461,9606.ENSP00000354558,9606.ENSP00000386069,9606.ENSP00000386229,9606.ENSP00000394496,9606.ENSP00000451828	OPRK1,HTR2C,GNG3,CCR1,PTPN11,PDPK1,NF2,RAC1,MTOR,ADRA2C,RGS14,CORO1C,AKT1
GO:0051641	cellular localization	17	2180	0.38	0.0054	9606.ENSP00000221543,9606.ENSP00000254976,9606.ENSP00000260746,9606.ENSP00000262305,9606.ENSP00000264710,9606.ENSP00000264712,9606.ENSP00000276198,9606.ENSP00000300935,9606.ENSP00000314214,9606.ENSP00000333547,9606.ENSP00000348461,9606.ENSP00000354791,9606.ENSP00000362751,9606.ENSP00000386229,9606.ENSP00000421280,9606.ENSP00000451828,9606.ENSP00000481721	TBC1D17,SNAP25,ARL3,RAB11FIP3,RAB10,KIF3C,HTR2C,RAB8A,VAMP2,RAB11B,RAC1,DCTN1,RABGAP1,RGS14,MYO10,AKT1,TBC1D2
GO:0120036	plasma membrane bounded cell projection organization	11	1034	0.52	0.0057	9606.ENSP00000260746,9606.ENSP00000264710,9606.ENSP00000264712,9606.ENSP00000300935,9606.ENSP00000340944,9606.ENSP00000348461,9606.ENSP00000354558,9606.ENSP00000354791,9606.ENSP00000358513,9606.ENSP00000437489,9606.ENSP00000440005	ARL3,RAB10,KIF3C,RAB8A,PTPN11,RAC1,MTOR,DCTN1,CNR1,FZD3,ARF1
GO:0043408	regulation of MAPK cascade	9	712	0.59	0.0059	9606.ENSP00000265572,9606.ENSP00000276198,9606.ENSP00000294117,9606.ENSP00000296140,9606.ENSP00000340944,9606.ENSP00000344666,9606.ENSP00000386069,9606.ENSP00000386229,9606.ENSP00000451828	OPRK1,HTR2C,GNG3,CCR1,PTPN11,NF2,ADRA2C,RGS14,AKT1
GO:0065009	regulation of molecular function	22	3322	0.31	0.0059	9606.ENSP00000221543,9606.ENSP00000262958,9606.ENSP00000294117,9606.ENSP00000294954,9606.ENSP00000314214,9606.ENSP00000320038,9606.ENSP00000332591,9606.ENSP00000340944,9606.ENSP00000344220,9606.ENSP00000344666,9606.ENSP00000354558,9606.ENSP00000355523,9606.ENSP00000355651,9606.ENSP00000358513,9606.ENSP00000362751,9606.ENSP00000383558,9606.ENSP00000386069,9606.ENSP00000386229,9606.ENSP00000394496,…	TBC1D17,GNA15,GNG3,LHCGR,VAMP2,ARHGAP33,NPY2R,PTPN11,PDPK1,NF2,MTOR,RGS7,RAB4A,CNR1,RABGAP1,GCGR,ADRA2C,RGS14,CORO1C,AKT1,MYO9B,TBC1D2
GO:0007218	neuropeptide signaling pathway	4	110	1.05	0.0061	9606.ENSP00000239032,9606.ENSP00000265572,9606.ENSP00000303325,9606.ENSP00000332591	PRLHR,OPRK1,TACR3,NPY2R
GO:0044060	regulation of endocrine process	3	45	1.32	0.0061	9606.ENSP00000262305,9606.ENSP00000265572,9606.ENSP00000340944	RAB11FIP3,OPRK1,PTPN11
GO:0040012	regulation of locomotion	10	881	0.55	0.0062	9606.ENSP00000265572,9606.ENSP00000296140,9606.ENSP00000303325,9606.ENSP00000331600,9606.ENSP00000344220,9606.ENSP00000344666,9606.ENSP00000348461,9606.ENSP00000354558,9606.ENSP00000394496,9606.ENSP00000451828	OPRK1,CCR1,TACR3,GPR173,PDPK1,NF2,RAC1,MTOR,CORO1C,AKT1
GO:0034656	nucleobase-containing small molecule catabolic process	3	46	1.31	0.0064	9606.ENSP00000258662,9606.ENSP00000359520,9606.ENSP00000360561	NUDT15,ENTPD7,ENTPD8
GO:0070472	regulation of uterine smooth muscle contraction	2	9	1.84	0.0066	9606.ENSP00000303325,9606.ENSP00000386069	TACR3,ADRA2C
GO:0090276	regulation of peptide hormone secretion	5	204	0.88	0.0066	9606.ENSP00000254976,9606.ENSP00000276198,9606.ENSP00000340944,9606.ENSP00000358513,9606.ENSP00000386069	SNAP25,HTR2C,PTPN11,CNR1,ADRA2C
GO:0010648	negative regulation of cell communication	12	1255	0.47	0.0073	9606.ENSP00000262305,9606.ENSP00000265572,9606.ENSP00000332591,9606.ENSP00000340944,9606.ENSP00000344220,9606.ENSP00000344666,9606.ENSP00000354558,9606.ENSP00000355523,9606.ENSP00000386069,9606.ENSP00000386229,9606.ENSP00000440005,9606.ENSP00000451828	RAB11FIP3,OPRK1,NPY2R,PTPN11,PDPK1,NF2,MTOR,RGS7,ADRA2C,RGS14,ARF1,AKT1
GO:0023057	negative regulation of signaling	12	1258	0.47	0.0074	9606.ENSP00000262305,9606.ENSP00000265572,9606.ENSP00000332591,9606.ENSP00000340944,9606.ENSP00000344220,9606.ENSP00000344666,9606.ENSP00000354558,9606.ENSP00000355523,9606.ENSP00000386069,9606.ENSP00000386229,9606.ENSP00000440005,9606.ENSP00000451828	RAB11FIP3,OPRK1,NPY2R,PTPN11,PDPK1,NF2,MTOR,RGS7,ADRA2C,RGS14,ARF1,AKT1
GO:0045597	positive regulation of cell differentiation	10	908	0.53	0.0075	9606.ENSP00000276198,9606.ENSP00000296140,9606.ENSP00000344666,9606.ENSP00000348461,9606.ENSP00000354558,9606.ENSP00000358513,9606.ENSP00000386069,9606.ENSP00000386229,9606.ENSP00000437489,9606.ENSP00000451828	HTR2C,CCR1,NF2,RAC1,MTOR,CNR1,ADRA2C,RGS14,FZD3,AKT1
GO:0002791	regulation of peptide secretion	7	452	0.68	0.0076	9606.ENSP00000254976,9606.ENSP00000262305,9606.ENSP00000276198,9606.ENSP00000332591,9606.ENSP00000340944,9606.ENSP00000358513,9606.ENSP00000386069	SNAP25,RAB11FIP3,HTR2C,NPY2R,PTPN11,CNR1,ADRA2C
GO:0030168	platelet activation	4	120	1.02	0.0076	9606.ENSP00000262958,9606.ENSP00000340944,9606.ENSP00000344220,9606.ENSP00000386069	GNA15,PTPN11,PDPK1,ADRA2C
GO:0043276	anoikis	2	10	1.79	0.0076	9606.ENSP00000354558,9606.ENSP00000451828	MTOR,AKT1
GO:0045598	regulation of fat cell differentiation	4	120	1.02	0.0076	9606.ENSP00000229264,9606.ENSP00000276198,9606.ENSP00000354558,9606.ENSP00000451828	GNB3,HTR2C,MTOR,AKT1
GO:0045792	negative regulation of cell size	2	10	1.79	0.0076	9606.ENSP00000354558,9606.ENSP00000451828	MTOR,AKT1
GO:0051496	positive regulation of stress fiber assembly	3	50	1.27	0.0076	9606.ENSP00000344666,9606.ENSP00000348461,9606.ENSP00000354558	NF2,RAC1,MTOR
GO:0098969	neurotransmitter receptor transport to postsynaptic membrane	2	10	1.79	0.0076	9606.ENSP00000254976,9606.ENSP00000300935	SNAP25,RAB8A
GO:0050877	nervous system process	12	1271	0.47	0.0077	9606.ENSP00000254976,9606.ENSP00000265572,9606.ENSP00000294954,9606.ENSP00000304419,9606.ENSP00000313803,9606.ENSP00000332068,9606.ENSP00000354558,9606.ENSP00000354791,9606.ENSP00000358513,9606.ENSP00000371377,9606.ENSP00000386229,9606.ENSP00000451828	SNAP25,OPRK1,LHCGR,OR2B2,OR3A1,OR5P3,MTOR,DCTN1,CNR1,OR1A2,RGS14,AKT1
GO:0120035	regulation of plasma membrane bounded cell projection organization	8	600	0.62	0.0077	9606.ENSP00000254976,9606.ENSP00000320038,9606.ENSP00000348461,9606.ENSP00000354558,9606.ENSP00000358513,9606.ENSP00000394496,9606.ENSP00000421280,9606.ENSP00000451828	SNAP25,ARHGAP33,RAC1,MTOR,CNR1,CORO1C,MYO10,AKT1
GO:0007017	microtubule-based process	8	605	0.61	0.008	9606.ENSP00000226207,9606.ENSP00000260746,9606.ENSP00000264712,9606.ENSP00000354791,9606.ENSP00000376132,9606.ENSP00000386229,9606.ENSP00000421280,9606.ENSP00000471457	MYH1,ARL3,KIF3C,DCTN1,MYO1B,RGS14,MYO10,MYO9B
GO:0007173	epidermal growth factor receptor signaling pathway	3	52	1.25	0.008	9606.ENSP00000340944,9606.ENSP00000344220,9606.ENSP00000451828	PTPN11,PDPK1,AKT1
GO:0062012	regulation of small molecule metabolic process	6	332	0.75	0.008	9606.ENSP00000229264,9606.ENSP00000294954,9606.ENSP00000354558,9606.ENSP00000358513,9606.ENSP00000383558,9606.ENSP00000451828	GNB3,LHCGR,MTOR,CNR1,GCGR,AKT1
GO:0090150	establishment of protein localization to membrane	5	217	0.85	0.008	9606.ENSP00000254976,9606.ENSP00000264710,9606.ENSP00000300935,9606.ENSP00000314214,9606.ENSP00000333547	SNAP25,RAB10,RAB8A,VAMP2,RAB11B
GO:0051094	positive regulation of developmental process	12	1286	0.46	0.0081	9606.ENSP00000276198,9606.ENSP00000296140,9606.ENSP00000344220,9606.ENSP00000344666,9606.ENSP00000348461,9606.ENSP00000354558,9606.ENSP00000358513,9606.ENSP00000386069,9606.ENSP00000386229,9606.ENSP00000394496,9606.ENSP00000437489,9606.ENSP00000451828	HTR2C,CCR1,PDPK1,NF2,RAC1,MTOR,CNR1,ADRA2C,RGS14,CORO1C,FZD3,AKT1
GO:0071495	cellular response to endogenous stimulus	11	1106	0.49	0.0082	9606.ENSP00000262958,9606.ENSP00000264710,9606.ENSP00000294954,9606.ENSP00000300935,9606.ENSP00000314214,9606.ENSP00000331600,9606.ENSP00000340944,9606.ENSP00000344220,9606.ENSP00000354558,9606.ENSP00000383558,9606.ENSP00000451828	GNA15,RAB10,LHCGR,RAB8A,VAMP2,GPR173,PTPN11,PDPK1,MTOR,GCGR,AKT1
GO:0001934	positive regulation of protein phosphorylation	10	941	0.52	0.0087	9606.ENSP00000265572,9606.ENSP00000276198,9606.ENSP00000294117,9606.ENSP00000296140,9606.ENSP00000340944,9606.ENSP00000344220,9606.ENSP00000348461,9606.ENSP00000354558,9606.ENSP00000386069,9606.ENSP00000451828	OPRK1,HTR2C,GNG3,CCR1,PTPN11,PDPK1,RAC1,MTOR,ADRA2C,AKT1
GO:0090257	regulation of muscle system process	5	224	0.84	0.0087	9606.ENSP00000303325,9606.ENSP00000332591,9606.ENSP00000354558,9606.ENSP00000386069,9606.ENSP00000386972	TACR3,NPY2R,MTOR,ADRA2C,CALCRL
GO:0030155	regulation of cell adhesion	8	623	0.6	0.0092	9606.ENSP00000332591,9606.ENSP00000340944,9606.ENSP00000344220,9606.ENSP00000344666,9606.ENSP00000348461,9606.ENSP00000394496,9606.ENSP00000421280,9606.ENSP00000451828	NPY2R,PTPN11,PDPK1,NF2,RAC1,CORO1C,MYO10,AKT1
GO:0032147	activation of protein kinase activity	6	347	0.73	0.0094	9606.ENSP00000294117,9606.ENSP00000340944,9606.ENSP00000344220,9606.ENSP00000354558,9606.ENSP00000386069,9606.ENSP00000451828	GNG3,PTPN11,PDPK1,MTOR,ADRA2C,AKT1
GO:0045859	regulation of protein kinase activity	9	788	0.55	0.0096	9606.ENSP00000294117,9606.ENSP00000340944,9606.ENSP00000344220,9606.ENSP00000344666,9606.ENSP00000354558,9606.ENSP00000386069,9606.ENSP00000386229,9606.ENSP00000394496,9606.ENSP00000451828	GNG3,PTPN11,PDPK1,NF2,MTOR,ADRA2C,RGS14,CORO1C,AKT1
GO:1902533	positive regulation of intracellular signal transduction	10	959	0.51	0.0097	9606.ENSP00000265572,9606.ENSP00000276198,9606.ENSP00000294117,9606.ENSP00000296140,9606.ENSP00000340944,9606.ENSP00000348461,9606.ENSP00000354558,9606.ENSP00000386069,9606.ENSP00000442982,9606.ENSP00000451828	OPRK1,HTR2C,GNG3,CCR1,PTPN11,RAC1,MTOR,ADRA2C,GPR17,AKT1
GO:0033604	negative regulation of catecholamine secretion	2	13	1.68	0.0102	9606.ENSP00000358513,9606.ENSP00000386069	CNR1,ADRA2C
GO:0071073	positive regulation of phospholipid biosynthetic process	2	13	1.68	0.0102	9606.ENSP00000276198,9606.ENSP00000283296	HTR2C,GPR116
GO:1903960	negative regulation of anion transmembrane transport	2	13	1.68	0.0102	9606.ENSP00000354558,9606.ENSP00000451828	MTOR,AKT1
GO:0007611	learning or memory	5	237	0.82	0.0104	9606.ENSP00000254976,9606.ENSP00000265572,9606.ENSP00000354558,9606.ENSP00000358513,9606.ENSP00000386229	SNAP25,OPRK1,MTOR,CNR1,RGS14
GO:0007264	small GTPase mediated signal transduction	5	239	0.81	0.0105	9606.ENSP00000260746,9606.ENSP00000320038,9606.ENSP00000348461,9606.ENSP00000355651,9606.ENSP00000471457	ARL3,ARHGAP33,RAC1,RAB4A,MYO9B
GO:0022409	positive regulation of cell-cell adhesion	5	238	0.81	0.0105	9606.ENSP00000340944,9606.ENSP00000344220,9606.ENSP00000348461,9606.ENSP00000421280,9606.ENSP00000451828	PTPN11,PDPK1,RAC1,MYO10,AKT1
GO:0060135	maternal process involved in female pregnancy	3	60	1.19	0.0105	9606.ENSP00000354558,9606.ENSP00000358513,9606.ENSP00000451828	MTOR,CNR1,AKT1
GO:2000145	regulation of cell motility	9	807	0.54	0.0105	9606.ENSP00000296140,9606.ENSP00000303325,9606.ENSP00000331600,9606.ENSP00000344220,9606.ENSP00000344666,9606.ENSP00000348461,9606.ENSP00000354558,9606.ENSP00000394496,9606.ENSP00000451828	CCR1,TACR3,GPR173,PDPK1,NF2,RAC1,MTOR,CORO1C,AKT1
GO:0045986	negative regulation of smooth muscle contraction	2	14	1.65	0.011	9606.ENSP00000386069,9606.ENSP00000386972	ADRA2C,CALCRL
GO:0006112	energy reserve metabolic process	3	62	1.18	0.0111	9606.ENSP00000283296,9606.ENSP00000354558,9606.ENSP00000451828	GPR116,MTOR,AKT1
GO:0022407	regulation of cell-cell adhesion	6	366	0.71	0.0112	9606.ENSP00000340944,9606.ENSP00000344220,9606.ENSP00000344666,9606.ENSP00000348461,9606.ENSP00000421280,9606.ENSP00000451828	PTPN11,PDPK1,NF2,RAC1,MYO10,AKT1
GO:0040017	positive regulation of locomotion	7	503	0.64	0.0112	9606.ENSP00000265572,9606.ENSP00000296140,9606.ENSP00000303325,9606.ENSP00000344220,9606.ENSP00000348461,9606.ENSP00000354558,9606.ENSP00000451828	OPRK1,CCR1,TACR3,PDPK1,RAC1,MTOR,AKT1
GO:0008356	asymmetric cell division	2	15	1.62	0.0123	9606.ENSP00000264710,9606.ENSP00000386229	RAB10,RGS14
GO:0019216	regulation of lipid metabolic process	6	373	0.7	0.0123	9606.ENSP00000229264,9606.ENSP00000276198,9606.ENSP00000283296,9606.ENSP00000354558,9606.ENSP00000358513,9606.ENSP00000451828	GNB3,HTR2C,GPR116,MTOR,CNR1,AKT1
GO:0045785	positive regulation of cell adhesion	6	375	0.7	0.0125	9606.ENSP00000332591,9606.ENSP00000340944,9606.ENSP00000344220,9606.ENSP00000348461,9606.ENSP00000421280,9606.ENSP00000451828	NPY2R,PTPN11,PDPK1,RAC1,MYO10,AKT1
GO:0007399	nervous system development	16	2206	0.35	0.0126	9606.ENSP00000254976,9606.ENSP00000260746,9606.ENSP00000264710,9606.ENSP00000300935,9606.ENSP00000320038,9606.ENSP00000331600,9606.ENSP00000340944,9606.ENSP00000344666,9606.ENSP00000348461,9606.ENSP00000354558,9606.ENSP00000354791,9606.ENSP00000358513,9606.ENSP00000386069,9606.ENSP00000386229,9606.ENSP00000437489,9606.ENSP00000451828	SNAP25,ARL3,RAB10,RAB8A,ARHGAP33,GPR173,PTPN11,NF2,RAC1,MTOR,DCTN1,CNR1,ADRA2C,RGS14,FZD3,AKT1
GO:0043270	positive regulation of ion transport	5	252	0.79	0.0126	9606.ENSP00000265572,9606.ENSP00000296140,9606.ENSP00000332591,9606.ENSP00000344220,9606.ENSP00000451828	OPRK1,CCR1,NPY2R,PDPK1,AKT1
GO:0006469	negative regulation of protein kinase activity	5	254	0.79	0.013	9606.ENSP00000344220,9606.ENSP00000344666,9606.ENSP00000386229,9606.ENSP00000394496,9606.ENSP00000451828	PDPK1,NF2,RGS14,CORO1C,AKT1
GO:0007568	aging	5	255	0.78	0.0131	9606.ENSP00000303325,9606.ENSP00000332591,9606.ENSP00000354558,9606.ENSP00000358513,9606.ENSP00000451828	TACR3,NPY2R,MTOR,CNR1,AKT1
GO:0045670	regulation of osteoclast differentiation	3	67	1.14	0.0131	9606.ENSP00000294954,9606.ENSP00000296140,9606.ENSP00000354558	LHCGR,CCR1,MTOR
GO:0030705	cytoskeleton-dependent intracellular transport	4	151	0.92	0.0137	9606.ENSP00000260746,9606.ENSP00000264712,9606.ENSP00000354791,9606.ENSP00000421280	ARL3,KIF3C,DCTN1,MYO10
GO:0001775	cell activation	10	1024	0.48	0.0139	9606.ENSP00000254976,9606.ENSP00000262958,9606.ENSP00000264710,9606.ENSP00000292174,9606.ENSP00000314214,9606.ENSP00000340944,9606.ENSP00000344220,9606.ENSP00000348461,9606.ENSP00000354558,9606.ENSP00000386069	SNAP25,GNA15,RAB10,CXCR5,VAMP2,PTPN11,PDPK1,RAC1,MTOR,ADRA2C
GO:0099632	protein transport within plasma membrane	2	17	1.56	0.0146	9606.ENSP00000254976,9606.ENSP00000300935	SNAP25,RAB8A
GO:1903524	positive regulation of blood circulation	3	70	1.12	0.0146	9606.ENSP00000303325,9606.ENSP00000386069,9606.ENSP00000451828	TACR3,ADRA2C,AKT1
GO:0031338	regulation of vesicle fusion	3	71	1.12	0.015	9606.ENSP00000221543,9606.ENSP00000362751,9606.ENSP00000481721	TBC1D17,RABGAP1,TBC1D2
GO:0008361	regulation of cell size	4	159	0.89	0.0159	9606.ENSP00000229264,9606.ENSP00000348461,9606.ENSP00000354558,9606.ENSP00000451828	GNB3,RAC1,MTOR,AKT1
GO:0010592	positive regulation of lamellipodium assembly	2	18	1.54	0.0159	9606.ENSP00000348461,9606.ENSP00000354558	RAC1,MTOR
GO:0010647	positive regulation of cell communication	13	1631	0.39	0.0159	9606.ENSP00000254976,9606.ENSP00000265572,9606.ENSP00000276198,9606.ENSP00000294117,9606.ENSP00000296140,9606.ENSP00000314214,9606.ENSP00000340944,9606.ENSP00000348461,9606.ENSP00000354558,9606.ENSP00000386069,9606.ENSP00000386229,9606.ENSP00000442982,9606.ENSP00000451828	SNAP25,OPRK1,HTR2C,GNG3,CCR1,VAMP2,PTPN11,RAC1,MTOR,ADRA2C,RGS14,GPR17,AKT1
GO:0140056	organelle localization by membrane tethering	4	159	0.89	0.0159	9606.ENSP00000254976,9606.ENSP00000264710,9606.ENSP00000300935,9606.ENSP00000354791	SNAP25,RAB10,RAB8A,DCTN1
GO:0009611	response to wounding	7	547	0.6	0.0161	9606.ENSP00000262958,9606.ENSP00000296140,9606.ENSP00000340944,9606.ENSP00000344220,9606.ENSP00000348461,9606.ENSP00000354558,9606.ENSP00000386069	GNA15,CCR1,PTPN11,PDPK1,RAC1,MTOR,ADRA2C
GO:0009628	response to abiotic stimulus	10	1052	0.47	0.0161	9606.ENSP00000265572,9606.ENSP00000303325,9606.ENSP00000333547,9606.ENSP00000340944,9606.ENSP00000344220,9606.ENSP00000348461,9606.ENSP00000354558,9606.ENSP00000386229,9606.ENSP00000437489,9606.ENSP00000451828	OPRK1,TACR3,RAB11B,PTPN11,PDPK1,RAC1,MTOR,RGS14,FZD3,AKT1
GO:0023056	positive regulation of signaling	13	1638	0.39	0.0163	9606.ENSP00000254976,9606.ENSP00000265572,9606.ENSP00000276198,9606.ENSP00000294117,9606.ENSP00000296140,9606.ENSP00000314214,9606.ENSP00000340944,9606.ENSP00000348461,9606.ENSP00000354558,9606.ENSP00000386069,9606.ENSP00000386229,9606.ENSP00000442982,9606.ENSP00000451828	SNAP25,OPRK1,HTR2C,GNG3,CCR1,VAMP2,PTPN11,RAC1,MTOR,ADRA2C,RGS14,GPR17,AKT1
GO:1903725	regulation of phospholipid metabolic process	3	75	1.09	0.0166	9606.ENSP00000229264,9606.ENSP00000276198,9606.ENSP00000283296	GNB3,HTR2C,GPR116
GO:0120032	regulation of plasma membrane bounded cell projection assembly	4	163	0.88	0.0167	9606.ENSP00000348461,9606.ENSP00000354558,9606.ENSP00000394496,9606.ENSP00000421280	RAC1,MTOR,CORO1C,MYO10
GO:0009743	response to carbohydrate	4	164	0.88	0.017	9606.ENSP00000265572,9606.ENSP00000314214,9606.ENSP00000333547,9606.ENSP00000386972	OPRK1,VAMP2,RAB11B,CALCRL
GO:0071322	cellular response to carbohydrate stimulus	3	76	1.09	0.0171	9606.ENSP00000265572,9606.ENSP00000333547,9606.ENSP00000386972	OPRK1,RAB11B,CALCRL
GO:0051128	regulation of cellular component organization	16	2306	0.33	0.0179	9606.ENSP00000221543,9606.ENSP00000254976,9606.ENSP00000320038,9606.ENSP00000340944,9606.ENSP00000344666,9606.ENSP00000348461,9606.ENSP00000354558,9606.ENSP00000354791,9606.ENSP00000355651,9606.ENSP00000358513,9606.ENSP00000362751,9606.ENSP00000394496,9606.ENSP00000421280,9606.ENSP00000440005,9606.ENSP00000451828,9606.ENSP00000481721	TBC1D17,SNAP25,ARHGAP33,PTPN11,NF2,RAC1,MTOR,DCTN1,RAB4A,CNR1,RABGAP1,CORO1C,MYO10,ARF1,AKT1,TBC1D2
GO:0071260	cellular response to mechanical stimulus	3	78	1.08	0.0181	9606.ENSP00000340944,9606.ENSP00000348461,9606.ENSP00000451828	PTPN11,RAC1,AKT1
GO:2000026	regulation of multicellular organismal development	14	1876	0.37	0.0181	9606.ENSP00000254976,9606.ENSP00000294954,9606.ENSP00000296140,9606.ENSP00000320038,9606.ENSP00000331600,9606.ENSP00000344220,9606.ENSP00000344666,9606.ENSP00000348461,9606.ENSP00000354558,9606.ENSP00000358513,9606.ENSP00000386069,9606.ENSP00000386229,9606.ENSP00000437489,9606.ENSP00000451828	SNAP25,LHCGR,CCR1,ARHGAP33,GPR173,PDPK1,NF2,RAC1,MTOR,CNR1,ADRA2C,RGS14,FZD3,AKT1
GO:0017157	regulation of exocytosis	4	169	0.87	0.0184	9606.ENSP00000264710,9606.ENSP00000300935,9606.ENSP00000314214,9606.ENSP00000344220	RAB10,RAB8A,VAMP2,PDPK1
GO:0018107	peptidyl-threonine phosphorylation	3	80	1.07	0.019	9606.ENSP00000344220,9606.ENSP00000354558,9606.ENSP00000451828	PDPK1,MTOR,AKT1
GO:0048661	positive regulation of smooth muscle cell proliferation	3	80	1.07	0.019	9606.ENSP00000354558,9606.ENSP00000386972,9606.ENSP00000451828	MTOR,CALCRL,AKT1
GO:0001933	negative regulation of protein phosphorylation	6	422	0.65	0.0193	9606.ENSP00000344220,9606.ENSP00000344666,9606.ENSP00000354558,9606.ENSP00000386229,9606.ENSP00000394496,9606.ENSP00000451828	PDPK1,NF2,MTOR,RGS14,CORO1C,AKT1
GO:0007596	blood coagulation	5	288	0.73	0.0193	9606.ENSP00000262958,9606.ENSP00000340944,9606.ENSP00000344220,9606.ENSP00000348461,9606.ENSP00000386069	GNA15,PTPN11,PDPK1,RAC1,ADRA2C
GO:0050796	regulation of insulin secretion	4	172	0.86	0.0193	9606.ENSP00000254976,9606.ENSP00000340944,9606.ENSP00000358513,9606.ENSP00000386069	SNAP25,PTPN11,CNR1,ADRA2C
GO:0051640	organelle localization	7	574	0.58	0.0196	9606.ENSP00000254976,9606.ENSP00000264710,9606.ENSP00000264712,9606.ENSP00000300935,9606.ENSP00000314214,9606.ENSP00000333547,9606.ENSP00000354791	SNAP25,RAB10,KIF3C,RAB8A,VAMP2,RAB11B,DCTN1
GO:0002861	regulation of inflammatory response to antigenic stimulus	2	22	1.45	0.0205	9606.ENSP00000358513,9606.ENSP00000442982	CNR1,GPR17
GO:0008217	regulation of blood pressure	4	177	0.85	0.0205	9606.ENSP00000229264,9606.ENSP00000303325,9606.ENSP00000358513,9606.ENSP00000383558	GNB3,TACR3,CNR1,GCGR
GO:0032402	melanosome transport	2	22	1.45	0.0205	9606.ENSP00000333547,9606.ENSP00000354791	RAB11B,DCTN1
GO:0043255	regulation of carbohydrate biosynthetic process	3	83	1.05	0.0205	9606.ENSP00000294954,9606.ENSP00000354558,9606.ENSP00000451828	LHCGR,MTOR,AKT1
GO:0048468	cell development	12	1493	0.4	0.0205	9606.ENSP00000260746,9606.ENSP00000264710,9606.ENSP00000283296,9606.ENSP00000300935,9606.ENSP00000340944,9606.ENSP00000344220,9606.ENSP00000348461,9606.ENSP00000354558,9606.ENSP00000358513,9606.ENSP00000394496,9606.ENSP00000437489,9606.ENSP00000451828	ARL3,RAB10,GPR116,RAB8A,PTPN11,PDPK1,RAC1,MTOR,CNR1,CORO1C,FZD3,AKT1
GO:0032465	regulation of cytokinesis	3	84	1.05	0.0207	9606.ENSP00000262305,9606.ENSP00000292174,9606.ENSP00000371377	RAB11FIP3,CXCR5,OR1A2
GO:0006972	hyperosmotic response	2	23	1.43	0.0216	9606.ENSP00000303325,9606.ENSP00000344220	TACR3,PDPK1
GO:0030334	regulation of cell migration	8	753	0.52	0.0216	9606.ENSP00000296140,9606.ENSP00000331600,9606.ENSP00000344220,9606.ENSP00000344666,9606.ENSP00000348461,9606.ENSP00000354558,9606.ENSP00000394496,9606.ENSP00000451828	CCR1,GPR173,PDPK1,NF2,RAC1,MTOR,CORO1C,AKT1
GO:0031529	ruffle organization	2	23	1.43	0.0216	9606.ENSP00000348461,9606.ENSP00000354558	RAC1,MTOR
GO:1902905	positive regulation of supramolecular fiber organization	4	180	0.84	0.0216	9606.ENSP00000344666,9606.ENSP00000348461,9606.ENSP00000354558,9606.ENSP00000354791	NF2,RAC1,MTOR,DCTN1
GO:1990778	protein localization to cell periphery	4	181	0.84	0.0216	9606.ENSP00000254976,9606.ENSP00000264710,9606.ENSP00000300935,9606.ENSP00000314214	SNAP25,RAB10,RAB8A,VAMP2
GO:0007626	locomotory behavior	4	184	0.83	0.0226	9606.ENSP00000254976,9606.ENSP00000265572,9606.ENSP00000276198,9606.ENSP00000332591	SNAP25,OPRK1,HTR2C,NPY2R
GO:0043001	Golgi to plasma membrane protein transport	2	24	1.41	0.0226	9606.ENSP00000264710,9606.ENSP00000314214	RAB10,VAMP2
GO:0071496	cellular response to external stimulus	5	305	0.71	0.0226	9606.ENSP00000258662,9606.ENSP00000340944,9606.ENSP00000348461,9606.ENSP00000354558,9606.ENSP00000451828	NUDT15,PTPN11,RAC1,MTOR,AKT1
GO:0001938	positive regulation of endothelial cell proliferation	3	89	1.02	0.0229	9606.ENSP00000344220,9606.ENSP00000354558,9606.ENSP00000451828	PDPK1,MTOR,AKT1
GO:0006887	exocytosis	8	774	0.51	0.0239	9606.ENSP00000254976,9606.ENSP00000264710,9606.ENSP00000296140,9606.ENSP00000300935,9606.ENSP00000314214,9606.ENSP00000333547,9606.ENSP00000348461,9606.ENSP00000383558	SNAP25,RAB10,CCR1,RAB8A,VAMP2,RAB11B,RAC1,GCGR
GO:0010810	regulation of cell-substrate adhesion	4	189	0.82	0.0239	9606.ENSP00000332591,9606.ENSP00000344666,9606.ENSP00000348461,9606.ENSP00000394496	NPY2R,NF2,RAC1,CORO1C
GO:0044070	regulation of anion transport	3	91	1.01	0.0239	9606.ENSP00000333547,9606.ENSP00000354558,9606.ENSP00000451828	RAB11B,MTOR,AKT1
GO:0048522	positive regulation of cellular process	26	4898	0.22	0.0241	9606.ENSP00000254976,9606.ENSP00000265572,9606.ENSP00000276198,9606.ENSP00000283296,9606.ENSP00000292174,9606.ENSP00000294117,9606.ENSP00000294954,9606.ENSP00000296140,9606.ENSP00000303325,9606.ENSP00000314214,9606.ENSP00000332591,9606.ENSP00000340944,9606.ENSP00000344220,9606.ENSP00000344666,9606.ENSP00000348461,9606.ENSP00000354558,9606.ENSP00000354791,9606.ENSP00000358513,9606.ENSP00000371377,…	SNAP25,OPRK1,HTR2C,GPR116,CXCR5,GNG3,LHCGR,CCR1,TACR3,VAMP2,NPY2R,PTPN11,PDPK1,NF2,RAC1,MTOR,DCTN1,CNR1,OR1A2,ADRA2C,RGS14,CALCRL,CORO1C,FZD3,GPR17,AKT1
GO:0010762	regulation of fibroblast migration	2	26	1.38	0.025	9606.ENSP00000394496,9606.ENSP00000451828	CORO1C,AKT1
GO:0031929	TOR signaling	2	26	1.38	0.025	9606.ENSP00000354558,9606.ENSP00000451828	MTOR,AKT1
GO:0032271	regulation of protein polymerization	4	192	0.81	0.025	9606.ENSP00000348461,9606.ENSP00000354558,9606.ENSP00000354791,9606.ENSP00000440005	RAC1,MTOR,DCTN1,ARF1
GO:0034764	positive regulation of transmembrane transport	4	194	0.81	0.025	9606.ENSP00000265572,9606.ENSP00000340944,9606.ENSP00000344220,9606.ENSP00000451828	OPRK1,PTPN11,PDPK1,AKT1
GO:0051668	localization within membrane	3	94	1	0.025	9606.ENSP00000254976,9606.ENSP00000300935,9606.ENSP00000348461	SNAP25,RAB8A,RAC1
GO:1902903	regulation of supramolecular fiber organization	5	316	0.69	0.025	9606.ENSP00000344666,9606.ENSP00000348461,9606.ENSP00000354558,9606.ENSP00000354791,9606.ENSP00000440005	NF2,RAC1,MTOR,DCTN1,ARF1
GO:2001025	positive regulation of response to drug	2	26	1.38	0.025	9606.ENSP00000265572,9606.ENSP00000332591	OPRK1,NPY2R
GO:0042060	wound healing	6	461	0.61	0.0251	9606.ENSP00000262958,9606.ENSP00000340944,9606.ENSP00000344220,9606.ENSP00000348461,9606.ENSP00000354558,9606.ENSP00000386069	GNA15,PTPN11,PDPK1,RAC1,MTOR,ADRA2C
GO:0048731	system development	23	4144	0.24	0.0253	9606.ENSP00000254976,9606.ENSP00000260746,9606.ENSP00000264710,9606.ENSP00000283296,9606.ENSP00000292174,9606.ENSP00000294954,9606.ENSP00000300935,9606.ENSP00000320038,9606.ENSP00000331600,9606.ENSP00000332591,9606.ENSP00000340944,9606.ENSP00000344220,9606.ENSP00000344666,9606.ENSP00000348461,9606.ENSP00000354558,9606.ENSP00000354791,9606.ENSP00000358513,9606.ENSP00000386069,9606.ENSP00000386229,…	SNAP25,ARL3,RAB10,GPR116,CXCR5,LHCGR,RAB8A,ARHGAP33,GPR173,NPY2R,PTPN11,PDPK1,NF2,RAC1,MTOR,DCTN1,CNR1,ADRA2C,RGS14,CALCRL,CORO1C,FZD3,AKT1
GO:0006906	vesicle fusion	3	95	0.99	0.0254	9606.ENSP00000254976,9606.ENSP00000300935,9606.ENSP00000314214	SNAP25,RAB8A,VAMP2
GO:0031116	positive regulation of microtubule polymerization	2	27	1.36	0.0254	9606.ENSP00000348461,9606.ENSP00000354791	RAC1,DCTN1
GO:0032369	negative regulation of lipid transport	2	27	1.36	0.0254	9606.ENSP00000340944,9606.ENSP00000451828	PTPN11,AKT1
GO:0043112	receptor metabolic process	3	95	0.99	0.0254	9606.ENSP00000254976,9606.ENSP00000333547,9606.ENSP00000386972	SNAP25,RAB11B,CALCRL
GO:0051223	regulation of protein transport	7	622	0.54	0.0254	9606.ENSP00000254976,9606.ENSP00000262305,9606.ENSP00000300935,9606.ENSP00000314214,9606.ENSP00000340944,9606.ENSP00000358513,9606.ENSP00000386069	SNAP25,RAB11FIP3,RAB8A,VAMP2,PTPN11,CNR1,ADRA2C
GO:0090066	regulation of anatomical structure size	6	464	0.6	0.0254	9606.ENSP00000229264,9606.ENSP00000348461,9606.ENSP00000354558,9606.ENSP00000386069,9606.ENSP00000440005,9606.ENSP00000451828	GNB3,RAC1,MTOR,ADRA2C,ARF1,AKT1
GO:1903827	regulation of cellular protein localization	6	465	0.6	0.0256	9606.ENSP00000314214,9606.ENSP00000333547,9606.ENSP00000340944,9606.ENSP00000344220,9606.ENSP00000344666,9606.ENSP00000451828	VAMP2,RAB11B,PTPN11,PDPK1,NF2,AKT1
GO:0034613	cellular protein localization	11	1367	0.4	0.0264	9606.ENSP00000221543,9606.ENSP00000254976,9606.ENSP00000260746,9606.ENSP00000264710,9606.ENSP00000264712,9606.ENSP00000300935,9606.ENSP00000314214,9606.ENSP00000333547,9606.ENSP00000362751,9606.ENSP00000451828,9606.ENSP00000481721	TBC1D17,SNAP25,ARL3,RAB10,KIF3C,RAB8A,VAMP2,RAB11B,RABGAP1,AKT1,TBC1D2
GO:2000147	positive regulation of cell motility	6	469	0.6	0.0265	9606.ENSP00000296140,9606.ENSP00000303325,9606.ENSP00000344220,9606.ENSP00000348461,9606.ENSP00000354558,9606.ENSP00000451828	CCR1,TACR3,PDPK1,RAC1,MTOR,AKT1
GO:0002694	regulation of leukocyte activation	6	470	0.6	0.0267	9606.ENSP00000283296,9606.ENSP00000340944,9606.ENSP00000344220,9606.ENSP00000348461,9606.ENSP00000358513,9606.ENSP00000451828	GPR116,PTPN11,PDPK1,RAC1,CNR1,AKT1
GO:0035025	positive regulation of Rho protein signal transduction	2	28	1.35	0.0267	9606.ENSP00000348461,9606.ENSP00000442982	RAC1,GPR17
GO:0051495	positive regulation of cytoskeleton organization	4	203	0.79	0.0277	9606.ENSP00000344666,9606.ENSP00000348461,9606.ENSP00000354558,9606.ENSP00000354791	NF2,RAC1,MTOR,DCTN1
GO:0005979	regulation of glycogen biosynthetic process	2	29	1.33	0.0279	9606.ENSP00000354558,9606.ENSP00000451828	MTOR,AKT1
GO:2001024	negative regulation of response to drug	2	29	1.33	0.0279	9606.ENSP00000340944,9606.ENSP00000358513	PTPN11,CNR1
GO:0032535	regulation of cellular component size	5	333	0.67	0.0284	9606.ENSP00000229264,9606.ENSP00000348461,9606.ENSP00000354558,9606.ENSP00000440005,9606.ENSP00000451828	GNB3,RAC1,MTOR,ARF1,AKT1
GO:0002682	regulation of immune system process	11	1391	0.39	0.029	9606.ENSP00000283296,9606.ENSP00000294954,9606.ENSP00000296140,9606.ENSP00000340944,9606.ENSP00000344220,9606.ENSP00000348461,9606.ENSP00000354558,9606.ENSP00000358513,9606.ENSP00000421280,9606.ENSP00000442982,9606.ENSP00000451828	GPR116,LHCGR,CCR1,PTPN11,PDPK1,RAC1,MTOR,CNR1,MYO10,GPR17,AKT1
GO:0001662	behavioral fear response	2	30	1.32	0.0291	9606.ENSP00000276198,9606.ENSP00000332591	HTR2C,NPY2R
GO:0021510	spinal cord development	3	103	0.96	0.0291	9606.ENSP00000354558,9606.ENSP00000354791,9606.ENSP00000451828	MTOR,DCTN1,AKT1
GO:0050690	regulation of defense response to virus by virus	2	30	1.32	0.0291	9606.ENSP00000348461,9606.ENSP00000440005	RAC1,ARF1
GO:0050878	regulation of body fluid levels	6	483	0.59	0.0291	9606.ENSP00000262958,9606.ENSP00000265572,9606.ENSP00000340944,9606.ENSP00000344220,9606.ENSP00000348461,9606.ENSP00000386069	GNA15,OPRK1,PTPN11,PDPK1,RAC1,ADRA2C
GO:0009991	response to extracellular stimulus	6	486	0.58	0.0294	9606.ENSP00000258662,9606.ENSP00000276198,9606.ENSP00000354558,9606.ENSP00000358513,9606.ENSP00000383558,9606.ENSP00000451828	NUDT15,HTR2C,MTOR,CNR1,GCGR,AKT1
GO:0010632	regulation of epithelial cell migration	4	209	0.77	0.0294	9606.ENSP00000344220,9606.ENSP00000354558,9606.ENSP00000394496,9606.ENSP00000451828	PDPK1,MTOR,CORO1C,AKT1
GO:0016242	negative regulation of macroautophagy	2	31	1.3	0.0301	9606.ENSP00000354558,9606.ENSP00000451828	MTOR,AKT1
GO:0001952	regulation of cell-matrix adhesion	3	105	0.95	0.0303	9606.ENSP00000344666,9606.ENSP00000348461,9606.ENSP00000394496	NF2,RAC1,CORO1C
GO:0006935	chemotaxis	6	491	0.58	0.0306	9606.ENSP00000292174,9606.ENSP00000296140,9606.ENSP00000340944,9606.ENSP00000348461,9606.ENSP00000349967,9606.ENSP00000437489	CXCR5,CCR1,PTPN11,RAC1,CCRL2,FZD3
GO:0010720	positive regulation of cell development	6	491	0.58	0.0306	9606.ENSP00000348461,9606.ENSP00000354558,9606.ENSP00000358513,9606.ENSP00000386069,9606.ENSP00000386229,9606.ENSP00000437489	RAC1,MTOR,CNR1,ADRA2C,RGS14,FZD3
GO:0019221	cytokine-mediated signaling pathway	7	655	0.52	0.0307	9606.ENSP00000292174,9606.ENSP00000296140,9606.ENSP00000340944,9606.ENSP00000349967,9606.ENSP00000440005,9606.ENSP00000442982,9606.ENSP00000451828	CXCR5,CCR1,PTPN11,CCRL2,ARF1,GPR17,AKT1
GO:0048584	positive regulation of response to stimulus	14	2054	0.33	0.0307	9606.ENSP00000265572,9606.ENSP00000276198,9606.ENSP00000294117,9606.ENSP00000296140,9606.ENSP00000332591,9606.ENSP00000340944,9606.ENSP00000344220,9606.ENSP00000348461,9606.ENSP00000354558,9606.ENSP00000358513,9606.ENSP00000386069,9606.ENSP00000421280,9606.ENSP00000442982,9606.ENSP00000451828	OPRK1,HTR2C,GNG3,CCR1,NPY2R,PTPN11,PDPK1,RAC1,MTOR,CNR1,ADRA2C,MYO10,GPR17,AKT1
GO:0030029	actin filament-based process	6	493	0.58	0.0308	9606.ENSP00000344220,9606.ENSP00000344666,9606.ENSP00000348461,9606.ENSP00000376132,9606.ENSP00000394496,9606.ENSP00000471457	PDPK1,NF2,RAC1,MYO1B,CORO1C,MYO9B
GO:0006886	intracellular protein transport	8	836	0.47	0.0317	9606.ENSP00000221543,9606.ENSP00000254976,9606.ENSP00000260746,9606.ENSP00000264712,9606.ENSP00000300935,9606.ENSP00000362751,9606.ENSP00000451828,9606.ENSP00000481721	TBC1D17,SNAP25,ARL3,KIF3C,RAB8A,RABGAP1,AKT1,TBC1D2
GO:0007613	memory	3	109	0.93	0.0327	9606.ENSP00000354558,9606.ENSP00000358513,9606.ENSP00000386229	MTOR,CNR1,RGS14
GO:0001953	negative regulation of cell-matrix adhesion	2	33	1.27	0.0328	9606.ENSP00000344666,9606.ENSP00000394496	NF2,CORO1C
GO:0045742	positive regulation of epidermal growth factor receptor signaling pathway	2	33	1.27	0.0328	9606.ENSP00000386069,9606.ENSP00000451828	ADRA2C,AKT1
GO:0045907	positive regulation of vasoconstriction	2	33	1.27	0.0328	9606.ENSP00000386069,9606.ENSP00000451828	ADRA2C,AKT1
GO:0045987	positive regulation of smooth muscle contraction	2	33	1.27	0.0328	9606.ENSP00000303325,9606.ENSP00000332591	TACR3,NPY2R
GO:0051650	establishment of vesicle localization	4	218	0.76	0.0328	9606.ENSP00000254976,9606.ENSP00000314214,9606.ENSP00000333547,9606.ENSP00000354791	SNAP25,VAMP2,RAB11B,DCTN1
GO:0007616	long-term memory	2	34	1.26	0.0341	9606.ENSP00000354558,9606.ENSP00000386229	MTOR,RGS14
GO:0031641	regulation of myelination	2	34	1.26	0.0341	9606.ENSP00000354558,9606.ENSP00000451828	MTOR,AKT1
GO:0048008	platelet-derived growth factor receptor signaling pathway	2	34	1.26	0.0341	9606.ENSP00000340944,9606.ENSP00000386229	PTPN11,RGS14
GO:0032273	positive regulation of protein polymerization	3	112	0.92	0.0342	9606.ENSP00000348461,9606.ENSP00000354558,9606.ENSP00000354791	RAC1,MTOR,DCTN1
GO:0031503	protein-containing complex localization	4	223	0.75	0.0344	9606.ENSP00000254976,9606.ENSP00000260746,9606.ENSP00000264712,9606.ENSP00000300935	SNAP25,ARL3,KIF3C,RAB8A
GO:0043410	positive regulation of MAPK cascade	6	512	0.56	0.0353	9606.ENSP00000265572,9606.ENSP00000276198,9606.ENSP00000294117,9606.ENSP00000296140,9606.ENSP00000340944,9606.ENSP00000386069	OPRK1,HTR2C,GNG3,CCR1,PTPN11,ADRA2C
GO:0010959	regulation of metal ion transport	5	360	0.63	0.0354	9606.ENSP00000265572,9606.ENSP00000296140,9606.ENSP00000314214,9606.ENSP00000344220,9606.ENSP00000451828	OPRK1,CCR1,VAMP2,PDPK1,AKT1
GO:0044087	regulation of cellular component biogenesis	8	867	0.46	0.0368	9606.ENSP00000340944,9606.ENSP00000344666,9606.ENSP00000348461,9606.ENSP00000354558,9606.ENSP00000354791,9606.ENSP00000394496,9606.ENSP00000421280,9606.ENSP00000440005	PTPN11,NF2,RAC1,MTOR,DCTN1,CORO1C,MYO10,ARF1
GO:0106027	neuron projection organization	2	36	1.24	0.0368	9606.ENSP00000354791,9606.ENSP00000440005	DCTN1,ARF1
GO:0001738	morphogenesis of a polarized epithelium	2	37	1.22	0.0383	9606.ENSP00000264710,9606.ENSP00000437489	RAB10,FZD3
GO:0034762	regulation of transmembrane transport	6	524	0.55	0.0383	9606.ENSP00000265572,9606.ENSP00000314214,9606.ENSP00000340944,9606.ENSP00000344220,9606.ENSP00000354558,9606.ENSP00000451828	OPRK1,VAMP2,PTPN11,PDPK1,MTOR,AKT1
GO:0045777	positive regulation of blood pressure	2	37	1.22	0.0383	9606.ENSP00000303325,9606.ENSP00000358513	TACR3,CNR1
GO:2000008	regulation of protein localization to cell surface	2	37	1.22	0.0383	9606.ENSP00000333547,9606.ENSP00000451828	RAB11B,AKT1
GO:0046903	secretion	9	1070	0.42	0.0394	9606.ENSP00000254976,9606.ENSP00000264710,9606.ENSP00000296140,9606.ENSP00000300935,9606.ENSP00000314214,9606.ENSP00000332591,9606.ENSP00000333547,9606.ENSP00000348461,9606.ENSP00000383558	SNAP25,RAB10,CCR1,RAB8A,VAMP2,NPY2R,RAB11B,RAC1,GCGR
GO:0110053	regulation of actin filament organization	4	235	0.72	0.0395	9606.ENSP00000344666,9606.ENSP00000348461,9606.ENSP00000354558,9606.ENSP00000440005	NF2,RAC1,MTOR,ARF1
GO:0031018	endocrine pancreas development	2	38	1.21	0.0396	9606.ENSP00000344220,9606.ENSP00000451828	PDPK1,AKT1
GO:0032467	positive regulation of cytokinesis	2	38	1.21	0.0396	9606.ENSP00000292174,9606.ENSP00000371377	CXCR5,OR1A2
GO:1904036	negative regulation of epithelial cell apoptotic process	2	38	1.21	0.0396	9606.ENSP00000344220,9606.ENSP00000354558	PDPK1,MTOR
GO:0048585	negative regulation of response to stimulus	11	1483	0.36	0.0402	9606.ENSP00000332591,9606.ENSP00000340944,9606.ENSP00000344220,9606.ENSP00000344666,9606.ENSP00000354558,9606.ENSP00000355523,9606.ENSP00000358513,9606.ENSP00000386229,9606.ENSP00000386972,9606.ENSP00000442982,9606.ENSP00000451828	NPY2R,PTPN11,PDPK1,NF2,MTOR,RGS7,CNR1,RGS14,CALCRL,GPR17,AKT1
GO:0061564	axon development	5	377	0.61	0.0407	9606.ENSP00000264710,9606.ENSP00000300935,9606.ENSP00000340944,9606.ENSP00000358513,9606.ENSP00000437489	RAB10,RAB8A,PTPN11,CNR1,FZD3
GO:0009605	response to external stimulus	14	2152	0.31	0.0414	9606.ENSP00000258662,9606.ENSP00000265572,9606.ENSP00000276198,9606.ENSP00000292174,9606.ENSP00000296140,9606.ENSP00000340944,9606.ENSP00000348461,9606.ENSP00000349967,9606.ENSP00000354558,9606.ENSP00000358513,9606.ENSP00000383558,9606.ENSP00000437489,9606.ENSP00000440005,9606.ENSP00000451828	NUDT15,OPRK1,HTR2C,CXCR5,CCR1,PTPN11,RAC1,CCRL2,MTOR,CNR1,GCGR,FZD3,ARF1,AKT1
GO:0048518	positive regulation of biological process	27	5459	0.19	0.0414	9606.ENSP00000254976,9606.ENSP00000265572,9606.ENSP00000276198,9606.ENSP00000283296,9606.ENSP00000292174,9606.ENSP00000294117,9606.ENSP00000294954,9606.ENSP00000296140,9606.ENSP00000303325,9606.ENSP00000314214,9606.ENSP00000332591,9606.ENSP00000340944,9606.ENSP00000344220,9606.ENSP00000344666,9606.ENSP00000348461,9606.ENSP00000354558,9606.ENSP00000354791,9606.ENSP00000358513,9606.ENSP00000371377,…	SNAP25,OPRK1,HTR2C,GPR116,CXCR5,GNG3,LHCGR,CCR1,TACR3,VAMP2,NPY2R,PTPN11,PDPK1,NF2,RAC1,MTOR,DCTN1,CNR1,OR1A2,ADRA2C,RGS14,CALCRL,CORO1C,MYO10,FZD3,GPR17,AKT1
GO:0033003	regulation of mast cell activation	2	40	1.19	0.0426	9606.ENSP00000344220,9606.ENSP00000358513	PDPK1,CNR1
GO:0038093	Fc receptor signaling pathway	3	126	0.87	0.0435	9606.ENSP00000344220,9606.ENSP00000348461,9606.ENSP00000421280	PDPK1,RAC1,MYO10
GO:0042493	response to drug	8	900	0.44	0.0435	9606.ENSP00000258662,9606.ENSP00000262958,9606.ENSP00000265572,9606.ENSP00000276198,9606.ENSP00000303325,9606.ENSP00000354558,9606.ENSP00000358513,9606.ENSP00000437489	NUDT15,GNA15,OPRK1,HTR2C,TACR3,MTOR,CNR1,FZD3
GO:0051656	establishment of organelle localization	5	387	0.6	0.0439	9606.ENSP00000254976,9606.ENSP00000264712,9606.ENSP00000314214,9606.ENSP00000333547,9606.ENSP00000354791	SNAP25,KIF3C,VAMP2,RAB11B,DCTN1
GO:0010970	transport along microtubule	3	129	0.86	0.0457	9606.ENSP00000260746,9606.ENSP00000264712,9606.ENSP00000354791	ARL3,KIF3C,DCTN1
GO:0045429	positive regulation of nitric oxide biosynthetic process	2	42	1.17	0.0457	9606.ENSP00000354558,9606.ENSP00000451828	MTOR,AKT1
GO:0030595	leukocyte chemotaxis	3	130	0.86	0.0461	9606.ENSP00000292174,9606.ENSP00000296140,9606.ENSP00000348461	CXCR5,CCR1,RAC1
GO:1905330	regulation of morphogenesis of an epithelium	3	130	0.86	0.0461	9606.ENSP00000348461,9606.ENSP00000354558,9606.ENSP00000437489	RAC1,MTOR,FZD3
GO:0035023	regulation of Rho protein signal transduction	3	131	0.85	0.0468	9606.ENSP00000348461,9606.ENSP00000442982,9606.ENSP00000471457	RAC1,GPR17,MYO9B
GO:0046326	positive regulation of glucose import	2	43	1.16	0.0468	9606.ENSP00000340944,9606.ENSP00000451828	PTPN11,AKT1
GO:0009749	response to glucose	3	133	0.85	0.0485	9606.ENSP00000265572,9606.ENSP00000314214,9606.ENSP00000333547	OPRK1,VAMP2,RAB11B
GO:1990090	cellular response to nerve growth factor stimulus	2	44	1.15	0.0486	9606.ENSP00000344220,9606.ENSP00000451828	PDPK1,AKT1
GO:0009306	protein secretion	3	134	0.84	0.0491	9606.ENSP00000264710,9606.ENSP00000300935,9606.ENSP00000333547	RAB10,RAB8A,RAB11B

## Sheet: SV2(+) Molecular Function
#term ID	term description	observed gene count	background gene count	strength	false discovery rate	matching proteins in your network (IDs)	matching proteins in your network (labels)
GO:0004930	G protein-coupled receptor activity	27	824	1.01	3.17e-18	9606.ENSP00000218316,9606.ENSP00000239032,9606.ENSP00000265572,9606.ENSP00000276198,9606.ENSP00000283296,9606.ENSP00000284674,9606.ENSP00000292174,9606.ENSP00000294954,9606.ENSP00000296140,9606.ENSP00000300098,9606.ENSP00000303325,9606.ENSP00000304419,9606.ENSP00000313803,9606.ENSP00000327417,9606.ENSP00000331600,9606.ENSP00000332068,9606.ENSP00000332591,9606.ENSP00000349967,9606.ENSP00000358513,…	GPR50,PRLHR,OPRK1,HTR2C,GPR116,GPR26,CXCR5,LHCGR,CCR1,GPR182,TACR3,OR2B2,OR3A1,GPR39,GPR173,OR5P3,NPY2R,CCRL2,CNR1,OR1A2,GCGR,ADRA2C,CALCRL,GPR141,TRHR,FZD3,GPR17
GO:0008528	G protein-coupled peptide receptor activity	11	132	1.41	5e-11	9606.ENSP00000239032,9606.ENSP00000265572,9606.ENSP00000292174,9606.ENSP00000294954,9606.ENSP00000296140,9606.ENSP00000303325,9606.ENSP00000332591,9606.ENSP00000349967,9606.ENSP00000383558,9606.ENSP00000386972,9606.ENSP00000442982	PRLHR,OPRK1,CXCR5,LHCGR,CCR1,TACR3,NPY2R,CCRL2,GCGR,CALCRL,GPR17
GO:0016462	pyrophosphatase activity	19	819	0.86	3.11e-10	9606.ENSP00000226207,9606.ENSP00000229264,9606.ENSP00000258662,9606.ENSP00000260746,9606.ENSP00000262958,9606.ENSP00000264710,9606.ENSP00000264712,9606.ENSP00000294117,9606.ENSP00000300935,9606.ENSP00000333547,9606.ENSP00000348461,9606.ENSP00000354791,9606.ENSP00000355651,9606.ENSP00000359520,9606.ENSP00000360561,9606.ENSP00000376132,9606.ENSP00000421280,9606.ENSP00000440005,9606.ENSP00000471457	MYH1,GNB3,NUDT15,ARL3,GNA15,RAB10,KIF3C,GNG3,RAB8A,RAB11B,RAC1,DCTN1,RAB4A,ENTPD7,ENTPD8,MYO1B,MYO10,ARF1,MYO9B
GO:0017111	nucleoside-triphosphatase activity	18	778	0.86	9.13e-10	9606.ENSP00000226207,9606.ENSP00000229264,9606.ENSP00000260746,9606.ENSP00000262958,9606.ENSP00000264710,9606.ENSP00000264712,9606.ENSP00000294117,9606.ENSP00000300935,9606.ENSP00000333547,9606.ENSP00000348461,9606.ENSP00000354791,9606.ENSP00000355651,9606.ENSP00000359520,9606.ENSP00000360561,9606.ENSP00000376132,9606.ENSP00000421280,9606.ENSP00000440005,9606.ENSP00000471457	MYH1,GNB3,ARL3,GNA15,RAB10,KIF3C,GNG3,RAB8A,RAB11B,RAC1,DCTN1,RAB4A,ENTPD7,ENTPD8,MYO1B,MYO10,ARF1,MYO9B
GO:0003924	GTPase activity	10	283	1.04	7.35e-07	9606.ENSP00000229264,9606.ENSP00000260746,9606.ENSP00000262958,9606.ENSP00000264710,9606.ENSP00000294117,9606.ENSP00000300935,9606.ENSP00000333547,9606.ENSP00000348461,9606.ENSP00000355651,9606.ENSP00000440005	GNB3,ARL3,GNA15,RAB10,GNG3,RAB8A,RAB11B,RAC1,RAB4A,ARF1
GO:0008092	cytoskeletal protein binding	15	882	0.72	2.48e-06	9606.ENSP00000226207,9606.ENSP00000229264,9606.ENSP00000260746,9606.ENSP00000264710,9606.ENSP00000264712,9606.ENSP00000300935,9606.ENSP00000333547,9606.ENSP00000344666,9606.ENSP00000354791,9606.ENSP00000362751,9606.ENSP00000376132,9606.ENSP00000386229,9606.ENSP00000394496,9606.ENSP00000421280,9606.ENSP00000471457	MYH1,GNB3,ARL3,RAB10,KIF3C,RAB8A,RAB11B,NF2,DCTN1,RABGAP1,MYO1B,RGS14,CORO1C,MYO10,MYO9B
GO:0008017	microtubule binding	8	253	0.99	3.71e-05	9606.ENSP00000226207,9606.ENSP00000260746,9606.ENSP00000264712,9606.ENSP00000354791,9606.ENSP00000376132,9606.ENSP00000386229,9606.ENSP00000421280,9606.ENSP00000471457	MYH1,ARL3,KIF3C,DCTN1,MYO1B,RGS14,MYO10,MYO9B
GO:0015631	tubulin binding	9	344	0.91	3.71e-05	9606.ENSP00000226207,9606.ENSP00000260746,9606.ENSP00000264712,9606.ENSP00000354791,9606.ENSP00000362751,9606.ENSP00000376132,9606.ENSP00000386229,9606.ENSP00000421280,9606.ENSP00000471457	MYH1,ARL3,KIF3C,DCTN1,RABGAP1,MYO1B,RGS14,MYO10,MYO9B
GO:0019003	GDP binding	5	59	1.42	3.71e-05	9606.ENSP00000260746,9606.ENSP00000264710,9606.ENSP00000300935,9606.ENSP00000333547,9606.ENSP00000355651	ARL3,RAB10,RAB8A,RAB11B,RAB4A
GO:0004950	chemokine receptor activity	4	27	1.66	4.79e-05	9606.ENSP00000292174,9606.ENSP00000296140,9606.ENSP00000349967,9606.ENSP00000442982	CXCR5,CCR1,CCRL2,GPR17
GO:0003774	motor activity	6	131	1.15	7.22e-05	9606.ENSP00000226207,9606.ENSP00000264712,9606.ENSP00000354791,9606.ENSP00000376132,9606.ENSP00000421280,9606.ENSP00000471457	MYH1,KIF3C,DCTN1,MYO1B,MYO10,MYO9B
GO:0005515	protein binding	39	6607	0.26	7.22e-05	9606.ENSP00000218316,9606.ENSP00000221543,9606.ENSP00000226207,9606.ENSP00000229264,9606.ENSP00000254976,9606.ENSP00000260746,9606.ENSP00000262305,9606.ENSP00000262958,9606.ENSP00000264710,9606.ENSP00000264712,9606.ENSP00000265572,9606.ENSP00000294117,9606.ENSP00000296140,9606.ENSP00000300935,9606.ENSP00000314214,9606.ENSP00000320038,9606.ENSP00000333547,9606.ENSP00000340944,9606.ENSP00000344220,…	GPR50,TBC1D17,MYH1,GNB3,SNAP25,ARL3,RAB11FIP3,GNA15,RAB10,KIF3C,OPRK1,GNG3,CCR1,RAB8A,VAMP2,ARHGAP33,RAB11B,PTPN11,PDPK1,NF2,RAC1,CCRL2,MTOR,DCTN1,RGS7,RAB4A,RABGAP1,MYO1B,GCGR,ADRA2C,RGS14,CORO1C,MYO10,FZD3,ARF1,GPR17,AKT1,MYO9B,TBC1D2
GO:0016787	hydrolase activity	21	2448	0.43	0.00021	9606.ENSP00000226207,9606.ENSP00000229264,9606.ENSP00000258662,9606.ENSP00000260746,9606.ENSP00000262958,9606.ENSP00000264710,9606.ENSP00000264712,9606.ENSP00000294117,9606.ENSP00000296140,9606.ENSP00000300935,9606.ENSP00000333547,9606.ENSP00000340944,9606.ENSP00000348461,9606.ENSP00000354791,9606.ENSP00000355651,9606.ENSP00000359520,9606.ENSP00000360561,9606.ENSP00000376132,9606.ENSP00000421280,…	MYH1,GNB3,NUDT15,ARL3,GNA15,RAB10,KIF3C,GNG3,CCR1,RAB8A,RAB11B,PTPN11,RAC1,DCTN1,RAB4A,ENTPD7,ENTPD8,MYO1B,MYO10,ARF1,MYO9B
GO:0060589	nucleoside-triphosphatase regulator activity	8	345	0.86	0.00021	9606.ENSP00000221543,9606.ENSP00000320038,9606.ENSP00000355523,9606.ENSP00000355651,9606.ENSP00000362751,9606.ENSP00000386229,9606.ENSP00000471457,9606.ENSP00000481721	TBC1D17,ARHGAP33,RGS7,RAB4A,RABGAP1,RGS14,MYO9B,TBC1D2
GO:0005525	GTP binding	8	366	0.83	0.00031	9606.ENSP00000260746,9606.ENSP00000262958,9606.ENSP00000264710,9606.ENSP00000300935,9606.ENSP00000333547,9606.ENSP00000348461,9606.ENSP00000355651,9606.ENSP00000440005	ARL3,GNA15,RAB10,RAB8A,RAB11B,RAC1,RAB4A,ARF1
GO:0017137	Rab GTPase binding	6	176	1.02	0.00031	9606.ENSP00000221543,9606.ENSP00000262305,9606.ENSP00000300935,9606.ENSP00000348461,9606.ENSP00000362751,9606.ENSP00000481721	TBC1D17,RAB11FIP3,RAB8A,RAC1,RABGAP1,TBC1D2
GO:0051020	GTPase binding	10	614	0.7	0.00031	9606.ENSP00000221543,9606.ENSP00000229264,9606.ENSP00000262305,9606.ENSP00000300935,9606.ENSP00000348461,9606.ENSP00000362751,9606.ENSP00000383558,9606.ENSP00000394496,9606.ENSP00000471457,9606.ENSP00000481721	TBC1D17,GNB3,RAB11FIP3,RAB8A,RAC1,RABGAP1,GCGR,CORO1C,MYO9B,TBC1D2
GO:0003777	microtubule motor activity	5	110	1.15	0.00032	9606.ENSP00000226207,9606.ENSP00000264712,9606.ENSP00000376132,9606.ENSP00000421280,9606.ENSP00000471457	MYH1,KIF3C,MYO1B,MYO10,MYO9B
GO:0005096	GTPase activator activity	7	278	0.89	0.00032	9606.ENSP00000221543,9606.ENSP00000320038,9606.ENSP00000355523,9606.ENSP00000362751,9606.ENSP00000386229,9606.ENSP00000471457,9606.ENSP00000481721	TBC1D17,ARHGAP33,RGS7,RABGAP1,RGS14,MYO9B,TBC1D2
GO:0008047	enzyme activator activity	9	510	0.74	0.00032	9606.ENSP00000221543,9606.ENSP00000320038,9606.ENSP00000344220,9606.ENSP00000355523,9606.ENSP00000355651,9606.ENSP00000362751,9606.ENSP00000386229,9606.ENSP00000471457,9606.ENSP00000481721	TBC1D17,ARHGAP33,PDPK1,RGS7,RAB4A,RABGAP1,RGS14,MYO9B,TBC1D2
GO:0031489	myosin V binding	3	17	1.74	0.00032	9606.ENSP00000264710,9606.ENSP00000300935,9606.ENSP00000333547	RAB10,RAB8A,RAB11B
GO:0035639	purine ribonucleoside triphosphate binding	17	1794	0.47	0.00032	9606.ENSP00000226207,9606.ENSP00000260746,9606.ENSP00000262958,9606.ENSP00000264710,9606.ENSP00000264712,9606.ENSP00000300935,9606.ENSP00000333547,9606.ENSP00000344220,9606.ENSP00000348461,9606.ENSP00000354558,9606.ENSP00000355651,9606.ENSP00000360561,9606.ENSP00000376132,9606.ENSP00000421280,9606.ENSP00000440005,9606.ENSP00000451828,9606.ENSP00000471457	MYH1,ARL3,GNA15,RAB10,KIF3C,RAB8A,RAB11B,PDPK1,RAC1,MTOR,RAB4A,ENTPD8,MYO1B,MYO10,ARF1,AKT1,MYO9B
GO:0000146	microfilament motor activity	3	21	1.65	0.00044	9606.ENSP00000376132,9606.ENSP00000421280,9606.ENSP00000471457	MYO1B,MYO10,MYO9B
GO:0032555	purine ribonucleotide binding	17	1853	0.45	0.00044	9606.ENSP00000226207,9606.ENSP00000260746,9606.ENSP00000262958,9606.ENSP00000264710,9606.ENSP00000264712,9606.ENSP00000300935,9606.ENSP00000333547,9606.ENSP00000344220,9606.ENSP00000348461,9606.ENSP00000354558,9606.ENSP00000355651,9606.ENSP00000360561,9606.ENSP00000376132,9606.ENSP00000421280,9606.ENSP00000440005,9606.ENSP00000451828,9606.ENSP00000471457	MYH1,ARL3,GNA15,RAB10,KIF3C,RAB8A,RAB11B,PDPK1,RAC1,MTOR,RAB4A,ENTPD8,MYO1B,MYO10,ARF1,AKT1,MYO9B
GO:0019901	protein kinase binding	9	599	0.67	0.00087	9606.ENSP00000300935,9606.ENSP00000320038,9606.ENSP00000340944,9606.ENSP00000344220,9606.ENSP00000348461,9606.ENSP00000354558,9606.ENSP00000354791,9606.ENSP00000386229,9606.ENSP00000451828	RAB8A,ARHGAP33,PTPN11,PDPK1,RAC1,MTOR,DCTN1,RGS14,AKT1
GO:0019899	enzyme binding	18	2197	0.41	0.00092	9606.ENSP00000221543,9606.ENSP00000229264,9606.ENSP00000262305,9606.ENSP00000300935,9606.ENSP00000320038,9606.ENSP00000340944,9606.ENSP00000344220,9606.ENSP00000348461,9606.ENSP00000354558,9606.ENSP00000354791,9606.ENSP00000355651,9606.ENSP00000362751,9606.ENSP00000383558,9606.ENSP00000386229,9606.ENSP00000394496,9606.ENSP00000451828,9606.ENSP00000471457,9606.ENSP00000481721	TBC1D17,GNB3,RAB11FIP3,RAB8A,ARHGAP33,PTPN11,PDPK1,RAC1,MTOR,DCTN1,RAB4A,RABGAP1,GCGR,RGS14,CORO1C,AKT1,MYO9B,TBC1D2
GO:0043168	anion binding	20	2696	0.36	0.0013	9606.ENSP00000226207,9606.ENSP00000260746,9606.ENSP00000262958,9606.ENSP00000264710,9606.ENSP00000264712,9606.ENSP00000300935,9606.ENSP00000314214,9606.ENSP00000320038,9606.ENSP00000320291,9606.ENSP00000333547,9606.ENSP00000344220,9606.ENSP00000348461,9606.ENSP00000354558,9606.ENSP00000355651,9606.ENSP00000360561,9606.ENSP00000376132,9606.ENSP00000421280,9606.ENSP00000440005,9606.ENSP00000451828,…	MYH1,ARL3,GNA15,RAB10,KIF3C,RAB8A,VAMP2,ARHGAP33,OSBPL1A,RAB11B,PDPK1,RAC1,MTOR,RAB4A,ENTPD8,MYO1B,MYO10,ARF1,AKT1,MYO9B
GO:0017016	Ras GTPase binding	8	510	0.69	0.0015	9606.ENSP00000221543,9606.ENSP00000262305,9606.ENSP00000300935,9606.ENSP00000348461,9606.ENSP00000362751,9606.ENSP00000394496,9606.ENSP00000471457,9606.ENSP00000481721	TBC1D17,RAB11FIP3,RAB8A,RAC1,RABGAP1,CORO1C,MYO9B,TBC1D2
GO:0005547	phosphatidylinositol-3,4,5-trisphosphate binding	3	37	1.4	0.0016	9606.ENSP00000376132,9606.ENSP00000421280,9606.ENSP00000451828	MYO1B,MYO10,AKT1
GO:0005516	calmodulin binding	5	194	0.9	0.0023	9606.ENSP00000226207,9606.ENSP00000314214,9606.ENSP00000376132,9606.ENSP00000421280,9606.ENSP00000471457	MYH1,VAMP2,MYO1B,MYO10,MYO9B
GO:0008188	neuropeptide receptor activity	3	47	1.3	0.0028	9606.ENSP00000239032,9606.ENSP00000303325,9606.ENSP00000332591	PRLHR,TACR3,NPY2R
GO:0036094	small molecule binding	18	2460	0.36	0.0029	9606.ENSP00000226207,9606.ENSP00000260746,9606.ENSP00000262958,9606.ENSP00000264710,9606.ENSP00000264712,9606.ENSP00000300935,9606.ENSP00000320291,9606.ENSP00000333547,9606.ENSP00000344220,9606.ENSP00000348461,9606.ENSP00000354558,9606.ENSP00000355651,9606.ENSP00000360561,9606.ENSP00000376132,9606.ENSP00000421280,9606.ENSP00000440005,9606.ENSP00000451828,9606.ENSP00000471457	MYH1,ARL3,GNA15,RAB10,KIF3C,RAB8A,OSBPL1A,RAB11B,PDPK1,RAC1,MTOR,RAB4A,ENTPD8,MYO1B,MYO10,ARF1,AKT1,MYO9B
GO:0004983	neuropeptide Y receptor activity	2	10	1.79	0.0032	9606.ENSP00000239032,9606.ENSP00000332591	PRLHR,NPY2R
GO:0030898	actin-dependent ATPase activity	2	11	1.75	0.0037	9606.ENSP00000376132,9606.ENSP00000421280	MYO1B,MYO10
GO:0017110	nucleoside-diphosphatase activity	2	14	1.65	0.0056	9606.ENSP00000258662,9606.ENSP00000360561	NUDT15,ENTPD8
GO:0032794	GTPase activating protein binding	2	14	1.65	0.0056	9606.ENSP00000386229,9606.ENSP00000451828	RGS14,AKT1
GO:0016500	protein-hormone receptor activity	2	15	1.62	0.006	9606.ENSP00000294954,9606.ENSP00000331600	LHCGR,GPR173
GO:0005543	phospholipid binding	6	382	0.69	0.0066	9606.ENSP00000314214,9606.ENSP00000320038,9606.ENSP00000320291,9606.ENSP00000376132,9606.ENSP00000421280,9606.ENSP00000451828	VAMP2,ARHGAP33,OSBPL1A,MYO1B,MYO10,AKT1
GO:0030234	enzyme regulator activity	10	1016	0.49	0.0066	9606.ENSP00000221543,9606.ENSP00000320038,9606.ENSP00000344220,9606.ENSP00000355523,9606.ENSP00000355651,9606.ENSP00000362751,9606.ENSP00000386229,9606.ENSP00000451828,9606.ENSP00000471457,9606.ENSP00000481721	TBC1D17,ARHGAP33,PDPK1,RGS7,RAB4A,RABGAP1,RGS14,AKT1,MYO9B,TBC1D2
GO:0043274	phospholipase binding	2	16	1.59	0.0066	9606.ENSP00000340944,9606.ENSP00000344220	PTPN11,PDPK1
GO:0051015	actin filament binding	4	158	0.9	0.0077	9606.ENSP00000226207,9606.ENSP00000376132,9606.ENSP00000394496,9606.ENSP00000421280	MYH1,MYO1B,CORO1C,MYO10
GO:0001664	G protein-coupled receptor binding	5	272	0.76	0.0081	9606.ENSP00000262958,9606.ENSP00000294117,9606.ENSP00000340944,9606.ENSP00000349967,9606.ENSP00000386069	GNA15,GNG3,PTPN11,CCRL2,ADRA2C
GO:0033612	receptor serine/threonine kinase binding	2	19	1.51	0.0084	9606.ENSP00000265572,9606.ENSP00000442982	OPRK1,GPR17
GO:0003779	actin binding	6	413	0.65	0.009	9606.ENSP00000226207,9606.ENSP00000344666,9606.ENSP00000376132,9606.ENSP00000394496,9606.ENSP00000421280,9606.ENSP00000471457	MYH1,NF2,MYO1B,CORO1C,MYO10,MYO9B
GO:0017075	syntaxin-1 binding	2	20	1.49	0.009	9606.ENSP00000254976,9606.ENSP00000314214	SNAP25,VAMP2
GO:0019905	syntaxin binding	3	83	1.05	0.0104	9606.ENSP00000254976,9606.ENSP00000314214,9606.ENSP00000355651	SNAP25,VAMP2,RAB4A
GO:0005158	insulin receptor binding	2	23	1.43	0.0112	9606.ENSP00000340944,9606.ENSP00000344220	PTPN11,PDPK1
GO:0005488	binding	49	11878	0.11	0.0122	9606.ENSP00000218316,9606.ENSP00000221543,9606.ENSP00000226207,9606.ENSP00000229264,9606.ENSP00000254976,9606.ENSP00000258662,9606.ENSP00000260746,9606.ENSP00000262305,9606.ENSP00000262958,9606.ENSP00000264710,9606.ENSP00000264712,9606.ENSP00000265572,9606.ENSP00000276198,9606.ENSP00000294117,9606.ENSP00000294954,9606.ENSP00000296140,9606.ENSP00000300935,9606.ENSP00000314214,9606.ENSP00000320038,…	GPR50,TBC1D17,MYH1,GNB3,SNAP25,NUDT15,ARL3,RAB11FIP3,GNA15,RAB10,KIF3C,OPRK1,HTR2C,GNG3,LHCGR,CCR1,RAB8A,VAMP2,ARHGAP33,OSBPL1A,GPR39,OR5P3,RAB11B,PTPN11,PDPK1,NF2,RAC1,CCRL2,MTOR,DCTN1,RGS7,RAB4A,CNR1,ENTPD7,ENTPD8,RABGAP1,MYO1B,GCGR,ADRA2C,RGS14,CALCRL,CORO1C,MYO10,FZD3,ARF1,GPR17,AKT1,MYO9B,TBC1D2
GO:0042562	hormone binding	3	90	1.02	0.0125	9606.ENSP00000294954,9606.ENSP00000383558,9606.ENSP00000386972	LHCGR,GCGR,CALCRL
GO:0030507	spectrin binding	2	26	1.38	0.0134	9606.ENSP00000229264,9606.ENSP00000421280	GNB3,MYO10
GO:0044877	protein-containing complex binding	9	968	0.46	0.0139	9606.ENSP00000226207,9606.ENSP00000262958,9606.ENSP00000340944,9606.ENSP00000344220,9606.ENSP00000354558,9606.ENSP00000354791,9606.ENSP00000376132,9606.ENSP00000394496,9606.ENSP00000421280	MYH1,GNA15,PTPN11,PDPK1,MTOR,DCTN1,MYO1B,CORO1C,MYO10
GO:0035091	phosphatidylinositol binding	4	220	0.75	0.0209	9606.ENSP00000320038,9606.ENSP00000376132,9606.ENSP00000421280,9606.ENSP00000451828	ARHGAP33,MYO1B,MYO10,AKT1
GO:0005484	SNAP receptor activity	2	38	1.21	0.0256	9606.ENSP00000254976,9606.ENSP00000314214	SNAP25,VAMP2
GO:0017046	peptide hormone binding	2	43	1.16	0.0318	9606.ENSP00000383558,9606.ENSP00000386972	GCGR,CALCRL
GO:0008227	G protein-coupled amine receptor activity	2	48	1.11	0.038	9606.ENSP00000276198,9606.ENSP00000386069	HTR2C,ADRA2C
GO:0098772	molecular function regulator	12	1793	0.32	0.038	9606.ENSP00000221543,9606.ENSP00000320038,9606.ENSP00000332591,9606.ENSP00000344220,9606.ENSP00000355523,9606.ENSP00000355651,9606.ENSP00000362751,9606.ENSP00000383558,9606.ENSP00000386229,9606.ENSP00000451828,9606.ENSP00000471457,9606.ENSP00000481721	TBC1D17,ARHGAP33,NPY2R,PDPK1,RGS7,RAB4A,RABGAP1,GCGR,RGS14,AKT1,MYO9B,TBC1D2

## Sheet: SV2 (+) Cellular Component
#term ID	term description	observed gene count	background gene count	strength	false discovery rate	matching proteins in your network (IDs)	matching proteins in your network (labels)
GO:0071944	cell periphery	50	5254	0.47	1.75e-15	9606.ENSP00000218316,9606.ENSP00000229264,9606.ENSP00000239032,9606.ENSP00000254976,9606.ENSP00000262305,9606.ENSP00000262958,9606.ENSP00000264710,9606.ENSP00000265572,9606.ENSP00000276198,9606.ENSP00000283296,9606.ENSP00000284674,9606.ENSP00000292174,9606.ENSP00000294117,9606.ENSP00000294954,9606.ENSP00000296140,9606.ENSP00000300098,9606.ENSP00000300935,9606.ENSP00000303325,9606.ENSP00000304419,…	GPR50,GNB3,PRLHR,SNAP25,RAB11FIP3,GNA15,RAB10,OPRK1,HTR2C,GPR116,GPR26,CXCR5,GNG3,LHCGR,CCR1,GPR182,RAB8A,TACR3,OR2B2,OR3A1,VAMP2,ARHGAP33,GPR39,GPR173,OR5P3,NPY2R,PDPK1,NF2,RAC1,CCRL2,DCTN1,RGS7,RAB4A,CNR1,ENTPD8,OR1A2,MYO1B,GCGR,ADRA2C,RGS14,CALCRL,GPR141,CORO1C,MYO10,TRHR,FZD3,ARF1,GPR17,AKT1,MYO9B
GO:0005886	plasma membrane	48	5159	0.46	3.51e-14	9606.ENSP00000218316,9606.ENSP00000229264,9606.ENSP00000239032,9606.ENSP00000254976,9606.ENSP00000262305,9606.ENSP00000262958,9606.ENSP00000264710,9606.ENSP00000265572,9606.ENSP00000276198,9606.ENSP00000283296,9606.ENSP00000284674,9606.ENSP00000292174,9606.ENSP00000294117,9606.ENSP00000294954,9606.ENSP00000296140,9606.ENSP00000300098,9606.ENSP00000300935,9606.ENSP00000303325,9606.ENSP00000304419,…	GPR50,GNB3,PRLHR,SNAP25,RAB11FIP3,GNA15,RAB10,OPRK1,HTR2C,GPR116,GPR26,CXCR5,GNG3,LHCGR,CCR1,GPR182,RAB8A,TACR3,OR2B2,OR3A1,VAMP2,ARHGAP33,GPR39,GPR173,OR5P3,NPY2R,PDPK1,NF2,RAC1,CCRL2,RGS7,RAB4A,CNR1,ENTPD8,OR1A2,MYO1B,GCGR,ADRA2C,RGS14,CALCRL,GPR141,CORO1C,MYO10,TRHR,FZD3,ARF1,GPR17,AKT1
GO:0016020	membrane	53	8420	0.29	2.03e-09	9606.ENSP00000218316,9606.ENSP00000229264,9606.ENSP00000239032,9606.ENSP00000254976,9606.ENSP00000260746,9606.ENSP00000262305,9606.ENSP00000262958,9606.ENSP00000264710,9606.ENSP00000265572,9606.ENSP00000276198,9606.ENSP00000283296,9606.ENSP00000284674,9606.ENSP00000292174,9606.ENSP00000294117,9606.ENSP00000294954,9606.ENSP00000296140,9606.ENSP00000300098,9606.ENSP00000300935,9606.ENSP00000303325,…	GPR50,GNB3,PRLHR,SNAP25,ARL3,RAB11FIP3,GNA15,RAB10,OPRK1,HTR2C,GPR116,GPR26,CXCR5,GNG3,LHCGR,CCR1,GPR182,RAB8A,TACR3,OR2B2,OR3A1,VAMP2,ARHGAP33,GPR39,GPR173,OR5P3,NPY2R,RAB11B,PDPK1,NF2,RAC1,CCRL2,MTOR,RGS7,RAB4A,CNR1,TMED5,ENTPD7,ENTPD8,OR1A2,MYO1B,GCGR,ADRA2C,RGS14,CALCRL,GPR141,CORO1C,MYO10,TRHR,FZD3,ARF1,GPR17,AKT1
GO:0042995	cell projection	26	1969	0.61	7.47e-09	9606.ENSP00000229264,9606.ENSP00000254976,9606.ENSP00000260746,9606.ENSP00000264710,9606.ENSP00000264712,9606.ENSP00000265572,9606.ENSP00000294117,9606.ENSP00000300935,9606.ENSP00000303325,9606.ENSP00000314214,9606.ENSP00000320038,9606.ENSP00000332591,9606.ENSP00000344220,9606.ENSP00000344666,9606.ENSP00000348461,9606.ENSP00000354558,9606.ENSP00000354791,9606.ENSP00000358513,9606.ENSP00000376132,…	GNB3,SNAP25,ARL3,RAB10,KIF3C,OPRK1,GNG3,RAB8A,TACR3,VAMP2,ARHGAP33,NPY2R,PDPK1,NF2,RAC1,MTOR,DCTN1,CNR1,MYO1B,ADRA2C,RGS14,CORO1C,MYO10,FZD3,ARF1,AKT1
GO:0120025	plasma membrane bounded cell projection	25	1900	0.61	1.74e-08	9606.ENSP00000229264,9606.ENSP00000254976,9606.ENSP00000260746,9606.ENSP00000264710,9606.ENSP00000264712,9606.ENSP00000265572,9606.ENSP00000294117,9606.ENSP00000300935,9606.ENSP00000303325,9606.ENSP00000314214,9606.ENSP00000320038,9606.ENSP00000332591,9606.ENSP00000344666,9606.ENSP00000348461,9606.ENSP00000354558,9606.ENSP00000354791,9606.ENSP00000358513,9606.ENSP00000376132,9606.ENSP00000386069,…	GNB3,SNAP25,ARL3,RAB10,KIF3C,OPRK1,GNG3,RAB8A,TACR3,VAMP2,ARHGAP33,NPY2R,NF2,RAC1,MTOR,DCTN1,CNR1,MYO1B,ADRA2C,RGS14,CORO1C,MYO10,FZD3,ARF1,AKT1
GO:0043005	neuron projection	19	1142	0.71	9.23e-08	9606.ENSP00000229264,9606.ENSP00000254976,9606.ENSP00000260746,9606.ENSP00000265572,9606.ENSP00000294117,9606.ENSP00000300935,9606.ENSP00000303325,9606.ENSP00000314214,9606.ENSP00000320038,9606.ENSP00000344666,9606.ENSP00000348461,9606.ENSP00000354558,9606.ENSP00000354791,9606.ENSP00000358513,9606.ENSP00000386069,9606.ENSP00000386229,9606.ENSP00000421280,9606.ENSP00000437489,9606.ENSP00000440005	GNB3,SNAP25,ARL3,OPRK1,GNG3,RAB8A,TACR3,VAMP2,ARHGAP33,NF2,RAC1,MTOR,DCTN1,CNR1,ADRA2C,RGS14,MYO10,FZD3,ARF1
GO:0045202	synapse	16	849	0.77	3.59e-07	9606.ENSP00000254976,9606.ENSP00000265572,9606.ENSP00000294117,9606.ENSP00000300935,9606.ENSP00000314214,9606.ENSP00000320038,9606.ENSP00000333547,9606.ENSP00000344220,9606.ENSP00000348461,9606.ENSP00000355651,9606.ENSP00000358513,9606.ENSP00000386069,9606.ENSP00000386229,9606.ENSP00000437489,9606.ENSP00000440005,9606.ENSP00000451828	SNAP25,OPRK1,GNG3,RAB8A,VAMP2,ARHGAP33,RAB11B,PDPK1,RAC1,RAB4A,CNR1,ADRA2C,RGS14,FZD3,ARF1,AKT1
GO:0036477	somatodendritic compartment	14	731	0.77	2.58e-06	9606.ENSP00000229264,9606.ENSP00000254976,9606.ENSP00000265572,9606.ENSP00000294117,9606.ENSP00000300935,9606.ENSP00000303325,9606.ENSP00000320038,9606.ENSP00000344220,9606.ENSP00000348461,9606.ENSP00000354558,9606.ENSP00000354791,9606.ENSP00000386229,9606.ENSP00000421280,9606.ENSP00000437489	GNB3,SNAP25,OPRK1,GNG3,RAB8A,TACR3,ARHGAP33,PDPK1,RAC1,MTOR,DCTN1,RGS14,MYO10,FZD3
GO:0055038	recycling endosome membrane	6	74	1.4	6.46e-06	9606.ENSP00000262305,9606.ENSP00000264710,9606.ENSP00000300935,9606.ENSP00000333547,9606.ENSP00000348461,9606.ENSP00000355651	RAB11FIP3,RAB10,RAB8A,RAB11B,RAC1,RAB4A
GO:0005768	endosome	14	876	0.7	1.79e-05	9606.ENSP00000221543,9606.ENSP00000262305,9606.ENSP00000264710,9606.ENSP00000294954,9606.ENSP00000300935,9606.ENSP00000320291,9606.ENSP00000333547,9606.ENSP00000344666,9606.ENSP00000348461,9606.ENSP00000355651,9606.ENSP00000376132,9606.ENSP00000383558,9606.ENSP00000386069,9606.ENSP00000386972	TBC1D17,RAB11FIP3,RAB10,LHCGR,RAB8A,OSBPL1A,RAB11B,NF2,RAC1,RAB4A,MYO1B,GCGR,ADRA2C,CALCRL
GO:0044297	cell body	11	526	0.81	2.44e-05	9606.ENSP00000229264,9606.ENSP00000265572,9606.ENSP00000294117,9606.ENSP00000300935,9606.ENSP00000303325,9606.ENSP00000344220,9606.ENSP00000344666,9606.ENSP00000354558,9606.ENSP00000354791,9606.ENSP00000421280,9606.ENSP00000437489	GNB3,OPRK1,GNG3,RAB8A,TACR3,PDPK1,NF2,MTOR,DCTN1,MYO10,FZD3
GO:0055037	recycling endosome	7	164	1.12	2.8e-05	9606.ENSP00000221543,9606.ENSP00000262305,9606.ENSP00000264710,9606.ENSP00000300935,9606.ENSP00000333547,9606.ENSP00000348461,9606.ENSP00000355651	TBC1D17,RAB11FIP3,RAB10,RAB8A,RAB11B,RAC1,RAB4A
GO:0005887	integral component of plasma membrane	18	1564	0.55	2.96e-05	9606.ENSP00000218316,9606.ENSP00000239032,9606.ENSP00000265572,9606.ENSP00000276198,9606.ENSP00000292174,9606.ENSP00000294954,9606.ENSP00000296140,9606.ENSP00000303325,9606.ENSP00000314214,9606.ENSP00000327417,9606.ENSP00000332591,9606.ENSP00000349967,9606.ENSP00000358513,9606.ENSP00000383558,9606.ENSP00000386069,9606.ENSP00000386972,9606.ENSP00000430711,9606.ENSP00000442982	GPR50,PRLHR,OPRK1,HTR2C,CXCR5,LHCGR,CCR1,TACR3,VAMP2,GPR39,NPY2R,CCRL2,CNR1,GCGR,ADRA2C,CALCRL,TRHR,GPR17
GO:0098794	postsynapse	10	435	0.85	2.96e-05	9606.ENSP00000254976,9606.ENSP00000294117,9606.ENSP00000300935,9606.ENSP00000320038,9606.ENSP00000344220,9606.ENSP00000348461,9606.ENSP00000355651,9606.ENSP00000386229,9606.ENSP00000440005,9606.ENSP00000451828	SNAP25,GNG3,RAB8A,ARHGAP33,PDPK1,RAC1,RAB4A,RGS14,ARF1,AKT1
GO:0031982	vesicle	21	2318	0.45	0.00012	9606.ENSP00000221543,9606.ENSP00000254976,9606.ENSP00000262305,9606.ENSP00000264710,9606.ENSP00000283296,9606.ENSP00000294954,9606.ENSP00000300935,9606.ENSP00000314214,9606.ENSP00000320291,9606.ENSP00000333547,9606.ENSP00000344220,9606.ENSP00000344666,9606.ENSP00000348461,9606.ENSP00000355651,9606.ENSP00000359520,9606.ENSP00000376132,9606.ENSP00000383558,9606.ENSP00000386069,9606.ENSP00000386972,…	TBC1D17,SNAP25,RAB11FIP3,RAB10,GPR116,LHCGR,RAB8A,VAMP2,OSBPL1A,RAB11B,PDPK1,NF2,RAC1,RAB4A,ENTPD7,MYO1B,GCGR,ADRA2C,CALCRL,AKT1,TBC1D2
GO:0005623	cell	63	16271	0.08	0.00013	9606.ENSP00000218316,9606.ENSP00000221543,9606.ENSP00000226207,9606.ENSP00000229264,9606.ENSP00000239032,9606.ENSP00000254976,9606.ENSP00000258662,9606.ENSP00000260746,9606.ENSP00000262305,9606.ENSP00000262958,9606.ENSP00000264710,9606.ENSP00000264712,9606.ENSP00000265572,9606.ENSP00000276198,9606.ENSP00000283296,9606.ENSP00000284674,9606.ENSP00000292174,9606.ENSP00000294117,9606.ENSP00000294954,…	GPR50,TBC1D17,MYH1,GNB3,PRLHR,SNAP25,NUDT15,ARL3,RAB11FIP3,GNA15,RAB10,KIF3C,OPRK1,HTR2C,GPR116,GPR26,CXCR5,GNG3,LHCGR,CCR1,GPR182,RAB8A,TACR3,OR2B2,OR3A1,VAMP2,ARHGAP33,OSBPL1A,GPR39,GPR173,OR5P3,NPY2R,RAB11B,PTPN11,PDPK1,NF2,RAC1,CCRL2,MTOR,DCTN1,RGS7,RAB4A,CNR1,TMED5,ENTPD7,ENTPD8,RABGAP1,OR1A2,MYO1B,GCGR,ADRA2C,RGS14,CALCRL,GPR141,CORO1C,MYO10,TRHR,FZD3,ARF1,GPR17,AKT1,MYO9B,TBC1D2
GO:0030425	dendrite	10	531	0.77	0.00013	9606.ENSP00000229264,9606.ENSP00000265572,9606.ENSP00000294117,9606.ENSP00000300935,9606.ENSP00000303325,9606.ENSP00000320038,9606.ENSP00000348461,9606.ENSP00000354558,9606.ENSP00000386229,9606.ENSP00000437489	GNB3,OPRK1,GNG3,RAB8A,TACR3,ARHGAP33,RAC1,MTOR,RGS14,FZD3
GO:0031410	cytoplasmic vesicle	20	2226	0.45	0.00019	9606.ENSP00000221543,9606.ENSP00000254976,9606.ENSP00000262305,9606.ENSP00000264710,9606.ENSP00000283296,9606.ENSP00000294954,9606.ENSP00000300935,9606.ENSP00000314214,9606.ENSP00000320291,9606.ENSP00000333547,9606.ENSP00000344220,9606.ENSP00000344666,9606.ENSP00000348461,9606.ENSP00000355651,9606.ENSP00000359520,9606.ENSP00000376132,9606.ENSP00000383558,9606.ENSP00000386069,9606.ENSP00000386972,…	TBC1D17,SNAP25,RAB11FIP3,RAB10,GPR116,LHCGR,RAB8A,VAMP2,OSBPL1A,RAB11B,PDPK1,NF2,RAC1,RAB4A,ENTPD7,MYO1B,GCGR,ADRA2C,CALCRL,TBC1D2
GO:0098793	presynapse	8	354	0.85	0.00024	9606.ENSP00000254976,9606.ENSP00000265572,9606.ENSP00000300935,9606.ENSP00000314214,9606.ENSP00000333547,9606.ENSP00000358513,9606.ENSP00000386069,9606.ENSP00000437489	SNAP25,OPRK1,RAB8A,VAMP2,RAB11B,CNR1,ADRA2C,FZD3
GO:0031224	intrinsic component of membrane	32	5316	0.27	0.00071	9606.ENSP00000218316,9606.ENSP00000239032,9606.ENSP00000265572,9606.ENSP00000276198,9606.ENSP00000283296,9606.ENSP00000284674,9606.ENSP00000292174,9606.ENSP00000294954,9606.ENSP00000296140,9606.ENSP00000300098,9606.ENSP00000303325,9606.ENSP00000304419,9606.ENSP00000313803,9606.ENSP00000314214,9606.ENSP00000327417,9606.ENSP00000331600,9606.ENSP00000332068,9606.ENSP00000332591,9606.ENSP00000333547,…	GPR50,PRLHR,OPRK1,HTR2C,GPR116,GPR26,CXCR5,LHCGR,CCR1,GPR182,TACR3,OR2B2,OR3A1,VAMP2,GPR39,GPR173,OR5P3,NPY2R,RAB11B,CCRL2,CNR1,TMED5,ENTPD7,ENTPD8,OR1A2,GCGR,ADRA2C,CALCRL,GPR141,TRHR,FZD3,GPR17
GO:0015629	actin cytoskeleton	8	432	0.76	0.00089	9606.ENSP00000226207,9606.ENSP00000320038,9606.ENSP00000344666,9606.ENSP00000354791,9606.ENSP00000376132,9606.ENSP00000394496,9606.ENSP00000421280,9606.ENSP00000471457	MYH1,ARHGAP33,NF2,DCTN1,MYO1B,CORO1C,MYO10,MYO9B
GO:0016021	integral component of membrane	31	5155	0.27	0.00097	9606.ENSP00000218316,9606.ENSP00000239032,9606.ENSP00000265572,9606.ENSP00000276198,9606.ENSP00000283296,9606.ENSP00000284674,9606.ENSP00000292174,9606.ENSP00000294954,9606.ENSP00000296140,9606.ENSP00000300098,9606.ENSP00000303325,9606.ENSP00000304419,9606.ENSP00000313803,9606.ENSP00000314214,9606.ENSP00000327417,9606.ENSP00000331600,9606.ENSP00000332068,9606.ENSP00000332591,9606.ENSP00000349967,…	GPR50,PRLHR,OPRK1,HTR2C,GPR116,GPR26,CXCR5,LHCGR,CCR1,GPR182,TACR3,OR2B2,OR3A1,VAMP2,GPR39,GPR173,OR5P3,NPY2R,CCRL2,CNR1,TMED5,ENTPD7,ENTPD8,OR1A2,GCGR,ADRA2C,CALCRL,GPR141,TRHR,FZD3,GPR17
GO:0016459	myosin complex	4	69	1.26	0.00097	9606.ENSP00000226207,9606.ENSP00000376132,9606.ENSP00000421280,9606.ENSP00000471457	MYH1,MYO1B,MYO10,MYO9B
GO:0043025	neuronal cell body	8	460	0.73	0.0012	9606.ENSP00000265572,9606.ENSP00000300935,9606.ENSP00000303325,9606.ENSP00000344220,9606.ENSP00000354558,9606.ENSP00000354791,9606.ENSP00000421280,9606.ENSP00000437489	OPRK1,RAB8A,TACR3,PDPK1,MTOR,DCTN1,MYO10,FZD3
GO:0070032	synaptobrevin 2-SNAP-25-syntaxin-1a-complexin I complex	2	4	2.19	0.0015	9606.ENSP00000254976,9606.ENSP00000314214	SNAP25,VAMP2
GO:0031252	cell leading edge	7	371	0.77	0.0019	9606.ENSP00000303325,9606.ENSP00000344666,9606.ENSP00000348461,9606.ENSP00000354791,9606.ENSP00000394496,9606.ENSP00000421280,9606.ENSP00000440005	TACR3,NF2,RAC1,DCTN1,CORO1C,MYO10,ARF1
GO:0070382	exocytic vesicle	5	172	0.96	0.0024	9606.ENSP00000254976,9606.ENSP00000264710,9606.ENSP00000300935,9606.ENSP00000314214,9606.ENSP00000333547	SNAP25,RAB10,RAB8A,VAMP2,RAB11B
GO:0030175	filopodium	4	96	1.11	0.0026	9606.ENSP00000344666,9606.ENSP00000376132,9606.ENSP00000421280,9606.ENSP00000437489	NF2,MYO1B,MYO10,FZD3
GO:0032593	insulin-responsive compartment	2	7	1.95	0.0031	9606.ENSP00000264710,9606.ENSP00000355651	RAB10,RAB4A
GO:0005929	cilium	8	570	0.64	0.0041	9606.ENSP00000260746,9606.ENSP00000264710,9606.ENSP00000264712,9606.ENSP00000300935,9606.ENSP00000303325,9606.ENSP00000332591,9606.ENSP00000354791,9606.ENSP00000451828	ARL3,RAB10,KIF3C,RAB8A,TACR3,NPY2R,DCTN1,AKT1
GO:0005802	trans-Golgi network	5	205	0.88	0.0044	9606.ENSP00000254976,9606.ENSP00000264710,9606.ENSP00000300935,9606.ENSP00000314214,9606.ENSP00000348461	SNAP25,RAB10,RAB8A,VAMP2,RAC1
GO:0014069	postsynaptic density	5	205	0.88	0.0044	9606.ENSP00000294117,9606.ENSP00000300935,9606.ENSP00000344220,9606.ENSP00000386229,9606.ENSP00000440005	GNG3,RAB8A,PDPK1,RGS14,ARF1
GO:0098590	plasma membrane region	11	1061	0.51	0.0044	9606.ENSP00000254976,9606.ENSP00000262305,9606.ENSP00000303325,9606.ENSP00000344666,9606.ENSP00000348461,9606.ENSP00000358513,9606.ENSP00000386229,9606.ENSP00000394496,9606.ENSP00000421280,9606.ENSP00000437489,9606.ENSP00000440005	SNAP25,RAB11FIP3,TACR3,NF2,RAC1,CNR1,RGS14,CORO1C,MYO10,FZD3,ARF1
GO:0005856	cytoskeleton	16	2068	0.38	0.0048	9606.ENSP00000226207,9606.ENSP00000254976,9606.ENSP00000260746,9606.ENSP00000262305,9606.ENSP00000264712,9606.ENSP00000300935,9606.ENSP00000320038,9606.ENSP00000344666,9606.ENSP00000354791,9606.ENSP00000362751,9606.ENSP00000376132,9606.ENSP00000386229,9606.ENSP00000394496,9606.ENSP00000421280,9606.ENSP00000451828,9606.ENSP00000471457	MYH1,SNAP25,ARL3,RAB11FIP3,KIF3C,RAB8A,ARHGAP33,NF2,DCTN1,RABGAP1,MYO1B,RGS14,CORO1C,MYO10,AKT1,MYO9B
GO:0010008	endosome membrane	7	457	0.68	0.0048	9606.ENSP00000262305,9606.ENSP00000264710,9606.ENSP00000300935,9606.ENSP00000333547,9606.ENSP00000348461,9606.ENSP00000355651,9606.ENSP00000376132	RAB11FIP3,RAB10,RAB8A,RAB11B,RAC1,RAB4A,MYO1B
GO:0005938	cell cortex	5	230	0.83	0.0061	9606.ENSP00000320038,9606.ENSP00000344666,9606.ENSP00000354791,9606.ENSP00000421280,9606.ENSP00000471457	ARHGAP33,NF2,DCTN1,MYO10,MYO9B
GO:0098588	bounding membrane of organelle	15	1950	0.38	0.0072	9606.ENSP00000254976,9606.ENSP00000260746,9606.ENSP00000262305,9606.ENSP00000264710,9606.ENSP00000300935,9606.ENSP00000314214,9606.ENSP00000333547,9606.ENSP00000348461,9606.ENSP00000354558,9606.ENSP00000355651,9606.ENSP00000358513,9606.ENSP00000359305,9606.ENSP00000359520,9606.ENSP00000376132,9606.ENSP00000440005	SNAP25,ARL3,RAB11FIP3,RAB10,RAB8A,VAMP2,RAB11B,RAC1,MTOR,RAB4A,CNR1,TMED5,ENTPD7,MYO1B,ARF1
GO:0098805	whole membrane	13	1554	0.41	0.0076	9606.ENSP00000254976,9606.ENSP00000262305,9606.ENSP00000264710,9606.ENSP00000300935,9606.ENSP00000314214,9606.ENSP00000333547,9606.ENSP00000348461,9606.ENSP00000354558,9606.ENSP00000355651,9606.ENSP00000358513,9606.ENSP00000359520,9606.ENSP00000376132,9606.ENSP00000394496	SNAP25,RAB11FIP3,RAB10,RAB8A,VAMP2,RAB11B,RAC1,MTOR,RAB4A,CNR1,ENTPD7,MYO1B,CORO1C
GO:0043197	dendritic spine	4	143	0.94	0.0077	9606.ENSP00000300935,9606.ENSP00000320038,9606.ENSP00000348461,9606.ENSP00000386229	RAB8A,ARHGAP33,RAC1,RGS14
GO:0030666	endocytic vesicle membrane	4	152	0.91	0.0092	9606.ENSP00000264710,9606.ENSP00000300935,9606.ENSP00000333547,9606.ENSP00000359520	RAB10,RAB8A,RAB11B,ENTPD7
GO:0008021	synaptic vesicle	4	155	0.9	0.0095	9606.ENSP00000254976,9606.ENSP00000300935,9606.ENSP00000314214,9606.ENSP00000333547	SNAP25,RAB8A,VAMP2,RAB11B
GO:0030670	phagocytic vesicle membrane	3	71	1.12	0.0095	9606.ENSP00000264710,9606.ENSP00000300935,9606.ENSP00000333547	RAB10,RAB8A,RAB11B
GO:0031527	filopodium membrane	2	17	1.56	0.0095	9606.ENSP00000344666,9606.ENSP00000421280	NF2,MYO10
GO:0032433	filopodium tip	2	17	1.56	0.0095	9606.ENSP00000421280,9606.ENSP00000437489	MYO10,FZD3
GO:0005829	cytosol	27	4958	0.23	0.0097	9606.ENSP00000221543,9606.ENSP00000229264,9606.ENSP00000254976,9606.ENSP00000258662,9606.ENSP00000262305,9606.ENSP00000264710,9606.ENSP00000264712,9606.ENSP00000265572,9606.ENSP00000300935,9606.ENSP00000314214,9606.ENSP00000320038,9606.ENSP00000320291,9606.ENSP00000333547,9606.ENSP00000340944,9606.ENSP00000344220,9606.ENSP00000344666,9606.ENSP00000348461,9606.ENSP00000354558,9606.ENSP00000354791,…	TBC1D17,GNB3,SNAP25,NUDT15,RAB11FIP3,RAB10,KIF3C,OPRK1,RAB8A,VAMP2,ARHGAP33,OSBPL1A,RAB11B,PTPN11,PDPK1,NF2,RAC1,MTOR,DCTN1,RGS7,RAB4A,RABGAP1,MYO10,ARF1,AKT1,MYO9B,TBC1D2
GO:0030659	cytoplasmic vesicle membrane	8	724	0.54	0.0117	9606.ENSP00000254976,9606.ENSP00000264710,9606.ENSP00000300935,9606.ENSP00000314214,9606.ENSP00000333547,9606.ENSP00000348461,9606.ENSP00000355651,9606.ENSP00000359520	SNAP25,RAB10,RAB8A,VAMP2,RAB11B,RAC1,RAB4A,ENTPD7
GO:0030667	secretory granule membrane	5	298	0.72	0.0142	9606.ENSP00000254976,9606.ENSP00000264710,9606.ENSP00000300935,9606.ENSP00000314214,9606.ENSP00000348461	SNAP25,RAB10,RAB8A,VAMP2,RAC1
GO:0030027	lamellipodium	4	185	0.83	0.0155	9606.ENSP00000344666,9606.ENSP00000348461,9606.ENSP00000394496,9606.ENSP00000421280	NF2,RAC1,CORO1C,MYO10
GO:0005813	centrosome	6	468	0.6	0.0191	9606.ENSP00000260746,9606.ENSP00000262305,9606.ENSP00000300935,9606.ENSP00000354791,9606.ENSP00000362751,9606.ENSP00000386229	ARL3,RAB11FIP3,RAB8A,DCTN1,RABGAP1,RGS14
GO:0098791	Golgi subcompartment	8	801	0.49	0.0193	9606.ENSP00000254976,9606.ENSP00000260746,9606.ENSP00000264710,9606.ENSP00000300935,9606.ENSP00000314214,9606.ENSP00000348461,9606.ENSP00000354558,9606.ENSP00000440005	SNAP25,ARL3,RAB10,RAB8A,VAMP2,RAC1,MTOR,ARF1
GO:0005834	heterotrimeric G-protein complex	2	29	1.33	0.0201	9606.ENSP00000262958,9606.ENSP00000294117	GNA15,GNG3
GO:0030054	cell junction	9	1006	0.44	0.0214	9606.ENSP00000226207,9606.ENSP00000254976,9606.ENSP00000314214,9606.ENSP00000333547,9606.ENSP00000344220,9606.ENSP00000344666,9606.ENSP00000386229,9606.ENSP00000451828,9606.ENSP00000481721	MYH1,SNAP25,VAMP2,RAB11B,PDPK1,NF2,RGS14,AKT1,TBC1D2
GO:0031234	extrinsic component of cytoplasmic side of plasma membrane	3	106	0.94	0.0224	9606.ENSP00000254976,9606.ENSP00000262958,9606.ENSP00000294117	SNAP25,GNA15,GNG3
GO:0048471	perinuclear region of cytoplasm	7	670	0.51	0.0248	9606.ENSP00000254976,9606.ENSP00000314214,9606.ENSP00000344666,9606.ENSP00000355651,9606.ENSP00000376132,9606.ENSP00000440005,9606.ENSP00000471457	SNAP25,VAMP2,NF2,RAB4A,MYO1B,ARF1,MYO9B
GO:0005815	microtubule organizing center	7	683	0.5	0.0266	9606.ENSP00000260746,9606.ENSP00000262305,9606.ENSP00000300935,9606.ENSP00000354791,9606.ENSP00000362751,9606.ENSP00000386229,9606.ENSP00000451828	ARL3,RAB11FIP3,RAB8A,DCTN1,RABGAP1,RGS14,AKT1
GO:0044306	neuron projection terminus	3	115	0.91	0.0266	9606.ENSP00000265572,9606.ENSP00000314214,9606.ENSP00000386069	OPRK1,VAMP2,ADRA2C
GO:0012505	endomembrane system	23	4347	0.22	0.0284	9606.ENSP00000221543,9606.ENSP00000254976,9606.ENSP00000260746,9606.ENSP00000262305,9606.ENSP00000264710,9606.ENSP00000294954,9606.ENSP00000300935,9606.ENSP00000314214,9606.ENSP00000320291,9606.ENSP00000333547,9606.ENSP00000344666,9606.ENSP00000348461,9606.ENSP00000354558,9606.ENSP00000354791,9606.ENSP00000355651,9606.ENSP00000359305,9606.ENSP00000362751,9606.ENSP00000376132,9606.ENSP00000383558,…	TBC1D17,SNAP25,ARL3,RAB11FIP3,RAB10,LHCGR,RAB8A,VAMP2,OSBPL1A,RAB11B,NF2,RAC1,MTOR,DCTN1,RAB4A,TMED5,RABGAP1,MYO1B,GCGR,ADRA2C,CALCRL,ARF1,TBC1D2
GO:0097730	non-motile cilium	3	128	0.86	0.0335	9606.ENSP00000260746,9606.ENSP00000300935,9606.ENSP00000332591	ARL3,RAB8A,NPY2R
GO:0150034	distal axon	4	250	0.7	0.0344	9606.ENSP00000254976,9606.ENSP00000265572,9606.ENSP00000358513,9606.ENSP00000386069	SNAP25,OPRK1,CNR1,ADRA2C
GO:0099568	cytoplasmic region	5	402	0.59	0.0371	9606.ENSP00000320038,9606.ENSP00000344666,9606.ENSP00000354791,9606.ENSP00000421280,9606.ENSP00000471457	ARHGAP33,NF2,DCTN1,MYO10,MYO9B
GO:0005875	microtubule associated complex	3	144	0.81	0.0433	9606.ENSP00000264712,9606.ENSP00000354791,9606.ENSP00000362751	KIF3C,DCTN1,RABGAP1
GO:0031256	leading edge membrane	3	150	0.79	0.046	9606.ENSP00000303325,9606.ENSP00000344666,9606.ENSP00000348461	TACR3,NF2,RAC1
GO:0032154	cleavage furrow	2	52	1.08	0.046	9606.ENSP00000262305,9606.ENSP00000344666	RAB11FIP3,NF2
GO:0098552	side of membrane	5	436	0.55	0.0466	9606.ENSP00000254976,9606.ENSP00000262958,9606.ENSP00000292174,9606.ENSP00000294117,9606.ENSP00000296140	SNAP25,GNA15,CXCR5,GNG3,CCR1
GO:0016328	lateral plasma membrane	2	55	1.05	0.0491	9606.ENSP00000394496,9606.ENSP00000437489	CORO1C,FZD3

## Sheet: SV2 (+) KEGG pathways
#term ID	term description	observed gene count	background gene count	strength	false discovery rate	matching proteins in your network (IDs)	matching proteins in your network (labels)
hsa04080	Neuroactive ligand-receptor interaction	12	272	1.14	1.29e-08	9606.ENSP00000218316,9606.ENSP00000239032,9606.ENSP00000265572,9606.ENSP00000276198,9606.ENSP00000294954,9606.ENSP00000303325,9606.ENSP00000332591,9606.ENSP00000358513,9606.ENSP00000383558,9606.ENSP00000386069,9606.ENSP00000386972,9606.ENSP00000430711	GPR50,PRLHR,OPRK1,HTR2C,LHCGR,TACR3,NPY2R,CNR1,GCGR,ADRA2C,CALCRL,TRHR
hsa04152	AMPK signaling pathway	6	120	1.19	0.00022	9606.ENSP00000264710,9606.ENSP00000300935,9606.ENSP00000333547,9606.ENSP00000344220,9606.ENSP00000354558,9606.ENSP00000451828	RAB10,RAB8A,RAB11B,PDPK1,MTOR,AKT1
hsa04062	Chemokine signaling pathway	6	181	1.01	0.0014	9606.ENSP00000229264,9606.ENSP00000292174,9606.ENSP00000294117,9606.ENSP00000296140,9606.ENSP00000348461,9606.ENSP00000451828	GNB3,CXCR5,GNG3,CCR1,RAC1,AKT1
hsa05167	Kaposi's sarcoma-associated herpesvirus infection	6	183	1.01	0.0014	9606.ENSP00000229264,9606.ENSP00000294117,9606.ENSP00000296140,9606.ENSP00000348461,9606.ENSP00000354558,9606.ENSP00000451828	GNB3,GNG3,CCR1,RAC1,MTOR,AKT1
hsa05205	Proteoglycans in cancer	6	195	0.98	0.0014	9606.ENSP00000340944,9606.ENSP00000344220,9606.ENSP00000348461,9606.ENSP00000354558,9606.ENSP00000437489,9606.ENSP00000451828	PTPN11,PDPK1,RAC1,MTOR,FZD3,AKT1
hsa04144	Endocytosis	6	242	0.89	0.0033	9606.ENSP00000262305,9606.ENSP00000264710,9606.ENSP00000300935,9606.ENSP00000333547,9606.ENSP00000355651,9606.ENSP00000440005	RAB11FIP3,RAB10,RAB8A,RAB11B,RAB4A,ARF1
hsa04020	Calcium signaling pathway	5	179	0.94	0.0062	9606.ENSP00000262958,9606.ENSP00000276198,9606.ENSP00000294954,9606.ENSP00000303325,9606.ENSP00000430711	GNA15,HTR2C,LHCGR,TACR3,TRHR
hsa05231	Choline metabolism in cancer	4	98	1.1	0.0062	9606.ENSP00000344220,9606.ENSP00000348461,9606.ENSP00000354558,9606.ENSP00000451828	PDPK1,RAC1,MTOR,AKT1
hsa04931	Insulin resistance	4	107	1.06	0.0069	9606.ENSP00000340944,9606.ENSP00000344220,9606.ENSP00000354558,9606.ENSP00000451828	PTPN11,PDPK1,MTOR,AKT1
hsa04962	Vasopressin-regulated water reabsorption	3	44	1.33	0.0069	9606.ENSP00000314214,9606.ENSP00000333547,9606.ENSP00000354791	VAMP2,RAB11B,DCTN1
hsa04722	Neurotrophin signaling pathway	4	116	1.03	0.0076	9606.ENSP00000340944,9606.ENSP00000344220,9606.ENSP00000348461,9606.ENSP00000451828	PTPN11,PDPK1,RAC1,AKT1
hsa04014	Ras signaling pathway	5	228	0.83	0.0106	9606.ENSP00000229264,9606.ENSP00000294117,9606.ENSP00000340944,9606.ENSP00000348461,9606.ENSP00000451828	GNB3,GNG3,PTPN11,RAC1,AKT1
hsa04151	PI3K-Akt signaling pathway	6	348	0.73	0.0106	9606.ENSP00000229264,9606.ENSP00000294117,9606.ENSP00000344220,9606.ENSP00000348461,9606.ENSP00000354558,9606.ENSP00000451828	GNB3,GNG3,PDPK1,RAC1,MTOR,AKT1
hsa04371	Apelin signaling pathway	4	133	0.97	0.0106	9606.ENSP00000229264,9606.ENSP00000294117,9606.ENSP00000354558,9606.ENSP00000451828	GNB3,GNG3,MTOR,AKT1
hsa04926	Relaxin signaling pathway	4	130	0.98	0.0106	9606.ENSP00000229264,9606.ENSP00000262958,9606.ENSP00000294117,9606.ENSP00000451828	GNB3,GNA15,GNG3,AKT1
hsa04072	Phospholipase D signaling pathway	4	145	0.93	0.0117	9606.ENSP00000340944,9606.ENSP00000354558,9606.ENSP00000440005,9606.ENSP00000451828	PTPN11,MTOR,ARF1,AKT1
hsa04150	mTOR signaling pathway	4	148	0.92	0.0119	9606.ENSP00000344220,9606.ENSP00000354558,9606.ENSP00000437489,9606.ENSP00000451828	PDPK1,MTOR,FZD3,AKT1
hsa04664	Fc epsilon RI signaling pathway	3	67	1.14	0.0119	9606.ENSP00000344220,9606.ENSP00000348461,9606.ENSP00000451828	PDPK1,RAC1,AKT1
hsa04920	Adipocytokine signaling pathway	3	69	1.13	0.0119	9606.ENSP00000340944,9606.ENSP00000354558,9606.ENSP00000451828	PTPN11,MTOR,AKT1
hsa05211	Renal cell carcinoma	3	68	1.14	0.0119	9606.ENSP00000340944,9606.ENSP00000348461,9606.ENSP00000451828	PTPN11,RAC1,AKT1
hsa05212	Pancreatic cancer	3	74	1.1	0.013	9606.ENSP00000348461,9606.ENSP00000354558,9606.ENSP00000451828	RAC1,MTOR,AKT1
hsa04530	Tight junction	4	167	0.87	0.0141	9606.ENSP00000226207,9606.ENSP00000300935,9606.ENSP00000344666,9606.ENSP00000348461	MYH1,RAB8A,NF2,RAC1
hsa05210	Colorectal cancer	3	85	1.04	0.0173	9606.ENSP00000348461,9606.ENSP00000354558,9606.ENSP00000451828	RAC1,MTOR,AKT1
hsa04666	Fc gamma R-mediated phagocytosis	3	89	1.02	0.0188	9606.ENSP00000348461,9606.ENSP00000421280,9606.ENSP00000451828	RAC1,MYO10,AKT1
hsa05215	Prostate cancer	3	97	0.98	0.0229	9606.ENSP00000344220,9606.ENSP00000354558,9606.ENSP00000451828	PDPK1,MTOR,AKT1
hsa04015	Rap1 signaling pathway	4	203	0.79	0.0237	9606.ENSP00000348461,9606.ENSP00000358513,9606.ENSP00000386229,9606.ENSP00000451828	RAC1,CNR1,RGS14,AKT1
hsa04725	Cholinergic synapse	3	111	0.92	0.0305	9606.ENSP00000229264,9606.ENSP00000294117,9606.ENSP00000451828	GNB3,GNG3,AKT1
hsa04726	Serotonergic synapse	3	112	0.92	0.0305	9606.ENSP00000229264,9606.ENSP00000276198,9606.ENSP00000294117	GNB3,HTR2C,GNG3
hsa04071	Sphingolipid signaling pathway	3	116	0.9	0.031	9606.ENSP00000344220,9606.ENSP00000348461,9606.ENSP00000451828	PDPK1,RAC1,AKT1
hsa04919	Thyroid hormone signaling pathway	3	115	0.91	0.031	9606.ENSP00000344220,9606.ENSP00000354558,9606.ENSP00000451828	PDPK1,MTOR,AKT1
hsa05200	Pathways in cancer	6	515	0.56	0.031	9606.ENSP00000229264,9606.ENSP00000294117,9606.ENSP00000348461,9606.ENSP00000354558,9606.ENSP00000437489,9606.ENSP00000451828	GNB3,GNG3,RAC1,MTOR,FZD3,AKT1
hsa04140	Autophagy - animal	3	125	0.87	0.0354	9606.ENSP00000344220,9606.ENSP00000354558,9606.ENSP00000451828	PDPK1,MTOR,AKT1
hsa04728	Dopaminergic synapse	3	128	0.86	0.0366	9606.ENSP00000229264,9606.ENSP00000294117,9606.ENSP00000451828	GNB3,GNG3,AKT1
hsa04910	Insulin signaling pathway	3	134	0.84	0.0401	9606.ENSP00000344220,9606.ENSP00000354558,9606.ENSP00000451828	PDPK1,MTOR,AKT1
hsa04723	Retrograde endocannabinoid signaling	3	148	0.8	0.0497	9606.ENSP00000229264,9606.ENSP00000294117,9606.ENSP00000358513	GNB3,GNG3,CNR1
hsa05224	Breast cancer	3	147	0.8	0.0497	9606.ENSP00000354558,9606.ENSP00000437489,9606.ENSP00000451828	MTOR,FZD3,AKT1
hsa05226	Gastric cancer	3	147	0.8	0.0497	9606.ENSP00000354558,9606.ENSP00000437489,9606.ENSP00000451828	MTOR,FZD3,AKT1

## Sheet: SV2 (-) Gene List
input term	mapped gene	annotation
MAP6	MAP6	Microtubule-associated protein 6; Involved in microtubule stabilization in many cell types, including neuronal cells. Specifically has microtubule cold stabilizing activity. Involved in dendrite [...]
MAP2K1	MAP2K1	Dual specificity mitogen-activated protein kinase kinase 1; Dual specificity protein kinase which acts as an essential component of the MAP kinase signal transduction pathway. Binding of extrace [...]
KIAA1728	TANC1	Protein TANC1; May be a scaffold component in the postsynaptic density; Ankyrin repeat domain containing
KIAA1549	KIAA1549	UPF0606 protein KIAA1549; KIAA1549
KIAA1522	KIAA1522	Uncharacterized protein KIAA1522; KIAA1522
KIAA1467	KIAA1467	Protein FAM234B; KIAA1467
FLJ40321	TPRX1	Tetra-peptide repeat homeobox protein 1; PRD class homeoboxes and pseudogenes
FLJ39660	CCDC150	Coiled-coil domain containing 150
FLJ36878	TMEM102	Transmembrane protein 102; Selectively involved in CSF2 deprivation-induced apoptosis via a mitochondria-dependent pathway
FLJ36754	SREK1IP1	Protein SREK1IP1; Possible splicing regulator involved in the control of cellular survival
TDRD1	TDRD1	Tudor domain-containing protein 1; Plays a central role during spermatogenesis by participating in the repression transposable elements and preventing their mobilization, which is essential for [...]
TDE2L	SERINC2	Serine incorporator 2; Belongs to the TDE1 family
TBC1D2	TBC1D2	TBC1 domain family member 2A; Acts as GTPase-activating protein for RAB7A. Signal effector acting as a linker between RAC1 and RAB7A, leading to RAB7A inactivation and subsequent inhibition of c [...]
SURF1	SURF1	Surfeit locus protein 1; Component of the MITRAC (mitochondrial translation regulation assembly intermediate of cytochrome c oxidase complex) complex, that regulates cytochrome c oxidase assembly
FLJ22471	CCDC92	Coiled-coil domain containing 92
FLJ21347	SPATA20	Spermatogenesis-associated protein 20; May play a role in fertility regulation
FLJ20321	CASZ1	Zinc finger protein castor homolog 1; Transcriptional activator. Involved in vascular assembly and morphogenesis through direct transcriptional regulation of EGFL7; Zinc fingers C2H2-type
FLJ14154	NAA60	N-alpha-acetyltransferase 60; N-alpha-acetyltransferase that specifically mediates the acetylation of N-terminal residues of the transmembrane proteins, with a strong preference for N-termini fa [...]
C9ORF91	C9orf91	Transmembrane protein 268; Chromosome 9 open reading frame 91
C7ORF36	YAE1D1	Yae1 domain containing 1
C6ORF151	SNRNP48	U11/U12 small nuclear ribonucleoprotein 48 kDa protein; Likely involved in U12-type 5' splice site recognition; U11/U12 di-snRNP
C22ORF3	RHBDD3	Rhomboid domain containing 3
ZNF451	ZNF451	E3 SUMO-protein ligase ZNF451; E3 SUMO-protein ligase; has a preference for SUMO2 and SUMO3 and facilitates UBE2I/UBC9-mediated sumoylation of target proteins. Plays a role in protein SUMO2 modi [...]
ZNF426	ZNF426	Zinc finger protein 426; May be involved in transcriptional regulation; Zinc fingers C2H2-type
ZNF41	ZNF41	Zinc finger protein 41; May be involved in transcriptional regulation; Belongs to the krueppel C2H2-type zinc-finger protein family
ZNF226	ZNF226	Zinc finger protein 226; May be involved in transcriptional regulation; Zinc fingers C2H2-type
SNX27	SNX27	Sorting nexin-27; Involved in the retrograde transport from endosome to plasma membrane, a trafficking pathway that promotes the recycling of internalized transmembrane proteins. Following inter [...]
PI4KII	PI4K2A	Phosphatidylinositol 4-kinase type 2-alpha; Membrane-bound phosphatidylinositol-4 kinase (PI4- kinase) that catalyzes the phosphorylation of phosphatidylinositol (PI) to phosphatidylinositol 4-p [...]
EHD4	EHD4	EH domain-containing protein 4; ATP- and membrane-binding protein that probably controls membrane reorganization/tubulation upon ATP hydrolysis. Plays a role in early endosomal transport; EF-han [...]
EED	EED	Polycomb protein EED; Polycomb group (PcG) protein. Component of the PRC2/EED- EZH2 complex, which methylates 'Lys-9' and 'Lys-27' of histone H3, leading to transcriptional repression of the aff [...]
EAF1	EAF1	ELL-associated factor 1; Acts as a transcriptional transactivator of ELL and ELL2 elongation activities; Belongs to the EAF family
CDC40	CDC40	Pre-mRNA-processing factor 17; Associates with the spliceosome late in the splicing pathway and may function in the second step of pre-mRNA splicing; Spliceosomal Bact complex
BIG1	ARFGEF1	Brefeldin A-inhibited guanine nucleotide-exchange protein 1; Promotes guanine-nucleotide exchange on ARF1 and ARF3. Promotes the activation of ARF1/ARF3 through replacement of GDP with GTP. Invo [...]
ATP6V0E	ATP6V0E1	V-type proton ATPase subunit e 1; Vacuolar ATPase is responsible for acidifying a variety of intracellular compartments in eukaryotic cells; Belongs to the V-ATPase e1/e2 subunit family
ATP6AP1	ATP6AP1	V-type proton ATPase subunit S1; Accessory subunit of the proton-transporting vacuolar (V)-ATPase protein pump, which is required for luminal acidification of secretory vesicles. Guides the V-ty [...]
ATP5G3	ATP5G3	ATP synthase F(0) complex subunit C3, mitochondrial; Mitochondrial membrane ATP synthase (F(1)F(0) ATP synthase or Complex V) produces ATP from ADP in the presence of a proton gradient across th [...]
CLTC	CLTC	Clathrin heavy chain 1; Clathrin is the major protein of the polyhedral coat of coated pits and vesicles. Two different adapter protein complexes link the clathrin lattice either to the plasma m [...]
AP2M1	AP2M1	AP-2 complex subunit mu; Component of the adaptor protein complex 2 (AP-2). Adaptor protein complexes function in protein transport via transport vesicles in different membrane traffic pathways. [...]

## Sheet: SV2 (-) Biological Process
#term ID	term description	observed gene count	background gene count	strength	false discovery rate	matching proteins in your network (IDs)	matching proteins in your network (labels)
GO:0015988	energy coupled proton transmembrane transport, against electrochemical gradient	3	29	1.73	0.0303	9606.ENSP00000284727,9606.ENSP00000358777,9606.ENSP00000429690	ATP5G3,ATP6AP1,ATP6V0E1
GO:0033572	transferrin transport	3	36	1.63	0.0303	9606.ENSP00000358777,9606.ENSP00000429690,9606.ENSP00000479606	ATP6AP1,ATP6V0E1,CLTC
GO:0072512	trivalent inorganic cation transport	3	39	1.6	0.0303	9606.ENSP00000358777,9606.ENSP00000429690,9606.ENSP00000479606	ATP6AP1,ATP6V0E1,CLTC
GO:1902600	proton transmembrane transport	4	137	1.18	0.0369	9606.ENSP00000284727,9606.ENSP00000358777,9606.ENSP00000361042,9606.ENSP00000429690	ATP5G3,ATP6AP1,SURF1,ATP6V0E1
GO:0032802	low-density lipoprotein particle receptor catabolic process	2	10	2.01	0.045	9606.ENSP00000292807,9606.ENSP00000479606	AP2M1,CLTC

## Sheet: SV2 (-) Molecular Function
#term ID	term description	observed gene count	background gene count	strength	false discovery rate	matching proteins in your network (IDs)	matching proteins in your network (labels)
GO:0044769	ATPase activity, coupled to transmembrane movement of ions, rotational mechanism	3	30	1.71	0.0064	9606.ENSP00000284727,9606.ENSP00000358777,9606.ENSP00000429690	ATP5G3,ATP6AP1,ATP6V0E1
GO:0015078	proton transmembrane transporter activity	4	120	1.23	0.0087	9606.ENSP00000284727,9606.ENSP00000358777,9606.ENSP00000361042,9606.ENSP00000429690	ATP5G3,ATP6AP1,SURF1,ATP6V0E1
GO:0019829	cation-transporting ATPase activity	3	61	1.4	0.0157	9606.ENSP00000284727,9606.ENSP00000358777,9606.ENSP00000429690	ATP5G3,ATP6AP1,ATP6V0E1
GO:0046933	proton-transporting ATP synthase activity, rotational mechanism	2	13	1.9	0.0157	9606.ENSP00000284727,9606.ENSP00000358777	ATP5G3,ATP6AP1
GO:0008553	proton-exporting ATPase activity, phosphorylative mechanism	2	23	1.65	0.0235	9606.ENSP00000358777,9606.ENSP00000429690	ATP6AP1,ATP6V0E1
GO:0046961	proton-transporting ATPase activity, rotational mechanism	2	21	1.69	0.0235	9606.ENSP00000358777,9606.ENSP00000429690	ATP6AP1,ATP6V0E1
GO:0050750	low-density lipoprotein particle receptor binding	2	22	1.67	0.0235	9606.ENSP00000292807,9606.ENSP00000479606	AP2M1,CLTC
GO:0043492	ATPase activity, coupled to movement of substances	3	124	1.1	0.0273	9606.ENSP00000284727,9606.ENSP00000358777,9606.ENSP00000429690	ATP5G3,ATP6AP1,ATP6V0E1

## Sheet: SV2 (-) Cellular Component
#term ID	term description	observed gene count	background gene count	strength	false discovery rate	matching proteins in your network (IDs)	matching proteins in your network (labels)
GO:0010008	endosome membrane	7	457	0.9	0.006	9606.ENSP00000220325,9606.ENSP00000292807,9606.ENSP00000357836,9606.ENSP00000358777,9606.ENSP00000359665,9606.ENSP00000429690,9606.ENSP00000479606	EHD4,AP2M1,SNX27,ATP6AP1,PI4K2A,ATP6V0E1,CLTC
GO:0016469	proton-transporting two-sector ATPase complex	3	49	1.5	0.0156	9606.ENSP00000284727,9606.ENSP00000358777,9606.ENSP00000429690	ATP5G3,ATP6AP1,ATP6V0E1
GO:0005768	endosome	8	876	0.67	0.0181	9606.ENSP00000220325,9606.ENSP00000292807,9606.ENSP00000302486,9606.ENSP00000357836,9606.ENSP00000358777,9606.ENSP00000359665,9606.ENSP00000429690,9606.ENSP00000479606	EHD4,AP2M1,MAP2K1,SNX27,ATP6AP1,PI4K2A,ATP6V0E1,CLTC
GO:0030132	clathrin coat of coated pit	2	13	1.9	0.0212	9606.ENSP00000292807,9606.ENSP00000479606	AP2M1,CLTC
GO:0036020	endolysosome membrane	2	15	1.84	0.0219	9606.ENSP00000292807,9606.ENSP00000479606	AP2M1,CLTC
GO:0030125	clathrin vesicle coat	2	21	1.69	0.0337	9606.ENSP00000292807,9606.ENSP00000479606	AP2M1,CLTC
GO:0033176	proton-transporting V-type ATPase complex	2	25	1.61	0.0337	9606.ENSP00000358777,9606.ENSP00000429690	ATP6AP1,ATP6V0E1
GO:0033177	proton-transporting two-sector ATPase complex, proton-transporting domain	2	23	1.65	0.0337	9606.ENSP00000284727,9606.ENSP00000429690	ATP5G3,ATP6V0E1
GO:0098588	bounding membrane of organelle	11	1950	0.46	0.0337	9606.ENSP00000220325,9606.ENSP00000262215,9606.ENSP00000284727,9606.ENSP00000292807,9606.ENSP00000307093,9606.ENSP00000357836,9606.ENSP00000358777,9606.ENSP00000359665,9606.ENSP00000385903,9606.ENSP00000429690,9606.ENSP00000479606	EHD4,ARFGEF1,ATP5G3,AP2M1,MAP6,SNX27,ATP6AP1,PI4K2A,NAA60,ATP6V0E1,CLTC
GO:0030669	clathrin-coated endocytic vesicle membrane	2	35	1.47	0.0475	9606.ENSP00000292807,9606.ENSP00000479606	AP2M1,CLTC
GO:0098805	whole membrane	9	1554	0.47	0.0475	9606.ENSP00000220325,9606.ENSP00000284727,9606.ENSP00000292807,9606.ENSP00000307093,9606.ENSP00000357836,9606.ENSP00000358777,9606.ENSP00000359665,9606.ENSP00000429690,9606.ENSP00000479606	EHD4,ATP5G3,AP2M1,MAP6,SNX27,ATP6AP1,PI4K2A,ATP6V0E1,CLTC
GO:0031901	early endosome membrane	3	143	1.03	0.0486	9606.ENSP00000220325,9606.ENSP00000357836,9606.ENSP00000359665	EHD4,SNX27,PI4K2A
GO:0030666	endocytic vesicle membrane	3	152	1.01	0.0499	9606.ENSP00000292807,9606.ENSP00000429690,9606.ENSP00000479606	AP2M1,ATP6V0E1,CLTC

## Sheet: SV2 (-) KEGG pathways
#term ID	term description	observed gene count	background gene count	strength	false discovery rate	matching proteins in your network (IDs)	matching proteins in your network (labels)
hsa04721	Synaptic vesicle cycle	3	61	1.4	0.0245	9606.ENSP00000292807,9606.ENSP00000429690,9606.ENSP00000479606	AP2M1,ATP6V0E1,CLTC
