# Supplementary material for: Botulinum toxin intoxication requires retrograde transport and membrane translocation at the ER in RenVM neurons
Source: eLife. 2024 Aug 28;12:RP92806. doi: 10.7554/eLife.92806 (PMC11357346; doi:10.7554/eLife.92806)
Supplement: Supplementary file 2. — The file includes the genes and the gene annotations. [file elife-92806-supp2.xlsx]

## Sheet: BoNTA (+) regulators
input term	mapped gene	annotation
FGF21	FGF21	Fibroblast growth factor 21; Stimulates glucose uptake in differentiated adipocytes via the induction of glucose transporter SLC2A1/GLUT1 expression (but not SLC2A4/GLUT4 expression). Activity r [...]
CXCL1	CXCL1	Growth-regulated alpha protein; Has chemotactic activity for neutrophils. May play a role in inflammation and exerts its effects on endothelial cells in an autocrine fashion. In vitro, the proce [...]
GPR58	TAAR2	Trace amine-associated receptor 2; Orphan receptor; Belongs to the G-protein coupled receptor 1 family
FBS1	FBXO2	F-box only protein 2; Substrate recognition component of a SCF (SKP1-CUL1-F- box protein) E3 ubiquitin-protein ligase complex that mediates the ubiquitination and subsequent proteasomal degradat [...]
C9ORF126	SCAI	Protein SCAI; Tumor suppressor which functions to suppress MKL1- induced SRF transcriptional activity. May function in the RHOA- DIAPH1 signal transduction pathway and regulate cell migration th [...]
POLR2L	POLR2L	DNA-directed RNA polymerases I, II, and III subunit RPABC5; DNA-dependent RNA polymerase catalyzes the transcription of DNA into RNA using the four ribonucleoside triphosphates as substrates. Co [...]
REC14	WDR61	WD repeat-containing protein 61; Component of the PAF1 complex (PAF1C) which has multiple functions during transcription by RNA polymerase II and is implicated in regulation of development and m [...]
GPD2	GPD2	Glycerol-3-phosphate dehydrogenase, mitochondrial; Glycerol-3-phosphate dehydrogenase 2; Belongs to the FAD-dependent glycerol-3-phosphate dehydrogenase family
FLJ11016	RBM41	RNA-binding protein 41; May bind RNA; RNA binding motif containing
ANKRD32	ANKRD32	SMC5-SMC6 complex localization factor protein 1; Plays a role in the DNA damage response (DDR) pathway by regulating postreplication repair of UV-damaged DNA and genomic stability maintenance. T [...]
ASPN	ASPN	Asporin; Negatively regulates periodontal ligament (PDL) differentiation and mineralization to ensure that the PDL is not ossified and to maintain homeostasis of the tooth-supporting system. Inh [...]
ENTPD8	ENTPD8	Ectonucleoside triphosphate diphosphohydrolase 8; Canalicular ectonucleoside NTPDase responsible for the main hepatic NTPDase activity. Ectonucleoside NTPDases catalyze the hydrolysis of gamma- [...]
ZDHHC19	ZDHHC19	Probable palmitoyltransferase ZDHHC19; Zinc finger DHHC-type containing 19; Belongs to the DHHC palmitoyltransferase family
FAM35A	FAM35A	Protein FAM35A; Family with sequence similarity 35 member A
FNBP3	PRPF40A	Pre-mRNA-processing factor 40 homolog A; Binds to WASL/N-WASP and suppresses its translocation from the nucleus to the cytoplasm, thereby inhibiting its cytoplasmic function (By similarity). Pla [...]
ARHGAP22	ARHGAP22	Rho GTPase-activating protein 22; Rho GTPase-activating protein involved in the signal transduction pathway that regulates endothelial cell capillary tube formation during angiogenesis. Acts as [...]
PILRA	PILRA	Paired immunoglobulin-like type 2 receptor alpha; Paired receptors consist of highly related activating and inhibitory receptors and are widely involved in the regulation of the immune system. P [...]
CATSPER2	CATSPER2	Cation channel sperm-associated protein 2; Voltage-gated calcium channel that plays a central role in calcium-dependent physiological responses essential for successful fertilization, such as sp [...]
USP53	USP53	Inactive ubiquitin carboxyl-terminal hydrolase 53; Tight junction-associated protein that is involved in the survival of auditory hair cells and hearing. Maybe by modulating the barrier properti [...]
CGN	CGN	Cingulin; Probably plays a role in the formation and regulation of the tight junction (TJ) paracellular permeability barrier; Belongs to the cingulin family
TEX13A	TEX13A	Testis-expressed protein 13A; Zinc fingers RANBP2-type ; Belongs to the TEX13 family
MFAP1	MFAP1	Microfibrillar-associated protein 1; May be required for pre-mRNA splicing; Spliceosomal B complex
PARK7	PARK7	Protein/nucleic acid deglycase DJ-1; Protein and nucleotide deglycase that catalyzes the deglycation of the Maillard adducts formed between amino groups of proteins or nucleotides and reactive c [...]
ZCCHC2	ZCCHC2	Zinc finger CCHC-type containing 2
MSRA	MSRA	Mitochondrial peptide methionine sulfoxide reductase; Has an important function as a repair enzyme for proteins that have been inactivated by oxidation. Catalyzes the reversible oxidation-reduct [...]
EIF3K	EIF3K	Eukaryotic translation initiation factor 3 subunit K; Component of the eukaryotic translation initiation factor 3 (eIF-3) complex, which is required for several steps in the initiation of protei [...]
SNX1	SNX1	Sorting nexin-1; Involved in several stages of intracellular trafficking. Interacts with membranes containing phosphatidylinositol 3- phosphate (PtdIns(3P)) or phosphatidylinositol 3,5-bisphosph [...]
MTCP1	MTCP1	Protein p13 MTCP-1; Enhances the phosphorylation and activation of AKT1 and AKT2
TXNDC17	TXNDC17	Thioredoxin domain-containing protein 17; Disulfide reductase. May participate in various redox reactions through the reversible oxidation of its active center dithiol to a disulfide and catalyz [...]
GAGED3	XAGE2B	X antigen family, member 2B
WAS	WAS	Wiskott-Aldrich syndrome protein; Effector protein for Rho-type GTPases. Regulates actin filament reorganization via its interaction with the Arp2/3 complex. Important for efficient actin polyme [...]
ZNF586	ZNF586	Zinc finger protein 586; May be involved in transcriptional regulation; Zinc fingers C2H2-type
KIAA1345	CC2D2A	Coiled-coil and C2 domain-containing protein 2A; Component of the tectonic-like complex, a complex localized at the transition zone of primary cilia and acting as a barrier that prevents diffusi [...]
PCDHB7	PCDHB7	Protocadherin beta-7; Potential calcium-dependent cell-adhesion protein. May be involved in the establishment and maintenance of specific neuronal connections in the brain; Clustered protocadher [...]
TBC1D14	TBC1D14	TBC1 domain family member 14; Negative regulator of starvation-induced autophagosome formation
TDRD1	TDRD1	Tudor domain-containing protein 1; Plays a central role during spermatogenesis by participating in the repression transposable elements and preventing their mobilization, which is essential for [...]
KCNJ6	KCNJ6	G protein-activated inward rectifier potassium channel 2; This potassium channel may be involved in the regulation of insulin secretion by glucose and/or neurotransmitters acting through G-prote [...]
PUSL1	PUSL1	Pseudouridylate synthase-like 1; Belongs to the tRNA pseudouridine synthase TruA family
FLJ10326	IARS2	Isoleucine--tRNA ligase, mitochondrial; isoleucyl-tRNA synthetase 2, mitochondrial; Aminoacyl tRNA synthetases, Class I
SCT	SCT	Secretin; Stimulates formation of NaHCO(3)-rich pancreatic juice and secretion of NaHCO(3)-rich bile and inhibits HCl production by the stomach; Endogenous ligands
TXNRD1	TXNRD1	Thioredoxin reductase 1, cytoplasmic; Isoform 1 may possess glutaredoxin activity as well as thioredoxin reductase activity and induces actin and tubulin polymerization, leading to formation of [...]
HSPA4	HSPA4	Heat shock protein family A member 4; Belongs to the heat shock protein 70 family
KIF27	KIF27	Kinesin-like protein KIF27; Plays an essential role in motile ciliogenesis; Kinesins
LILRA2	LILRA2	Leukocyte immunoglobulin-like receptor subfamily A member 2; Part of the innate immune responses against microbial infection. Specifically recognizes a set of N-terminally truncated immunoglobul [...]
KCNJ9	KCNJ9	G protein-activated inward rectifier potassium channel 3; This receptor is controlled by G proteins. Inward rectifier potassium channels are characterized by a greater tendency to allow potassiu [...]
GPR58	TAAR2	Trace amine-associated receptor 2; Orphan receptor; Belongs to the G-protein coupled receptor 1 family
HSPA14	HSPA14	Heat shock 70 kDa protein 14; Component of the ribosome-associated complex (RAC), a complex involved in folding or maintaining nascent polypeptides in a folding-competent state. In the RAC compl [...]
SERP1	SERP1	Stress-associated endoplasmic reticulum protein 1; Interacts with target proteins during their translocation into the lumen of the endoplasmic reticulum. Protects unfolded target proteins agains [...]
VPS26A	VPS26A	Vacuolar protein sorting-associated protein 26A; Acts as component of the retromer cargo-selective complex (CSC). The CSC is believed to be the core functional component of retromer or respectiv [...]
TRAM	TRAM1	Translocating chain-associated membrane protein 1; Stimulatory or required for the translocation of secretory proteins across the ER membrane; TLC domain containing
NXN	NXN	Nucleoredoxin; Functions as a redox-dependent negative regulator of the Wnt signaling pathway, possibly by preventing ubiquitination of DVL3 by the BCR(KLHL12) complex. May also function as a tr [...]
GPR22	GPR22	Probable G-protein coupled receptor 22; Orphan receptor; G protein-coupled receptors, Class A orphans
GBL	MLST8	Target of rapamycin complex subunit LST8; Subunit of both mTORC1 and mTORC2, which regulates cell growth and survival in response to nutrient and hormonal signals. mTORC1 is activated in respons [...]
KLHL7	KLHL7	Kelch-like protein 7; Substrate-specific adapter of a BCR (BTB-CUL3-RBX1) E3 ubiquitin ligase complex. The BCR(KLHL7) complex acts by mediating ubiquitination and subsequent degradation of subst [...]
PGPEP1	PGPEP1	Pyroglutamyl-peptidase 1; Removes 5-oxoproline from various penultimate amino acid residues except L-proline
DAP13	NDUFA12	NADH dehydrogenase [ubiquinone] 1 alpha subcomplex subunit 12; Accessory subunit of the mitochondrial membrane respiratory chain NADH dehydrogenase (Complex I), that is believed not to be involv [...]
SEC61B	SEC61B	Protein transport protein Sec61 subunit beta; Necessary for protein translocation in the endoplasmic reticulum; Belongs to the SEC61-beta family
NOL7	NOL7	Nucleolar protein 7
MOPT	MORN2	MORN repeat-containing protein 2; Might have a role in spermatogenesis
DYNLL1	DYNLL1	Dynein light chain 1, cytoplasmic; Acts as one of several non-catalytic accessory components of the cytoplasmic dynein 1 complex that are thought to be involved in linking dynein to cargos and to adapter proteins that regulate dynein function
EPHB6	EPHB6	Ephrin type-B receptor 6; Kinase-defective receptor for members of the ephrin-B family. Binds to ephrin-B1 and ephrin-B2. Modulates cell adhesion and migration by exerting both positive and nega [...]
MOCS2	MOCS2	Molybdopterin synthase catalytic subunit; Catalytic subunit of the molybdopterin synthase complex, a complex that catalyzes the conversion of precursor Z into molybdopterin. Acts by mediating th [...]
SMOX	SMOX	Spermine oxidase; Flavoenzyme which catalyzes the oxidation of spermine to spermidine. Can also use N(1)-acetylspermine and spermidine as substrates, with different affinity depending on the iso [...]
KIAA1838	FAM120B	Constitutive coactivator of peroxisome proliferator-activated receptor gamma; Functions as a transactivator of PPARG and ESR1. Functions in adipogenesis through PPARG activation (By similarity); [...]
EIF4E2	EIF4E2	Eukaryotic translation initiation factor 4E type 2; Recognizes and binds the 7-methylguanosine-containing mRNA cap during an early step in the initiation. Acts as a repressor of translation init [...]
SUSD3	SUSD3	Sushi domain-containing protein 3; May play a role in breast tumorigenesis by promoting estrogen-dependent cell proliferation, cell-cell interactions and migration; Sushi domain containing
SLC17A6	SLC17A6	Vesicular glutamate transporter 2; Mediates the uptake of glutamate into synaptic vesicles at presynaptic nerve terminals of excitatory neural cells. May also mediate the transport of inorganic [...]
ETV4	ETV4	ETS translocation variant 4; Transcriptional activator that binds to the enhancer of the adenovirus E1A gene; the core-binding sequence is 5'[AC]GGA[AT]GT-3'; ETS transcription factor family
FLJ23436	ZNF768	Zinc finger protein 768; May be involved in transcriptional regulation; Zinc fingers C2H2-type
MUC5B	MUC5B	Mucin-5B; Gel-forming mucin that is thought to contribute to the lubricating and viscoelastic properties of whole saliva and cervical mucus; Mucins
SEC61G	SEC61G	Protein transport protein Sec61 subunit gamma; Necessary for protein translocation in the endoplasmic reticulum; Belongs to the SecE/SEC61-gamma family
MLSTD1	FAR2	Fatty acyl-CoA reductase 2; Catalyzes the reduction of saturated but not unsaturated C16 or C18 fatty acyl-CoA to fatty alcohols. A lower activity can be observed with shorter fatty acyl-CoA sub [...]
VPS35	VPS35	Vacuolar protein sorting-associated protein 35; Acts as component of the retromer cargo-selective complex (CSC). The CSC is believed to be the core functional component of retromer or respective [...]
GNAS	GNAS	Guanine nucleotide-binding protein G(s) subunit alpha isoforms XLas; Guanine nucleotide-binding proteins (G proteins) function as transducers in numerous signaling pathways controlled by G prote [...]
IL20RA	IL20RA	Interleukin-20 receptor subunit alpha; The IL20RA/IL20RB dimer is a receptor for IL19, IL20 and IL24. The IL20RA/IL10RB dimer is a receptor for IL26; Interleukin receptors
SRC	SRC	Proto-oncogene tyrosine-protein kinase Src; Non-receptor protein tyrosine kinase which is activated following engagement of many different classes of cellular receptors including immune response [...]
GNAS	GNAS	Guanine nucleotide-binding protein G(s) subunit alpha isoforms XLas; Guanine nucleotide-binding proteins (G proteins) function as transducers in numerous signaling pathways controlled by G prote [...]
IL20	IL20	Interleukin-20; Proinflammatory and angiogenic cytokine that may be involved in epidermal function and psoriasis. Angiogenic and proliferative activities are antagonized by IL10. May act through [...]
C14ORF101	TMEM260	Transmembrane protein 260; Belongs to the TMEM260 family
SNX27	SNX27	Sorting nexin-27; Involved in the retrograde transport from endosome to plasma membrane, a trafficking pathway that promotes the recycling of internalized transmembrane proteins. Following inter [...]
ASXL2	ASXL2	Putative Polycomb group protein ASXL2; Putative Polycomb group (PcG) protein. PcG proteins act by forming multiprotein complexes, which are required to maintain the transcriptionally repressive [...]
FLJ34512	CCDC78	Coiled-coil domain-containing protein 78; Component of the deuterosome, a structure that promotes de novo centriole amplification in multiciliated cells that can generate more than 100 centriole [...]
STRN3	STRN3	Striatin-3; Binds calmodulin in a calcium dependent manner. May function as scaffolding or signaling protein; Protein phosphatase 2 regulatory subunits
GALGT	B4GALNT1	Beta-1,4 N-acetylgalactosaminyltransferase 1; Involved in the biosynthesis of gangliosides GM2, GD2 and GA2; Beta 4-glycosyltransferases
TEX15	TEX15	Testis-expressed protein 15; Required during spermatogenesis for normal chromosome synapsis and meiotic recombination in germ cells. Necessary for formation of DMC1 and RAD51 foci on meiotic chr [...]
TRPC5	TRPC5	Short transient receptor potential channel 5; Thought to form a receptor-activated non-selective calcium permeant cation channel. Probably is operated by a phosphatidylinositol second messenger [...]
FANCE	FANCE	Fanconi anemia group E protein; As part of the Fanconi anemia (FA) complex functions in DNA cross-links repair. Required for the nuclear accumulation of FANCC and provides a critical bridge betw [...]
SYT12	SYT12	Synaptotagmin-12; May be involved in Ca(2+)-dependent exocytosis of secretory vesicles through Ca(2+) and phospholipid binding to the C2 domain or may serve as Ca(2+) sensors in the process of v [...]
TEX11	TEX11	Testis-expressed protein 11; Regulator of crossing-over during meiosis. Involved in initiation and/or maintenance of chromosome synapsis and formation of crossovers (By similarity)
DCLRE1B	DCLRE1B	5' exonuclease Apollo; 5'-3' exonuclease that plays a central role in telomere maintenance and protection during S-phase. Participates in the protection of telomeres against non-homologous end-j [...]
FLJ32915	HYLS1	Hydrolethalus syndrome protein 1; Plays a role in ciliogenesis
CEP72	CEP72	Centrosomal protein of 72 kDa; Involved in the recruitment of key centrosomal proteins to the centrosome. Provides centrosomal microtubule-nucleation activity on the gamma-tubulin ring complexes [...]

## Sheet: BoNTA (-) regulators
input term	mapped gene	annotation
SAT	SAT1	Diamine acetyltransferase 1; Enzyme which catalyzes the acetylation of polyamines. Substrate specificity: norspermidine = spermidine >> spermine > N(1)-acetylspermine > putrescine. This highly r [...]
ILDR1	ILDR1	Immunoglobulin-like domain-containing receptor 1; Putative membrane receptor; Deafness associated genes
C5ORF12	SERINC5	Serine incorporator 5; Restriction factor required to restrict infectivity of lentiviruses, such as HIV-1: acts by inhibiting an early step of viral infection. Impairs the penetration of the vir [...]
CLDN6	CLDN6	Claudin-6; Plays a major role in tight junction-specific obliteration of the intercellular space; Claudins
C9ORF20	TTLL11	Tubulin polyglutamylase TTLL11; Polyglutamase which preferentially modifies alpha- tubulin. Involved in the side-chain elongation step of the polyglutamylation reaction rather than in the initia [...]
JMJD5	KDM8	JmjC domain-containing protein 5; Histone demethylase required for G2/M phase cell cycle progression. Specifically demethylates dimethylated 'Lys-36' (H3K36me2) of histone H3, an epigenetic repr [...]
MGC3207	MRI1	Methylthioribose-1-phosphate isomerase; Catalyzes the interconversion of methylthioribose-1- phosphate (MTR-1-P) into methylthioribulose-1-phosphate (MTRu-1- P). Independently from catalytic act [...]
HOOK2	HOOK2	Protein Hook homolog 2; Component of the FTS/Hook/FHIP complex (FHF complex). The FHF complex may function to promote vesicle trafficking and/or fusion via the homotypic vesicular protein sortin [...]
C1ORF17	COLGALT2	Procollagen galactosyltransferase 2; Beta-galactosyltransferase that transfers beta-galactose to hydroxylysine residues of collagen; Belongs to the glycosyltransferase 25 family
C13ORF8	CHAMP1	Chromosome alignment-maintaining phosphoprotein 1; Required for proper alignment of chromosomes at metaphase and their accurate segregation during mitosis. Involved in the maintenance of spindle [...]
THUMPD1	THUMPD1	THUMP domain-containing protein 1; Functions as a tRNA-binding adapter to mediate NAT10- dependent tRNA acetylation
C9ORF52	TTC39B	Tetratricopeptide repeat domain containing; Belongs to the TTC39 family
MMAA	MMAA	Methylmalonic aciduria type A protein, mitochondrial; GTPase, binds and hydrolyzes GTP. Involved in intracellular vitamin B12 metabolism, mediates the transport of cobalamin (Cbl) into mitochond [...]
TNFAIP2	TNFAIP2	Tumor necrosis factor alpha-induced protein 2; May play a role as a mediator of inflammation and angiogenesis
MYL7	MYL7	Myosin regulatory light chain 2, atrial isoform; EF-hand domain containing
ROM1	ROM1	Rod outer segment membrane protein 1; May function as an adhesion molecule involved in stabilization and compaction of outer segment disks or in the maintenance of the curvature of the rim. It i [...]
SUGT1	SUGT1	Protein SGT1 homolog; May play a role in ubiquitination and subsequent proteasomal degradation of target proteins
LPPR4	LPPR4	Phospholipid phosphatase-related protein type 4; Hydrolyzes lysophosphatidic acid (LPA). Facilitates axonal outgrowth during development and regenerative sprouting. In the outgrowing axons acts [...]
DRG2	DRG2	Developmentally-regulated GTP-binding protein 2; May play a role in cell proliferation, differentiation and death; Belongs to the TRAFAC class OBG-HflX-like GTPase superfamily. OBG GTPase family
SEPN1	SEPN1	Selenoprotein N; Isoform 2: Plays an important role in cell protection against oxidative stress and in the regulation of redox-related calcium homeostasis. Regulates the calcium level of the ER [...]
GSN	GSN	Gelsolin; Calcium-regulated, actin-modulating protein that binds to the plus (or barbed) ends of actin monomers or filaments, preventing monomer exchange (end-blocking or capping). It can promot [...]
PSMF1	PSMF1	Proteasome inhibitor PI31 subunit; Plays an important role in control of proteasome function. Inhibits the hydrolysis of protein and peptide substrates by the 20S proteasome. Also inhibits the a [...]
GNG10	GNG10	Guanine nucleotide-binding protein G(I)/G(S)/G(O) subunit gamma-10; Guanine nucleotide-binding proteins (G proteins) are involved as a modulator or transducer in various transmembrane signaling [...]
REPRIMO	RPRM	Protein reprimo; May be involved in the regulation of p53-dependent G2 arrest of the cell cycle. Seems to induce cell cycle arrest by inhibiting CDK1 activity and nuclear translocation of the CD [...]
MYO10	MYO10	Unconventional myosin-X; Myosins are actin-based motor molecules with ATPase activity. Unconventional myosins serve in intracellular movements. MYO10 binds to actin filaments and actin bundles a [...]
MGC35274	LYSMD2	LysM and putative peptidoglycan-binding domain-containing protein 2; LysM domain containing 2
RASEF	RASEF	Ras and EF-hand domain-containing protein; Binds predominantly GDP, and also GTP; EF-hand domain containing
CLDN6	CLDN6	Claudin-6; Plays a major role in tight junction-specific obliteration of the intercellular space; Claudins
C18ORF9	CEP76	Centrosomal protein of 76 kDa; Centrosomal protein involved in regulation of centriole duplication. Required to limit centriole duplication to once per cell cycle by preventing centriole redupli [...]
INPP5B	INPP5B	Type II inositol 1,4,5-trisphosphate 5-phosphatase; Hydrolyzes phosphatidylinositol 4,5-bisphosphate (PtIns(4,5)P2) and the signaling molecule phosphatidylinositol 1,4,5-trisphosphate (PtIns(1,4 [...]
LAMP2	LAMP2	Lysosome-associated membrane glycoprotein 2; Plays an important role in chaperone-mediated autophagy, a process that mediates lysosomal degradation of proteins in response to various stresses an [...]
MAFF	MAFF	Transcription factor MafF; Interacts with the upstream promoter region of the oxytocin receptor gene. May be a transcriptional enhancer in the up-regulation of the oxytocin receptor gene at part [...]
IL17D	IL17D	Interleukin-17D; Induces expression of IL6, CXCL8/IL8, and CSF2/GM-CSF from endothelial cells; Interleukins
TRRAP	TRRAP	Transformation/transcription domain-associated protein; Adapter protein, which is found in various multiprotein chromatin complexes with histone acetyltransferase activity (HAT), which gives a s [...]
RILP	RILP	Rab-interacting lysosomal protein; Rab effector playing a role in late endocytic transport to degradative compartments. Involved in the regulation of lysosomal morphology and distribution. Induc [...]
MAP7	MAP7	Ensconsin; Microtubule-stabilizing protein that may play an important role during reorganization of microtubules during polarization and differentiation of epithelial cells. Associates with micr [...]
TANK	TANK	TRAF family member-associated NF-kappa-B activator; Adapter protein involved in I-kappa-B-kinase (IKK) regulation which constitutively binds TBK1 and IKBKE playing a role in antiviral innate imm [...]
GPC2	GPC2	Glypican-2; Cell surface proteoglycan that bears heparan sulfate. May fulfill a function related to the motile behaviors of developing neurons (By similarity); Glypicans
RIPK2	RIPK2	Receptor-interacting serine/threonine-protein kinase 2; Serine/threonine/tyrosine kinase that plays an essential role in modulation of innate and adaptive immune responses. Upon stimulation by b [...]
PTPN11	PTPN11	Tyrosine-protein phosphatase non-receptor type 11; Acts downstream of various receptor and cytoplasmic protein tyrosine kinases to participate in the signal transduction from the cell surface to [...]
MET	MET	Hepatocyte growth factor receptor; Receptor tyrosine kinase that transduces signals from the extracellular matrix into the cytoplasm by binding to hepatocyte growth factor/HGF ligand. Regulates [...]
PTPN6	PTPN6	Tyrosine-protein phosphatase non-receptor type 6; Modulates signaling by tyrosine phosphorylated cell surface receptors such as KIT and the EGF receptor/EGFR. The SH2 regions may interact with o [...]
TRIM36	TRIM36	E3 ubiquitin-protein ligase TRIM36; E3 ubiquitin-protein ligase which mediates ubiquitination and subsequent proteasomal degradation of target proteins. Involved in chromosome segregation and ce [...]
